# Supplementary material for: Positive Selection Shaped the Convergent Evolution of Independently Expanded Kallikrein Subfamilies Expressed in Mouse and Rat Saliva Proteomes
Source: PLoS One. 2011 Jun 14;6(6):e20979. doi: 10.1371/journal.pone.0020979 (PMC3114847; doi:10.1371/journal.pone.0020979)
Supplement: Figure S4 — FASTA alignments of the mouse and rat species-specific kallikrein subfamilies were made with DNAsis Max (Hitachi) and the alignments saved as a text file. (FA) [file pone.0020979.s004.fa]

>Mouse Klk1
IVGGFNCEKNSQPWQVAVYRFTKYQCGGILLNANWVLTHCHND---KYQVWLGKNNFL
EDEPSAQHRLVSKAIPHPDFNMSLLNEHTPQPEDDYSNDLMLLRLKKPADITDVVKPIDL
PTEEPKLGSTCLASGWGSITPVKYEYPDELQCVNLKLLPNEDCAKAHIEKVTDDMLCAGD
MDGGKDTCAGDSGGPLICDGVLQGITSWGPSPCGKPNVPGIYTRVLNFNTWIRETMAEND

>Mm Klk1b1
IVGGFKCEKNSQPWHVAVYRYKEYICGGVLLDANWVLTHCYYE---KNNVWLGKNNLY
QDEPSAQHRLVSKSFLHPCYNMSLHRNRIQNPQDDYSYDLMLLRLSKPADITDVVKPIAL
PTEEPKLGSTCLASGWGSIIPVKFQYAKDLQCVNLKLLPNEDCDKAYVQKVTDVMLCAGV
KGGGKDTCKGDSGGPLICDGVLQGLTSWGYNPCGEPKKPGVYTKLIKFTSWIKDTLAQNP

>Mm Klk1b3
IVGGFKCEKNSQPWHVAVYRYTQYLCGGVLLDPNWVLTHCYDD---NYKVWLGKNNLF
KDEPSAQHRFVSKAIPHPGFNMSLMRKHIRFLEYDYSNDLMLLRLSKPADITDTVKPITL
PTEEPKLGSTCLASGWGSITPTKFQFTDDLYCVNLKLLPNEDCAKAHIEKVTDAMLCAGE
MDGGKDTCKGDSGGPLICDGVLQGITSWGHTPCGEPDMPGVYTKLNKFTSWIKDTMAKNP

>Mm Klk1b4
PVQSQVDCENSQPWHVAVYRFNKYQCGGVLLDRNWVLTHCYND---KYQVWLGKNNFL
EDEPSDQHRLVSKAIPHPDFNMSLLNEHTPQPEDDYSNDLMLLRLSKPADITDVVKPITL
PTEEPKLGSTCLASGWGSTTPIKFKYPDDLQCVNLKLLPNEDCDKAHEMKVTDAMLCAGE
MDGGSYTCEHDSGGPLICDGILQGITSWGPEPCGEPTEPSVYTKLIKFSSWIRETMANNP

>Mm Klk1b5
IFGGFNCEKNSQPWQVAVYRFTKYQCGGVLLNANWVLTHCHND---KYQVWLGKNNFF
EDEPSAQHRLVSKAIPHPDFNMSLLNEHTPQPEDDYSNDLMLLRLKKPADITDVVKPIDL
PTEEPKLGSTCLASGWGSITPVIYEPADDLQCVNFKLLPNEDCVKAHIEKVTDVMLCAGD
MDGGKDTCMGDSGGPLICDGVLHGITSWGPSPCGKPNVPGIYTKLIKFNSWIKDTIAKNA

>Mm Klk1b8
VVGGFNCEKNSQPWQVAVYDNKEHICGGVLLERNWVLTHCYVD---QYEVWLGKNKLF
QEEPSAQHRLVSKSFPHPGFNMSLLTLKEIPPGADFSNDLMLLRLSKPADITDAVKPITL
PTKESKLGSTCLASGWGSITPTKWQKPDDLQCVFLKLLPIKNCIENHNVKVTDVMLCAGE
MSGGKNICKGDSGGPLICDSVLQGITSTGPIPCGKPGVPAMYTNLIKFNSWIKDTMTKNS

>Mm Klk1b9
IVGGFKCEKNSQPWHVAVYRYNEYICGGVLLDANWVLTHCYYE---ENKVSLGKNNLY
EEEPSAQHRLVSKSFLHPGYNRSLHRNHIRHPEYDYSNDLMLLRLSKPADITDVVKPIAL
PTEEPKLGSTCLASGWGSTTPFKFQNAKDLQCVNLKLLPNEDCGKAHIEKVTDVMLCAGE
TDGGKDTCKGDSGGPLICDGVLQGITSWGFTPCGEPKKPGVYTKLIKFTSWIKDTMAKNL

>Mm Klk1b11
------------------------ICGGVLLDRNWVLTHCHVS---QYNVWLGKTKLF
QREPSAQHRMVSKSFPHPDYNMSLLIIHNPEPEDDESNDLMLLRLSEPADITDAVKPIAL
PTEEPKLGSTCLVSGWGSITPTKFQTPDDLQCVSIKLLPNEVCVKNHNQKVTDVMLCAGE
MGGGKDTCKGDSGGPLICDGVLHGITAWGPIPCGKPNTPGVYTKLIKFTNWIKDTMAKNP

>Mm Klk1b16
IVGGFKCEKNSQPWQVAVYYHKEHICGGVLLDRNWVLTHCYVD---ECEVWLGKNQLF
QEEPSAQNRLVSKSFPHPGFNMTLLTFEKLPPGADFSNDLMLLRLSKPADITDVVKPIDL
PTKEPKLDSTCLVSGWGSITPTKWQKPDDLQCMFTKLLPNENCAKAYLLKVTDVMLCTIE
MGEDKGPCVGDSGGPLICDGVLQGTVSIGPDPCGIPGVSAIYTNLVKFNSWIKDTMMKNA

>Mm Klk1b21
IVGGFNCEKNSQPWHVAVFRYNKYICGGVLLNPNWVLTHCYGN---QYNVWLGKNKLF
QHESSAQHRLVSKSFPHPDYNMSLMNDHTPHPEDDYSNDLMLLRLSKPADITDAVKPIDL
PTEEPKLGSTCLASGWGSITPTKWQIPNDLQCGFIKPLPNENCAKAYIHKVTDVMLCAGE
MGGGKDTCAGDSGGPLICDGVLQGITSWGSIPCAKPNAPAIYTKLIKFTSWIKDTMAKNP

>Mm Klk1b22
ILGGFKCEKNSQPWQVAVYYLDEYLCGGVLLDRNWVLTHCYED---KYNIWLGKNKLF
QDEPSAQHRLVSKSFPHPDFNMSLL--QSVPTGADLSNDLMLLRLSKPADITDVVKPIDL
PTTEPKLGSTCLASGWGSINQLIYQNPNDLQCVSIKLHPNEVCVKAHILKVTDVMLCAGE
MNGGKDTCKGDSGGPLICDGVLQGITSWGSTPCGEPNAPAIYTKLIKFTSWIKDTMAKNP

>Mm Klk1b24
VVGGFKCEKNSQPWHVAVFRYNKYICGGVLLNPNWVLTHCYGNATSQYNVWLGKNKLF
QREPSAQHRWVSKSFPHPDYNMSLLNDDIPQPKD-KSNDLMLLRLSEPADITDAVKPIDL
PTEEPKLGSTCLASGWGSITPTKWQKPNDLQCVFIKLLPNENCTKPYLHKVTDVMLCAGE
MGGGKDTCAGDSGGPLICDGILHGITSWGPVPCGKPNAPAIYTKLIKFASWIKDTMAKNP

>Mm Klk1b26
VVGGFNCEKNSQPWQVAVYYQKEHICGGVLLDRNWVLTHCYVD---QYEVWLGKNKLF
QEEPSAQHRLVSKSFPHPGFNMSLLMLQTTPPGADFSNDLMLLRLSKPADITDVVKPIAL
PTKEPKPGSTCLASGWGSITPTRWQKSDDLQCVFITLLPNENCAKVYLQKVTDVMLCAGE
MGGGKDTCAGDSGGPLICDGILQGTTSNGPEPCGKPGVPAIYTNLIKFNSWIKDTMMKNA

>Mm Klk1b27
IIGGFKCKKNSQPWHVAVLRSNKYICGGVLLDPNWVLTHCYGNDTSQHNVWLGKNKLF
QREPSAQHRWVSKSFPHPDYNMSLLNDHIPHPED-KSNDLMLLRLSKPADITDAVKPIDL
PTEEPKLGSTCLASGWGSITPTKYQIPNDLQCVFIKLLPNENCAKAYVHKVTDVMLCVGE
TGGGKGTCKGDSGGPLICDGVLHGITSWGSIPCAKPNAPGVFTKLIKFTSWIKDTMAKNP

>Rat Klk1 
VVGGYNCEMNSQPWQVAVYYFGEYLCGGVLIDPSWVITHCATD---NYQVWLGRNNLY
EDEPFAQHRLVSQSFPHPGFNQDLIWNHTRQPGDDYSNDLMLLHLSQPADITDGVKVIDL
PIEEPKVGSTCLASGWGSITPDGLELSDDLQCVNIDLLSNEKCVEAHKEEVTDLMLCAGE
MDGGKDTCKGDSGGPLICNGVLQGITSWGFNPCGEPKKPGIYTKLIKFTPWIKEVMKENP

>Rat Klk1c2 
IVGGYKCEKNSQPWQVAVIN--EYLCGGVLIDPSWVITHCYSN---NYQVLLGRNNLF
KDEPFAQRRLVRQSFRHPDYIPLIVTNDTEQPVHDHSNDLMLLHLSEPADITGGVKVIDL
PTKEPKVGSTCLASGWGSTNPSEMVVSHDLQCVNIHLLSNEKCIETYKDNVTDVMLCAGE
MEGGKDTCAGDSGGPLICDGVLQGITSGGATPCAKPKTPAIYAKLIKFTSWIKKVMKENP

>Rat Klk1c3 
------------------------------------------------------------
-----------------------LIWNHTRKPGD-YSNDLMLLHLSEPADITDGVKVIDL
PTKEPKVGSTCLVSGWGSTNPSEWEFPDDLQCVNIHLLSNEKCIKAYKEKVTDLMLCAGE
LEGGKDTCRGDSGGPLICDGVLQGITSWGSVPCGEPNKPGIYTKLIKFTSWIKEVMKENP

>Rat Klk1c4 
IVGGYKCEKNSQPWQVAVIN--RYLCGGVLIDPSWVITHCYSH---YYHVLLGRHNLF
EDEPFAQYRFVSQSFPHPDYNPFLMRNHTRQTGYDYSNDLMLLHLSEPADITDGVKVIDL
PTEEPKVGSTCLVSGWGSTKPLISELPDDLQCVNIDLLSNEKCIEAYRWKVTDLMLCAGK
LEGGKDACNGDSGGPLICDGVLQGLTSWGSVPCGEPHNPGIYTKIIKFTSWIKEVMKENP

>Rat Klk1c6 
VVGGYKCEKNSQPWQVAVIS--RSLCGGVLIDPSWVITHCYS-----YHVLLGRNNLS
EDEPFAQYRFVSQSFPHPDYNPFFMRNHTRQPGDDYSNDLMLLHLSKPADITDGVKVIDL
PTEEPKVGSTCLASGWGSTKPLDWELPDDLQCVNIHLLSNEKCIEAYNEKVTDLMLCAGD
LEGGKDTCKGDSGGPLICDGVLQGITSWGSDPCAEPNMPAIYTKLIKFTSWIKEVMKENS

>Rat Klk1c7 
VIGGYKCEKNSQPWQVALYSFTKYLCGGVLIDPSWVITHCSSN---NYQVWLGRNNLL
EDEPFAQHRLVSQSFPHPDYKPFLMRNHTRKPGDDHSNDLMLLHLSQPADITDGVKVIDL
PTEEPKVGSTCLASGWGSTKPLIWEFPDDLQCVNIHLLSNEKCIKAYKEKVTDLMLCAGE
LEGGKDTCTGDSGGPLLCDGVLQGITSWGSVPCAKTNMPAIYTKLIKFTSWIKEVMKENP

>Rat Klk1c8 
IIGGFNCEKNSQPWQVAVYHFNEPQCGGVLIHPSWVITHCYSV---NYQVWLGRNNLL
EDEPFAQHRLVSQSFPHPGFNLDIIKNHTRKPGNDYSNDLMLLHLKTPADITDGVKVIDL
PTEEPKVGSTCLTSGWGSITPLKWEFPDDLQCVNIHLLSNEKCIKAYNDEVTDVMLCAGE
MDGGKDICKGDSGGPLICDGVLQGITSWGSMPCGEPNKPSVYTKLIKFTSWMKKVMKENP

>Rat Klk1c9 
VVGGYNCETNSQPWQVAVIG--TTFCGGVLIDPSWVITHCYSK---NYRVLLGRNNLV
KDEPFAQRRLVSQSFQHPDYIPVFMRNHTRQRAYDHNNDLMLLHLSKPADITGGVKVIDL
PTEEPKVGSICLASGWGMTNPSEMKLSHDLQCVNIHLLSNEKCIETYKNIETDVTLCAGE
MDGGKDTCTGDSGGPLICDGVLQGLTSGGATPCAKPKTPAIYAKLIKFTSWIKKVMKENP

>Rat Klk1c10 
IVGGYKCEKNSQPWQVAIIN--EYLCGGVLIDPSWVITHCYSN---YYHVLLGRNNLF
EDEPFAQYRFVNQSFPHPDYKPFLMRNHTRQRGDDYSNDLMLLHLSEPADITDGVKVIDL
PTEEPKVGSTCLASGWGSTKPLNWELPDDLQCVNIHLLSNEKCIEAYEQKVTDLMLCAGE
MDGRKDTCKGDSGGPLICDGVLQGITSWGNVPCAEPYNPGVYTKLIKFTSWIKEVMKENP

>Rat Klk1c12 
VVGGYKCEKNSQPWQVAVIN--RYLCGGVLIDPSWVITHCYSH---NYHVLLGRNNLF
KDEPFAQYRVVNQSFPHPDYNPFFMKNHTLFPGDDHSNDLMLLHLSEPADITDGVKVIDL
PTEEPKVGSTCLASGWSSTKPLEWEFPDDLQCVNINILSNEKCIKAHTQMVTDVMLCAGE
LEGGKDTCNGDSGGPLLCDGVLQGITSWSSVPCGETNRPAIYTKLIKFTSWIKEVMKENS
