# Supplementary material for: Positive Selection Shaped the Convergent Evolution of Independently Expanded Kallikrein Subfamilies Expressed in Mouse and Rat Saliva Proteomes
Source: PLoS One. 2011 Jun 14;6(6):e20979. doi: 10.1371/journal.pone.0020979 (PMC3114847; doi:10.1371/journal.pone.0020979)
Supplement: Table S1 — Protein report for the genome mouse (C57BL/6 strain). (XLS) [file pone.0020979.s005.xls]

## Sheet: Protein Report for BK_209364_20
Table S1. Protein report for the genome mouse (C57BL/6 strain)a
Sex	Protein name	Protein accession numbers	Protein molecular weight (Da)	Protein identification probability	Number of unique peptides	Number of unique spectra	Number of total spectra	Percentage of total spectra	Percentage sequence coverage
Female	16.5 kDa submandibular gland glycoprotein	IPI00113710	14878.3	1	3	3	4	0	0.283
Female	16.5 kDa submandibular gland glycoprotein	IPI00113710	14878.3	1	2	2	5	0	0.13
Female	16.5 kDa submandibular gland glycoprotein	IPI00113710	14878.3	0.998	2	2	6	0	0.232
Male	16.5 kDa submandibular gland glycoprotein	IPI00113710	14878.3	1	3	3	27	0.0001	0.232
Male	16.5 kDa submandibular gland glycoprotein	IPI00113710	14878.3	1	3	3	47	0.0002	0.232
Female	Acidic mammalian chitinase	IPI00346516	51986.8	1	30	37	511	0.0025	0.381
Female	Acidic mammalian chitinase	IPI00346516	51986.8	1	28	36	451	0.0022	0.416
Female	Acidic mammalian chitinase	IPI00346516	51986.8	1	35	44	710	0.0044	0.664
Male	Acidic mammalian chitinase	IPI00346516	51986.8	1	23	26	373	0.0018	0.317
Male	Acidic mammalian chitinase	IPI00346516	51986.8	1	27	38	606	0.0028	0.366
Male	Acidic mammalian chitinase	IPI00346516	51986.8	1	39	48	866	0.0044	0.715
Female	Alpha-amylase 1	IPI00315893	57606.1	1	47	60	516	0.0025	0.636
Female	Alpha-amylase 1	IPI00315893	57606.1	1	32	44	479	0.0023	0.544
Female	Alpha-amylase 1	IPI00315893	57606.1	1	45	58	2021	0.0125	0.638
Male	Alpha-amylase 1	IPI00315893	57606.1	1	31	37	326	0.0016	0.462
Male	Alpha-amylase 1	IPI00315893	57606.1	1	42	49	508	0.0024	0.609
Male	Alpha-amylase 1	IPI00315893	57606.1	1	46	58	2238	0.0114	0.681
Female	Androgen binding protein alpha	IPI00127933	10062.2	1	12	16	203	0.001	0.533
Female	Androgen binding protein alpha	IPI00127933	10062.2	1	10	16	194	0.0009	0.543
Female	Androgen binding protein alpha	IPI00127933	10062.2	1	6	9	335	0.0021	0.478
Male	Androgen binding protein alpha	IPI00127933	10062.2	1	9	13	220	0.0011	0.609
Male	Androgen binding protein alpha	IPI00127933	10062.2	1	14	19	183	0.0009	0.543
Male	Androgen binding protein alpha	IPI00127933	10062.2	1	8	10	247	0.0013	0.489
Female	androgen binding protein gamma	IPI00170392	12776.9	1	10	18	157	0.0008	0.562
Female	androgen binding protein gamma	IPI00170392	12776.9	1	11	17	171	0.0008	0.527
Female	androgen binding protein gamma	IPI00170392	12776.9	1	12	19	340	0.0021	0.696
Male	androgen binding protein gamma	IPI00170392	12776.9	1	8	14	93	0.0004	0.393
Male	androgen binding protein gamma	IPI00170392	12776.9	1	7	13	184	0.0009	0.295
Male	androgen binding protein gamma	IPI00170392	12776.9	1	11	17	333	0.0017	0.696
Female	angiotensinogen	IPI00654069	52653.2	1	3	3	8	0	0.0871
Female	angiotensinogen	IPI00654069	52653.2	1	3	3	3	0	0.0726
Female	angiotensinogen	IPI00654069	52653.2	1	3	3	16	0.0001	0.131
Male	angiotensinogen	IPI00654069	52653.2	0.998	2	2	3	0	0.0892
Male	angiotensinogen	IPI00654069	52653.2	1	3	3	7	0	0.16
Female	Carbonic anhydrase 6	IPI00114881	36331	1	19	20	166	0.0008	0.344
Female	Carbonic anhydrase 6	IPI00114881	36331	1	16	17	196	0.001	0.344
Female	Carbonic anhydrase 6	IPI00114881	36331	1	23	27	575	0.0036	0.584
Male	Carbonic anhydrase 6	IPI00114881	36331	1	15	16	76	0.0004	0.366
Male	Carbonic anhydrase 6	IPI00114881	36331	1	20	21	154	0.0007	0.429
Male	Carbonic anhydrase 6	IPI00114881	36331	1	25	32	809	0.0041	0.543
Female	carbonic anhydrase VI precursor	IPI00420184	36477.2	1	2	3	34	0.0002	0.208
Female	carbonic anhydrase VI precursor	IPI00420184	36477.2	1	3	4	47	0.0002	0.246
Female	carbonic anhydrase VI precursor	IPI00420184	36477.2	1	6	8	196	0.0012	0.521
Male	carbonic anhydrase VI precursor	IPI00420184	36477.2	1	2	3	36	0.0002	0.186
Male	carbonic anhydrase VI precursor	IPI00420184	36477.2	1	2	3	28	0.0001	0.268
Male	carbonic anhydrase VI precursor	IPI00420184	36477.2	1	5	6	85	0.0004	0.467
Male	Chitinase-3-like protein 4	IPI00314910	44959.1	0.998	2	2	3	0	0.0522
Female	Cysteine-rich secretory protein 1	IPI00132195	27661.2	1	3	3	7	0	0.0492
Female	Cysteine-rich secretory protein 1	IPI00132195	27661.2	1	5	5	7	0	0.123
Female	Cysteine-rich secretory protein 1	IPI00132195	27661.2	1	9	10	68	0.0004	0.27
Male	Cysteine-rich secretory protein 1	IPI00132195	27661.2	1	5	5	7	0	0.082
Male	Cysteine-rich secretory protein 1	IPI00132195	27661.2	1	11	13	79	0.0004	0.307
Female	Dcpp2 protein	IPI00420775	16017.4	1	6	6	7	0	0.241
Female	Dcpp2 protein	IPI00420775	16017.4	0.998	2	2	5	0	0.145
Male	Dcpp2 protein	IPI00420775	16017.4	1	4	4	15	0.0001	0.276
Male	Dcpp2 protein	IPI00420775	16017.4	1	6	6	13	0.0001	0.269
Female	DD72 protein	IPI00124867	16433	1	2	3	26	0.0001	0.0946
Female	DD72 protein	IPI00124867	16433	1	3	4	19	0.0001	0.176
Female	DD72 protein	IPI00124867	16433	1	5	6	27	0.0002	0.412
Male	DD72 protein	IPI00124867	16433	1	3	3	7	0	0.155
Male	DD72 protein	IPI00124867	16433	1	3	3	5	0	0.162
Male	DD72 protein	IPI00124867	16433	1	4	5	39	0.0002	0.324
Female	demilune cell and parotid protein	IPI00118977	18587.6	1	12	14	155	0.0008	0.439
Female	demilune cell and parotid protein	IPI00118977	18587.6	1	11	12	114	0.0006	0.503
Female	demilune cell and parotid protein	IPI00118977	18587.6	1	11	13	314	0.0019	0.649
Male	demilune cell and parotid protein	IPI00118977	18587.6	1	14	15	111	0.0005	0.374
Male	demilune cell and parotid protein	IPI00118977	18587.6	1	12	18	678	0.0032	0.538
Male	demilune cell and parotid protein	IPI00118977	18587.6	1	13	15	915	0.0046	0.649
Female	demilune cell and parotid protein 2	IPI00662097	18575.5	1	4	6	69	0.0003	0.363
Female	demilune cell and parotid protein 2	IPI00662097	18575.5	1	3	4	25	0.0001	0.345
Female	demilune cell and parotid protein 2	IPI00662097	18575.5	1	5	5	68	0.0004	0.614
Male	demilune cell and parotid protein 2	IPI00662097	18575.5	1	2	3	63	0.0003	0.24
Male	demilune cell and parotid protein 2	IPI00662097	18575.5	1	4	6	274	0.0013	0.345
Male	demilune cell and parotid protein 2	IPI00662097	18575.5	1	4	4	98	0.0005	0.614
Female	demilune cell and parotid protein 3	IPI00469417	18620.3	1	8	10	56	0.0003	0.282
Female	demilune cell and parotid protein 3	IPI00469417	18620.3	1	6	7	33	0.0002	0.324
Female	demilune cell and parotid protein 3	IPI00469417	18620.3	1	8	11	79	0.0005	0.647
Male	demilune cell and parotid protein 3	IPI00469417	18620.3	1	9	10	80	0.0004	0.324
Male	demilune cell and parotid protein 3	IPI00469417	18620.3	1	8	11	118	0.0006	0.324
Male	demilune cell and parotid protein 3	IPI00469417	18620.3	1	10	13	171	0.0009	0.647
Female	Deoxyribonuclease-1	IPI00308684	32009.9	1	20	28	436	0.0021	0.324
Female	Deoxyribonuclease-1	IPI00308684	32009.9	1	14	20	228	0.0011	0.324
Female	Deoxyribonuclease-1	IPI00308684	32009.9	1	17	21	525	0.0032	0.511
Male	Deoxyribonuclease-1	IPI00308684	32009.9	1	18	25	200	0.001	0.352
Male	Deoxyribonuclease-1	IPI00308684	32009.9	1	19	29	474	0.0022	0.324
Male	Deoxyribonuclease-1	IPI00308684	32009.9	1	18	23	364	0.0019	0.493
Male	E3 SUMO-protein ligase RanBP2	IPI00337844	341073	0.998	2	2	3	0	0.0069
Female	Epidermal growth factor-binding protein type B	IPI00121818	28672	0.998	2	2	6	0	0.119
Male	Epidermal growth factor-binding protein type B	IPI00121818	28672	1	7	8	29	0.0001	0.326
Male	Epidermal growth factor-binding protein type B	IPI00121818	28672	1	7	9	36	0.0002	0.372
Male	Epidermal growth factor-binding protein type B	IPI00121818	28672	1	8	10	148	0.0008	0.391
Female	Extracellular peptidase inhibitor	IPI00126104	7769	0.998	2	2	6	0	0.162
Male	Extracellular peptidase inhibitor	IPI00126104	7769	0.998	2	2	5	0	0.162
Male	Extracellular peptidase inhibitor	IPI00126104	7769	0.999	2	2	6	0	0.162
Male	Extracellular peptidase inhibitor	IPI00126104	7769	0.998	2	2	21	0.0001	0.162
Female	gamma-glutamyl hydrolase precursor	IPI00828662	35453	0.998	2	2	4	0	0.192
Male	granulin	IPI00124640	64996.8	1	4	5	10	0.0001	0.0814
Female	hypothetical protein LOC381819	IPI00918176	11573	1	5	6	13	0.0001	0.35
Female	hypothetical protein LOC381819	IPI00918176	11573	1	5	7	27	0.0001	0.35
Female	hypothetical protein LOC381819	IPI00918176	11573	1	5	5	56	0.0003	0.35
Male	hypothetical protein LOC381819	IPI00918176	11573	1	4	4	10	0	0.35
Male	hypothetical protein LOC381819	IPI00918176	11573	1	5	5	12	0.0001	0.35
Male	hypothetical protein LOC381819	IPI00918176	11573	1	4	5	43	0.0002	0.35
Male	Isoform 1 of Vomeromodulin	IPI00349521	62431.3	1	5	6	12	0.0001	0.0998
Male	Isoform 2 of Myosin-XVIIIa	IPI00407425	195881	0.999	2	2	3	0	0.0215
Female	Isoform 2 of Submandibular gland protein C	IPI00405006	74365.1	1	9	12	28	0.0001	0.201
Female	Isoform 2 of Submandibular gland protein C	IPI00405006	74365.1	1	6	8	14	0.0001	0.15
Female	Isoform 2 of Submandibular gland protein C	IPI00405006	74365.1	1	10	11	58	0.0004	0.241
Female	Isoform 7 of Inositol 1,4,5-trisphosphate receptor type 1	IPI00117630	308645	0.998	2	2	3	0	0.0107
Female	Isoform I of Gamma-glutamyl hydrolase	IPI00129243	35420.9	1	12	19	123	0.0006	0.297
Female	Isoform I of Gamma-glutamyl hydrolase	IPI00129243	35420.9	1	8	12	108	0.0005	0.158
Female	Isoform I of Gamma-glutamyl hydrolase	IPI00129243	35420.9	1	9	12	79	0.0005	0.256
Male	Isoform I of Gamma-glutamyl hydrolase	IPI00129243	35420.9	1	9	12	50	0.0002	0.218
Male	Isoform I of Gamma-glutamyl hydrolase	IPI00129243	35420.9	1	9	14	52	0.0002	0.202
Male	Isoform I of Gamma-glutamyl hydrolase	IPI00129243	35420.9	1	9	11	72	0.0004	0.211
Female	Kallikrein 1-related peptidase b1	IPI00134580	29004.2	0.998	2	3	5	0	0.0728
Male	Kallikrein 1-related peptidase b1	IPI00134580	29004.2	1	9	13	46	0.0002	0.287
Male	Kallikrein 1-related peptidase b1	IPI00134580	29004.2	1	6	8	56	0.0003	0.261
Male	Kallikrein 1-related peptidase b1	IPI00134580	29004.2	1	9	11	61	0.0003	0.375
Male	Kallikrein 1-related peptidase b11	IPI00136034	28709.5	1	5	6	38	0.0002	0.299
Male	Kallikrein 1-related peptidase b11	IPI00136034	28709.5	1	7	9	66	0.0003	0.326
Male	Kallikrein 1-related peptidase b11	IPI00136034	28709.5	1	7	8	49	0.0002	0.33
Male	Kallikrein 1-related peptidase b16	IPI00113575	28704.9	1	7	11	46	0.0002	0.138
Male	Kallikrein 1-related peptidase b16	IPI00113575	28704.9	1	12	15	50	0.0002	0.345
Male	Kallikrein 1-related peptidase b16	IPI00113575	28704.9	1	10	14	100	0.0005	0.475
Male	Kallikrein 1-related peptidase b21	IPI00124822	28672.8	0.998	2	4	8	0	0.172
Male	Kallikrein 1-related peptidase b21	IPI00124822	28672.8	1	3	4	36	0.0002	0.268
Male	Kallikrein 1-related peptidase b22	IPI00136038	28366.7	1	7	10	51	0.0002	0.27
Male	Kallikrein 1-related peptidase b22	IPI00136038	28366.7	1	8	11	56	0.0003	0.398
Male	Kallikrein 1-related peptidase b22	IPI00136038	28366.7	1	10	13	133	0.0007	0.51
Male	Kallikrein 1-related peptidase b24	IPI00124804	28909.2	1	2	3	10	0	0.0837
Male	Kallikrein 1-related peptidase b24	IPI00124804	28909.2	1	3	5	28	0.0001	0.156
Male	Kallikrein 1-related peptidase b24	IPI00124804	28909.2	1	3	4	13	0.0001	0.27
Male	Kallikrein 1-related peptidase b26	IPI00121821	28445.4	1	3	4	38	0.0002	0.433
Male	Kallikrein 1-related peptidase b27	IPI00124824	28725	1	6	7	19	0.0001	0.232
Male	Kallikrein 1-related peptidase b27	IPI00124824	28725	1	8	9	17	0.0001	0.335
Male	Kallikrein 1-related peptidase b27	IPI00124824	28725	1	9	11	65	0.0003	0.49
Male	Kallikrein 1-related peptidase b3	IPI00134582	28981.4	1	3	4	15	0.0001	0.245
Male	Kallikrein 1-related peptidase b3	IPI00134582	28981.4	1	3	4	20	0.0001	0.18
Male	Kallikrein 1-related peptidase b3	IPI00134582	28981.4	1	3	5	28	0.0001	0.318
Female	Kallikrein 1-related peptidase b5	IPI00136033	28730.5	1	4	7	42	0.0002	0.126
Female	Kallikrein 1-related peptidase b5	IPI00136033	28730.5	1	3	5	74	0.0004	0.126
Female	Kallikrein 1-related peptidase b5	IPI00136033	28730.5	1	6	9	51	0.0003	0.199
Male	Kallikrein 1-related peptidase b5	IPI00136033	28730.5	1	6	8	23	0.0001	0.215
Male	Kallikrein 1-related peptidase b5	IPI00136033	28730.5	1	6	9	17	0.0001	0.18
Male	Kallikrein 1-related peptidase b5	IPI00136033	28730.5	1	8	10	69	0.0004	0.333
Male	Kallikrein 1-related peptidase b8	IPI00130801	28513.9	1	4	6	14	0.0001	0.192
Male	Kallikrein 1-related peptidase b8	IPI00130801	28513.9	1	4	6	15	0.0001	0.276
Male	Kallikrein 1-related peptidase b8	IPI00130801	28513.9	1	6	7	39	0.0002	0.433
Female	Kallikrein 1-related peptidase b9	IPI00136040	28882.9	0.998	2	2	9	0.0001	0.092
Male	Kallikrein 1-related peptidase b9	IPI00136040	28882.9	1	6	8	64	0.0003	0.253
Male	Kallikrein 1-related peptidase b9	IPI00136040	28882.9	1	10	13	50	0.0002	0.375
Male	Kallikrein 1-related peptidase b9	IPI00136040	28882.9	1	15	19	367	0.0019	0.617
Male	Kallikrein 1-related peptidase-like b4	IPI00316234	28530.8	1	6	9	24	0.0001	0.227
Male	Kallikrein 1-related peptidase-like b4	IPI00316234	28530.8	1	8	10	36	0.0002	0.227
Male	Kallikrein 1-related peptidase-like b4	IPI00316234	28530.8	1	5	5	23	0.0001	0.277
Female	Kallikrein-1	IPI00323869	28757.3	1	3	3	22	0.0001	0.226
Female	Kallikrein-1	IPI00323869	28757.3	0.998	2	2	23	0.0001	0.184
Female	Kallikrein-1	IPI00323869	28757.3	1	6	6	32	0.0002	0.483
Male	Kallikrein-1	IPI00323869	28757.3	0.998	2	2	7	0	0.184
Male	Kallikrein-1	IPI00323869	28757.3	1	2	2	12	0.0001	0.184
Male	Kallikrein-1	IPI00323869	28757.3	1	3	3	19	0.0001	0.303
Female	Keratin intermediate filament 16a	IPI00131209	52036.1	0.998	2	2	8	0	0.0781
Male	Keratin, type II cytoskeletal 5	IPI00139301	61750	1	2	2	2	0	0.0379
Female	lactoperoxidase	IPI00133770	80108.1	1	9	10	25	0.0001	0.146
Female	lactoperoxidase	IPI00133770	80108.1	1	5	5	18	0.0001	0.0873
Female	lactoperoxidase	IPI00133770	80108.1	1	11	11	42	0.0003	0.192
Male	lactoperoxidase	IPI00133770	80108.1	1	7	7	16	0.0001	0.101
Male	lactoperoxidase	IPI00133770	80108.1	1	7	8	28	0.0001	0.13
Male	lactoperoxidase	IPI00133770	80108.1	1	9	9	59	0.0003	0.183
Male	Long palate, lung and nasal epithelium carcinoma-associated protein 1	IPI00117756	52439.1	0.999	2	2	3	0	0.0464
Male	Long palate, lung and nasal epithelium carcinoma-associated protein 1	IPI00117756	52439.1	0.998	2	3	8	0	0.0464
Male	Lysosomal alpha-mannosidase	IPI00381303	114588	1	2	3	6	0	0.0257
Male	Lysosomal alpha-mannosidase	IPI00381303	114588	1	3	3	6	0	0.0355
Female	Major urinary protein 5	IPI00115243	20988.6	1	4	4	5	0	0.2
Male	Major urinary protein 5	IPI00115243	20988.6	1	3	3	11	0.0001	0.2
Male	Major urinary protein 5	IPI00115243	20988.6	1	4	5	49	0.0002	0.211
Male	Major urinary protein 5	IPI00115243	20988.6	1	3	3	8	0	0.194
Male	Mannosyl-oligosaccharide 1,2-alpha-mannosidase IA	IPI00132493	73261.1	0.998	2	2	3	0	0.0443
Female	mucin 10	IPI00116916	33534.7	1	6	8	44	0.0002	0.0962
Female	mucin 10	IPI00116916	33534.7	1	4	5	33	0.0002	0.0962
Female	mucin 10	IPI00116916	33534.7	1	9	11	195	0.0012	0.109
Male	mucin 10	IPI00116916	33534.7	1	3	3	9	0	0.0705
Male	mucin 10	IPI00116916	33534.7	1	3	4	8	0	0.144
Male	mucin 10	IPI00116916	33534.7	1	4	4	6	0	0.0897
Female	Mucin-19	IPI00464259	693483	1	3	3	3	0	0.0064
Male	nerve growth factor, beta isoform A	IPI00336602	33768.9	1	2	2	4	0	0.0684
Male	nerve growth factor, beta isoform A	IPI00336602	33768.9	1	3	3	7	0	0.0977
Female	Nucleobindin-2	IPI00309704	50287.4	1	3	3	10	0	0.0762
Female	Nucleobindin-2	IPI00309704	50287.4	1	3	4	8	0	0.1
Male	Nucleobindin-2	IPI00309704	50287.4	1	4	4	13	0.0001	0.138
Male	Nucleobindin-2	IPI00309704	50287.4	1	3	3	9	0	0.069
Female	Olfactory receptor Olfr460	IPI00125039	35329.8	0.998	2	2	2	0	0.086
Female	Ovostatin homolog	IPI00169490	162266	1	4	4	6	0	0.0398
Female	Ovostatin homolog	IPI00169490	162266	1	3	3	5	0	0.0275
Female	Ovostatin homolog	IPI00169490	162266	1	3	3	8	0	0.0323
Male	Ovostatin homolog	IPI00169490	162266	1	2	2	2	0	0.0165
Male	Ovostatin homolog	IPI00169490	162266	1	3	3	4	0	0.0275
Male	Ovostatin homolog	IPI00169490	162266	1	3	3	3	0	0.0282
Female	Pancreatic alpha-amylase	IPI00133544	57399.4	1	13	16	214	0.001	0.189
Female	Pancreatic alpha-amylase	IPI00133544	57399.4	1	12	13	154	0.0008	0.181
Female	Pancreatic alpha-amylase	IPI00133544	57399.4	1	12	14	260	0.0016	0.252
Male	Pancreatic alpha-amylase	IPI00133544	57399.4	1	9	13	97	0.0005	0.126
Male	Pancreatic alpha-amylase	IPI00133544	57399.4	1	10	14	107	0.0005	0.209
Male	Pancreatic alpha-amylase	IPI00133544	57399.4	1	14	18	367	0.0019	0.22
Female	Parotid secretory protein	IPI00131763	24736.5	1	54	75	2183	0.0106	0.804
Female	Parotid secretory protein	IPI00881015	22304.5	0.998	2	2	6	0	0.749
Female	Parotid secretory protein	IPI00131763	24736.5	1	47	62	3036	0.0148	0.847
Female	Parotid secretory protein	IPI00881015	22304.5	0.998	2	2	5	0	0.749
Female	Parotid secretory protein	IPI00131763	24736.5	1	25	31	1686	0.0104	0.638
Male	Parotid secretory protein	IPI00131763	24736.5	1	45	56	1802	0.0086	0.787
Male	Parotid secretory protein	IPI00131763	24736.5	1	53	67	3371	0.0158	0.868
Male	Parotid secretory protein	IPI00881015	22304.5	0.998	2	2	4	0	0.573
Male	Parotid secretory protein	IPI00131763	24736.5	1	25	33	2334	0.0118	0.63
Female	Polymeric immunoglobulin receptor	IPI00310059	84980.4	0.998	2	2	5	0	0.0285
Male	Polymeric immunoglobulin receptor	IPI00310059	84980.4	0.998	2	2	2	0	0.0285
Male	Polymeric immunoglobulin receptor	IPI00310059	84980.4	0.999	2	3	5	0	0.0285
Male	Pro-epidermal growth factor	IPI00132121	133126	1	4	5	7	0	0.046
Male	Pro-epidermal growth factor	IPI00132121	133126	1	3	4	7	0	0.0329
Male	Pro-epidermal growth factor	IPI00132121	133126	1	4	4	10	0.0001	0.0485
Female	Prolactin-inducible protein homolog	IPI00113711	16805.2	1	14	19	614	0.003	0.534
Female	Prolactin-inducible protein homolog	IPI00113711	16805.2	1	14	19	723	0.0035	0.637
Female	Prolactin-inducible protein homolog	IPI00113711	16805.2	1	8	12	410	0.0025	0.705
Male	Prolactin-inducible protein homolog	IPI00113711	16805.2	1	14	21	538	0.0026	0.534
Male	Prolactin-inducible protein homolog	IPI00113711	16805.2	1	17	23	980	0.0046	0.534
Male	Prolactin-inducible protein homolog	IPI00113711	16805.2	1	8	12	1002	0.0051	0.5
Male	Proline rich protein	IPI00276972	31109	0.998	2	3	13	0.0001	0.103
Female	Proline-rich protein BstNI subfamily 1	IPI00378614	51753.8	1	2	2	2	0	0.0893
Female	Proline-rich protein BstNI subfamily 1	IPI00378614	51753.8	1	2	2	2	0	0.0615
Male	Proline-rich protein BstNI subfamily 1	IPI00378614	51753.8	1	2	2	6	0	0.0496
Male	Proline-rich protein BstNI subfamily 1	IPI00378614	51753.8	1	4	4	6	0	0.107
Male	Proline-rich protein BstNI subfamily 1	IPI00378614	51753.8	1	2	2	5	0	0.0813
Female	proline-rich protein MP5	IPI00378976	31150.5	1	4	4	8	0	0.162
Female	proline-rich protein MP5	IPI00378976	31150.5	0.998	2	3	8	0	0.0642
Female	proline-rich protein MP5	IPI00378976	31150.5	1	5	5	29	0.0002	0.284
Male	proline-rich protein MP5	IPI00378976	31150.5	1	4	4	10	0	0.135
Male	proline-rich protein MP5	IPI00378976	31150.5	1	3	5	11	0.0001	0.135
Male	proline-rich protein MP5	IPI00378976	31150.5	1	7	8	64	0.0003	0.209
Female	Protein hairless	IPI00123616	127175	0.998	2	2	2	0	0.0406
Female	Putative uncharacterized protein	IPI00404881	44327.8	0.998	2	2	2	0	0.0406
Female	Putative uncharacterized protein	IPI00136226	18959.8	0.998	2	2	14	0.0001	0.217
Male	Putative uncharacterized protein	IPI00136226	18959.8	0.998	2	3	8	0	0.154
Male	Putative uncharacterized protein	IPI00112184	13064.6	0.999	2	2	12	0.0001	0.237
Male	Putative uncharacterized protein	IPI00136222	19451.6	0.998	2	2	3	0	0.104
Male	Putative uncharacterized protein	IPI00136226	18959.8	0.998	2	3	7	0	0.154
Male	Putative uncharacterized protein	IPI00112184	13064.6	1	2	2	9	0	0.237
Male	Putative uncharacterized protein	IPI00136222	19451.6	0.998	2	2	6	0	0.156
Male	Putative uncharacterized protein	IPI00136226	18959.8	1	3	3	23	0.0001	0.154
Female	Salivary androgen-binding protein beta subunit	IPI00153363	12354.2	1	9	11	158	0.0008	0.696
Female	Salivary androgen-binding protein beta subunit	IPI00153363	12354.2	1	5	7	115	0.0006	0.607
Female	Salivary androgen-binding protein beta subunit	IPI00153363	12354.2	1	10	12	119	0.0007	0.607
Male	Salivary androgen-binding protein beta subunit	IPI00153363	12354.2	1	6	8	132	0.0006	0.607
Male	Salivary androgen-binding protein beta subunit	IPI00153363	12354.2	1	7	8	114	0.0005	0.696
Male	Salivary androgen-binding protein beta subunit	IPI00153363	12354.2	1	10	11	246	0.0013	0.598
Male	salivary protein 1 precursor	IPI00655076	14784.2	1	2	2	6	0	0.232
Female	Serum albumin	IPI00131695	68674.9	1	2	2	2	0	0.0312
Female	Serum albumin	IPI00131695	68674.9	0.999	2	2	6	0	0.0428
Male	Serum albumin	IPI00131695	68674.9	1	4	4	5	0	0.0789
Female	similar to Predicted gene, EG381818	IPI00421224	45243.3	1	2	2	4	0	0.0561
Male	Sublingual parotid tongue-1 salivary protein	IPI00154104	18414	0.998	2	2	9	0	0.224
Female	Submaxillary gland androgen-regulated protein 3A	IPI00127277	15526.5	1	16	21	347	0.0017	0.51
Female	Submaxillary gland androgen-regulated protein 3A	IPI00127277	15526.5	1	13	17	309	0.0015	0.401
Female	Submaxillary gland androgen-regulated protein 3A	IPI00127277	15526.5	1	3	4	94	0.0006	0.245
Male	Submaxillary gland androgen-regulated protein 3A	IPI00127277	15526.5	1	19	21	260	0.0012	0.51
Male	Submaxillary gland androgen-regulated protein 3A	IPI00127277	15526.5	1	12	15	418	0.002	0.51
Male	Submaxillary gland androgen-regulated protein 3A	IPI00127277	15526.5	1	5	7	159	0.0008	0.245
Female	titin isoform N2-A	IPI00604969	3.7157e+06	1	2	2	2	0	0.0004
Male	titin isoform N2-A	IPI00604969	3.7157e+06	1	2	2	2	0	0.0008
Female	Transcobalamin-2	IPI00136556	47569.7	1	8	9	27	0.0001	0.188
Female	Transcobalamin-2	IPI00136556	47569.7	1	6	6	17	0.0001	0.184
Female	Transcobalamin-2	IPI00136556	47569.7	1	7	8	15	0.0001	0.251
Male	Transcobalamin-2	IPI00136556	47569.7	1	7	8	23	0.0001	0.135
Male	Transcobalamin-2	IPI00136556	47569.7	1	9	9	21	0.0001	0.24
Male	Transcobalamin-2	IPI00136556	47569.7	1	9	10	46	0.0002	0.242
Male	Tripartite motif-containing 45	IPI00886053	70306.1	0.998	2	2	15	0.0001	0.0298
Male	trypsinogen 7	IPI00131674	26404.1	0.998	2	2	3	0	0.0769
Female	Uncharacterized protein C6orf58 homolog	IPI00471102	38267.3	1	7	8	105	0.0005	0.291
Female	Uncharacterized protein C6orf58 homolog	IPI00471102	38267.3	1	9	12	86	0.0004	0.282
Female	Uncharacterized protein C6orf58 homolog	IPI00471102	38267.3	1	10	13	700	0.0043	0.401
Male	Uncharacterized protein C6orf58 homolog	IPI00471102	38267.3	1	5	5	35	0.0002	0.35
Male	Uncharacterized protein C6orf58 homolog	IPI00471102	38267.3	1	9	12	247	0.0012	0.35
Male	Uncharacterized protein C6orf58 homolog	IPI00471102	38267.3	1	16	22	3089	0.0157	0.466
Female	WAP four-disulfide core domain protein 12	IPI00120005	9540.7	0.998	2	2	11	0.0001	0.412
Male	WAP four-disulfide core domain protein 12	IPI00120005	9540.7	1	3	3	28	0.0001	0.318
Male	WAP four-disulfide core domain protein 12	IPI00120005	9540.7	1	2	2	43	0.0002	0.235
Male	WAP four-disulfide core domain protein 12	IPI00120005	9540.7	1	2	2	58	0.0003	0.412
Female	Zinc finger homeobox protein 3	IPI00119958	406551	0.999	2	2	4	0	0.0059
Female	Zinc finger homeobox protein 3	IPI00119958	406551	1	2	2	5	0	0.0067
Female	Zinc finger homeobox protein 3	IPI00119958	406551	1	2	2	4	0	0.0086
aSalivas for three males and three females were subjected to MUDPIT analysis and the spectra searched against the ipi.MOUSE.v3.78.fasta database
