# Supplementary material for: Positive Selection Shaped the Convergent Evolution of Independently Expanded Kallikrein Subfamilies Expressed in Mouse and Rat Saliva Proteomes
Source: PLoS One. 2011 Jun 14;6(6):e20979. doi: 10.1371/journal.pone.0020979 (PMC3114847; doi:10.1371/journal.pone.0020979)
Supplement: Table S2 — Peptide report for the genome mouse (C57BL/6 strain). (XLS) [file pone.0020979.s006.xls]

## Sheet: Peptide Report for BK_209364_20
Table S2. Peptide report for the genome mouse (C57BL/6 strain)a
Sex	Protein name	Protein accession numbers	Protein molecular weight (Da)	Protein identification probability	Number of unique peptides	Number of unique spectra	Number of total spectra	Percentage of total spectra	Percentage sequence coverage	Peptide sequence	Previous amino acid	Next amino acid	Best Peptide identification probability	Best SEQUEST XCorr score	Best SEQUEST DCn score	Best X! Tandem -log(e) score	Number of identified +1H spectra	Number of identified +2H spectra	Number of identified +3H spectra	Number of identified +4H spectra	Number of enzymatic termini	Calculated +1H Peptide Mass (AMU)	Peptide start index	Peptide stop index	Other Proteins
Female	16.5 kDa submandibular gland glycoprotein	IPI00113710	14878.3	1	3	3	4	1.95e-05	0.283	DQNSGVDNTETEEESNAK	S	T	0.95	3.16	0.466	0	0	1	0	0	1	1966.81	97	114
Female	16.5 kDa submandibular gland glycoprotein	IPI00113710	14878.3	1	3	3	4	1.95e-05	0.283	KEELNDNSTGDNTSDQNSGVDNTETEEESNAK	N	T	0.95	8.22	0.495	0	0	0	2	0	1	3471.44	83	114
Female	16.5 kDa submandibular gland glycoprotein	IPI00113710	14878.3	1	3	3	4	1.95e-05	0.283	LKNFLQR	K	-	0.95	2.73	0.122	0	0	1	0	0	2	918.553	131	137
Female	16.5 kDa submandibular gland glycoprotein	IPI00113710	14878.3	1	2	2	5	2.44e-05	0.13	DQNSGVDNTETEEESNAK	S	T	0.95	5.77	0.517	0	0	2	0	0	1	1966.81	97	114
Female	16.5 kDa submandibular gland glycoprotein	IPI00113710	14878.3	1	2	2	5	2.44e-05	0.13	SGVDNTETEEESNAK	N	T	0.95	4.54	0.424	0	0	3	0	0	1	1609.68	100	114
Female	16.5 kDa submandibular gland glycoprotein	IPI00113710	14878.3	0.998	2	2	6	3.71e-05	0.232	KEELNDNSTGDNTSDQNSGVDNTETEEESNAK	N	T	0.95	6.78	0.489	0	0	0	4	0	1	3471.44	83	114
Female	16.5 kDa submandibular gland glycoprotein	IPI00113710	14878.3	0.998	2	2	6	3.71e-05	0.232	SGVDNTETEEESNAK	N	T	0.95	4.4	0.432	0	0	2	0	0	1	1609.68	100	114
Male	16.5 kDa submandibular gland glycoprotein	IPI00113710	14878.3	1	3	3	27	0.000126	0.232	KEELNDNSTGDNTSDQNSGVDNTETEEESNAK	N	T	0.95	10.6	0.594	0	0	0	1	0	1	3471.44	83	114
Male	16.5 kDa submandibular gland glycoprotein	IPI00113710	14878.3	1	3	3	27	0.000126	0.232	NSGVDNTETEEESNAK	Q	T	0.95	5.51	0.49	0	0	23	0	0	1	1723.73	99	114
Male	16.5 kDa submandibular gland glycoprotein	IPI00113710	14878.3	1	3	3	27	0.000126	0.232	SGVDNTETEEESNAK	N	T	0.95	4.18	0.411	0	0	3	0	0	1	1609.68	100	114
Male	16.5 kDa submandibular gland glycoprotein	IPI00113710	14878.3	1	3	3	47	0.000239	0.232	KEELNDNSTGDNTSDQNSGVDNTETEEESNAK	N	T	0.95	7.52	0.618	0	0	0	3	0	1	3471.44	83	114
Male	16.5 kDa submandibular gland glycoprotein	IPI00113710	14878.3	1	3	3	47	0.000239	0.232	NSGVDNTETEEESNAK	Q	T	0.95	5.8	0.474	0	0	42	0	0	1	1723.73	99	114
Male	16.5 kDa submandibular gland glycoprotein	IPI00113710	14878.3	1	3	3	47	0.000239	0.232	SGVDNTETEEESNAK	N	T	0.95	4.26	0.41	0	0	2	0	0	1	1609.68	100	114
Female	Acidic mammalian chitinase	IPI00346516	51986.8	1	30	37	511	0.00249	0.381	AAVAGGISNIQAGYEIPELSK	T	Y	0.95	6.55	0.509	0	0	3	0	0	1	2088.1	182	202
Female	Acidic mammalian chitinase	IPI00346516	51986.8	1	30	37	511	0.00249	0.381	ADGLYPVADDR	K	N	0.95	4.08	0.361	3.8	0	10	0	0	2	1191.56	431	441
Female	Acidic mammalian chitinase	IPI00346516	51986.8	1	30	37	511	0.00249	0.381	AFEQEAIESNRPR	E	L	0.95	3.12	0.15	0	0	1	0	0	1	1546.76	165	177
Female	Acidic mammalian chitinase	IPI00346516	51986.8	1	30	37	511	0.00249	0.381	AGGISNIQAGYEIPELSK	V	Y	0.95	4.19	0.379	0	0	1	0	0	1	1846.96	185	202
Female	Acidic mammalian chitinase	IPI00346516	51986.8	1	30	37	511	0.00249	0.381	AIDLDDFTGSFCDQGK	W	F	0.95	5.49	0.475	0	0	16	0	0	1	1788.78	361	376
Female	Acidic mammalian chitinase	IPI00346516	51986.8	1	30	37	511	0.00249	0.381	AVAGGISNIQAGYEIPELSK	A	Y	0.95	6.04	0.536	0	0	9	0	0	1	2017.06	183	202
Female	Acidic mammalian chitinase	IPI00346516	51986.8	1	30	37	511	0.00249	0.381	CADKADGLYPVADDR	F	N	0.95	4.38	0.22	0	0	2	0	0	1	1665.75	427	441
Female	Acidic mammalian chitinase	IPI00346516	51986.8	1	30	37	511	0.00249	0.381	DLDWEYPGSR	L	G	0.95	3.23	0.317	0	0	2	0	0	1	1237.55	136	145
Female	Acidic mammalian chitinase	IPI00346516	51986.8	1	30	37	511	0.00249	0.381	EAFEQEAIESNRPR	R	L	0.95	0	0	3.7	0	5	4	0	2	1657.79	164	177
Female	Acidic mammalian chitinase	IPI00346516	51986.8	1	30	37	511	0.00249	0.381	FEQEAIESNRPR	A	L	0.95	3.04	0.225	0	0	1	0	0	1	1475.72	166	177
Female	Acidic mammalian chitinase	IPI00346516	51986.8	1	30	37	511	0.00249	0.381	FPLTSTLNK	K	A	0.95	2.84	0.195	2.49	5	7	0	0	2	1020.57	377	385
Female	Acidic mammalian chitinase	IPI00346516	51986.8	1	30	37	511	0.00249	0.381	GFDGLDLDWEYPGSR	Y	G	0.95	4.58	0.54	0	0	23	0	0	1	1726.77	131	145
Female	Acidic mammalian chitinase	IPI00346516	51986.8	1	30	37	511	0.00249	0.381	GGISNIQAGYEIPELSK	A	Y	0.95	6.19	0.39	0	0	4	0	0	1	1775.92	186	202
Female	Acidic mammalian chitinase	IPI00346516	51986.8	1	30	37	511	0.00249	0.381	IDLDDFTGSFCDQGK	A	F	0.95	4.53	0.276	0	0	1	0	0	1	1717.74	362	376
Female	Acidic mammalian chitinase	IPI00346516	51986.8	1	30	37	511	0.00249	0.381	IQAGYEIPELSK	N	Y	0.95	4.24	0.337	0	0	4	0	0	1	1347.72	191	202
Female	Acidic mammalian chitinase	IPI00346516	51986.8	1	30	37	511	0.00249	0.381	IWAIDLDDFTGSFCDQGK	M	F	0.95	6.52	0.546	0	0	8	1	0	1	2087.94	359	376
Female	Acidic mammalian chitinase	IPI00346516	51986.8	1	30	37	511	0.00249	0.381	LIVGFPEYGHT	K	F	0.95	3	0.296	0	0	3	0	0	1	1232.63	260	270
Female	Acidic mammalian chitinase	IPI00346516	51986.8	1	30	37	511	0.00249	0.381	LIVGFPEYGHTF	K	I	0.95	3.6	0.38	0	15	162	0	0	1	1379.7	260	271
Female	Acidic mammalian chitinase	IPI00346516	51986.8	1	30	37	511	0.00249	0.381	LMVTAAVAGGISNIQAGYEIPELSK	R	Y	0.95	6.42	0.45	9.59	0	0	1	0	2	2532.34	178	202
Female	Acidic mammalian chitinase	IPI00346516	51986.8	1	30	37	511	0.00249	0.381	PGLGSFKPDDINPCLCTHLIY	R	A	0.95	3.58	0.425	0	0	3	3	0	0	2417.16	36	56
Female	Acidic mammalian chitinase	IPI00346516	51986.8	1	30	37	511	0.00249	0.381	PLTSTLNK	F	A	0.95	2.96	0.108	0	0	1	0	0	1	873.505	378	385
Female	Acidic mammalian chitinase	IPI00346516	51986.8	1	30	37	511	0.00249	0.381	QYGFDGLDLDWEYPGSR	R	G	0.95	0	0	9.17	0	158	11	0	2	2000.87	129	145
Female	Acidic mammalian chitinase	IPI00346516	51986.8	1	30	37	511	0.00249	0.381	QYGFDGLDLDWEYPGSRG	R	S	0.95	4.62	0.415	0	0	4	0	0	1	2074.91	129	146
Female	Acidic mammalian chitinase	IPI00346516	51986.8	1	30	37	511	0.00249	0.381	SGATEVWDASQEVPY	R	A	0.95	4.9	0.526	0	0	4	0	0	1	1638.73	312	326
Female	Acidic mammalian chitinase	IPI00346516	51986.8	1	30	37	511	0.00249	0.381	TLLAIGGWNF	K	G	0.95	3.26	0.353	0	2	0	0	0	1	1091.59	92	101
Female	Acidic mammalian chitinase	IPI00346516	51986.8	1	30	37	511	0.00249	0.381	VAGGISNIQAGYEIPELSK	A	Y	0.95	5.91	0.491	0	0	6	3	0	1	1946.02	184	202
Female	Acidic mammalian chitinase	IPI00346516	51986.8	1	30	37	511	0.00249	0.381	WEGYTGENSPLYK	S	Y	0.95	4.48	0.359	0	0	1	0	0	1	1543.71	218	230
Female	Acidic mammalian chitinase	IPI00346516	51986.8	1	30	37	511	0.00249	0.381	YGFDGLDLDWEYPGSR	Q	G	0.95	5.81	0.528	0	0	6	0	0	1	1889.83	130	145
Female	Acidic mammalian chitinase	IPI00346516	51986.8	1	30	37	511	0.00249	0.381	YLDFIHVM	K	T	0.95	3.55	0.434	0	0	17	0	0	1	1037.51	203	210
Female	Acidic mammalian chitinase	IPI00346516	51986.8	1	30	37	511	0.00249	0.381	YLDFIHVMTY	K	D	0.95	3.46	0.412	0	0	4	0	0	1	1301.62	203	212
Female	Acidic mammalian chitinase	IPI00346516	51986.8	1	28	36	451	0.0022	0.416	ADGLYPVADDR	K	N	0.95	3.98	0.345	5.7	2	12	0	0	2	1191.56	431	441
Female	Acidic mammalian chitinase	IPI00346516	51986.8	1	28	36	451	0.0022	0.416	AIDLDDFTGSFCDQGK	W	F	0.95	5.47	0.504	0	0	21	0	0	1	1788.78	361	376
Female	Acidic mammalian chitinase	IPI00346516	51986.8	1	28	36	451	0.0022	0.416	AVAGGISNIQAGYEIPELSK	A	Y	0.95	5.74	0.503	0	0	1	0	0	1	2017.06	183	202
Female	Acidic mammalian chitinase	IPI00346516	51986.8	1	28	36	451	0.0022	0.416	CADKADGLYPVADDR	F	N	0.95	4.11	0.233	0	0	1	0	0	1	1665.75	427	441
Female	Acidic mammalian chitinase	IPI00346516	51986.8	1	28	36	451	0.0022	0.416	DGLDLDWEYPGSR	F	G	0.95	4.49	0.362	0	0	1	0	0	1	1522.68	133	145
Female	Acidic mammalian chitinase	IPI00346516	51986.8	1	28	36	451	0.0022	0.416	DLDWEYPGSR	L	G	0.95	3.33	0.293	0	0	1	0	0	1	1237.55	136	145
Female	Acidic mammalian chitinase	IPI00346516	51986.8	1	28	36	451	0.0022	0.416	EAFEQEAIESN	R	R	0.95	2.98	0.315	0	0	1	0	0	1	1266.55	164	174
Female	Acidic mammalian chitinase	IPI00346516	51986.8	1	28	36	451	0.0022	0.416	EAFEQEAIESNRPR	R	L	0.95	0	0	4.47	0	10	5	0	2	1657.79	164	177
Female	Acidic mammalian chitinase	IPI00346516	51986.8	1	28	36	451	0.0022	0.416	FEQEAIESNRPR	A	L	0.95	3.15	0.285	0	0	2	0	0	1	1475.72	166	177
Female	Acidic mammalian chitinase	IPI00346516	51986.8	1	28	36	451	0.0022	0.416	FPLTSTLNK	K	A	0.95	2.94	0.243	4.36	4	7	0	0	2	1020.57	377	385
Female	Acidic mammalian chitinase	IPI00346516	51986.8	1	28	36	451	0.0022	0.416	GFDGLDLDWEYPGSR	Y	G	0.95	5.71	0.526	0	0	16	0	0	1	1726.77	131	145
Female	Acidic mammalian chitinase	IPI00346516	51986.8	1	28	36	451	0.0022	0.416	GGISNIQAGYEIPELSK	A	Y	0.95	6.06	0.408	0	0	6	0	0	1	1775.92	186	202
Female	Acidic mammalian chitinase	IPI00346516	51986.8	1	28	36	451	0.0022	0.416	IQAGYEIPELSK	N	Y	0.95	4.46	0.312	0	0	3	0	0	1	1347.72	191	202
Female	Acidic mammalian chitinase	IPI00346516	51986.8	1	28	36	451	0.0022	0.416	IWAIDLDDFTGSFCDQGK	M	F	0.95	4.73	0.519	0	0	2	0	0	1	2087.94	359	376
Female	Acidic mammalian chitinase	IPI00346516	51986.8	1	28	36	451	0.0022	0.416	LIVGFPEYGHT	K	F	0.95	2.85	0.276	0	0	1	0	0	1	1232.63	260	270
Female	Acidic mammalian chitinase	IPI00346516	51986.8	1	28	36	451	0.0022	0.416	LIVGFPEYGHTF	K	I	0.95	3.93	0.414	0	11	88	0	0	1	1379.7	260	271
Female	Acidic mammalian chitinase	IPI00346516	51986.8	1	28	36	451	0.0022	0.416	NPSDNGIGAPTSGDGPAGPY	R	T	0.95	5.03	0.562	0	0	3	0	0	1	1843.81	275	294
Female	Acidic mammalian chitinase	IPI00346516	51986.8	1	28	36	451	0.0022	0.416	PGLGSFKPDDINPCLCTH	R	L	0.95	5.4	0.406	0	0	1	1	0	0	2027.93	36	53
Female	Acidic mammalian chitinase	IPI00346516	51986.8	1	28	36	451	0.0022	0.416	PGLGSFKPDDINPCLCTHLIY	R	A	0.95	4.74	0.348	0	0	3	5	0	0	2417.16	36	56
Female	Acidic mammalian chitinase	IPI00346516	51986.8	1	28	36	451	0.0022	0.416	QYGFDGLDLDWEYPGSR	R	G	0.95	0	0	8.46	0	192	13	0	2	2000.87	129	145
Female	Acidic mammalian chitinase	IPI00346516	51986.8	1	28	36	451	0.0022	0.416	QYGFDGLDLDWEYPGSRG	R	S	0.95	3.96	0.226	0	0	3	0	0	1	2074.91	129	146
Female	Acidic mammalian chitinase	IPI00346516	51986.8	1	28	36	451	0.0022	0.416	SGATEVWDASQEVPY	R	A	0.95	4.28	0.379	0	0	3	0	0	1	1638.73	312	326
Female	Acidic mammalian chitinase	IPI00346516	51986.8	1	28	36	451	0.0022	0.416	TLLAIGGWNF	K	G	0.95	3.18	0.345	0	3	0	0	0	1	1091.59	92	101
Female	Acidic mammalian chitinase	IPI00346516	51986.8	1	28	36	451	0.0022	0.416	TLLAIGGWNFGTAPF	K	T	0.95	5.07	0.443	0	0	3	0	0	1	1564.82	92	106
Female	Acidic mammalian chitinase	IPI00346516	51986.8	1	28	36	451	0.0022	0.416	VAGGISNIQAGYEIPELSK	A	Y	0.95	6.47	0.496	0	0	12	1	0	1	1946.02	184	202
Female	Acidic mammalian chitinase	IPI00346516	51986.8	1	28	36	451	0.0022	0.416	YLDFIHVM	K	T	0.95	3.55	0.419	0	0	11	0	0	1	1037.51	203	210
Female	Acidic mammalian chitinase	IPI00346516	51986.8	1	28	36	451	0.0022	0.416	YLDFIHVMTY	K	D	0.95	2.65	0.308	0	0	1	0	0	1	1301.62	203	212
Female	Acidic mammalian chitinase	IPI00346516	51986.8	1	28	36	451	0.0022	0.416	YPTETGSNAY	K	L	0.95	3.07	0.333	0	0	1	0	0	1	1102.47	231	240
Female	Acidic mammalian chitinase	IPI00346516	51986.8	1	35	44	710	0.00439	0.664	ADGLYPVADDR	K	N	0.95	3.97	0.254	5.37	0	5	0	0	2	1191.56	431	441
Female	Acidic mammalian chitinase	IPI00346516	51986.8	1	35	44	710	0.00439	0.664	AFNDLK	K	N	0.95	2.21	0.121	1.14	3	0	0	0	2	707.373	79	84
Female	Acidic mammalian chitinase	IPI00346516	51986.8	1	35	44	710	0.00439	0.664	AGMQNNEITTIEWNDVTLYK	F	A	0.95	6.41	0.447	0	0	4	0	0	1	2340.12	59	78
Female	Acidic mammalian chitinase	IPI00346516	51986.8	1	35	44	710	0.00439	0.664	AIDLDDFTGSFCDQGK	W	F	0.95	5.16	0.474	0	0	2	0	0	1	1788.78	361	376
Female	Acidic mammalian chitinase	IPI00346516	51986.8	1	35	44	710	0.00439	0.664	ANEWLGYDNIK	K	S	0.95	3.83	0.33	2.33	5	3	0	0	2	1322.64	330	340
Female	Acidic mammalian chitinase	IPI00346516	51986.8	1	35	44	710	0.00439	0.664	DLHGSWEGYTGENSPLYK	Y	Y	0.95	6.29	0.502	0	0	12	0	0	1	2052.93	213	230
Female	Acidic mammalian chitinase	IPI00346516	51986.8	1	35	44	710	0.00439	0.664	EAFEQEAIESNRPR	R	L	0.95	2.96	0.413	0	0	23	0	0	2	1675.8	164	177
Female	Acidic mammalian chitinase	IPI00346516	51986.8	1	35	44	710	0.00439	0.664	FEQEAIESNRPR	A	L	0.95	3.19	0.194	0	0	1	0	0	1	1475.72	166	177
Female	Acidic mammalian chitinase	IPI00346516	51986.8	1	35	44	710	0.00439	0.664	FPLTSTLNK	K	A	0.95	3.29	0.258	2.6	4	2	0	0	2	1020.57	377	385
Female	Acidic mammalian chitinase	IPI00346516	51986.8	1	35	44	710	0.00439	0.664	FTNWAQYR	Y	P	0.95	3.08	0.287	0	0	1	0	0	0	1085.52	28	35
Female	Acidic mammalian chitinase	IPI00346516	51986.8	1	35	44	710	0.00439	0.664	GFPEYGHTFILR	V	N	0.95	3.17	0.391	0	0	3	0	0	1	1436.73	263	274
Female	Acidic mammalian chitinase	IPI00346516	51986.8	1	35	44	710	0.00439	0.664	HLFTVLVK	K	E	0.95	3.16	0.242	2.7	65	33	0	0	2	956.593	153	160
Female	Acidic mammalian chitinase	IPI00346516	51986.8	1	35	44	710	0.00439	0.664	IVGFPEYGHTFILR	L	N	0.95	3.65	0.529	0	0	3	0	0	1	1648.89	261	274
Female	Acidic mammalian chitinase	IPI00346516	51986.8	1	35	44	710	0.00439	0.664	IWAIDLDDFTGSFCDQGK	M	F	0.95	6.52	0.536	0	0	3	0	0	1	2087.94	359	376
Female	Acidic mammalian chitinase	IPI00346516	51986.8	1	35	44	710	0.00439	0.664	LIVGFPEYGHTF	K	I	0.95	3.56	0.369	0	2	3	0	0	1	1379.7	260	271
Female	Acidic mammalian chitinase	IPI00346516	51986.8	1	35	44	710	0.00439	0.664	LIVGFPEYGHTFILR	K	N	0.95	4.74	0.42	6.37	0	52	0	0	2	1761.97	260	274
Female	Acidic mammalian chitinase	IPI00346516	51986.8	1	35	44	710	0.00439	0.664	NLICYFTNWAQYR	Y	P	0.95	5.42	0.375	0	0	4	0	0	0	1748.82	23	35
Female	Acidic mammalian chitinase	IPI00346516	51986.8	1	35	44	710	0.00439	0.664	NPSDNGIGAPTSGDGPAGPYTR	R	Q	0.95	6.43	0.585	14.5	0	16	0	0	2	2100.96	275	296
Female	Acidic mammalian chitinase	IPI00346516	51986.8	1	35	44	710	0.00439	0.664	PEYGHTFILR	F	N	0.95	3.58	0.338	0	0	4	0	0	1	1232.64	265	274
Female	Acidic mammalian chitinase	IPI00346516	51986.8	1	35	44	710	0.00439	0.664	PGLGSFKPDDINPCLCTHLIYAF	R	A	0.95	4.3	0.291	0	0	6	0	0	0	2635.27	36	58
Female	Acidic mammalian chitinase	IPI00346516	51986.8	1	35	44	710	0.00439	0.664	PLTSTLNK	F	A	0.95	2.82	0.204	0	0	1	0	0	1	873.505	378	385
Female	Acidic mammalian chitinase	IPI00346516	51986.8	1	35	44	710	0.00439	0.664	QAGFWAYYEICTFLR	R	S	0.95	0	0	10.1	0	94	0	0	2	1924.91	297	311
Female	Acidic mammalian chitinase	IPI00346516	51986.8	1	35	44	710	0.00439	0.664	QNNFGGAMIWAIDLDDFTGSFCDQGK	K	F	0.95	0	0	10.7	0	2	8	0	2	2907.27	351	376
Female	Acidic mammalian chitinase	IPI00346516	51986.8	1	35	44	710	0.00439	0.664	QTFITSVIK	R	F	0.95	1.85	0	3.15	1	0	0	0	2	1036.6	117	125
Female	Acidic mammalian chitinase	IPI00346516	51986.8	1	35	44	710	0.00439	0.664	QYGFDGLDLDWEYPGSR	R	G	0.95	0	0	9.3	0	112	0	0	2	2000.87	129	145
Female	Acidic mammalian chitinase	IPI00346516	51986.8	1	35	44	710	0.00439	0.664	QYGFDGLDLDWEYPGSRG	R	S	0.95	4.33	0.341	0	0	1	0	0	1	2074.91	129	146
Female	Acidic mammalian chitinase	IPI00346516	51986.8	1	35	44	710	0.00439	0.664	SGATEVWDASQEVPYAYK	R	A	0.95	6.16	0.512	7.49	0	10	1	0	2	2000.92	312	329
Female	Acidic mammalian chitinase	IPI00346516	51986.8	1	35	44	710	0.00439	0.664	TLLAIGGWNFGTAPFTTMVSTSQNR	K	Q	0.95	6.18	0.645	10.3	0	3	4	0	2	2670.34	92	116
Female	Acidic mammalian chitinase	IPI00346516	51986.8	1	35	44	710	0.00439	0.664	TYDLHGSWEGYTGENSPLYK	M	Y	0.95	6.33	0.559	0	0	13	8	0	1	2317.04	211	230
Female	Acidic mammalian chitinase	IPI00346516	51986.8	1	35	44	710	0.00439	0.664	VGFPEYGHTFILR	I	N	0.95	3.86	0.27	0	0	6	0	0	1	1535.8	262	274
Female	Acidic mammalian chitinase	IPI00346516	51986.8	1	35	44	710	0.00439	0.664	YLDFIHVMTYDLH	K	G	0.95	5.22	0.481	0	0	2	0	0	1	1666.79	203	215
Female	Acidic mammalian chitinase	IPI00346516	51986.8	1	35	44	710	0.00439	0.664	YLDFIHVMTYDLHGSWEGYTGENSPLYK	K	Y	0.95	0	0	10.1	0	0	61	0	2	3351.53	203	230
Female	Acidic mammalian chitinase	IPI00346516	51986.8	1	35	44	710	0.00439	0.664	YNLICYFTNWAQYR	A	P	0.95	5.39	0.544	0	0	22	0	0	0	1911.89	22	35
Female	Acidic mammalian chitinase	IPI00346516	51986.8	1	35	44	710	0.00439	0.664	YPTETGSNAYLNVDYVMNYWK	K	N	0.95	6.28	0.551	7.34	0	100	1	0	2	2528.14	231	251
Female	Acidic mammalian chitinase	IPI00346516	51986.8	1	35	44	710	0.00439	0.664	YPTETGSNAYLNVDYVMNYWKN	K	N	0.95	5.33	0.3	0	0	1	0	0	1	2642.19	231	252
Male	Acidic mammalian chitinase	IPI00346516	51986.8	1	23	26	373	0.00178	0.317	AAVAGGISNIQAGYEIPELSK	T	Y	0.95	6.42	0.549	0	0	2	0	0	1	2088.1	182	202
Male	Acidic mammalian chitinase	IPI00346516	51986.8	1	23	26	373	0.00178	0.317	ADGLYPVADDR	K	N	0.95	3.97	0.372	6.04	0	34	0	0	2	1191.56	431	441
Male	Acidic mammalian chitinase	IPI00346516	51986.8	1	23	26	373	0.00178	0.317	AIDLDDFTGSFCDQGK	W	F	0.95	6.16	0.505	0	0	20	0	0	1	1788.78	361	376
Male	Acidic mammalian chitinase	IPI00346516	51986.8	1	23	26	373	0.00178	0.317	AVAGGISNIQAGYEIPELSK	A	Y	0.95	6.08	0.528	0	0	6	0	0	1	2017.06	183	202
Male	Acidic mammalian chitinase	IPI00346516	51986.8	1	23	26	373	0.00178	0.317	EAFEQEAIESNRPR	R	L	0.95	2.69	0.0874	3.37	0	6	0	0	2	1675.8	164	177
Male	Acidic mammalian chitinase	IPI00346516	51986.8	1	23	26	373	0.00178	0.317	FPLTSTLNK	K	A	0.95	2.84	0.192	2.03	3	18	0	0	2	1020.57	377	385
Male	Acidic mammalian chitinase	IPI00346516	51986.8	1	23	26	373	0.00178	0.317	GFDGLDLDWEYPGSR	Y	G	0.95	5.4	0.505	0	0	40	0	0	1	1726.77	131	145
Male	Acidic mammalian chitinase	IPI00346516	51986.8	1	23	26	373	0.00178	0.317	GGISNIQAGYEIPELSK	A	Y	0.95	5.33	0.408	0	0	3	0	0	1	1775.92	186	202
Male	Acidic mammalian chitinase	IPI00346516	51986.8	1	23	26	373	0.00178	0.317	GKFPLTSTLNK	Q	A	0.95	3.42	0.317	0	0	2	0	0	1	1205.69	375	385
Male	Acidic mammalian chitinase	IPI00346516	51986.8	1	23	26	373	0.00178	0.317	IQAGYEIPELSK	N	Y	0.95	4.2	0.328	0	0	5	0	0	1	1347.72	191	202
Male	Acidic mammalian chitinase	IPI00346516	51986.8	1	23	26	373	0.00178	0.317	IWAIDLDDFTGSFCDQGK	M	F	0.95	6.77	0.609	0	0	22	0	0	1	2087.94	359	376
Male	Acidic mammalian chitinase	IPI00346516	51986.8	1	23	26	373	0.00178	0.317	LIVGFPEYGHT	K	F	0.95	3.11	0.299	0	0	3	0	0	1	1232.63	260	270
Male	Acidic mammalian chitinase	IPI00346516	51986.8	1	23	26	373	0.00178	0.317	LIVGFPEYGHTF	K	I	0.95	3.98	0.409	0	8	107	0	0	1	1379.7	260	271
Male	Acidic mammalian chitinase	IPI00346516	51986.8	1	23	26	373	0.00178	0.317	NIQAGYEIPELSK	S	Y	0.95	4.84	0.354	0	0	4	0	0	1	1461.76	190	202
Male	Acidic mammalian chitinase	IPI00346516	51986.8	1	23	26	373	0.00178	0.317	PGLGSFKPDDINPCLCTHLIY	R	A	0.95	4.87	0.385	0	0	2	0	0	0	2417.16	36	56
Male	Acidic mammalian chitinase	IPI00346516	51986.8	1	23	26	373	0.00178	0.317	QYGFDGLDLDWEYPGSR	R	G	0.95	5.36	0.471	5.74	0	50	4	0	2	2017.89	129	145
Male	Acidic mammalian chitinase	IPI00346516	51986.8	1	23	26	373	0.00178	0.317	QYGFDGLDLDWEYPGSRG	R	S	0.95	4.68	0.249	0	0	2	0	0	1	2074.91	129	146
Male	Acidic mammalian chitinase	IPI00346516	51986.8	1	23	26	373	0.00178	0.317	RPGLGSFK	Y	P	0.95	3.12	0.217	0	0	2	0	0	0	861.495	35	42
Male	Acidic mammalian chitinase	IPI00346516	51986.8	1	23	26	373	0.00178	0.317	SGATEVWDASQEVPY	R	A	0.95	3.3	0.216	0	0	1	0	0	1	1638.73	312	326
Male	Acidic mammalian chitinase	IPI00346516	51986.8	1	23	26	373	0.00178	0.317	VAGGISNIQAGYEIPELSK	A	Y	0.95	5.25	0.512	0	0	12	0	0	1	1946.02	184	202
Male	Acidic mammalian chitinase	IPI00346516	51986.8	1	23	26	373	0.00178	0.317	YGFDGLDLDWEYPGSR	Q	G	0.95	5.42	0.503	0	0	3	0	0	1	1889.83	130	145
Male	Acidic mammalian chitinase	IPI00346516	51986.8	1	23	26	373	0.00178	0.317	YLDFIHVM	K	T	0.95	3.41	0.437	0	0	12	0	0	1	1037.51	203	210
Male	Acidic mammalian chitinase	IPI00346516	51986.8	1	23	26	373	0.00178	0.317	YLDFIHVMTY	K	D	0.95	3.3	0.357	0	0	2	0	0	1	1301.62	203	212
Male	Acidic mammalian chitinase	IPI00346516	51986.8	1	27	38	606	0.00283	0.366	AAVAGGISNIQAGYEIPELSK	T	Y	0.95	5.64	0.486	0	0	2	0	0	1	2088.1	182	202
Male	Acidic mammalian chitinase	IPI00346516	51986.8	1	27	38	606	0.00283	0.366	ADGLYPVADDR	K	N	0.95	3.97	0.373	6	0	38	0	0	2	1191.56	431	441
Male	Acidic mammalian chitinase	IPI00346516	51986.8	1	27	38	606	0.00283	0.366	AIDLDDFTGSFCDQGK	W	F	0.95	5.88	0.5	0	0	22	0	0	1	1788.78	361	376
Male	Acidic mammalian chitinase	IPI00346516	51986.8	1	27	38	606	0.00283	0.366	AVAGGISNIQAGYEIPELSK	A	Y	0.95	5.83	0.441	0	0	9	3	0	1	2017.06	183	202
Male	Acidic mammalian chitinase	IPI00346516	51986.8	1	27	38	606	0.00283	0.366	DGLDLDWEYPGSR	F	G	0.95	2.69	0.293	0	0	1	0	0	1	1522.68	133	145
Male	Acidic mammalian chitinase	IPI00346516	51986.8	1	27	38	606	0.00283	0.366	DLDWEYPGSR	L	G	0.95	3.09	0.285	0	0	1	0	0	1	1237.55	136	145
Male	Acidic mammalian chitinase	IPI00346516	51986.8	1	27	38	606	0.00283	0.366	DLHGSWEGYTGENSPLYK	Y	Y	0.95	6.1	0.548	0	0	2	0	0	1	2052.93	213	230
Male	Acidic mammalian chitinase	IPI00346516	51986.8	1	27	38	606	0.00283	0.366	EAFEQEAIESNRPR	R	L	0.95	0	0	4.42	0	10	3	0	2	1657.79	164	177
Male	Acidic mammalian chitinase	IPI00346516	51986.8	1	27	38	606	0.00283	0.366	FDGLDLDWEYPGSR	G	G	0.95	5.57	0.426	0	0	1	0	0	1	1669.75	132	145
Male	Acidic mammalian chitinase	IPI00346516	51986.8	1	27	38	606	0.00283	0.366	FPLTSTLNK	K	A	0.95	3.03	0.223	3.8	6	13	0	0	2	1020.57	377	385
Male	Acidic mammalian chitinase	IPI00346516	51986.8	1	27	38	606	0.00283	0.366	GFDGLDLDWEYPGSR	Y	G	0.95	5.29	0.512	0	0	58	2	0	1	1726.77	131	145
Male	Acidic mammalian chitinase	IPI00346516	51986.8	1	27	38	606	0.00283	0.366	GGISNIQAGYEIPELSK	A	Y	0.95	6.14	0.403	0	0	3	0	0	1	1775.92	186	202
Male	Acidic mammalian chitinase	IPI00346516	51986.8	1	27	38	606	0.00283	0.366	IWAIDLDDFTGSFCDQGK	M	F	0.95	6.86	0.548	0	0	80	4	0	1	2087.94	359	376
Male	Acidic mammalian chitinase	IPI00346516	51986.8	1	27	38	606	0.00283	0.366	LIVGFPEYGHTF	K	I	0.95	4.05	0.389	0	13	106	0	0	1	1379.7	260	271
Male	Acidic mammalian chitinase	IPI00346516	51986.8	1	27	38	606	0.00283	0.366	NIQAGYEIPELSK	S	Y	0.95	4.79	0.39	0	0	2	0	0	1	1461.76	190	202
Male	Acidic mammalian chitinase	IPI00346516	51986.8	1	27	38	606	0.00283	0.366	NSKLKTLLAIGGWNFGTAPF	R	T	0.95	5.51	0.451	0	0	3	0	0	1	2135.17	87	106
Male	Acidic mammalian chitinase	IPI00346516	51986.8	1	27	38	606	0.00283	0.366	PGLGSFKPDDINPCLCTHLIY	R	A	0.95	4.96	0.376	0	0	2	1	0	0	2417.16	36	56
Male	Acidic mammalian chitinase	IPI00346516	51986.8	1	27	38	606	0.00283	0.366	QYGFDGLDLDWEYPGSR	R	G	0.95	0	0	8.48	0	136	4	0	2	2000.87	129	145
Male	Acidic mammalian chitinase	IPI00346516	51986.8	1	27	38	606	0.00283	0.366	QYGFDGLDLDWEYPGSRG	R	S	0.95	4.83	0.436	0	0	3	0	0	1	2074.91	129	146
Male	Acidic mammalian chitinase	IPI00346516	51986.8	1	27	38	606	0.00283	0.366	RPGLGSFK	Y	P	0.95	2.85	0.225	0	0	1	0	0	0	861.495	35	42
Male	Acidic mammalian chitinase	IPI00346516	51986.8	1	27	38	606	0.00283	0.366	TLLAIGGWNF	K	G	0.95	3.51	0.364	0	4	3	0	0	1	1091.59	92	101
Male	Acidic mammalian chitinase	IPI00346516	51986.8	1	27	38	606	0.00283	0.366	VAGGISNIQAGYEIPELSK	A	Y	0.95	6.36	0.436	0	0	14	3	0	1	1946.02	184	202
Male	Acidic mammalian chitinase	IPI00346516	51986.8	1	27	38	606	0.00283	0.366	WEGYTGENSPLYK	S	Y	0.95	4.58	0.429	0	0	2	0	0	1	1543.71	218	230
Male	Acidic mammalian chitinase	IPI00346516	51986.8	1	27	38	606	0.00283	0.366	YGFDGLDLDWEYPGSR	Q	G	0.95	5.82	0.519	0	0	3	0	0	1	1889.83	130	145
Male	Acidic mammalian chitinase	IPI00346516	51986.8	1	27	38	606	0.00283	0.366	YLDFIHV	K	M	0.95	2.51	0.34	0	1	1	0	0	1	906.473	203	209
Male	Acidic mammalian chitinase	IPI00346516	51986.8	1	27	38	606	0.00283	0.366	YLDFIHVM	K	T	0.95	3.43	0.416	0	0	24	0	0	1	1037.51	203	210
Male	Acidic mammalian chitinase	IPI00346516	51986.8	1	27	38	606	0.00283	0.366	YLDFIHVMTY	K	D	0.95	3.77	0.48	0	0	22	0	0	1	1301.62	203	212
Male	Acidic mammalian chitinase	IPI00346516	51986.8	1	39	48	866	0.0044	0.715	ADGLYPVADDR	K	N	0.95	3.38	0.278	4.3	2	5	0	0	2	1191.56	431	441
Male	Acidic mammalian chitinase	IPI00346516	51986.8	1	39	48	866	0.0044	0.715	AGMQNNEITTIEWNDVTLYK	F	A	0.95	6.21	0.431	0	0	4	0	0	1	2340.12	59	78
Male	Acidic mammalian chitinase	IPI00346516	51986.8	1	39	48	866	0.0044	0.715	ANEWLGYDNIK	K	S	0.95	3.95	0.329	4.47	6	5	0	0	2	1322.64	330	340
Male	Acidic mammalian chitinase	IPI00346516	51986.8	1	39	48	866	0.0044	0.715	AYYEICTFLR	W	S	0.95	3.5	0.327	0	0	1	0	0	1	1335.64	302	311
Male	Acidic mammalian chitinase	IPI00346516	51986.8	1	39	48	866	0.0044	0.715	DLHGSWEGYTGENSPLYK	Y	Y	0.95	6.27	0.508	0	0	21	3	0	1	2052.93	213	230
Male	Acidic mammalian chitinase	IPI00346516	51986.8	1	39	48	866	0.0044	0.715	EAFEQEAIESNRPR	R	L	0.95	2.9	0.165	1.89	0	11	0	0	2	1675.8	164	177
Male	Acidic mammalian chitinase	IPI00346516	51986.8	1	39	48	866	0.0044	0.715	EITTIEWNDVTLYK	N	A	0.95	3.98	0.481	0	0	2	0	0	1	1724.87	65	78
Male	Acidic mammalian chitinase	IPI00346516	51986.8	1	39	48	866	0.0044	0.715	FEQEAIESNRPR	A	L	0.95	2.99	0.182	0	0	1	0	0	1	1475.72	166	177
Male	Acidic mammalian chitinase	IPI00346516	51986.8	1	39	48	866	0.0044	0.715	FPLTSTLNK	K	A	0.95	3.23	0.246	1.54	5	5	0	0	2	1020.57	377	385
Male	Acidic mammalian chitinase	IPI00346516	51986.8	1	39	48	866	0.0044	0.715	FTNWAQYR	Y	P	0.95	3.23	0.273	0	0	4	0	0	0	1085.52	28	35
Male	Acidic mammalian chitinase	IPI00346516	51986.8	1	39	48	866	0.0044	0.715	GGAMIWAIDLDDFTGSFCDQGK	F	F	0.95	6.95	0.537	0	0	51	0	0	1	2404.06	355	376
Male	Acidic mammalian chitinase	IPI00346516	51986.8	1	39	48	866	0.0044	0.715	HLFTVLVK	K	E	0.95	3.02	0.279	3.13	72	67	0	0	2	956.593	153	160
Male	Acidic mammalian chitinase	IPI00346516	51986.8	1	39	48	866	0.0044	0.715	IVGFPEYGHTFILR	L	N	0.95	4.11	0.426	0	0	6	0	0	1	1648.89	261	274
Male	Acidic mammalian chitinase	IPI00346516	51986.8	1	39	48	866	0.0044	0.715	IWAIDLDDFTGSFCDQGK	M	F	0.95	6.72	0.555	0	0	20	0	0	1	2087.94	359	376
Male	Acidic mammalian chitinase	IPI00346516	51986.8	1	39	48	866	0.0044	0.715	KANEWLGYDNIK	Y	S	0.95	4.93	0.353	0	0	8	0	0	1	1450.73	329	340
Male	Acidic mammalian chitinase	IPI00346516	51986.8	1	39	48	866	0.0044	0.715	LIVGFPEYGHTF	K	I	0.95	3.69	0.378	0	5	7	0	0	1	1379.7	260	271
Male	Acidic mammalian chitinase	IPI00346516	51986.8	1	39	48	866	0.0044	0.715	LIVGFPEYGHTFILR	K	N	0.95	4.15	0.407	8.08	0	32	0	0	2	1761.97	260	274
Male	Acidic mammalian chitinase	IPI00346516	51986.8	1	39	48	866	0.0044	0.715	LMVTAAVAGGISNIQAGYEIPELSK	R	Y	0.95	5	0.449	4.89	0	8	6	0	2	2532.34	178	202
Male	Acidic mammalian chitinase	IPI00346516	51986.8	1	39	48	866	0.0044	0.715	NAFWQCINGITYQQH	R	C	0.95	6.08	0.402	0	0	2	0	0	1	1879.86	442	456
Male	Acidic mammalian chitinase	IPI00346516	51986.8	1	39	48	866	0.0044	0.715	NLICYFTNWAQYR	Y	P	0.95	5.48	0.377	0	0	5	0	0	0	1748.82	23	35
Male	Acidic mammalian chitinase	IPI00346516	51986.8	1	39	48	866	0.0044	0.715	NPSDNGIGAPTSGDGPAGPYTR	R	Q	0.95	6.35	0.58	15.2	0	20	0	0	2	2100.96	275	296
Male	Acidic mammalian chitinase	IPI00346516	51986.8	1	39	48	866	0.0044	0.715	PGLGSFKPDDINPCLCTHLIY	R	A	0.95	4.86	0.371	0	0	2	0	0	0	2417.16	36	56
Male	Acidic mammalian chitinase	IPI00346516	51986.8	1	39	48	866	0.0044	0.715	PGLGSFKPDDINPCLCTHLIYAF	R	A	0.95	4.59	0.35	0	0	6	0	0	0	2635.27	36	58
Male	Acidic mammalian chitinase	IPI00346516	51986.8	1	39	48	866	0.0044	0.715	QAGFWAYYEICTFLR	R	S	0.95	5.04	0.446	8.41	0	21	0	0	2	1924.91	297	311
Male	Acidic mammalian chitinase	IPI00346516	51986.8	1	39	48	866	0.0044	0.715	QNNFGGAMIWAIDLDDFTGSFCDQGK	K	F	0.95	0	0	6.44	0	0	2	0	2	2907.27	351	376
Male	Acidic mammalian chitinase	IPI00346516	51986.8	1	39	48	866	0.0044	0.715	QYGFDGLDLDWEYPGSR	R	G	0.95	0	0	8.52	0	321	0	0	2	2000.87	129	145
Male	Acidic mammalian chitinase	IPI00346516	51986.8	1	39	48	866	0.0044	0.715	QYGFDGLDLDWEYPGSRG	R	S	0.95	4.08	0.265	0	0	2	0	0	1	2074.91	129	146
Male	Acidic mammalian chitinase	IPI00346516	51986.8	1	39	48	866	0.0044	0.715	SGATEVWDASQEVPY	R	A	0.95	3.66	0.401	0	0	4	0	0	1	1638.73	312	326
Male	Acidic mammalian chitinase	IPI00346516	51986.8	1	39	48	866	0.0044	0.715	SGATEVWDASQEVPYAYK	R	A	0.95	6.11	0.507	11.1	0	4	0	0	2	2000.92	312	329
Male	Acidic mammalian chitinase	IPI00346516	51986.8	1	39	48	866	0.0044	0.715	TLLAIGGWNF	K	G	0.95	3.43	0.358	0	4	0	0	0	1	1091.59	92	101
Male	Acidic mammalian chitinase	IPI00346516	51986.8	1	39	48	866	0.0044	0.715	TLLAIGGWNFGTAPF	K	T	0.95	5.01	0.453	0	0	4	0	0	1	1564.82	92	106
Male	Acidic mammalian chitinase	IPI00346516	51986.8	1	39	48	866	0.0044	0.715	TLLAIGGWNFGTAPFTTMVSTSQNR	K	Q	0.95	5.89	0.528	5.37	0	15	13	0	2	2670.34	92	116
Male	Acidic mammalian chitinase	IPI00346516	51986.8	1	39	48	866	0.0044	0.715	TYDLHGSWEGYTGENSPLYK	M	Y	0.95	5.98	0.544	0	0	13	10	0	1	2317.04	211	230
Male	Acidic mammalian chitinase	IPI00346516	51986.8	1	39	48	866	0.0044	0.715	WAYYEICTFLR	F	S	0.95	4.49	0.407	0	0	2	0	0	1	1521.72	301	311
Male	Acidic mammalian chitinase	IPI00346516	51986.8	1	39	48	866	0.0044	0.715	YGFDGLDLDWEYPGSR	Q	G	0.95	5.49	0.454	0	0	1	0	0	1	1889.83	130	145
Male	Acidic mammalian chitinase	IPI00346516	51986.8	1	39	48	866	0.0044	0.715	YLDFIHVMTY	K	D	0.95	3.52	0.455	0	0	2	0	0	1	1301.62	203	212
Male	Acidic mammalian chitinase	IPI00346516	51986.8	1	39	48	866	0.0044	0.715	YLDFIHVMTYDLHGSWEGYTGENSPLYK	K	Y	0.95	7.71	0.614	7.55	0	0	12	0	2	3335.54	203	230
Male	Acidic mammalian chitinase	IPI00346516	51986.8	1	39	48	866	0.0044	0.715	YNLICYFTNWAQYR	A	P	0.95	4.82	0.53	0	0	30	0	0	0	1911.89	22	35
Male	Acidic mammalian chitinase	IPI00346516	51986.8	1	39	48	866	0.0044	0.715	YPTETGSNAYLNVDYVMNYWK	K	N	0.95	6.78	0.523	7.54	0	14	0	0	2	2528.14	231	251
Female	Alpha-amylase 1	IPI00315893	57606.1	1	47	60	516	0.00251	0.636	AEDPFIAIHAESK	S	-	0.95	4.02	0.408	0	0	1	0	0	1	1427.72	498	510
Female	Alpha-amylase 1	IPI00315893	57606.1	1	47	60	516	0.00251	0.636	AGVQVSPPNENIVVHSPSRPWWER	F	Y	0.95	3.79	0.392	0	0	3	0	0	1	2741.39	53	76
Female	Alpha-amylase 1	IPI00315893	57606.1	1	47	60	516	0.00251	0.636	AHFSISNSAEDPFIAIHAESK	K	-	0.95	0	0	3.8	0	0	1	0	2	2271.1	490	510
Female	Alpha-amylase 1	IPI00315893	57606.1	1	47	60	516	0.00251	0.636	ALVFVDNHDNQR	R	G	0.95	4.01	0.352	6.55	0	7	0	0	2	1427.7	307	318	IPI00133544
Female	Alpha-amylase 1	IPI00315893	57606.1	1	47	60	516	0.00251	0.636	ANWWDNDSNQVAFGR	F	G	0.95	4.98	0.421	0	0	27	3	0	1	1779.78	422	436
Female	Alpha-amylase 1	IPI00315893	57606.1	1	47	60	516	0.00251	0.636	CDVISGDKVDGNCTGIK	Y	V	0.95	6.01	0.417	0	0	7	0	0	1	1837.84	465	481
Female	Alpha-amylase 1	IPI00315893	57606.1	1	47	60	516	0.00251	0.636	CNNVGVR	R	I	0.95	2.25	0.134	2.25	3	0	0	0	2	818.394	101	107	IPI00133544
Female	Alpha-amylase 1	IPI00315893	57606.1	1	47	60	516	0.00251	0.636	DVNDWVGPPNNNGK	K	T	0.95	3.57	0.275	3.52	0	1	0	0	2	1525.7	368	381
Female	Alpha-amylase 1	IPI00315893	57606.1	1	47	60	516	0.00251	0.636	EVSINPDSTCGNDWICEHR	K	W	0.95	0	0	7.6	0	24	1	0	2	2270.96	384	402
Female	Alpha-amylase 1	IPI00315893	57606.1	1	47	60	516	0.00251	0.636	GHGAGGASIL	R	T	0.949	2.42	0.361	0	1	0	0	0	1	839.438	319	328
Female	Alpha-amylase 1	IPI00315893	57606.1	1	47	60	516	0.00251	0.636	HMWPGDIK	K	A	0.95	2.95	0.232	1.2	6	20	0	0	2	983.477	216	223
Female	Alpha-amylase 1	IPI00315893	57606.1	1	47	60	516	0.00251	0.636	IFQEVIDLGGEAVSSNEYFGNGR	F	V	0.95	4.57	0.323	0	0	1	3	0	1	2501.19	245	267
Female	Alpha-amylase 1	IPI00315893	57606.1	1	47	60	516	0.00251	0.636	IVVHSPSRPWWER	N	Y	0.95	3.13	0.206	0	0	6	0	0	1	1648.87	64	76
Female	Alpha-amylase 1	IPI00315893	57606.1	1	47	60	516	0.00251	0.636	IYVDAVINHMCGVGAQAGQSSTCGSYF	R	N	0.95	6.93	0.536	0	0	1	1	0	1	2892.28	108	134
Female	Alpha-amylase 1	IPI00315893	57606.1	1	47	60	516	0.00251	0.636	IYVDAVINHMCGVGAQAGQSSTCGSYFN	R	P	0.95	3.56	0.16	0	0	0	1	0	1	2892.28	108	135
Female	Alpha-amylase 1	IPI00315893	57606.1	1	47	60	516	0.00251	0.636	LSGLLDLALEK	R	D	0.95	4.39	0.283	5.57	4	31	0	0	2	1171.69	177	187
Female	Alpha-amylase 1	IPI00315893	57606.1	1	47	60	516	0.00251	0.636	LSGLLDLALEKDY	R	V	0.95	5.06	0.412	0	0	2	0	0	1	1449.78	177	189
Female	Alpha-amylase 1	IPI00315893	57606.1	1	47	60	516	0.00251	0.636	LSGLLDLALEKDYVR	R	T	0.95	4.6	0.358	6.34	0	2	1	0	2	1704.95	177	191
Female	Alpha-amylase 1	IPI00315893	57606.1	1	47	60	516	0.00251	0.636	NFQNGKDVNDWVGPPNNNGK	R	T	0.95	4.1	0.267	0	0	1	0	0	2	2214.03	362	381
Female	Alpha-amylase 1	IPI00315893	57606.1	1	47	60	516	0.00251	0.636	NMVAFR	R	N	0.95	2.24	0.125	1.62	15	0	0	0	2	737.377	408	413	IPI00133544
Female	Alpha-amylase 1	IPI00315893	57606.1	1	47	60	516	0.00251	0.636	NPDSTCGNDWICEHR	I	W	0.95	5.07	0.549	0	0	4	0	0	1	1860.74	388	402
Female	Alpha-amylase 1	IPI00315893	57606.1	1	47	60	516	0.00251	0.636	NSAEDPFIAIHAESK	S	-	0.95	5.49	0.479	0	0	13	0	0	1	1628.79	496	510
Female	Alpha-amylase 1	IPI00315893	57606.1	1	47	60	516	0.00251	0.636	NWGEGWGLMPSDR	K	A	0.95	4.12	0.419	6.92	0	3	0	0	2	1504.66	294	306
Female	Alpha-amylase 1	IPI00315893	57606.1	1	47	60	516	0.00251	0.636	NWWDNDSNQVAFGR	A	G	0.95	4.98	0.429	0	0	2	0	0	1	1708.75	423	436
Female	Alpha-amylase 1	IPI00315893	57606.1	1	47	60	516	0.00251	0.636	PDSTCGNDWICEHR	N	W	0.95	4.54	0.557	0	0	8	2	0	1	1746.7	389	402
Female	Alpha-amylase 1	IPI00315893	57606.1	1	47	60	516	0.00251	0.636	PPNENIVVHSPSRPWWER	S	Y	0.95	3.72	0.392	0	0	0	1	0	1	2200.11	59	76
Female	Alpha-amylase 1	IPI00315893	57606.1	1	47	60	516	0.00251	0.636	SAEDPFIAIHAESK	N	-	0.95	4.53	0.316	0	0	3	0	0	1	1514.75	497	510
Female	Alpha-amylase 1	IPI00315893	57606.1	1	47	60	516	0.00251	0.636	SGFDFNDGK	Y	C	0.95	2.74	0.319	0	13	41	0	0	1	986.422	147	155
Female	Alpha-amylase 1	IPI00315893	57606.1	1	47	60	516	0.00251	0.636	SGLLDLALEK	L	D	0.95	3.94	0.294	0	0	3	0	0	1	1058.61	178	187
Female	Alpha-amylase 1	IPI00315893	57606.1	1	47	60	516	0.00251	0.636	SGNEDEFR	R	D	0.95	2.7	0.208	4.4	9	54	0	0	2	953.396	88	95	IPI00133544
Female	Alpha-amylase 1	IPI00315893	57606.1	1	47	60	516	0.00251	0.636	SGNEDEFRDMVNR	R	C	0.95	2.84	0.123	2.77	0	1	0	0	2	1568.68	88	100
Female	Alpha-amylase 1	IPI00315893	57606.1	1	47	60	516	0.00251	0.636	SINPDSTCGNDWICEHR	V	W	0.95	4.6	0.514	0	0	3	0	0	1	2060.86	386	402
Female	Alpha-amylase 1	IPI00315893	57606.1	1	47	60	516	0.00251	0.636	SISNSAEDPFIAIHAESK	F	-	0.95	6.28	0.514	0	0	35	0	0	1	1915.94	493	510
Female	Alpha-amylase 1	IPI00315893	57606.1	1	47	60	516	0.00251	0.636	SISNSAEDPFIAIHAESKI	F	-	0.95	4.2	0.194	0	0	2	0	0	1	2029.02	493	511
Female	Alpha-amylase 1	IPI00315893	57606.1	1	47	60	516	0.00251	0.636	SNSAEDPFIAIHAESK	I	-	0.95	5.63	0.44	0	0	7	0	0	1	1715.82	495	510
Female	Alpha-amylase 1	IPI00315893	57606.1	1	47	60	516	0.00251	0.636	SPSRPWWER	H	Y	0.95	2.96	0.21	0	0	3	0	0	1	1200.59	68	76
Female	Alpha-amylase 1	IPI00315893	57606.1	1	47	60	516	0.00251	0.636	SQGSRPFIFQEVIDLGGEAVSSNEYFGNGR	F	V	0.95	4.62	0.4	0	0	0	2	0	1	3260.56	238	267
Female	Alpha-amylase 1	IPI00315893	57606.1	1	47	60	516	0.00251	0.636	STCGNDWICEHR	D	W	0.95	3.8	0.362	0	0	1	0	0	1	1534.62	391	402
Female	Alpha-amylase 1	IPI00315893	57606.1	1	47	60	516	0.00251	0.636	TASGGIENYQDAAQVR	R	D	0.95	6.62	0.429	5.48	0	27	3	0	2	1679.8	158	173
Female	Alpha-amylase 1	IPI00315893	57606.1	1	47	60	516	0.00251	0.636	TKEVSINPDSTCGNDWICEHR	K	W	0.95	6.19	0.541	4.8	0	4	14	0	2	2518.11	382	402
Female	Alpha-amylase 1	IPI00315893	57606.1	1	47	60	516	0.00251	0.636	VADYMNHLIDIGVAGFR	K	L	0.95	5.48	0.476	6.54	0	38	21	0	2	1890.95	194	210	IPI00133544
Female	Alpha-amylase 1	IPI00315893	57606.1	1	47	60	516	0.00251	0.636	VDGNCTGIK	K	V	0.95	2.73	0.196	2.59	0	3	0	0	2	963.457	473	481
Female	Alpha-amylase 1	IPI00315893	57606.1	1	47	60	516	0.00251	0.636	VYVGNDGK	K	A	0.95	2.48	0.232	3.17	5	0	0	0	2	851.426	482	489
Female	Alpha-amylase 1	IPI00315893	57606.1	1	47	60	516	0.00251	0.636	YLAPNGFAGVQVSPPNENIVVH	R	S	0.95	4.51	0.422	0	0	2	0	0	1	2322.19	46	67
Female	Alpha-amylase 1	IPI00315893	57606.1	1	47	60	516	0.00251	0.636	YLAPNGFAGVQVSPPNENIVVHSPS	R	R	0.95	4.6	0.419	0	0	3	0	0	1	2593.3	46	70
Female	Alpha-amylase 1	IPI00315893	57606.1	1	47	60	516	0.00251	0.636	YLAPNGFAGVQVSPPNENIVVHSPSR	R	P	0.95	4.22	0.524	0	0	3	0	0	1	2749.41	46	71
Female	Alpha-amylase 1	IPI00315893	57606.1	1	47	60	516	0.00251	0.636	YQPISYK	R	I	0.95	2.3	0.2	3.17	9	0	0	0	2	898.467	77	83	IPI00133544
Female	Alpha-amylase 1	IPI00315893	57606.1	1	32	44	479	0.00234	0.544	AGVQVSPPNENIVVHSPSRPWWER	F	Y	0.95	3.93	0.409	0	0	5	0	0	1	2741.39	53	76
Female	Alpha-amylase 1	IPI00315893	57606.1	1	32	44	479	0.00234	0.544	ALVFVDNHDNQR	R	G	0.95	4.04	0.319	7.06	0	11	0	0	2	1427.7	307	318	IPI00133544
Female	Alpha-amylase 1	IPI00315893	57606.1	1	32	44	479	0.00234	0.544	ANWWDNDSNQVAFGR	F	G	0.95	4.87	0.476	0	0	36	4	0	1	1779.78	422	436
Female	Alpha-amylase 1	IPI00315893	57606.1	1	32	44	479	0.00234	0.544	CDVISGDKVDGNCTGIK	Y	V	0.95	5.81	0.449	0	0	10	0	0	1	1837.84	465	481
Female	Alpha-amylase 1	IPI00315893	57606.1	1	32	44	479	0.00234	0.544	CNNVGVR	R	I	0.95	2.28	0.0806	2	3	0	0	0	2	818.394	101	107	IPI00133544
Female	Alpha-amylase 1	IPI00315893	57606.1	1	32	44	479	0.00234	0.544	DNDSNQVAFGR	W	G	0.95	3.45	0.119	0	0	1	0	0	1	1222.55	426	436
Female	Alpha-amylase 1	IPI00315893	57606.1	1	32	44	479	0.00234	0.544	DVNDWVGPPNNNGK	K	T	0.95	5.23	0.326	2.57	0	3	0	0	2	1525.7	368	381
Female	Alpha-amylase 1	IPI00315893	57606.1	1	32	44	479	0.00234	0.544	EVSINPDSTCGNDWICEHR	K	W	0.95	0	0	7.3	0	26	6	0	2	2288.97	384	402
Female	Alpha-amylase 1	IPI00315893	57606.1	1	32	44	479	0.00234	0.544	GHGAGGASIL	R	T	0.95	2.35	0.351	0	1	0	0	0	1	839.438	319	328
Female	Alpha-amylase 1	IPI00315893	57606.1	1	32	44	479	0.00234	0.544	HMWPGDIK	K	A	0.95	3.28	0.218	1.72	8	27	0	0	2	983.477	216	223
Female	Alpha-amylase 1	IPI00315893	57606.1	1	32	44	479	0.00234	0.544	IVVHSPSRPWWER	N	Y	0.95	3.36	0.256	0	0	5	0	0	1	1648.87	64	76
Female	Alpha-amylase 1	IPI00315893	57606.1	1	32	44	479	0.00234	0.544	IYVDAVINHMCGVGAQAGQSSTCGSY	R	F	0.95	6.87	0.56	0	0	0	2	0	1	2745.21	108	133
Female	Alpha-amylase 1	IPI00315893	57606.1	1	32	44	479	0.00234	0.544	LSGLLDLALEK	R	D	0.95	0	0	5.77	6	49	0	0	2	1171.69	177	187
Female	Alpha-amylase 1	IPI00315893	57606.1	1	32	44	479	0.00234	0.544	LSGLLDLALEKDYVR	R	T	0.95	5.31	0.335	7.72	0	5	0	0	2	1704.95	177	191
Female	Alpha-amylase 1	IPI00315893	57606.1	1	32	44	479	0.00234	0.544	NMVAFR	R	N	0.95	2.3	0.141	1.34	8	0	0	0	2	737.377	408	413	IPI00133544
Female	Alpha-amylase 1	IPI00315893	57606.1	1	32	44	479	0.00234	0.544	NSAEDPFIAIHAESK	S	-	0.95	5.5	0.475	0	0	6	0	0	1	1628.79	496	510
Female	Alpha-amylase 1	IPI00315893	57606.1	1	32	44	479	0.00234	0.544	NWGEGWGLMPSDR	K	A	0.95	3.4	0.294	4.06	0	5	0	0	2	1504.66	294	306
Female	Alpha-amylase 1	IPI00315893	57606.1	1	32	44	479	0.00234	0.544	NWWDNDSNQVAFGR	A	G	0.95	4.86	0.46	0	0	3	0	0	1	1708.75	423	436
Female	Alpha-amylase 1	IPI00315893	57606.1	1	32	44	479	0.00234	0.544	PDSTCGNDWICEHR	N	W	0.95	4.81	0.444	0	0	2	2	0	1	1746.7	389	402
Female	Alpha-amylase 1	IPI00315893	57606.1	1	32	44	479	0.00234	0.544	SGFDFNDGK	Y	C	0.95	3.15	0.338	0	5	35	0	0	1	986.422	147	155
Female	Alpha-amylase 1	IPI00315893	57606.1	1	32	44	479	0.00234	0.544	SGLLDLALEK	L	D	0.95	3.79	0.299	0	0	4	0	0	1	1058.61	178	187
Female	Alpha-amylase 1	IPI00315893	57606.1	1	32	44	479	0.00234	0.544	SGNEDEFR	R	D	0.95	3.11	0.351	4.6	11	24	0	0	2	953.396	88	95	IPI00133544
Female	Alpha-amylase 1	IPI00315893	57606.1	1	32	44	479	0.00234	0.544	SISNSAEDPFIAIHAESK	F	-	0.95	6.15	0.491	0	0	47	0	0	1	1915.94	493	510
Female	Alpha-amylase 1	IPI00315893	57606.1	1	32	44	479	0.00234	0.544	SPSRPWWER	H	Y	0.95	2.97	0.21	0	0	4	0	0	1	1200.59	68	76
Female	Alpha-amylase 1	IPI00315893	57606.1	1	32	44	479	0.00234	0.544	TASGGIENYQDAAQVR	R	D	0.95	0	0	11.4	0	40	0	0	2	1679.8	158	173
Female	Alpha-amylase 1	IPI00315893	57606.1	1	32	44	479	0.00234	0.544	TKEVSINPDSTCGNDWICEHR	K	W	0.95	7.09	0.516	6.54	0	5	14	0	2	2518.11	382	402
Female	Alpha-amylase 1	IPI00315893	57606.1	1	32	44	479	0.00234	0.544	VADYMNHLIDIGVAGFR	K	L	0.95	4.59	0.366	5.57	0	10	1	0	2	1890.95	194	210	IPI00133544
Female	Alpha-amylase 1	IPI00315893	57606.1	1	32	44	479	0.00234	0.544	VDGNCTGIK	K	V	0.95	2.6	0.201	3.8	1	5	0	0	2	963.457	473	481
Female	Alpha-amylase 1	IPI00315893	57606.1	1	32	44	479	0.00234	0.544	VYVGNDGK	K	A	0.95	2.78	0.238	0	13	0	0	0	2	851.426	482	489
Female	Alpha-amylase 1	IPI00315893	57606.1	1	32	44	479	0.00234	0.544	YLAPNGFAGVQVSPPNENIVVH	R	S	0.95	3.82	0.389	0	0	2	0	0	1	2322.19	46	67
Female	Alpha-amylase 1	IPI00315893	57606.1	1	32	44	479	0.00234	0.544	YLAPNGFAGVQVSPPNENIVVHSPS	R	R	0.95	4.86	0.351	0	0	4	1	0	1	2593.3	46	70
Female	Alpha-amylase 1	IPI00315893	57606.1	1	32	44	479	0.00234	0.544	YQPISYK	R	I	0.95	1.44	0.117	4.27	12	7	0	0	2	898.467	77	83	IPI00133544
Female	Alpha-amylase 1	IPI00315893	57606.1	1	45	58	2021	0.0125	0.638	AGVQVSPPNENIVVHSPSRPWWER	F	Y	0.95	4.15	0.42	0	0	17	0	0	1	2741.39	53	76
Female	Alpha-amylase 1	IPI00315893	57606.1	1	45	58	2021	0.0125	0.638	AHFSISNSAEDPFIAIHAESK	K	-	0.95	0	0	9.35	0	151	142	0	2	2271.1	490	510
Female	Alpha-amylase 1	IPI00315893	57606.1	1	45	58	2021	0.0125	0.638	ALVFVDNHDNQR	R	G	0.95	3.91	0.377	7.82	16	293	0	0	2	1427.7	307	318	IPI00133544
Female	Alpha-amylase 1	IPI00315893	57606.1	1	45	58	2021	0.0125	0.638	ANWWDNDSNQVAFGR	F	G	0.95	4.65	0.468	0	0	15	0	0	1	1779.78	422	436
Female	Alpha-amylase 1	IPI00315893	57606.1	1	45	58	2021	0.0125	0.638	DFPGVPYSGFDFNDGK	R	C	0.95	3.86	0.496	6.85	0	14	0	0	2	1761.78	140	155
Female	Alpha-amylase 1	IPI00315893	57606.1	1	45	58	2021	0.0125	0.638	DVNDWVGPPNNNGK	K	T	0.95	4.66	0.326	4.89	0	3	0	0	2	1525.7	368	381
Female	Alpha-amylase 1	IPI00315893	57606.1	1	45	58	2021	0.0125	0.638	ENIVVHSPSRPWWER	N	Y	0.95	3.84	0.198	0	0	1	0	0	1	1891.96	62	76
Female	Alpha-amylase 1	IPI00315893	57606.1	1	45	58	2021	0.0125	0.638	EVSINPDSTCGNDWICEHR	K	W	0.95	0	0	8.04	0	58	12	0	2	2288.97	384	402
Female	Alpha-amylase 1	IPI00315893	57606.1	1	45	58	2021	0.0125	0.638	FSISNSAEDPFIAIHAESK	H	-	0.95	3.87	0.589	0	0	1	0	0	1	2063.01	492	510
Female	Alpha-amylase 1	IPI00315893	57606.1	1	45	58	2021	0.0125	0.638	GFAGVQVSPPNENIVVHSPSRPWWER	N	Y	0.95	4.44	0.419	0	0	4	21	0	1	2945.48	51	76
Female	Alpha-amylase 1	IPI00315893	57606.1	1	45	58	2021	0.0125	0.638	GHGAGGASILTFWDAR	R	L	0.95	0	0	19.9	0	470	0	0	2	1615.8	319	334
Female	Alpha-amylase 1	IPI00315893	57606.1	1	45	58	2021	0.0125	0.638	HMWPGDIK	K	A	0.95	3.39	0.244	2.15	26	23	0	0	2	983.477	216	223
Female	Alpha-amylase 1	IPI00315893	57606.1	1	45	58	2021	0.0125	0.638	IFQEVIDLGGEAVSSNEYFGNGR	F	V	0.95	6.78	0.479	0	0	24	8	0	1	2501.19	245	267
Female	Alpha-amylase 1	IPI00315893	57606.1	1	45	58	2021	0.0125	0.638	IVVHSPSRPWWER	N	Y	0.95	3.49	0.267	0	0	16	0	0	1	1648.87	64	76
Female	Alpha-amylase 1	IPI00315893	57606.1	1	45	58	2021	0.0125	0.638	IYVDAVINHMCGVGAQAGQSSTCGSYFNPNNR	R	D	0.95	0	0	11.2	0	0	12	0	2	3487.56	108	139
Female	Alpha-amylase 1	IPI00315893	57606.1	1	45	58	2021	0.0125	0.638	LHNLNTK	K	W	0.95	2.4	0.0114	4.24	5	0	0	0	2	839.474	229	235	IPI00133544
Female	Alpha-amylase 1	IPI00315893	57606.1	1	45	58	2021	0.0125	0.638	LMPSDRALVFVDNHDNQR	G	G	0.95	4.06	0.219	0	0	0	14	0	1	2143.04	301	318
Female	Alpha-amylase 1	IPI00315893	57606.1	1	45	58	2021	0.0125	0.638	LSGLLDLALEK	R	D	0.95	4.29	0.269	4.25	2	6	0	0	2	1171.69	177	187
Female	Alpha-amylase 1	IPI00315893	57606.1	1	45	58	2021	0.0125	0.638	MAVGFMLAHPYGFTR	K	V	0.95	4.48	0.348	3.59	0	1	0	0	2	1713.82	338	352	IPI00133544
Female	Alpha-amylase 1	IPI00315893	57606.1	1	45	58	2021	0.0125	0.638	NFQNGKDVNDWVGPPNNNGK	R	T	0.95	4	0.218	0	0	1	0	0	2	2214.03	362	381
Female	Alpha-amylase 1	IPI00315893	57606.1	1	45	58	2021	0.0125	0.638	NMVAFR	R	N	0.95	2.33	0.162	1.54	6	0	0	0	2	737.377	408	413	IPI00133544
Female	Alpha-amylase 1	IPI00315893	57606.1	1	45	58	2021	0.0125	0.638	NPDSTCGNDWICEHR	I	W	0.95	5.25	0.558	0	0	4	0	0	1	1860.74	388	402
Female	Alpha-amylase 1	IPI00315893	57606.1	1	45	58	2021	0.0125	0.638	NVVNGQPFANWWDNDSNQVAF	R	G	0.95	4.81	0.482	0	0	4	0	0	1	2422.09	414	434
Female	Alpha-amylase 1	IPI00315893	57606.1	1	45	58	2021	0.0125	0.638	NVVNGQPFANWWDNDSNQVAFGR	R	G	0.95	5.78	0.557	3.57	0	26	9	0	2	2635.21	414	436
Female	Alpha-amylase 1	IPI00315893	57606.1	1	45	58	2021	0.0125	0.638	NWGEGWGLMPSDR	K	A	0.95	0	0	7.46	0	11	0	0	2	1504.66	294	306
Female	Alpha-amylase 1	IPI00315893	57606.1	1	45	58	2021	0.0125	0.638	NWWDNDSNQVAFGR	A	G	0.95	4.98	0.375	0	0	1	0	0	1	1708.75	423	436
Female	Alpha-amylase 1	IPI00315893	57606.1	1	45	58	2021	0.0125	0.638	PDSTCGNDWICEHR	N	W	0.95	4.08	0.539	0	0	10	0	0	1	1746.7	389	402
Female	Alpha-amylase 1	IPI00315893	57606.1	1	45	58	2021	0.0125	0.638	PFIFQEVIDLGGEAVSSNEYFGNGR	R	V	0.95	7.95	0.56	0	0	109	314	0	1	2745.32	243	267
Female	Alpha-amylase 1	IPI00315893	57606.1	1	45	58	2021	0.0125	0.638	PGVPYSGFDFNDGK	F	C	0.95	4.91	0.501	0	0	6	0	0	1	1499.68	142	155
Female	Alpha-amylase 1	IPI00315893	57606.1	1	45	58	2021	0.0125	0.638	PNGFAGVQVSPPNENIVVHSPSRPWWER	A	Y	0.95	3.78	0.268	0	0	0	4	0	1	3156.58	49	76
Female	Alpha-amylase 1	IPI00315893	57606.1	1	45	58	2021	0.0125	0.638	PPNENIVVHSPSR	S	P	0.95	3.64	0.431	0	1	0	0	0	0	1445.75	59	71
Female	Alpha-amylase 1	IPI00315893	57606.1	1	45	58	2021	0.0125	0.638	PPNENIVVHSPSRPWWER	S	Y	0.95	4.87	0.399	0	0	24	0	0	1	2200.11	59	76
Female	Alpha-amylase 1	IPI00315893	57606.1	1	45	58	2021	0.0125	0.638	SGFDFNDGK	Y	C	0.95	2.98	0.258	0	2	1	0	0	1	986.422	147	155
Female	Alpha-amylase 1	IPI00315893	57606.1	1	45	58	2021	0.0125	0.638	SINPDSTCGNDWICEHR	V	W	0.95	5.06	0.482	0	0	2	0	0	1	2060.86	386	402
Female	Alpha-amylase 1	IPI00315893	57606.1	1	45	58	2021	0.0125	0.638	SISNSAEDPFIAIHAESK	F	-	0.95	5.9	0.485	0	0	5	0	0	1	1915.94	493	510
Female	Alpha-amylase 1	IPI00315893	57606.1	1	45	58	2021	0.0125	0.638	SPPNENIVVHSPSRPWWER	V	Y	0.95	3.18	0.34	0	0	1	0	0	1	2287.14	58	76
Female	Alpha-amylase 1	IPI00315893	57606.1	1	45	58	2021	0.0125	0.638	SPSRPWWER	H	Y	0.95	2.88	0.196	0	0	1	0	0	1	1200.59	68	76
Female	Alpha-amylase 1	IPI00315893	57606.1	1	45	58	2021	0.0125	0.638	TASGGIENYQDAAQVR	R	D	0.95	5.85	0.371	11.6	0	12	0	0	2	1679.8	158	173
Female	Alpha-amylase 1	IPI00315893	57606.1	1	45	58	2021	0.0125	0.638	TKEVSINPDSTCGNDWICEHR	K	W	0.95	0	0	6.89	0	1	3	0	2	2518.11	382	402
Female	Alpha-amylase 1	IPI00315893	57606.1	1	45	58	2021	0.0125	0.638	VADYMNHLIDIGVAGFR	K	L	0.95	5.63	0.428	7.89	0	61	16	0	2	1890.95	194	210	IPI00133544
Female	Alpha-amylase 1	IPI00315893	57606.1	1	45	58	2021	0.0125	0.638	VDNHDNQRGHGAGGASILTFWDAR	F	L	0.95	3.53	0.366	0	0	0	2	0	1	2594.23	311	334
Female	Alpha-amylase 1	IPI00315893	57606.1	1	45	58	2021	0.0125	0.638	VMSSYYWPR	R	N	0.95	3.65	0.408	3.51	5	4	0	0	2	1188.55	353	361
Female	Alpha-amylase 1	IPI00315893	57606.1	1	45	58	2021	0.0125	0.638	WWDNDSNQVAFGR	N	G	0.95	4.82	0.431	0	0	2	0	0	1	1594.7	424	436
Female	Alpha-amylase 1	IPI00315893	57606.1	1	45	58	2021	0.0125	0.638	YLAPNGFAGVQVSPPNENIVVHSPSR	R	P	0.95	4.97	0.409	0	0	1	0	0	1	2749.41	46	71
Female	Alpha-amylase 1	IPI00315893	57606.1	1	45	58	2021	0.0125	0.638	YQPISYK	R	I	0.95	2.2	0.245	4.38	17	0	0	0	2	898.467	77	83	IPI00133544
Male	Alpha-amylase 1	IPI00315893	57606.1	1	31	37	326	0.00156	0.462	AGVQVSPPNENIVVHSPSR	F	P	0.95	5.53	0.555	0	0	3	0	0	0	1987.04	53	71
Male	Alpha-amylase 1	IPI00315893	57606.1	1	31	37	326	0.00156	0.462	AGVQVSPPNENIVVHSPSRPWWER	F	Y	0.95	3.78	0.268	0	0	1	0	0	1	2741.39	53	76
Male	Alpha-amylase 1	IPI00315893	57606.1	1	31	37	326	0.00156	0.462	AHFSISNSAEDPFIAIHAESK	K	-	0.95	3.79	0.247	1.44	0	0	1	0	2	2271.1	490	510
Male	Alpha-amylase 1	IPI00315893	57606.1	1	31	37	326	0.00156	0.462	AILDKLHNLNTK	K	W	0.95	4.16	0.305	7.08	0	1	0	0	2	1379.8	224	235
Male	Alpha-amylase 1	IPI00315893	57606.1	1	31	37	326	0.00156	0.462	ALVFVDNHDNQR	R	G	0.95	3.82	0.283	5.82	0	4	0	0	2	1427.7	307	318	IPI00133544
Male	Alpha-amylase 1	IPI00315893	57606.1	1	31	37	326	0.00156	0.462	ANWWDNDSNQVAFGR	F	G	0.95	5.23	0.508	0	0	10	0	0	1	1779.78	422	436
Male	Alpha-amylase 1	IPI00315893	57606.1	1	31	37	326	0.00156	0.462	CDVISGDKVDGNCTGIK	Y	V	0.95	5.6	0.466	0	0	13	0	0	1	1837.84	465	481
Male	Alpha-amylase 1	IPI00315893	57606.1	1	31	37	326	0.00156	0.462	DVNDWVGPPNNNGK	K	T	0.95	3.3	0.232	0	0	3	0	0	2	1525.7	368	381
Male	Alpha-amylase 1	IPI00315893	57606.1	1	31	37	326	0.00156	0.462	EVSINPDSTCGNDWICEHR	K	W	0.95	0	0	7.82	0	21	2	0	2	2288.97	384	402
Male	Alpha-amylase 1	IPI00315893	57606.1	1	31	37	326	0.00156	0.462	GHGAGGASIL	R	T	0.95	2.64	0.308	0	2	0	0	0	1	839.438	319	328
Male	Alpha-amylase 1	IPI00315893	57606.1	1	31	37	326	0.00156	0.462	GNDWICEHR	C	W	0.95	3.05	0.167	0	0	1	0	0	1	1186.51	394	402
Male	Alpha-amylase 1	IPI00315893	57606.1	1	31	37	326	0.00156	0.462	HMWPGDIK	K	A	0.95	2.98	0.226	1.3	2	13	0	0	2	983.477	216	223
Male	Alpha-amylase 1	IPI00315893	57606.1	1	31	37	326	0.00156	0.462	IVVHSPSRPWWER	N	Y	0.95	3.19	0.217	0	0	6	0	0	1	1648.87	64	76
Male	Alpha-amylase 1	IPI00315893	57606.1	1	31	37	326	0.00156	0.462	KVDGNCTGIK	D	V	0.95	3.54	0.333	0	0	2	0	0	1	1091.55	472	481
Male	Alpha-amylase 1	IPI00315893	57606.1	1	31	37	326	0.00156	0.462	LSGLLDLALEK	R	D	0.95	4.54	0.28	5.1	9	33	0	0	2	1171.69	177	187
Male	Alpha-amylase 1	IPI00315893	57606.1	1	31	37	326	0.00156	0.462	LSGLLDLALEKDY	R	V	0.95	4.81	0.424	0	0	3	0	0	1	1449.78	177	189
Male	Alpha-amylase 1	IPI00315893	57606.1	1	31	37	326	0.00156	0.462	LSGLLDLALEKDYVR	R	T	0.95	5.32	0.338	6.14	0	4	2	0	2	1704.95	177	191
Male	Alpha-amylase 1	IPI00315893	57606.1	1	31	37	326	0.00156	0.462	NMVAFR	R	N	0.95	2.28	0.153	1.25	6	0	0	0	2	737.377	408	413	IPI00133544
Male	Alpha-amylase 1	IPI00315893	57606.1	1	31	37	326	0.00156	0.462	NSAEDPFIAIHAESK	S	-	0.95	5.71	0.466	0	0	5	0	0	1	1628.79	496	510
Male	Alpha-amylase 1	IPI00315893	57606.1	1	31	37	326	0.00156	0.462	NWGEGWGLMPSDR	K	A	0.95	4.02	0.453	6.89	0	3	0	0	2	1504.66	294	306
Male	Alpha-amylase 1	IPI00315893	57606.1	1	31	37	326	0.00156	0.462	SGFDFNDGK	Y	C	0.95	3.4	0.384	0	12	52	0	0	1	986.422	147	155
Male	Alpha-amylase 1	IPI00315893	57606.1	1	31	37	326	0.00156	0.462	SGLLDLALEK	L	D	0.95	3.92	0.282	0	0	1	0	0	1	1058.61	178	187
Male	Alpha-amylase 1	IPI00315893	57606.1	1	31	37	326	0.00156	0.462	SGNEDEFR	R	D	0.95	2.99	0.288	5.38	0	31	0	0	2	953.396	88	95	IPI00133544
Male	Alpha-amylase 1	IPI00315893	57606.1	1	31	37	326	0.00156	0.462	SISNSAEDPFIAIHAESK	F	-	0.95	6.2	0.518	0	0	30	0	0	1	1915.94	493	510
Male	Alpha-amylase 1	IPI00315893	57606.1	1	31	37	326	0.00156	0.462	SPSRPWWER	H	Y	0.95	3.06	0.168	0	0	2	0	0	1	1200.59	68	76
Male	Alpha-amylase 1	IPI00315893	57606.1	1	31	37	326	0.00156	0.462	TASGGIENYQDAAQVR	R	D	0.95	5.65	0.411	10.3	0	34	0	0	2	1679.8	158	173
Male	Alpha-amylase 1	IPI00315893	57606.1	1	31	37	326	0.00156	0.462	TKEVSINPDSTCGNDWICEHR	K	W	0.95	6.59	0.47	7.54	0	3	3	0	2	2518.11	382	402
Male	Alpha-amylase 1	IPI00315893	57606.1	1	31	37	326	0.00156	0.462	VDGNCTGIK	K	V	0.95	2.74	0.292	2.96	0	4	0	0	2	963.457	473	481
Male	Alpha-amylase 1	IPI00315893	57606.1	1	31	37	326	0.00156	0.462	VSPPNENIVVHSPSR	Q	P	0.95	2.86	0.409	0	0	1	0	0	0	1631.85	57	71
Male	Alpha-amylase 1	IPI00315893	57606.1	1	31	37	326	0.00156	0.462	VYVGNDGK	K	A	0.95	2.43	0.186	1.66	1	0	0	0	2	851.426	482	489
Male	Alpha-amylase 1	IPI00315893	57606.1	1	31	37	326	0.00156	0.462	YLAPNGFAGVQVSPPNENIVVHSPSRPW	R	W	0.95	3.62	0.508	0	0	0	2	0	1	3032.54	46	73
Male	Alpha-amylase 1	IPI00315893	57606.1	1	42	49	508	0.00238	0.609	AGVQVSPPNENIVVHSPSRPWWER	F	Y	0.95	4.18	0.386	0	0	3	0	0	1	2741.39	53	76
Male	Alpha-amylase 1	IPI00315893	57606.1	1	42	49	508	0.00238	0.609	AHFSISNSAEDPFIAIHAESK	K	-	0.95	2.47	0.0482	3	0	0	1	0	2	2271.1	490	510
Male	Alpha-amylase 1	IPI00315893	57606.1	1	42	49	508	0.00238	0.609	ALVFVDNHDNQR	R	G	0.95	4.09	0.309	6.92	0	5	0	0	2	1427.7	307	318	IPI00133544
Male	Alpha-amylase 1	IPI00315893	57606.1	1	42	49	508	0.00238	0.609	ANWWDNDSNQVAFGR	F	G	0.95	4.6	0.454	0	0	53	2	0	1	1779.78	422	436
Male	Alpha-amylase 1	IPI00315893	57606.1	1	42	49	508	0.00238	0.609	CDVISGDKVDGNCTGIK	Y	V	0.95	5.63	0.453	0	0	5	0	0	1	1837.84	465	481
Male	Alpha-amylase 1	IPI00315893	57606.1	1	42	49	508	0.00238	0.609	CNNVGVR	R	I	0.95	2.46	0.141	1.96	3	0	0	0	2	818.394	101	107	IPI00133544
Male	Alpha-amylase 1	IPI00315893	57606.1	1	42	49	508	0.00238	0.609	DVNDWVGPPNNNGK	K	T	0.95	3.44	0.22	1.25	0	4	0	0	2	1525.7	368	381
Male	Alpha-amylase 1	IPI00315893	57606.1	1	42	49	508	0.00238	0.609	EVSINPDSTCGNDWICEHR	K	W	0.95	0	0	9.29	0	22	3	0	2	2270.96	384	402
Male	Alpha-amylase 1	IPI00315893	57606.1	1	42	49	508	0.00238	0.609	GFAGVQVSPPNENIVVHSPSRPWWER	N	Y	0.95	4.25	0.461	0	0	0	5	0	1	2945.48	51	76
Male	Alpha-amylase 1	IPI00315893	57606.1	1	42	49	508	0.00238	0.609	GHGAGGASIL	R	T	0.949	2.48	0.334	0	1	0	0	0	1	839.438	319	328
Male	Alpha-amylase 1	IPI00315893	57606.1	1	42	49	508	0.00238	0.609	HMWPGDIK	K	A	0.95	3.25	0.205	0	3	6	0	0	2	983.477	216	223
Male	Alpha-amylase 1	IPI00315893	57606.1	1	42	49	508	0.00238	0.609	IAIHAESK	F	-	0.95	2.61	0.181	0	0	2	0	0	1	868.489	503	510
Male	Alpha-amylase 1	IPI00315893	57606.1	1	42	49	508	0.00238	0.609	IFQEVIDLGGEAVSSNEYFGNGR	F	V	0.95	4.33	0.153	0	0	0	1	0	1	2501.19	245	267
Male	Alpha-amylase 1	IPI00315893	57606.1	1	42	49	508	0.00238	0.609	IVVHSPSRPWWER	N	Y	0.95	3.33	0.236	0	0	6	0	0	1	1648.87	64	76
Male	Alpha-amylase 1	IPI00315893	57606.1	1	42	49	508	0.00238	0.609	IYVDAVINHMCGVGAQAGQSSTCGSY	R	F	0.95	5.74	0.569	0	0	0	1	0	1	2745.21	108	133
Male	Alpha-amylase 1	IPI00315893	57606.1	1	42	49	508	0.00238	0.609	LHNLNTK	K	W	0.95	2.51	0.112	1.96	1	0	0	0	2	839.474	229	235	IPI00133544
Male	Alpha-amylase 1	IPI00315893	57606.1	1	42	49	508	0.00238	0.609	LSGLLDLALEK	R	D	0.95	0	0	5.23	15	44	0	0	2	1171.69	177	187
Male	Alpha-amylase 1	IPI00315893	57606.1	1	42	49	508	0.00238	0.609	LSGLLDLALEKDY	R	V	0.95	4.55	0.42	0	0	6	0	0	1	1449.78	177	189
Male	Alpha-amylase 1	IPI00315893	57606.1	1	42	49	508	0.00238	0.609	NMVAFR	R	N	0.95	2.25	0.11	2.07	21	0	0	0	2	737.377	408	413	IPI00133544
Male	Alpha-amylase 1	IPI00315893	57606.1	1	42	49	508	0.00238	0.609	NPDSTCGNDWICEHR	I	W	0.95	5.02	0.49	0	0	3	0	0	1	1860.74	388	402
Male	Alpha-amylase 1	IPI00315893	57606.1	1	42	49	508	0.00238	0.609	NSAEDPFIAIHAESK	S	-	0.95	5.81	0.456	0	0	6	0	0	1	1628.79	496	510
Male	Alpha-amylase 1	IPI00315893	57606.1	1	42	49	508	0.00238	0.609	NWGEGWGLMPSDR	K	A	0.95	4.03	0.434	6.89	0	4	0	0	2	1504.66	294	306
Male	Alpha-amylase 1	IPI00315893	57606.1	1	42	49	508	0.00238	0.609	NWWDNDSNQVAFGR	A	G	0.95	5.34	0.509	0	0	13	0	0	1	1708.75	423	436
Male	Alpha-amylase 1	IPI00315893	57606.1	1	42	49	508	0.00238	0.609	PDSTCGNDWICEHR	N	W	0.95	4.5	0.376	0	0	1	0	0	1	1746.7	389	402
Male	Alpha-amylase 1	IPI00315893	57606.1	1	42	49	508	0.00238	0.609	PFIFQEVIDLGGEAVSSNEY	R	F	0.95	5.22	0.445	0	0	0	3	0	0	2214.06	243	262
Male	Alpha-amylase 1	IPI00315893	57606.1	1	42	49	508	0.00238	0.609	PFIFQEVIDLGGEAVSSNEYF	R	G	0.95	4.26	0.294	0	0	0	4	0	0	2361.13	243	263
Male	Alpha-amylase 1	IPI00315893	57606.1	1	42	49	508	0.00238	0.609	SAEDPFIAIHAESK	N	-	0.95	4.46	0.364	0	0	5	0	0	1	1514.75	497	510
Male	Alpha-amylase 1	IPI00315893	57606.1	1	42	49	508	0.00238	0.609	SGFDFNDGK	Y	C	0.95	3.66	0.384	0	19	47	0	0	1	986.422	147	155
Male	Alpha-amylase 1	IPI00315893	57606.1	1	42	49	508	0.00238	0.609	SGNEDEFR	R	D	0.95	3.07	0.316	6.03	5	66	0	0	2	953.396	88	95	IPI00133544
Male	Alpha-amylase 1	IPI00315893	57606.1	1	42	49	508	0.00238	0.609	SISNSAEDPFIAIHAESK	F	-	0.95	5.92	0.49	0	0	33	0	0	1	1915.94	493	510
Male	Alpha-amylase 1	IPI00315893	57606.1	1	42	49	508	0.00238	0.609	SNSAEDPFIAIHAESK	I	-	0.95	5.36	0.479	0	0	1	0	0	1	1715.82	495	510
Male	Alpha-amylase 1	IPI00315893	57606.1	1	42	49	508	0.00238	0.609	SPSRPWWER	H	Y	0.95	2.98	0.176	0	0	2	0	0	1	1200.59	68	76
Male	Alpha-amylase 1	IPI00315893	57606.1	1	42	49	508	0.00238	0.609	TASGGIENYQDAAQVR	R	D	0.95	5.14	0.454	4.74	0	47	0	0	2	1679.8	158	173
Male	Alpha-amylase 1	IPI00315893	57606.1	1	42	49	508	0.00238	0.609	TKEVSINPDSTCGNDWICEHR	K	W	0.95	0	0	4.77	0	0	1	0	2	2518.11	382	402
Male	Alpha-amylase 1	IPI00315893	57606.1	1	42	49	508	0.00238	0.609	VADYMNHLIDIGVAGFR	K	L	0.95	4.17	0.328	5.03	0	0	2	0	2	1890.95	194	210	IPI00133544
Male	Alpha-amylase 1	IPI00315893	57606.1	1	42	49	508	0.00238	0.609	VDGNCTGIK	K	V	0.95	2.7	0.23	2.8	0	18	0	0	2	963.457	473	481
Male	Alpha-amylase 1	IPI00315893	57606.1	1	42	49	508	0.00238	0.609	VSPPNENIVVHSPSR	Q	P	0.95	2.97	0.404	0	0	1	0	0	0	1631.85	57	71
Male	Alpha-amylase 1	IPI00315893	57606.1	1	42	49	508	0.00238	0.609	VYVGNDGK	K	A	0.95	2.41	0.274	1.77	2	0	0	0	2	851.426	482	489
Male	Alpha-amylase 1	IPI00315893	57606.1	1	42	49	508	0.00238	0.609	YLAPNGFAGVQVSPPNENIVVH	R	S	0.95	3.93	0.423	0	0	1	0	0	1	2322.19	46	67
Male	Alpha-amylase 1	IPI00315893	57606.1	1	42	49	508	0.00238	0.609	YLAPNGFAGVQVSPPNENIVVHSPSR	R	P	0.95	4.31	0.47	0	0	3	0	0	1	2749.41	46	71
Male	Alpha-amylase 1	IPI00315893	57606.1	1	42	49	508	0.00238	0.609	YLAPNGFAGVQVSPPNENIVVHSPSRPW	R	W	0.95	3.51	0.445	0	0	0	1	0	1	3032.54	46	73
Male	Alpha-amylase 1	IPI00315893	57606.1	1	42	49	508	0.00238	0.609	YQPISYK	R	I	0.95	2.31	0.159	4.77	6	1	0	0	2	898.467	77	83	IPI00133544
Male	Alpha-amylase 1	IPI00315893	57606.1	1	46	58	2238	0.0114	0.681	AGVQVSPPNENIVVHSPSRPWWER	F	Y	0.95	3.92	0.426	0	0	27	0	0	1	2741.39	53	76
Male	Alpha-amylase 1	IPI00315893	57606.1	1	46	58	2238	0.0114	0.681	AHFSISNSAEDPFIAIHAESK	K	-	0.95	0	0	11.6	0	117	192	0	2	2271.1	490	510
Male	Alpha-amylase 1	IPI00315893	57606.1	1	46	58	2238	0.0114	0.681	AILDKLHNLNTK	K	W	0.95	3.93	0.33	4.07	0	3	0	0	2	1379.8	224	235
Male	Alpha-amylase 1	IPI00315893	57606.1	1	46	58	2238	0.0114	0.681	ALVFVDNHDNQR	R	G	0.95	3.85	0.272	7.28	28	120	0	0	2	1427.7	307	318	IPI00133544
Male	Alpha-amylase 1	IPI00315893	57606.1	1	46	58	2238	0.0114	0.681	ANWWDNDSNQVAFGR	F	G	0.95	5.11	0.476	0	0	61	0	0	1	1779.78	422	436
Male	Alpha-amylase 1	IPI00315893	57606.1	1	46	58	2238	0.0114	0.681	CDVISGDKVDGNCTGIK	Y	V	0.95	5.61	0.445	0	0	15	0	0	1	1837.84	465	481
Male	Alpha-amylase 1	IPI00315893	57606.1	1	46	58	2238	0.0114	0.681	DFPGVPYSGFDFNDGK	R	C	0.95	3.73	0.475	5.01	0	6	0	0	2	1761.78	140	155
Male	Alpha-amylase 1	IPI00315893	57606.1	1	46	58	2238	0.0114	0.681	DVNDWVGPPNNNGK	K	T	0.95	4.54	0.333	5.24	0	1	0	0	2	1525.7	368	381
Male	Alpha-amylase 1	IPI00315893	57606.1	1	46	58	2238	0.0114	0.681	ENIVVHSPSRPWWER	N	Y	0.95	3.71	0.426	0	0	3	0	0	1	1891.96	62	76
Male	Alpha-amylase 1	IPI00315893	57606.1	1	46	58	2238	0.0114	0.681	EVSINPDSTCGNDWICEHR	K	W	0.95	0	0	6.92	0	38	13	0	2	2288.97	384	402
Male	Alpha-amylase 1	IPI00315893	57606.1	1	46	58	2238	0.0114	0.681	GFAGVQVSPPNENIVVHSPSRPWWER	N	Y	0.95	4.08	0.397	0	0	11	19	0	1	2945.48	51	76
Male	Alpha-amylase 1	IPI00315893	57606.1	1	46	58	2238	0.0114	0.681	GHGAGGASILTFWDAR	R	L	0.95	0	0	16	0	857	15	0	2	1615.8	319	334
Male	Alpha-amylase 1	IPI00315893	57606.1	1	46	58	2238	0.0114	0.681	HMWPGDIK	K	A	0.95	3.27	0.238	0	42	39	0	0	2	983.477	216	223
Male	Alpha-amylase 1	IPI00315893	57606.1	1	46	58	2238	0.0114	0.681	IFQEVIDLGGEAVSSNEYFGNGR	F	V	0.95	6.61	0.421	0	0	7	5	0	1	2501.19	245	267
Male	Alpha-amylase 1	IPI00315893	57606.1	1	46	58	2238	0.0114	0.681	IVVHSPSRPWWER	N	Y	0.95	3.46	0.255	0	0	16	0	0	1	1648.87	64	76
Male	Alpha-amylase 1	IPI00315893	57606.1	1	46	58	2238	0.0114	0.681	IYVDAVINHMCGVGAQAGQSSTCGSY	R	F	0.95	5.1	0.522	0	0	1	0	0	1	2745.21	108	133
Male	Alpha-amylase 1	IPI00315893	57606.1	1	46	58	2238	0.0114	0.681	IYVDAVINHMCGVGAQAGQSSTCGSYFNPNNR	R	D	0.95	0	0	13	0	0	8	0	2	3487.56	108	139
Male	Alpha-amylase 1	IPI00315893	57606.1	1	46	58	2238	0.0114	0.681	LHNLNTK	K	W	0.95	2.4	0.0112	4	8	0	0	0	2	839.474	229	235	IPI00133544
Male	Alpha-amylase 1	IPI00315893	57606.1	1	46	58	2238	0.0114	0.681	LMPSDRALVFVDNHDNQR	G	G	0.95	3.6	0.183	0	0	0	6	0	1	2143.04	301	318
Male	Alpha-amylase 1	IPI00315893	57606.1	1	46	58	2238	0.0114	0.681	LSGLLDLALEK	R	D	0.95	4.27	0.268	3.77	2	11	0	0	2	1171.69	177	187
Male	Alpha-amylase 1	IPI00315893	57606.1	1	46	58	2238	0.0114	0.681	MAVGFMLAHPYGFTR	K	V	0.95	4.21	0.51	4.6	0	3	0	0	2	1713.82	338	352	IPI00133544
Male	Alpha-amylase 1	IPI00315893	57606.1	1	46	58	2238	0.0114	0.681	NFQNGKDVNDWVGPPNNNGK	R	T	0.95	4.08	0.21	2.05	0	1	0	0	2	2214.03	362	381
Male	Alpha-amylase 1	IPI00315893	57606.1	1	46	58	2238	0.0114	0.681	NIVVHSPSRPWWER	E	Y	0.946	3.33	0.156	0	0	1	0	0	1	1762.91	63	76
Male	Alpha-amylase 1	IPI00315893	57606.1	1	46	58	2238	0.0114	0.681	NMVAFR	R	N	0.95	2.4	0.15	1.89	13	0	0	0	2	737.377	408	413	IPI00133544
Male	Alpha-amylase 1	IPI00315893	57606.1	1	46	58	2238	0.0114	0.681	NPDSTCGNDWICEHR	I	W	0.95	4.96	0.55	0	0	7	0	0	1	1860.74	388	402
Male	Alpha-amylase 1	IPI00315893	57606.1	1	46	58	2238	0.0114	0.681	NVVNGQPFANWWDNDSNQVAF	R	G	0.95	4.18	0.402	0	0	2	0	0	1	2422.09	414	434
Male	Alpha-amylase 1	IPI00315893	57606.1	1	46	58	2238	0.0114	0.681	NVVNGQPFANWWDNDSNQVAFGR	R	G	0.95	5.49	0.562	7.68	0	26	5	0	2	2635.21	414	436
Male	Alpha-amylase 1	IPI00315893	57606.1	1	46	58	2238	0.0114	0.681	NWGEGWGLMPSDR	K	A	0.95	0	0	6.68	0	86	0	0	2	1504.66	294	306
Male	Alpha-amylase 1	IPI00315893	57606.1	1	46	58	2238	0.0114	0.681	NWWDNDSNQVAFGR	A	G	0.95	5.02	0.498	0	0	5	0	0	1	1708.75	423	436
Male	Alpha-amylase 1	IPI00315893	57606.1	1	46	58	2238	0.0114	0.681	PDSTCGNDWICEHR	N	W	0.95	4.61	0.564	0	0	12	0	0	1	1746.7	389	402
Male	Alpha-amylase 1	IPI00315893	57606.1	1	46	58	2238	0.0114	0.681	PFIFQEVIDLGGEAVSSNEYFGNGR	R	V	0.95	7.03	0.53	0	0	6	228	0	1	2745.32	243	267
Male	Alpha-amylase 1	IPI00315893	57606.1	1	46	58	2238	0.0114	0.681	PNGFAGVQVSPPNENIVVHSPSRPWWER	A	Y	0.95	4.38	0.213	0	0	0	2	0	1	3156.58	49	76
Male	Alpha-amylase 1	IPI00315893	57606.1	1	46	58	2238	0.0114	0.681	PPNENIVVHSPSRPWWER	S	Y	0.95	4.7	0.476	0	0	10	0	0	1	2200.11	59	76
Male	Alpha-amylase 1	IPI00315893	57606.1	1	46	58	2238	0.0114	0.681	SGFDFNDGK	Y	C	0.95	3.26	0.294	0	65	0	0	0	1	986.422	147	155
Male	Alpha-amylase 1	IPI00315893	57606.1	1	46	58	2238	0.0114	0.681	SINPDSTCGNDWICEHR	V	W	0.95	5.51	0.454	0	0	3	0	0	1	2060.86	386	402
Male	Alpha-amylase 1	IPI00315893	57606.1	1	46	58	2238	0.0114	0.681	SISNSAEDPFIAIHAESK	F	-	0.95	6.49	0.482	0	0	25	0	0	1	1915.94	493	510
Male	Alpha-amylase 1	IPI00315893	57606.1	1	46	58	2238	0.0114	0.681	SNSAEDPFIAIHAESK	I	-	0.95	4.46	0.302	0	0	1	0	0	1	1715.82	495	510
Male	Alpha-amylase 1	IPI00315893	57606.1	1	46	58	2238	0.0114	0.681	SPSRPWWER	H	Y	0.95	2.91	0.183	0	0	2	0	0	1	1200.59	68	76
Male	Alpha-amylase 1	IPI00315893	57606.1	1	46	58	2238	0.0114	0.681	TASGGIENYQDAAQVR	R	D	0.95	5.83	0.381	10.2	0	14	0	0	2	1679.8	158	173
Male	Alpha-amylase 1	IPI00315893	57606.1	1	46	58	2238	0.0114	0.681	TKEVSINPDSTCGNDWICEHR	K	W	0.95	0	0	8.05	0	0	2	0	2	2518.11	382	402
Male	Alpha-amylase 1	IPI00315893	57606.1	1	46	58	2238	0.0114	0.681	VADYMNHLIDIGVAGFR	K	L	0.95	5.68	0.374	8.4	0	15	6	0	2	1890.95	194	210	IPI00133544
Male	Alpha-amylase 1	IPI00315893	57606.1	1	46	58	2238	0.0114	0.681	VDNHDNQRGHGAGGASILTFWDAR	F	L	0.95	3.64	0.377	0	0	0	1	0	1	2594.23	311	334
Male	Alpha-amylase 1	IPI00315893	57606.1	1	46	58	2238	0.0114	0.681	VMSSYYWPR	R	N	0.95	3.61	0.392	3.64	4	6	0	0	2	1188.55	353	361
Male	Alpha-amylase 1	IPI00315893	57606.1	1	46	58	2238	0.0114	0.681	VSPPNENIVVHSPSRPWWER	Q	Y	0.95	2.93	0.323	0	0	3	0	0	1	2386.21	57	76
Male	Alpha-amylase 1	IPI00315893	57606.1	1	46	58	2238	0.0114	0.681	YLAPNGFAGVQVSPPNENIVVHSPSR	R	P	0.95	4.4	0.476	0	0	1	0	0	1	2749.41	46	71
Male	Alpha-amylase 1	IPI00315893	57606.1	1	46	58	2238	0.0114	0.681	YQPISYK	R	I	0.95	2.4	0.231	4	12	0	0	0	2	898.467	77	83	IPI00133544
Female	Androgen binding protein alpha	IPI00127933	10062.2	1	12	16	203	0.000989	0.533	AQATSLINKITASR	K	T	0.95	4.19	0.349	3.47	0	1	0	0	2	1473.84	77	90
Female	Androgen binding protein alpha	IPI00127933	10062.2	1	12	16	203	0.000989	0.533	EEDKAQATSLINK	T	I	0.95	3.82	0.254	0	0	1	0	0	1	1446.74	73	85
Female	Androgen binding protein alpha	IPI00127933	10062.2	1	12	16	203	0.000989	0.533	KVDLFLNGTTEEYVEY	R	L	0.95	2.86	0.311	0	0	9	0	0	1	1919.93	31	46
Female	Androgen binding protein alpha	IPI00127933	10062.2	1	12	16	203	0.000989	0.533	KVDLFLNGTTEEYVEYLK	R	Q	0.95	3.99	0.213	2.01	0	9	0	0	2	2161.11	31	48
Female	Androgen binding protein alpha	IPI00127933	10062.2	1	12	16	203	0.000989	0.533	TLTEEDK	R	A	0.95	2.06	0.0804	1.36	1	0	0	0	2	835.405	70	76
Female	Androgen binding protein alpha	IPI00127933	10062.2	1	12	16	203	0.000989	0.533	TLTEEDKAQAT	R	S	0.95	3.28	0.26	0	0	4	0	0	1	1206.59	70	80
Female	Androgen binding protein alpha	IPI00127933	10062.2	1	12	16	203	0.000989	0.533	TLTEEDKAQATSL	R	I	0.95	4.54	0.414	0	3	5	0	0	1	1406.7	70	82
Female	Androgen binding protein alpha	IPI00127933	10062.2	1	12	16	203	0.000989	0.533	TLTEEDKAQATSLINK	R	I	0.95	5.65	0.348	7.28	0	13	2	0	2	1761.92	70	85
Female	Androgen binding protein alpha	IPI00127933	10062.2	1	12	16	203	0.000989	0.533	TLTEEDKAQATSLINKI	R	T	0.95	3.78	0.182	0	0	1	0	0	1	1875.01	70	86
Female	Androgen binding protein alpha	IPI00127933	10062.2	1	12	16	203	0.000989	0.533	VDLFLNGTTEEYVEYLK	K	Q	0.95	3.85	0.148	3.62	0	1	0	0	2	2033.01	32	48
Female	Androgen binding protein alpha	IPI00127933	10062.2	1	12	16	203	0.000989	0.533	VLENAANIK	K	K	0.95	3.66	0.291	2.7	10	91	0	0	2	971.553	56	64
Female	Androgen binding protein alpha	IPI00127933	10062.2	1	12	16	203	0.000989	0.533	VLENAANIKK	K	C	0.95	3.71	0.29	3.46	3	49	0	0	2	1099.65	56	65
Female	Androgen binding protein alpha	IPI00127933	10062.2	1	10	16	194	0.000948	0.543	AQATSLINKITASR	K	T	0.95	3.61	0.42	4.85	0	2	0	0	2	1473.84	77	90
Female	Androgen binding protein alpha	IPI00127933	10062.2	1	10	16	194	0.000948	0.543	KVDLFLNGTTEEYVEYLK	R	Q	0.95	3.89	0.242	0	0	9	1	0	2	2161.11	31	48
Female	Androgen binding protein alpha	IPI00127933	10062.2	1	10	16	194	0.000948	0.543	KVLENAANIK	T	K	0.95	4.14	0.263	0	0	3	0	0	1	1099.65	55	64
Female	Androgen binding protein alpha	IPI00127933	10062.2	1	10	16	194	0.000948	0.543	TEEDKAQATSLINK	L	I	0.95	5.06	0.281	0	0	1	0	0	1	1547.79	72	85
Female	Androgen binding protein alpha	IPI00127933	10062.2	1	10	16	194	0.000948	0.543	TLTEEDK	R	A	0.95	2.25	0	3.05	10	0	0	0	2	835.405	70	76
Female	Androgen binding protein alpha	IPI00127933	10062.2	1	10	16	194	0.000948	0.543	TLTEEDKAQAT	R	S	0.95	3.65	0.376	0	2	15	0	0	1	1206.59	70	80
Female	Androgen binding protein alpha	IPI00127933	10062.2	1	10	16	194	0.000948	0.543	TLTEEDKAQATSL	R	I	0.95	4.19	0.382	0	5	22	0	0	1	1406.7	70	82
Female	Androgen binding protein alpha	IPI00127933	10062.2	1	10	16	194	0.000948	0.543	TLTEEDKAQATSLINK	R	I	0.95	4.54	0.343	2.57	0	17	6	0	2	1761.92	70	85
Female	Androgen binding protein alpha	IPI00127933	10062.2	1	10	16	194	0.000948	0.543	VLENAANIK	K	K	0.95	3.77	0.284	4.21	25	57	0	0	2	971.553	56	64
Female	Androgen binding protein alpha	IPI00127933	10062.2	1	10	16	194	0.000948	0.543	VLENAANIKK	K	C	0.95	3.82	0.283	3.74	2	17	0	0	2	1099.65	56	65
Female	Androgen binding protein alpha	IPI00127933	10062.2	1	6	9	335	0.00207	0.478	AQATSLINK	K	I	0.95	3.04	0.121	1.92	10	5	0	0	2	945.537	77	85
Female	Androgen binding protein alpha	IPI00127933	10062.2	1	6	9	335	0.00207	0.478	KVDLFLNGTTEEYVEYLK	R	Q	0.95	5.09	0.315	0	0	25	0	0	2	2161.11	31	48
Female	Androgen binding protein alpha	IPI00127933	10062.2	1	6	9	335	0.00207	0.478	TEEDKAQATSLINK	L	I	0.95	5.36	0.381	0	0	8	0	0	1	1547.79	72	85
Female	Androgen binding protein alpha	IPI00127933	10062.2	1	6	9	335	0.00207	0.478	TLTEEDKAQATSLINK	R	I	0.95	0	0	10.8	0	259	2	0	2	1761.92	70	85
Female	Androgen binding protein alpha	IPI00127933	10062.2	1	6	9	335	0.00207	0.478	VLENAANIK	K	K	0.95	3.43	0.251	3.85	20	5	0	0	2	971.553	56	64
Female	Androgen binding protein alpha	IPI00127933	10062.2	1	6	9	335	0.00207	0.478	VLENAANIKK	K	C	0.95	3.26	0.239	1.68	0	1	0	0	2	1099.65	56	65
Male	Androgen binding protein alpha	IPI00127933	10062.2	1	9	13	220	0.00105	0.609	AQATSLINKITASR	K	T	0.95	5.03	0.471	8.44	0	2	2	0	2	1473.84	77	90
Male	Androgen binding protein alpha	IPI00127933	10062.2	1	9	13	220	0.00105	0.609	KVDLFLNGTTEEYVEYLK	R	Q	0.95	3.38	0.173	0	0	1	0	0	2	2161.11	31	48
Male	Androgen binding protein alpha	IPI00127933	10062.2	1	9	13	220	0.00105	0.609	QFNENTKVLENAANIK	K	K	0.95	0	0	3.16	0	1	0	0	2	1815.92	49	64
Male	Androgen binding protein alpha	IPI00127933	10062.2	1	9	13	220	0.00105	0.609	TLTEEDKAQAT	R	S	0.95	3.41	0.385	0	0	22	0	0	1	1206.59	70	80
Male	Androgen binding protein alpha	IPI00127933	10062.2	1	9	13	220	0.00105	0.609	TLTEEDKAQATSL	R	I	0.95	4.55	0.395	0	6	47	0	0	1	1406.7	70	82
Male	Androgen binding protein alpha	IPI00127933	10062.2	1	9	13	220	0.00105	0.609	TLTEEDKAQATSLINK	R	I	0.95	5.79	0.341	9.21	0	14	3	0	2	1761.92	70	85
Male	Androgen binding protein alpha	IPI00127933	10062.2	1	9	13	220	0.00105	0.609	TLTEEDKAQATSLINKITASR	R	T	0.95	5.73	0.368	4.44	0	0	2	0	2	2290.23	70	90
Male	Androgen binding protein alpha	IPI00127933	10062.2	1	9	13	220	0.00105	0.609	VLENAANIK	K	K	0.95	3.68	0.285	2.92	23	85	0	0	2	971.553	56	64
Male	Androgen binding protein alpha	IPI00127933	10062.2	1	9	13	220	0.00105	0.609	VLENAANIKK	K	C	0.95	3.46	0.317	3.08	0	12	0	0	2	1099.65	56	65
Male	Androgen binding protein alpha	IPI00127933	10062.2	1	14	19	183	0.000856	0.543	AQATSLINK	K	I	0.95	2.22	0.116	3.01	0	2	0	0	2	945.537	77	85
Male	Androgen binding protein alpha	IPI00127933	10062.2	1	14	19	183	0.000856	0.543	AQATSLINKITASR	K	T	0.95	3.99	0.383	4.08	0	1	0	0	2	1473.84	77	90
Male	Androgen binding protein alpha	IPI00127933	10062.2	1	14	19	183	0.000856	0.543	KVDLFLNGTTEEYVEY	R	L	0.95	3.27	0.27	0	0	3	0	0	1	1919.93	31	46
Male	Androgen binding protein alpha	IPI00127933	10062.2	1	14	19	183	0.000856	0.543	KVDLFLNGTTEEYVEYLK	R	Q	0.95	3.8	0.252	0	0	15	2	0	2	2161.11	31	48
Male	Androgen binding protein alpha	IPI00127933	10062.2	1	14	19	183	0.000856	0.543	KVLENAANIK	T	K	0.95	3.27	0.267	0	3	0	0	0	1	1099.65	55	64
Male	Androgen binding protein alpha	IPI00127933	10062.2	1	14	19	183	0.000856	0.543	TEEDKAQATSLINK	L	I	0.95	5.43	0.39	0	0	3	0	0	1	1547.79	72	85
Male	Androgen binding protein alpha	IPI00127933	10062.2	1	14	19	183	0.000856	0.543	TLTEEDK	R	A	0.95	1.97	0.12	2.35	4	0	0	0	2	835.405	70	76
Male	Androgen binding protein alpha	IPI00127933	10062.2	1	14	19	183	0.000856	0.543	TLTEEDKAQAT	R	S	0.95	2.77	0.342	0	0	8	0	0	1	1206.59	70	80
Male	Androgen binding protein alpha	IPI00127933	10062.2	1	14	19	183	0.000856	0.543	TLTEEDKAQATSL	R	I	0.95	4.48	0.426	0	3	33	0	0	1	1406.7	70	82
Male	Androgen binding protein alpha	IPI00127933	10062.2	1	14	19	183	0.000856	0.543	TLTEEDKAQATSLINK	R	I	0.95	4.74	0.412	4.22	0	9	5	0	2	1761.92	70	85
Male	Androgen binding protein alpha	IPI00127933	10062.2	1	14	19	183	0.000856	0.543	TLTEEDKAQATSLINKI	R	T	0.95	4.15	0.0996	0	0	1	0	0	1	1875.01	70	86
Male	Androgen binding protein alpha	IPI00127933	10062.2	1	14	19	183	0.000856	0.543	TLTEEDKAQATSLINKITASR	R	T	0.95	5.54	0.379	2.92	0	0	1	0	2	2290.23	70	90
Male	Androgen binding protein alpha	IPI00127933	10062.2	1	14	19	183	0.000856	0.543	VLENAANIK	K	K	0.95	3.8	0.265	3.24	25	53	0	0	2	971.553	56	64
Male	Androgen binding protein alpha	IPI00127933	10062.2	1	14	19	183	0.000856	0.543	VLENAANIKK	K	C	0.95	3.55	0.293	4.04	1	11	0	0	2	1099.65	56	65
Male	Androgen binding protein alpha	IPI00127933	10062.2	1	8	10	247	0.00125	0.489	AQATSLINK	K	I	0.95	2.9	0.168	1.15	4	0	0	0	2	945.537	77	85
Male	Androgen binding protein alpha	IPI00127933	10062.2	1	8	10	247	0.00125	0.489	KVDLFLNGTTEEYVEYLK	R	Q	0.95	3.83	0.197	2.37	0	12	0	0	2	2161.11	31	48
Male	Androgen binding protein alpha	IPI00127933	10062.2	1	8	10	247	0.00125	0.489	KVLENAANIK	T	K	0.95	4.18	0.264	0	0	1	0	0	1	1099.65	55	64
Male	Androgen binding protein alpha	IPI00127933	10062.2	1	8	10	247	0.00125	0.489	TEEDKAQATSLINK	L	I	0.95	5.31	0.378	0	0	12	0	0	1	1547.79	72	85
Male	Androgen binding protein alpha	IPI00127933	10062.2	1	8	10	247	0.00125	0.489	TLTEEDK	R	A	0.95	1.97	0.104	2	1	0	0	0	2	835.405	70	76
Male	Androgen binding protein alpha	IPI00127933	10062.2	1	8	10	247	0.00125	0.489	TLTEEDKAQATSLINK	R	I	0.95	0	0	6.19	0	168	14	0	2	1761.92	70	85
Male	Androgen binding protein alpha	IPI00127933	10062.2	1	8	10	247	0.00125	0.489	VLENAANIK	K	K	0.95	3.48	0.231	3.42	23	8	0	0	2	971.553	56	64
Male	Androgen binding protein alpha	IPI00127933	10062.2	1	8	10	247	0.00125	0.489	VLENAANIKK	K	C	0.95	2.93	0.293	3.21	0	4	0	0	2	1099.65	56	65
Female	androgen binding protein gamma	IPI00170392	12776.9	1	10	18	157	0.000765	0.562	EEGQKTIILNPQIMLSLYLSPECKK	R	Y	0.95	0	0	5.34	0	0	2	0	2	2932.55	68	92
Female	androgen binding protein gamma	IPI00170392	12776.9	1	10	18	157	0.000765	0.562	IQDCFREEGQK	K	T	0.95	3.65	0.232	3.8	1	6	0	0	2	1409.65	62	72
Female	androgen binding protein gamma	IPI00170392	12776.9	1	10	18	157	0.000765	0.562	IQDFLNQSNIH	K	-	0.95	4.41	0.251	5.37	4	10	0	0	2	1328.66	102	112
Female	androgen binding protein gamma	IPI00170392	12776.9	1	10	18	157	0.000765	0.562	KIQDFLNQSNIH	K	-	0.95	4.71	0.366	6.26	9	18	3	0	2	1456.76	101	112
Female	androgen binding protein gamma	IPI00170392	12776.9	1	10	18	157	0.000765	0.562	KYYGNDLLK	K	K	0.95	3.09	0.3	2	0	5	0	0	2	1113.59	92	100
Female	androgen binding protein gamma	IPI00170392	12776.9	1	10	18	157	0.000765	0.562	RTFLHGDLSQFY	R	A	0.95	3.37	0.448	0	2	21	0	0	1	1483.73	39	50
Female	androgen binding protein gamma	IPI00170392	12776.9	1	10	18	157	0.000765	0.562	TFLHGDLSQF	R	Y	0.95	3.34	0.325	0	0	2	0	0	1	1164.57	40	49
Female	androgen binding protein gamma	IPI00170392	12776.9	1	10	18	157	0.000765	0.562	TFLHGDLSQFY	R	A	0.95	3.26	0.358	0	14	42	0	0	1	1327.63	40	50
Female	androgen binding protein gamma	IPI00170392	12776.9	1	10	18	157	0.000765	0.562	YYGNDLLK	K	K	0.95	2.69	0.178	1.85	9	5	0	0	2	985.5	93	100
Female	androgen binding protein gamma	IPI00170392	12776.9	1	10	18	157	0.000765	0.562	YYGNDLLKK	K	I	0.95	2.69	0.254	3.77	2	2	0	0	2	1113.59	93	101
Female	androgen binding protein gamma	IPI00170392	12776.9	1	11	17	171	0.000835	0.527	IQDCFREEGQK	K	T	0.95	3.68	0.207	2.6	0	8	0	0	2	1409.65	62	72
Female	androgen binding protein gamma	IPI00170392	12776.9	1	11	17	171	0.000835	0.527	IQDFLNQSNIH	K	-	0.95	4.52	0.256	6.44	5	16	0	0	2	1328.66	102	112
Female	androgen binding protein gamma	IPI00170392	12776.9	1	11	17	171	0.000835	0.527	KIQDFLNQSNIH	K	-	0.95	4.96	0.381	5.62	5	31	5	0	2	1456.76	101	112
Female	androgen binding protein gamma	IPI00170392	12776.9	1	11	17	171	0.000835	0.527	KYYGNDLLK	K	K	0.95	3.03	0.295	1.17	0	8	0	0	2	1113.59	92	100
Female	androgen binding protein gamma	IPI00170392	12776.9	1	11	17	171	0.000835	0.527	QDFLNQSNIH	I	-	0.95	2.96	0.277	0	0	2	0	0	1	1215.58	103	112
Female	androgen binding protein gamma	IPI00170392	12776.9	1	11	17	171	0.000835	0.527	RTFLHGDLSQFY	R	A	0.95	3.74	0.405	0	0	30	0	0	1	1483.73	39	50
Female	androgen binding protein gamma	IPI00170392	12776.9	1	11	17	171	0.000835	0.527	TFLHGDLSQF	R	Y	0.95	3.24	0.264	0	0	2	0	0	1	1164.57	40	49
Female	androgen binding protein gamma	IPI00170392	12776.9	1	11	17	171	0.000835	0.527	TFLHGDLSQFY	R	A	0.95	3.04	0.404	0	8	30	0	0	1	1327.63	40	50
Female	androgen binding protein gamma	IPI00170392	12776.9	1	11	17	171	0.000835	0.527	TYGAILTLRRTFLHGDLSQFYATVAER	R	V	0.95	4.01	0.497	0	0	0	2	0	2	3099.64	30	56
Female	androgen binding protein gamma	IPI00170392	12776.9	1	11	17	171	0.000835	0.527	YYGNDLLK	K	K	0.95	3.09	0.144	1.21	8	3	0	0	2	985.5	93	100
Female	androgen binding protein gamma	IPI00170392	12776.9	1	11	17	171	0.000835	0.527	YYGNDLLKK	K	I	0.95	2.81	0.284	4.85	1	7	0	0	2	1113.59	93	101
Female	androgen binding protein gamma	IPI00170392	12776.9	1	12	19	340	0.0021	0.696	IMLSLYLSPECK	Q	K	0.95	2.82	0.277	0	0	1	0	0	1	1453.74	80	91
Female	androgen binding protein gamma	IPI00170392	12776.9	1	12	19	340	0.0021	0.696	IQDCFREEGQK	K	T	0.95	3.68	0.193	3.43	0	10	0	0	2	1409.65	62	72
Female	androgen binding protein gamma	IPI00170392	12776.9	1	12	19	340	0.0021	0.696	IQDFLNQSNIH	K	-	0.95	4.26	0.268	5.28	3	5	0	0	2	1328.66	102	112
Female	androgen binding protein gamma	IPI00170392	12776.9	1	12	19	340	0.0021	0.696	KIQDFLNQSNIH	K	-	0.95	5.01	0.372	6.96	11	34	0	0	2	1456.76	101	112
Female	androgen binding protein gamma	IPI00170392	12776.9	1	12	19	340	0.0021	0.696	KYYGNDLLK	K	K	0.95	3.3	0.359	2.12	4	22	0	0	2	1113.59	92	100
Female	androgen binding protein gamma	IPI00170392	12776.9	1	12	19	340	0.0021	0.696	LHGDLSQFYATVAER	F	V	0.95	5.7	0.548	0	0	1	0	0	1	1706.85	42	56
Female	androgen binding protein gamma	IPI00170392	12776.9	1	12	19	340	0.0021	0.696	RTFLHGDLSQFYATVAER	R	V	0.95	6.32	0.532	3.96	0	11	11	0	2	2111.07	39	56
Female	androgen binding protein gamma	IPI00170392	12776.9	1	12	19	340	0.0021	0.696	TFLHGDLSQFYATVAER	R	V	0.95	0	0	17.1	0	140	24	0	2	1954.97	40	56
Female	androgen binding protein gamma	IPI00170392	12776.9	1	12	19	340	0.0021	0.696	TIILNPQIMLSLYLSPECK	K	K	0.95	0	0	9.92	0	51	2	0	2	2233.2	73	91
Female	androgen binding protein gamma	IPI00170392	12776.9	1	12	19	340	0.0021	0.696	TYGAILTLR	R	R	0.95	2.67	0.177	2.2	4	1	0	0	2	1007.59	30	38
Female	androgen binding protein gamma	IPI00170392	12776.9	1	12	19	340	0.0021	0.696	TYGAILTLRR	R	T	0.95	2.63	0.202	2.22	0	1	0	0	2	1163.69	30	39
Female	androgen binding protein gamma	IPI00170392	12776.9	1	12	19	340	0.0021	0.696	YYGNDLLK	K	K	0.95	2.72	0.107	2.66	4	0	0	0	2	985.5	93	100
Male	androgen binding protein gamma	IPI00170392	12776.9	1	8	14	93	0.000444	0.393	IQDCFREEGQK	K	T	0.95	3.6	0.0599	4.25	0	1	0	0	2	1409.65	62	72
Male	androgen binding protein gamma	IPI00170392	12776.9	1	8	14	93	0.000444	0.393	IQDFLNQSNIH	K	-	0.95	4.53	0.257	5.77	3	21	0	0	2	1328.66	102	112
Male	androgen binding protein gamma	IPI00170392	12776.9	1	8	14	93	0.000444	0.393	KIQDFLNQSNIH	K	-	0.95	4.88	0.37	9.22	3	18	2	0	2	1456.76	101	112
Male	androgen binding protein gamma	IPI00170392	12776.9	1	8	14	93	0.000444	0.393	KYYGNDLLK	K	K	0.95	3	0.348	2.54	1	3	0	0	2	1113.59	92	100
Male	androgen binding protein gamma	IPI00170392	12776.9	1	8	14	93	0.000444	0.393	RTFLHGDLSQFY	R	A	0.95	3.54	0.35	0	3	3	0	0	1	1483.73	39	50
Male	androgen binding protein gamma	IPI00170392	12776.9	1	8	14	93	0.000444	0.393	TFLHGDLSQFY	R	A	0.95	3.27	0.351	0	5	19	0	0	1	1327.63	40	50
Male	androgen binding protein gamma	IPI00170392	12776.9	1	8	14	93	0.000444	0.393	YYGNDLLK	K	K	0.95	2.55	0.163	1.37	8	0	0	0	2	985.5	93	100
Male	androgen binding protein gamma	IPI00170392	12776.9	1	8	14	93	0.000444	0.393	YYGNDLLKK	K	I	0.95	2.75	0.284	3.44	0	3	0	0	2	1113.59	93	101
Male	androgen binding protein gamma	IPI00170392	12776.9	1	7	13	184	0.00086	0.295	IQDFLNQSNIH	K	-	0.95	4.09	0.28	5.36	3	26	0	0	2	1328.66	102	112
Male	androgen binding protein gamma	IPI00170392	12776.9	1	7	13	184	0.00086	0.295	KIQDFLNQS	K	N	0.95	2.84	0.225	0	0	2	0	0	1	1092.57	101	109
Male	androgen binding protein gamma	IPI00170392	12776.9	1	7	13	184	0.00086	0.295	KIQDFLNQSNIH	K	-	0.95	5.12	0.353	6.11	2	24	4	0	2	1456.76	101	112
Male	androgen binding protein gamma	IPI00170392	12776.9	1	7	13	184	0.00086	0.295	KYYGNDLLK	K	K	0.95	2.96	0.317	2.33	0	2	0	0	2	1113.59	92	100
Male	androgen binding protein gamma	IPI00170392	12776.9	1	7	13	184	0.00086	0.295	RTFLHGDLSQFY	R	A	0.95	3.75	0.39	0	3	4	0	0	1	1483.73	39	50
Male	androgen binding protein gamma	IPI00170392	12776.9	1	7	13	184	0.00086	0.295	TFLHGDLSQFY	R	A	0.95	2.98	0.373	0	22	77	0	0	1	1327.63	40	50
Male	androgen binding protein gamma	IPI00170392	12776.9	1	7	13	184	0.00086	0.295	YYGNDLLK	K	K	0.95	2.89	0.196	0	13	2	0	0	2	985.5	93	100
Male	androgen binding protein gamma	IPI00170392	12776.9	1	11	17	333	0.00169	0.696	HGDLSQFYATVAER	L	V	0.95	5.45	0.501	0	0	2	0	0	1	1593.77	43	56
Male	androgen binding protein gamma	IPI00170392	12776.9	1	11	17	333	0.00169	0.696	IQDCFREEGQK	K	T	0.95	3.33	0.157	3.03	0	3	0	0	2	1409.65	62	72
Male	androgen binding protein gamma	IPI00170392	12776.9	1	11	17	333	0.00169	0.696	IQDFLNQSNIH	K	-	0.95	4.42	0.248	5	3	6	0	0	2	1328.66	102	112
Male	androgen binding protein gamma	IPI00170392	12776.9	1	11	17	333	0.00169	0.696	KIQDFLNQSNIH	K	-	0.95	4.92	0.364	6.43	10	28	0	0	2	1456.76	101	112
Male	androgen binding protein gamma	IPI00170392	12776.9	1	11	17	333	0.00169	0.696	KYYGNDLLK	K	K	0.95	3.2	0.341	2.57	1	25	0	0	2	1113.59	92	100
Male	androgen binding protein gamma	IPI00170392	12776.9	1	11	17	333	0.00169	0.696	RTFLHGDLSQFY	R	A	0.95	3.55	0.356	0	0	10	0	0	1	1483.73	39	50
Male	androgen binding protein gamma	IPI00170392	12776.9	1	11	17	333	0.00169	0.696	TFLHGDLSQFY	R	A	0.95	2.98	0.341	0	8	9	0	0	1	1327.63	40	50
Male	androgen binding protein gamma	IPI00170392	12776.9	1	11	17	333	0.00169	0.696	TFLHGDLSQFYATVAER	R	V	0.95	0	0	8.55	0	29	10	0	2	1954.97	40	56
Male	androgen binding protein gamma	IPI00170392	12776.9	1	11	17	333	0.00169	0.696	TIILNPQIMLSLYLSPECK	K	K	0.95	0	0	12.9	0	175	4	0	2	2233.2	73	91
Male	androgen binding protein gamma	IPI00170392	12776.9	1	11	17	333	0.00169	0.696	TYGAILTLR	R	R	0.95	2.73	0.142	3.1	2	0	0	0	2	1007.59	30	38
Male	androgen binding protein gamma	IPI00170392	12776.9	1	11	17	333	0.00169	0.696	YYGNDLLK	K	K	0.95	2.75	0.133	2.32	8	0	0	0	2	985.5	93	100
Female	angiotensinogen	IPI00654069	52653.2	1	3	3	8	3.9e-05	0.0871	GSYNLQDLLAEDKLPTLL	R	G	0.95	4.12	0.342	0	0	3	0	0	1	2003.07	384	401
Female	angiotensinogen	IPI00654069	52653.2	1	3	3	8	3.9e-05	0.0871	LTLPQLEIR	R	G	0.95	2.8	0.126	1.34	0	2	0	0	2	1082.66	375	383
Female	angiotensinogen	IPI00654069	52653.2	1	3	3	8	3.9e-05	0.0871	NLQDLLAEDKLPTLLGAEANLNNIGDTNPR	Y	V	0.95	4.71	0.406	0	0	0	3	0	1	3232.68	387	416
Female	angiotensinogen	IPI00654069	52653.2	1	3	3	3	1.47e-05	0.0726	LTLPQLEIR	R	G	0.95	2.6	0.152	1.74	0	1	0	0	2	1082.66	375	383
Female	angiotensinogen	IPI00654069	52653.2	1	3	3	3	1.47e-05	0.0726	RNDLLTWIENPPPR	F	A	0.95	4.36	0.325	0	0	1	0	0	1	1720.91	358	371
Female	angiotensinogen	IPI00654069	52653.2	1	3	3	3	1.47e-05	0.0726	TLHDQLVLAAEK	K	L	0.95	3.7	0.347	5.82	0	1	0	0	2	1337.74	79	90
Female	angiotensinogen	IPI00654069	52653.2	1	3	3	16	9.89e-05	0.131	AIQGLLVTQGGSSSQTPLLQSIVVGLFTAPGFR	R	L	0.95	6.96	0.598	6.72	0	0	10	0	2	3342.84	181	213
Female	angiotensinogen	IPI00654069	52653.2	1	3	3	16	9.89e-05	0.131	HSFVQSLALFTPALFPR	K	S	0.95	6.98	0.548	11.1	0	5	0	0	2	1931.05	216	232
Female	angiotensinogen	IPI00654069	52653.2	1	3	3	16	9.89e-05	0.131	VGEVLNSILLELK	R	A	0.95	0	0	8.48	0	1	0	0	2	1426.85	417	429
Male	angiotensinogen	IPI00654069	52653.2	0.998	2	2	3	1.4e-05	0.0892	NDLLTWIENPPPR	R	A	0.95	3.61	0.275	4.6	0	2	0	0	2	1564.81	359	371
Male	angiotensinogen	IPI00654069	52653.2	0.998	2	2	3	1.4e-05	0.0892	NLQDLLAEDKLPTLLGAEANLNNIGDTNPR	Y	V	0.95	4.42	0.372	0	0	0	1	0	1	3232.68	387	416
Male	angiotensinogen	IPI00654069	52653.2	1	3	3	7	3.55e-05	0.16	AIQGLLVTQGGSSSQTPLLQSIVVGLFTAPGFR	R	L	0.95	5.96	0.542	3.8	0	0	5	0	2	3342.84	181	213
Male	angiotensinogen	IPI00654069	52653.2	1	3	3	7	3.55e-05	0.16	HSFVQSLALFTPALFPR	K	S	0.95	6.91	0.542	10.3	0	1	0	0	2	1931.05	216	232
Male	angiotensinogen	IPI00654069	52653.2	1	3	3	7	3.55e-05	0.16	STCAQLENPSVETLPESTFEPVPIQAK	K	T	0.95	2.77	0.169	3.6	0	1	0	0	2	2972.46	45	71
Female	Carbonic anhydrase 6	IPI00114881	36331	1	19	20	166	0.000808	0.344	AFHFHWGGR	K	D	0.95	2.88	0.284	2.96	0	4	0	0	2	1114.53	108	116	IPI00420184
Female	Carbonic anhydrase 6	IPI00114881	36331	1	19	20	166	0.000808	0.344	AFHFHWGGRDWELSGSEHTIDGIR	K	S	0.95	4.07	0.408	0	0	0	1	0	2	2810.32	108	131	IPI00420184
Female	Carbonic anhydrase 6	IPI00114881	36331	1	19	20	166	0.000808	0.344	DIEKPGETTTL	K	K	0.95	2.86	0.193	0	0	3	0	0	1	1203.61	185	195
Female	Carbonic anhydrase 6	IPI00114881	36331	1	19	20	166	0.000808	0.344	DQKNGLAVLAVLFKIDEYAENTYY	K	S	0.95	3.46	0.374	0	0	3	0	0	1	2777.4	153	176
Female	Carbonic anhydrase 6	IPI00114881	36331	1	19	20	166	0.000808	0.344	DWELSGSEHTIDGIR	R	S	0.95	0	0	7.12	0	105	3	0	2	1714.8	117	131	IPI00420184
Female	Carbonic anhydrase 6	IPI00114881	36331	1	19	20	166	0.000808	0.344	ELSGSEHTIDGIR	W	S	0.95	3.22	0.376	0	0	4	0	0	1	1413.7	119	131
Female	Carbonic anhydrase 6	IPI00114881	36331	1	19	20	166	0.000808	0.344	HSDWSYSGDDGVGESQWSEQYPSCGGER	A	Q	0.95	7.11	0.687	0	0	0	7	0	1	3162.24	18	45
Female	Carbonic anhydrase 6	IPI00114881	36331	1	19	20	166	0.000808	0.344	IEKPGETTTLK	D	D	0.95	2.92	0.243	0	0	1	0	0	1	1216.68	186	196
Female	Carbonic anhydrase 6	IPI00114881	36331	1	19	20	166	0.000808	0.344	LSGSEHTIDGIR	E	S	0.95	3.48	0.31	0	0	6	0	0	1	1284.65	120	131
Female	Carbonic anhydrase 6	IPI00114881	36331	1	19	20	166	0.000808	0.344	NGLAVLAVLFK	K	I	0.95	3.04	0.062	3.29	0	1	0	0	2	1144.71	156	166	IPI00420184
Female	Carbonic anhydrase 6	IPI00114881	36331	1	19	20	166	0.000808	0.344	NGLAVLAVLFKIDEYAENTYYSDIISALK	K	D	0.95	5.8	0.513	5.36	0	0	3	0	2	3233.7	156	184	IPI00420184
Female	Carbonic anhydrase 6	IPI00114881	36331	1	19	20	166	0.000808	0.344	PGETTTLK	K	D	0.95	2.86	0.16	0	0	1	0	0	1	846.457	189	196
Female	Carbonic anhydrase 6	IPI00114881	36331	1	19	20	166	0.000808	0.344	SDIISALK	Y	D	0.95	2.9	0.124	0	0	1	0	0	1	846.494	177	184
Female	Carbonic anhydrase 6	IPI00114881	36331	1	19	20	166	0.000808	0.344	SGDDGVGESQWSEQYPSCGGER	Y	Q	0.95	5.06	0.543	0	0	4	0	0	1	2386.95	24	45
Female	Carbonic anhydrase 6	IPI00114881	36331	1	19	20	166	0.000808	0.344	SGSEHTIDGIR	L	S	0.95	3.23	0.316	0	0	6	0	0	1	1171.57	121	131
Female	Carbonic anhydrase 6	IPI00114881	36331	1	19	20	166	0.000808	0.344	SYSGDDGVGESQWSEQYPSCGGER	W	Q	0.95	5.2	0.491	0	0	5	0	0	1	2637.04	22	45
Female	Carbonic anhydrase 6	IPI00114881	36331	1	19	20	166	0.000808	0.344	TEEVMFNPSLKPL	K	S	0.95	4.69	0.41	0	0	4	0	0	1	1504.77	53	65
Female	Carbonic anhydrase 6	IPI00114881	36331	1	19	20	166	0.000808	0.344	WSEQYPSCGGER	Q	Q	0.95	4.51	0.372	0	0	2	0	0	1	1455.6	34	45
Female	Carbonic anhydrase 6	IPI00114881	36331	1	19	20	166	0.000808	0.344	YSDIISALK	Y	D	0.95	3.46	0.261	0	0	2	0	0	1	1009.56	176	184
Female	Carbonic anhydrase 6	IPI00114881	36331	1	16	17	196	0.000957	0.344	AFHFHWGGR	K	D	0.95	3.05	0.315	1.92	0	2	0	0	2	1114.53	108	116	IPI00420184
Female	Carbonic anhydrase 6	IPI00114881	36331	1	16	17	196	0.000957	0.344	AFHFHWGGRDWELSGSEHTIDGIR	K	S	0.95	5.93	0.524	4.19	0	0	3	0	2	2810.32	108	131	IPI00420184
Female	Carbonic anhydrase 6	IPI00114881	36331	1	16	17	196	0.000957	0.344	DQKNGLAVLAVLFKIDEYAENTYY	K	S	0.95	3.56	0.309	0	0	1	0	0	1	2777.4	153	176
Female	Carbonic anhydrase 6	IPI00114881	36331	1	16	17	196	0.000957	0.344	DWELSGSEHTIDGIR	R	S	0.95	5.23	0.452	11.6	0	123	8	0	2	1714.8	117	131	IPI00420184
Female	Carbonic anhydrase 6	IPI00114881	36331	1	16	17	196	0.000957	0.344	ELSGSEHTIDGIR	W	S	0.95	3.32	0.373	0	0	18	0	0	1	1413.7	119	131
Female	Carbonic anhydrase 6	IPI00114881	36331	1	16	17	196	0.000957	0.344	HSDWSYSGDDGVGESQWSEQYPSCGGER	A	Q	0.95	7.05	0.705	0	0	0	5	0	1	3162.24	18	45
Female	Carbonic anhydrase 6	IPI00114881	36331	1	16	17	196	0.000957	0.344	KIDEYAENTYYSDIISALK	F	D	0.95	3.98	0.591	0	0	1	0	0	1	2236.1	166	184
Female	Carbonic anhydrase 6	IPI00114881	36331	1	16	17	196	0.000957	0.344	LSGSEHTIDGIR	E	S	0.95	3.5	0.344	0	0	13	0	0	1	1284.65	120	131
Female	Carbonic anhydrase 6	IPI00114881	36331	1	16	17	196	0.000957	0.344	NGLAVLAVLFKIDEYAENTYYSDIISALK	K	D	0.95	6.19	0.542	3	0	0	4	0	2	3233.7	156	184	IPI00420184
Female	Carbonic anhydrase 6	IPI00114881	36331	1	16	17	196	0.000957	0.344	SDIISALK	Y	D	0.95	3	0.127	0	0	1	0	0	1	846.494	177	184
Female	Carbonic anhydrase 6	IPI00114881	36331	1	16	17	196	0.000957	0.344	SGDDGVGESQWSEQYPSCGGER	Y	Q	0.95	4.87	0.553	0	0	2	0	0	1	2386.95	24	45
Female	Carbonic anhydrase 6	IPI00114881	36331	1	16	17	196	0.000957	0.344	SGSEHTIDGIR	L	S	0.95	3.19	0.306	0	0	3	0	0	1	1171.57	121	131
Female	Carbonic anhydrase 6	IPI00114881	36331	1	16	17	196	0.000957	0.344	SIMEAHFVHF	R	N	0.95	3.36	0.259	0	0	1	0	0	1	1217.58	132	141
Female	Carbonic anhydrase 6	IPI00114881	36331	1	16	17	196	0.000957	0.344	SIMEAHFVHFNK	R	E	0.95	3.94	0.304	2.44	0	4	0	0	2	1475.71	132	143	IPI00420184
Female	Carbonic anhydrase 6	IPI00114881	36331	1	16	17	196	0.000957	0.344	TEEVMFNPSLKPL	K	S	0.95	4.41	0.369	0	0	5	0	0	1	1504.77	53	65
Female	Carbonic anhydrase 6	IPI00114881	36331	1	16	17	196	0.000957	0.344	YSDIISALK	Y	D	0.95	3.37	0.298	0	0	2	0	0	1	1009.56	176	184
Female	Carbonic anhydrase 6	IPI00114881	36331	1	23	27	575	0.00355	0.584	AFHFHWGGR	K	D	0.95	3.03	0.275	3	13	14	0	0	2	1114.53	108	116	IPI00420184
Female	Carbonic anhydrase 6	IPI00114881	36331	1	23	27	575	0.00355	0.584	DIEKPGETTTLK	K	D	0.95	2.58	0.0979	2.33	0	1	0	0	2	1331.71	185	196
Female	Carbonic anhydrase 6	IPI00114881	36331	1	23	27	575	0.00355	0.584	DQKNGLAVLAVLFK	K	I	0.95	0	0	3.66	0	4	0	0	2	1515.89	153	166	IPI00420184
Female	Carbonic anhydrase 6	IPI00114881	36331	1	23	27	575	0.00355	0.584	DVHHYYTYPGSL	K	T	0.95	3.35	0.292	0	0	2	0	0	1	1451.66	207	218
Female	Carbonic anhydrase 6	IPI00114881	36331	1	23	27	575	0.00355	0.584	DVHHYYTYPGSLTTPPCTEN	K	V	0.95	4.72	0.281	0	0	1	0	0	1	2352.02	207	226
Female	Carbonic anhydrase 6	IPI00114881	36331	1	23	27	575	0.00355	0.584	DVHHYYTYPGSLTTPPCTENVQWF	K	V	0.95	3.73	0.513	0	0	14	0	0	1	2912.3	207	230
Female	Carbonic anhydrase 6	IPI00114881	36331	1	23	27	575	0.00355	0.584	DVHHYYTYPGSLTTPPCTENVQWFVLR	K	D	0.95	0	0	9.34	0	0	88	0	2	3280.55	207	233	IPI00420184
Female	Carbonic anhydrase 6	IPI00114881	36331	1	23	27	575	0.00355	0.584	DWELSGSEHTIDGIR	R	S	0.95	0	0	8.07	0	193	0	0	2	1714.8	117	131	IPI00420184
Female	Carbonic anhydrase 6	IPI00114881	36331	1	23	27	575	0.00355	0.584	ELSGSEHTIDGIR	W	S	0.95	3.39	0.307	0	0	1	0	0	1	1413.7	119	131
Female	Carbonic anhydrase 6	IPI00114881	36331	1	23	27	575	0.00355	0.584	EVMFNPSLKPLSLVNYEK	E	E	0.95	5.03	0.446	0	0	2	0	0	1	2108.11	55	72
Female	Carbonic anhydrase 6	IPI00114881	36331	1	23	27	575	0.00355	0.584	FHFHWGGR	A	D	0.95	3	0.203	0	0	1	0	0	1	1043.5	109	116
Female	Carbonic anhydrase 6	IPI00114881	36331	1	23	27	575	0.00355	0.584	HSDWSYSGDDGVGESQWSEQYPSCGGER	A	Q	0.95	6.29	0.655	0	0	0	2	0	1	3162.24	18	45
Female	Carbonic anhydrase 6	IPI00114881	36331	1	23	27	575	0.00355	0.584	IDEYAENTYYSDIISALK	K	D	0.95	0	0	14	0	33	0	0	2	2108.01	167	184	IPI00420184
Female	Carbonic anhydrase 6	IPI00114881	36331	1	23	27	575	0.00355	0.584	LSGSEHTIDGIR	E	S	0.95	3.51	0.344	0	0	1	0	0	1	1284.65	120	131
Female	Carbonic anhydrase 6	IPI00114881	36331	1	23	27	575	0.00355	0.584	MEAHFVHFNK	I	E	0.95	3.43	0.248	0	0	5	0	0	1	1259.6	134	143
Female	Carbonic anhydrase 6	IPI00114881	36331	1	23	27	575	0.00355	0.584	NGLAVLAVLFK	K	I	0.95	4.02	0.27	5.82	33	16	0	0	2	1144.71	156	166	IPI00420184
Female	Carbonic anhydrase 6	IPI00114881	36331	1	23	27	575	0.00355	0.584	PPCTENVQWFVLR	T	D	0.95	5.06	0.48	0	0	23	0	0	1	1645.82	221	233
Female	Carbonic anhydrase 6	IPI00114881	36331	1	23	27	575	0.00355	0.584	SGSEHTIDGIR	L	S	0.95	3.53	0.265	0	0	3	0	0	1	1171.57	121	131
Female	Carbonic anhydrase 6	IPI00114881	36331	1	23	27	575	0.00355	0.584	SIMEAHFVHFNK	R	E	0.95	4.43	0.397	4.59	7	84	0	0	2	1475.71	132	143	IPI00420184
Female	Carbonic anhydrase 6	IPI00114881	36331	1	23	27	575	0.00355	0.584	SIMEAHFVHFNKEYGTYENAK	R	D	0.95	5.03	0.455	4.55	0	0	5	0	2	2515.17	132	152	IPI00420184
Female	Carbonic anhydrase 6	IPI00114881	36331	1	23	27	575	0.00355	0.584	SIMEAHFVHFNKEYGTYENAKD	R	Q	0.95	4.07	0.337	0	0	0	2	0	1	2646.19	132	153
Female	Carbonic anhydrase 6	IPI00114881	36331	1	23	27	575	0.00355	0.584	TEEVMFNPSLKPLSLVNYEK	K	E	0.95	6.33	0.437	5.96	0	11	7	0	2	2338.2	53	72	IPI00420184
Female	Carbonic anhydrase 6	IPI00114881	36331	1	23	27	575	0.00355	0.584	VVEANFLNVPDMYSSYHLYPK	R	N	0.95	3.24	0.27	3.39	0	0	9	0	2	2486.21	272	292
Male	Carbonic anhydrase 6	IPI00114881	36331	1	15	16	76	0.000363	0.366	AFHFHWGGR	K	D	0.95	3	0.276	2.82	0	3	0	0	2	1114.53	108	116	IPI00420184
Male	Carbonic anhydrase 6	IPI00114881	36331	1	15	16	76	0.000363	0.366	AFHFHWGGRDWELSGSEHTIDGIR	K	S	0.95	6.26	0.447	5	0	0	1	0	2	2810.32	108	131	IPI00420184
Male	Carbonic anhydrase 6	IPI00114881	36331	1	15	16	76	0.000363	0.366	DQKNGLAVLAVLFKIDEYAENTYY	K	S	0.95	2.67	0.218	0	0	1	0	0	1	2777.4	153	176
Male	Carbonic anhydrase 6	IPI00114881	36331	1	15	16	76	0.000363	0.366	DWELSGSEHTIDGIR	R	S	0.95	5.1	0.477	9.54	0	39	1	0	2	1714.8	117	131	IPI00420184
Male	Carbonic anhydrase 6	IPI00114881	36331	1	15	16	76	0.000363	0.366	GSEHTIDGIR	S	S	0.95	2.78	0.208	0	0	1	0	0	1	1084.54	122	131
Male	Carbonic anhydrase 6	IPI00114881	36331	1	15	16	76	0.000363	0.366	HSDWSYSGDDGVGESQWSEQYPSCGGER	A	Q	0.95	7.35	0.677	0	0	0	4	0	1	3162.24	18	45
Male	Carbonic anhydrase 6	IPI00114881	36331	1	15	16	76	0.000363	0.366	KPLSLVNYEK	L	E	0.95	3.5	0.349	0	0	3	0	0	1	1190.68	63	72
Male	Carbonic anhydrase 6	IPI00114881	36331	1	15	16	76	0.000363	0.366	NGLAVLAVLFK	K	I	0.95	3.93	0.185	5.41	0	1	0	0	2	1144.71	156	166	IPI00420184
Male	Carbonic anhydrase 6	IPI00114881	36331	1	15	16	76	0.000363	0.366	SDIISALK	Y	D	0.95	2.8	0.13	0	0	1	0	0	1	846.494	177	184
Male	Carbonic anhydrase 6	IPI00114881	36331	1	15	16	76	0.000363	0.366	SGDDGVGESQWSEQYPSCGGER	Y	Q	0.95	5.19	0.595	0	0	5	0	0	1	2386.95	24	45
Male	Carbonic anhydrase 6	IPI00114881	36331	1	15	16	76	0.000363	0.366	SIMEAHFVHF	R	N	0.95	2.96	0.372	0	0	1	0	0	1	1233.57	132	141
Male	Carbonic anhydrase 6	IPI00114881	36331	1	15	16	76	0.000363	0.366	SIMEAHFVHFNK	R	E	0.95	4.19	0.349	4.48	0	3	0	0	2	1475.71	132	143	IPI00420184
Male	Carbonic anhydrase 6	IPI00114881	36331	1	15	16	76	0.000363	0.366	SLVNYEK	L	E	0.95	2.56	0.103	0	0	1	0	0	1	852.447	66	72
Male	Carbonic anhydrase 6	IPI00114881	36331	1	15	16	76	0.000363	0.366	TEEVMFNPSLKPL	K	S	0.95	4.78	0.394	0	0	8	0	0	1	1504.77	53	65
Male	Carbonic anhydrase 6	IPI00114881	36331	1	15	16	76	0.000363	0.366	YSDIISALK	Y	D	0.95	3.51	0.253	0	0	3	0	0	1	1009.56	176	184
Male	Carbonic anhydrase 6	IPI00114881	36331	1	20	21	154	0.00072	0.429	AFHFHWGGR	K	D	0.95	2.75	0.304	3	0	6	0	0	2	1114.53	108	116	IPI00420184
Male	Carbonic anhydrase 6	IPI00114881	36331	1	20	21	154	0.00072	0.429	AFHFHWGGRDWELSGSEHTIDGIR	K	S	0.95	6.73	0.488	2.13	0	0	1	0	2	2810.32	108	131	IPI00420184
Male	Carbonic anhydrase 6	IPI00114881	36331	1	20	21	154	0.00072	0.429	DIEKPGETTTLK	K	D	0.95	3.11	0.146	3.55	0	1	0	0	2	1331.71	185	196
Male	Carbonic anhydrase 6	IPI00114881	36331	1	20	21	154	0.00072	0.429	DQKNGLAVLAVLFKIDEYAENTYY	K	S	0.95	4.3	0.368	0	0	2	0	0	1	2777.4	153	176
Male	Carbonic anhydrase 6	IPI00114881	36331	1	20	21	154	0.00072	0.429	DWELSGSEHTIDGIR	R	S	0.95	4.96	0.466	10	0	76	1	0	2	1714.8	117	131	IPI00420184
Male	Carbonic anhydrase 6	IPI00114881	36331	1	20	21	154	0.00072	0.429	ELSGSEHTIDGIR	W	S	0.95	3.47	0.36	0	0	3	0	0	1	1413.7	119	131
Male	Carbonic anhydrase 6	IPI00114881	36331	1	20	21	154	0.00072	0.429	GSEHTIDGIR	S	S	0.95	2.98	0.287	0	0	3	0	0	1	1084.54	122	131
Male	Carbonic anhydrase 6	IPI00114881	36331	1	20	21	154	0.00072	0.429	HSDWSYSGDDGVGESQWSEQYPSCGGER	A	Q	0.95	7.2	0.677	0	0	0	9	0	1	3162.24	18	45
Male	Carbonic anhydrase 6	IPI00114881	36331	1	20	21	154	0.00072	0.429	IDEYAENTYY	K	S	0.95	3.59	0.287	0	0	2	0	0	1	1280.53	167	176
Male	Carbonic anhydrase 6	IPI00114881	36331	1	20	21	154	0.00072	0.429	LSGSEHTIDGIR	E	S	0.95	3.34	0.323	0	0	3	0	0	1	1284.65	120	131
Male	Carbonic anhydrase 6	IPI00114881	36331	1	20	21	154	0.00072	0.429	NGLAVLAVLFK	K	I	0.95	4.18	0.241	5.96	0	8	0	0	2	1144.71	156	166	IPI00420184
Male	Carbonic anhydrase 6	IPI00114881	36331	1	20	21	154	0.00072	0.429	NGLAVLAVLFKIDEYAENTYYSDIISALK	K	D	0.95	6.24	0.534	4.28	0	0	6	0	2	3233.7	156	184	IPI00420184
Male	Carbonic anhydrase 6	IPI00114881	36331	1	20	21	154	0.00072	0.429	SGDDGVGESQWSEQYPSCGGER	Y	Q	0.95	5.41	0.595	0	0	13	0	0	1	2386.95	24	45
Male	Carbonic anhydrase 6	IPI00114881	36331	1	20	21	154	0.00072	0.429	SGSEHTIDGIR	L	S	0.95	3.61	0.265	0	0	3	0	0	1	1171.57	121	131
Male	Carbonic anhydrase 6	IPI00114881	36331	1	20	21	154	0.00072	0.429	SIMEAHFVHFNK	R	E	0.95	4.4	0.334	7.89	0	2	0	0	2	1459.72	132	143	IPI00420184
Male	Carbonic anhydrase 6	IPI00114881	36331	1	20	21	154	0.00072	0.429	SLVNYEK	L	E	0.95	2.64	0.135	0	0	1	0	0	1	852.447	66	72
Male	Carbonic anhydrase 6	IPI00114881	36331	1	20	21	154	0.00072	0.429	STQPNNHR	R	V	0.95	2.64	0.288	2.11	0	2	0	0	2	953.455	264	271	IPI00420184
Male	Carbonic anhydrase 6	IPI00114881	36331	1	20	21	154	0.00072	0.429	TEEVMFNPSLKPL	K	S	0.95	4.72	0.389	0	0	6	0	0	1	1504.77	53	65
Male	Carbonic anhydrase 6	IPI00114881	36331	1	20	21	154	0.00072	0.429	WSEQYPSCGGER	Q	Q	0.95	4.51	0.389	0	0	3	0	0	1	1455.6	34	45
Male	Carbonic anhydrase 6	IPI00114881	36331	1	20	21	154	0.00072	0.429	YSDIISALK	Y	D	0.95	3.62	0.284	0	0	3	0	0	1	1009.56	176	184
Male	Carbonic anhydrase 6	IPI00114881	36331	1	25	32	809	0.00411	0.543	DQKNGLAVLAVLFK	K	I	0.95	3.34	0.151	1.59	0	1	0	0	2	1515.89	153	166	IPI00420184
Male	Carbonic anhydrase 6	IPI00114881	36331	1	25	32	809	0.00411	0.543	DVHHYYTYPGSL	K	T	0.95	2.97	0.202	0	0	1	0	0	1	1451.66	207	218
Male	Carbonic anhydrase 6	IPI00114881	36331	1	25	32	809	0.00411	0.543	DVHHYYTYPGSLTTPPCTENVQWF	K	V	0.95	3.69	0.515	0	0	15	0	0	1	2912.3	207	230
Male	Carbonic anhydrase 6	IPI00114881	36331	1	25	32	809	0.00411	0.543	DVHHYYTYPGSLTTPPCTENVQWFVLR	K	D	0.95	0	0	9.74	0	0	28	0	2	3280.55	207	233	IPI00420184
Male	Carbonic anhydrase 6	IPI00114881	36331	1	25	32	809	0.00411	0.543	DWELSGSEHTIDGIR	R	S	0.95	0	0	8.05	0	353	0	0	2	1714.8	117	131	IPI00420184
Male	Carbonic anhydrase 6	IPI00114881	36331	1	25	32	809	0.00411	0.543	EAHFVHFNK	M	E	0.95	2.51	0.237	0	0	1	0	0	1	1128.56	135	143
Male	Carbonic anhydrase 6	IPI00114881	36331	1	25	32	809	0.00411	0.543	ELSGSEHTIDGIR	W	S	0.95	3.33	0.362	0	0	4	0	0	1	1413.7	119	131
Male	Carbonic anhydrase 6	IPI00114881	36331	1	25	32	809	0.00411	0.543	FHFHWGGR	A	D	0.95	2.63	0.223	0	0	1	0	0	1	1043.5	109	116
Male	Carbonic anhydrase 6	IPI00114881	36331	1	25	32	809	0.00411	0.543	HSDWSYSGDDGVGESQWSEQYPSCGGER	A	Q	0.95	5.68	0.53	0	0	0	2	0	1	3162.24	18	45
Male	Carbonic anhydrase 6	IPI00114881	36331	1	25	32	809	0.00411	0.543	IDEYAENTYYSDIISALK	K	D	0.95	0	0	12.7	0	53	0	0	2	2108.01	167	184	IPI00420184
Male	Carbonic anhydrase 6	IPI00114881	36331	1	25	32	809	0.00411	0.543	IMEAHFVHFNK	S	E	0.95	4.68	0.283	0	0	5	0	0	1	1372.68	133	143
Male	Carbonic anhydrase 6	IPI00114881	36331	1	25	32	809	0.00411	0.543	KIDEYAENTYYSDIISALK	F	D	0.95	7.59	0.543	0	0	20	2	0	1	2236.1	166	184
Male	Carbonic anhydrase 6	IPI00114881	36331	1	25	32	809	0.00411	0.543	LKPLSLVNYEK	S	E	0.95	2.95	0.365	0	0	1	0	0	1	1303.76	62	72
Male	Carbonic anhydrase 6	IPI00114881	36331	1	25	32	809	0.00411	0.543	MEAHFVHFNK	I	E	0.95	3.45	0.262	0	0	2	0	0	1	1259.6	134	143
Male	Carbonic anhydrase 6	IPI00114881	36331	1	25	32	809	0.00411	0.543	MFNPSLKPLSLVNYEK	V	E	0.95	4.85	0.341	0	0	1	0	0	1	1880	57	72
Male	Carbonic anhydrase 6	IPI00114881	36331	1	25	32	809	0.00411	0.543	NGLAVLAVLFK	K	I	0.95	4.3	0.269	5.77	63	80	0	0	2	1144.71	156	166	IPI00420184
Male	Carbonic anhydrase 6	IPI00114881	36331	1	25	32	809	0.00411	0.543	PPCTENVQWFVLR	T	D	0.95	4.91	0.507	0	0	2	0	0	1	1645.82	221	233
Male	Carbonic anhydrase 6	IPI00114881	36331	1	25	32	809	0.00411	0.543	SGDDGVGESQWSEQYPSCGGER	Y	Q	0.95	4.85	0.562	0	0	5	1	0	1	2386.95	24	45
Male	Carbonic anhydrase 6	IPI00114881	36331	1	25	32	809	0.00411	0.543	SGSEHTIDGIR	L	S	0.95	3.38	0.315	0	0	2	0	0	1	1171.57	121	131
Male	Carbonic anhydrase 6	IPI00114881	36331	1	25	32	809	0.00411	0.543	SIMEAHFVHFNK	R	E	0.95	0	0	8.74	11	100	1	0	2	1459.72	132	143	IPI00420184
Male	Carbonic anhydrase 6	IPI00114881	36331	1	25	32	809	0.00411	0.543	SIMEAHFVHFNKEYGTYENAK	R	D	0.95	5.2	0.357	8.48	0	0	7	0	2	2515.17	132	152	IPI00420184
Male	Carbonic anhydrase 6	IPI00114881	36331	1	25	32	809	0.00411	0.543	SIMEAHFVHFNKEYGTYENAKD	R	Q	0.95	4.36	0.257	0	0	0	4	0	1	2630.2	132	153
Male	Carbonic anhydrase 6	IPI00114881	36331	1	25	32	809	0.00411	0.543	TEEVMFNPSLKPLSLVNYEK	K	E	0.95	0	0	7.64	0	18	18	0	2	2354.2	53	72	IPI00420184
Male	Carbonic anhydrase 6	IPI00114881	36331	1	25	32	809	0.00411	0.543	TYPGSLTTPPCTENVQWFVLR	Y	D	0.95	4.38	0.432	0	0	4	1	0	1	2466.21	213	233
Male	Carbonic anhydrase 6	IPI00114881	36331	1	25	32	809	0.00411	0.543	VVEANFLNVPDMYSSYHLYPK	R	N	0.95	2.89	0.273	3.06	0	0	2	0	2	2486.21	272	292
Female	carbonic anhydrase VI precursor	IPI00420184	36477.2	1	2	3	34	0.000166	0.208	AFHFHWGGR	K	D	0.95	2.88	0.284	2.96	0	4	0	0	2	1114.53	108	116	IPI00114881
Female	carbonic anhydrase VI precursor	IPI00420184	36477.2	1	2	3	34	0.000166	0.208	DWELSGSEHTIDGIR	R	S	0.95	4.6	0.431	11.8	0	99	3	0	2	1714.8	117	131	IPI00114881
Female	carbonic anhydrase VI precursor	IPI00420184	36477.2	1	2	3	34	0.000166	0.208	NGLAVLAVLFK	K	I	0.95	3.04	0.062	3.29	0	1	0	0	2	1144.71	156	166	IPI00114881
Female	carbonic anhydrase VI precursor	IPI00420184	36477.2	1	2	3	34	0.000166	0.208	NGLAVLAVLFKIDEYAENTYYSDIISALK	K	N	0.95	5.8	0.513	5.36	0	0	3	0	2	3233.7	156	184	IPI00114881
Female	carbonic anhydrase VI precursor	IPI00420184	36477.2	1	2	3	34	0.000166	0.208	NIEKPGETTTLK	K	D	0.95	3.41	0.285	2.74	12	19	0	0	2	1330.72	185	196
Female	carbonic anhydrase VI precursor	IPI00420184	36477.2	1	2	3	34	0.000166	0.208	NIEKPGETTTLKD	K	T	0.95	3.67	0.247	0	0	3	0	0	1	1445.75	185	197
Female	carbonic anhydrase VI precursor	IPI00420184	36477.2	1	3	4	47	0.00023	0.246	AFHFHWGGR	K	D	0.95	3.08	0.249	2.72	0	2	0	0	2	1114.53	108	116	IPI00114881
Female	carbonic anhydrase VI precursor	IPI00420184	36477.2	1	3	4	47	0.00023	0.246	AFHFHWGGRDWELSGSEHTIDGIR	K	S	0.95	6.92	0.495	4.8	0	0	2	0	2	2810.32	108	131	IPI00114881
Female	carbonic anhydrase VI precursor	IPI00420184	36477.2	1	3	4	47	0.00023	0.246	DWELSGSEHTIDGIR	R	S	0.95	5.23	0.452	11.6	0	112	8	0	2	1714.8	117	131	IPI00114881
Female	carbonic anhydrase VI precursor	IPI00420184	36477.2	1	3	4	47	0.00023	0.246	NGLAVLAVLFKIDEYAENTYYSDIISALK	K	N	0.95	5.58	0.477	6.38	0	0	4	0	2	3233.7	156	184	IPI00114881
Female	carbonic anhydrase VI precursor	IPI00420184	36477.2	1	3	4	47	0.00023	0.246	NIEKPGETTTL	K	K	0.95	3.09	0.276	0	0	3	0	0	1	1202.63	185	195
Female	carbonic anhydrase VI precursor	IPI00420184	36477.2	1	3	4	47	0.00023	0.246	NIEKPGETTTLK	K	D	0.95	3.17	0.223	2.92	13	29	0	0	2	1330.72	185	196
Female	carbonic anhydrase VI precursor	IPI00420184	36477.2	1	3	4	47	0.00023	0.246	NIEKPGETTTLKD	K	T	0.95	3.45	0.208	0	0	2	0	0	1	1445.75	185	197
Female	carbonic anhydrase VI precursor	IPI00420184	36477.2	1	3	4	47	0.00023	0.246	SIMEAHFVHFNK	R	E	0.95	3.93	0.284	6.38	0	4	0	0	2	1459.72	132	143	IPI00114881
Female	carbonic anhydrase VI precursor	IPI00420184	36477.2	1	6	8	196	0.00121	0.521	AFHFHWGGR	K	D	0.95	3.1	0.271	4.37	13	14	0	0	2	1114.53	108	116	IPI00114881
Female	carbonic anhydrase VI precursor	IPI00420184	36477.2	1	6	8	196	0.00121	0.521	DKVTLSK	R	A	0.95	1.89	0.137	1.07	1	0	0	0	2	790.468	234	240
Female	carbonic anhydrase VI precursor	IPI00420184	36477.2	1	6	8	196	0.00121	0.521	DQKNGLAVLAVLFK	K	I	0.95	3.52	0.177	5.38	0	4	0	0	2	1515.89	153	166	IPI00114881
Female	carbonic anhydrase VI precursor	IPI00420184	36477.2	1	6	8	196	0.00121	0.521	DVHHYYTYPGSLTTPPCTENVQWFVLR	K	D	0.95	0	0	9.34	0	0	88	0	2	3280.55	207	233	IPI00114881
Female	carbonic anhydrase VI precursor	IPI00420184	36477.2	1	6	8	196	0.00121	0.521	DWELSGSEHTIDGIR	R	S	0.95	4.84	0.448	12.1	0	184	0	0	2	1714.8	117	131	IPI00114881
Female	carbonic anhydrase VI precursor	IPI00420184	36477.2	1	6	8	196	0.00121	0.521	FLNVQDMYSSYHLYLK	N	N	0.95	5.36	0.326	0	0	9	0	0	1	2020.98	277	292
Female	carbonic anhydrase VI precursor	IPI00420184	36477.2	1	6	8	196	0.00121	0.521	IDEYAENTYYSDIISALK	K	N	0.95	0	0	14	0	33	0	0	2	2108.01	167	184	IPI00114881
Female	carbonic anhydrase VI precursor	IPI00420184	36477.2	1	6	8	196	0.00121	0.521	NGLAVLAVLFK	K	I	0.95	4.29	0.23	6.4	33	16	0	0	2	1144.71	156	166	IPI00114881
Female	carbonic anhydrase VI precursor	IPI00420184	36477.2	1	6	8	196	0.00121	0.521	NIEKPGETTTLK	K	D	0.95	2.61	0.0604	5.29	7	136	0	0	2	1330.72	185	196
Female	carbonic anhydrase VI precursor	IPI00420184	36477.2	1	6	8	196	0.00121	0.521	NIEKPGETTTLKD	K	T	0.95	3.35	0.215	0	0	1	0	0	1	1445.75	185	197
Female	carbonic anhydrase VI precursor	IPI00420184	36477.2	1	6	8	196	0.00121	0.521	SIMEAHFVHFNK	R	E	0.95	4.3	0.327	8.82	7	83	0	0	2	1459.72	132	143	IPI00114881
Female	carbonic anhydrase VI precursor	IPI00420184	36477.2	1	6	8	196	0.00121	0.521	SIMEAHFVHFNKEYGTYENAK	R	D	0.95	5.52	0.38	7.11	0	0	5	0	2	2515.17	132	152	IPI00114881
Female	carbonic anhydrase VI precursor	IPI00420184	36477.2	1	6	8	196	0.00121	0.521	SSYHLYLK	Y	N	0.95	3.22	0.265	0	0	2	0	0	1	1010.53	285	292
Female	carbonic anhydrase VI precursor	IPI00420184	36477.2	1	6	8	196	0.00121	0.521	TEEVMFNPSLKPLSLVNYEK	K	E	0.95	3.39	0.23	8.64	0	10	7	0	2	2338.2	53	72	IPI00114881
Female	carbonic anhydrase VI precursor	IPI00420184	36477.2	1	6	8	196	0.00121	0.521	VVEANFLNVQDMYSSYHLYLK	R	N	0.95	4.27	0.431	1.66	0	9	31	0	2	2533.24	272	292
Male	carbonic anhydrase VI precursor	IPI00420184	36477.2	1	2	3	36	0.000172	0.186	AFHFHWGGR	K	D	0.95	3	0.276	2.82	0	3	0	0	2	1114.53	108	116	IPI00114881
Male	carbonic anhydrase VI precursor	IPI00420184	36477.2	1	2	3	36	0.000172	0.186	AFHFHWGGRDWELSGSEHTIDGIR	K	S	0.95	6.26	0.447	5	0	0	1	0	2	2810.32	108	131	IPI00114881
Male	carbonic anhydrase VI precursor	IPI00420184	36477.2	1	2	3	36	0.000172	0.186	DWELSGSEHTIDGIR	R	S	0.95	5.32	0.449	11.5	0	36	1	0	2	1714.8	117	131	IPI00114881
Male	carbonic anhydrase VI precursor	IPI00420184	36477.2	1	2	3	36	0.000172	0.186	NGLAVLAVLFK	K	I	0.95	3.93	0.185	5.41	0	1	0	0	2	1144.71	156	166	IPI00114881
Male	carbonic anhydrase VI precursor	IPI00420184	36477.2	1	2	3	36	0.000172	0.186	NIEKPGETTTL	K	K	0.95	3.03	0.277	0	0	2	0	0	1	1202.63	185	195
Male	carbonic anhydrase VI precursor	IPI00420184	36477.2	1	2	3	36	0.000172	0.186	NIEKPGETTTLK	K	D	0.95	3.24	0.258	2.8	8	26	0	0	2	1330.72	185	196
Male	carbonic anhydrase VI precursor	IPI00420184	36477.2	1	2	3	36	0.000172	0.186	SIMEAHFVHFNK	R	E	0.95	4.23	0.284	5.92	0	3	0	0	2	1459.72	132	143	IPI00114881
Male	carbonic anhydrase VI precursor	IPI00420184	36477.2	1	2	3	28	0.000131	0.268	AFHFHWGGR	K	D	0.95	3.13	0.25	3.06	0	6	0	0	2	1114.53	108	116	IPI00114881
Male	carbonic anhydrase VI precursor	IPI00420184	36477.2	1	2	3	28	0.000131	0.268	AFHFHWGGRDWELSGSEHTIDGIR	K	S	0.95	6.73	0.488	2.13	0	0	1	0	2	2810.32	108	131	IPI00114881
Male	carbonic anhydrase VI precursor	IPI00420184	36477.2	1	2	3	28	0.000131	0.268	DWELSGSEHTIDGIR	R	S	0.95	4.56	0.49	12.7	0	73	1	0	2	1714.8	117	131	IPI00114881
Male	carbonic anhydrase VI precursor	IPI00420184	36477.2	1	2	3	28	0.000131	0.268	NGLAVLAVLFK	K	I	0.95	3.07	0.293	6.14	0	8	0	0	2	1144.71	156	166	IPI00114881
Male	carbonic anhydrase VI precursor	IPI00420184	36477.2	1	2	3	28	0.000131	0.268	NGLAVLAVLFKIDEYAENTYYSDIISALK	K	N	0.95	5.95	0.492	4.77	0	0	6	0	2	3233.7	156	184	IPI00114881
Male	carbonic anhydrase VI precursor	IPI00420184	36477.2	1	2	3	28	0.000131	0.268	NIEKPGETTTL	K	K	0.95	2.79	0.238	0	0	2	0	0	1	1202.63	185	195
Male	carbonic anhydrase VI precursor	IPI00420184	36477.2	1	2	3	28	0.000131	0.268	NIEKPGETTTLK	K	D	0.95	3.11	0.236	2.36	3	23	0	0	2	1330.72	185	196
Male	carbonic anhydrase VI precursor	IPI00420184	36477.2	1	2	3	28	0.000131	0.268	SIMEAHFVHFNK	R	E	0.95	4.4	0.334	7.89	0	2	0	0	2	1459.72	132	143	IPI00114881
Male	carbonic anhydrase VI precursor	IPI00420184	36477.2	1	2	3	28	0.000131	0.268	STQPNNHR	R	V	0.95	2.55	0.214	2.64	0	2	0	0	2	953.455	264	271	IPI00114881
Male	carbonic anhydrase VI precursor	IPI00420184	36477.2	1	5	6	85	0.000431	0.467	DQKNGLAVLAVLFK	K	I	0.95	3.34	0.151	1.59	0	1	0	0	2	1515.89	153	166	IPI00114881
Male	carbonic anhydrase VI precursor	IPI00420184	36477.2	1	5	6	85	0.000431	0.467	DVHHYYTYPGSLTTPPCTENVQWFVLR	K	D	0.95	0	0	9.74	0	0	28	0	2	3280.55	207	233	IPI00114881
Male	carbonic anhydrase VI precursor	IPI00420184	36477.2	1	5	6	85	0.000431	0.467	DWELSGSEHTIDGIR	R	S	0.95	5.27	0.403	11.6	0	343	0	0	2	1714.8	117	131	IPI00114881
Male	carbonic anhydrase VI precursor	IPI00420184	36477.2	1	5	6	85	0.000431	0.467	FLNVQDMYSSYHLYLK	N	N	0.95	5.44	0.295	0	0	2	0	0	1	2020.98	277	292
Male	carbonic anhydrase VI precursor	IPI00420184	36477.2	1	5	6	85	0.000431	0.467	IDEYAENTYYSDIISALK	K	N	0.95	6.27	0.42	13.9	0	53	0	0	2	2108.01	167	184	IPI00114881
Male	carbonic anhydrase VI precursor	IPI00420184	36477.2	1	5	6	85	0.000431	0.467	LNVQDMYSSYHLYLK	F	N	0.95	5.34	0.39	0	0	4	0	0	1	1873.92	278	292
Male	carbonic anhydrase VI precursor	IPI00420184	36477.2	1	5	6	85	0.000431	0.467	NGLAVLAVLFK	K	I	0.95	4.09	0.268	7.13	63	80	0	0	2	1144.71	156	166	IPI00114881
Male	carbonic anhydrase VI precursor	IPI00420184	36477.2	1	5	6	85	0.000431	0.467	NIEKPGETTTLK	K	D	0.95	2.25	0.0321	3.57	17	45	0	0	2	1330.72	185	196
Male	carbonic anhydrase VI precursor	IPI00420184	36477.2	1	5	6	85	0.000431	0.467	SIMEAHFVHFNK	R	E	0.95	0	0	8.74	11	99	1	0	2	1459.72	132	143	IPI00114881
Male	carbonic anhydrase VI precursor	IPI00420184	36477.2	1	5	6	85	0.000431	0.467	SIMEAHFVHFNKEYGTYENAK	R	D	0.95	5.2	0.357	8.48	0	0	6	0	2	2515.17	132	152	IPI00114881
Male	carbonic anhydrase VI precursor	IPI00420184	36477.2	1	5	6	85	0.000431	0.467	SSYHLYLK	Y	N	0.95	3.24	0.269	0	0	12	0	0	1	1010.53	285	292
Male	carbonic anhydrase VI precursor	IPI00420184	36477.2	1	5	6	85	0.000431	0.467	TEEVMFNPSLKPLSLVNYEK	K	E	0.95	3.37	0.231	10.5	0	17	18	0	2	2338.2	53	72	IPI00114881
Male	carbonic anhydrase VI precursor	IPI00420184	36477.2	1	5	6	85	0.000431	0.467	VVEANFLNVQDMYSSYHLYLK	R	N	0.95	3.71	0.387	4.7	0	0	5	0	2	2533.24	272	292
Male	Chitinase-3-like protein 4	IPI00314910	44959.1	0.998	2	2	3	1.4e-05	0.0522	PTEGSFKPGNIDPCLCTHL	R	I	0.95	3.84	0.109	0	0	0	1	0	0	2143	36	54
Male	Chitinase-3-like protein 4	IPI00314910	44959.1	0.998	2	2	3	1.4e-05	0.0522	PTEGSFKPGNIDPCLCTHLIY	R	A	0.95	3.6	0.319	0	0	0	2	0	0	2419.14	36	56
Female	Cysteine-rich secretory protein 1	IPI00132195	27661.2	1	3	3	7	3.41e-05	0.0492	KMLSCEHELLK	K	K	0.95	3.57	0.127	5.64	0	1	0	0	2	1387.71	220	230
Female	Cysteine-rich secretory protein 1	IPI00132195	27661.2	1	3	3	7	3.41e-05	0.0492	MLSCEHELLK	K	K	0.95	3.62	0.321	3.14	0	3	0	0	2	1259.61	221	230
Female	Cysteine-rich secretory protein 1	IPI00132195	27661.2	1	3	3	7	3.41e-05	0.0492	MLSCEHELLKK	K	G	0.95	3.98	0.245	3.8	0	3	0	0	2	1403.7	221	231
Female	Cysteine-rich secretory protein 1	IPI00132195	27661.2	1	5	5	7	3.42e-05	0.123	MLSCEHELLK	K	K	0.95	3.16	0.174	2.35	0	1	0	0	2	1275.61	221	230
Female	Cysteine-rich secretory protein 1	IPI00132195	27661.2	1	5	5	7	3.42e-05	0.123	MLSCEHELLKK	K	G	0.95	3.68	0.181	3.74	0	2	0	0	2	1403.7	221	231
Female	Cysteine-rich secretory protein 1	IPI00132195	27661.2	1	5	5	7	3.42e-05	0.123	PSGSDLLK	S	M	0.95	2.89	0.151	0	0	1	0	0	1	816.447	55	62
Female	Cysteine-rich secretory protein 1	IPI00132195	27661.2	1	5	5	7	3.42e-05	0.123	QVACGVAECPK	F	N	0.95	2.95	0.305	0	0	2	0	0	1	1218.56	149	159
Female	Cysteine-rich secretory protein 1	IPI00132195	27661.2	1	5	5	7	3.42e-05	0.123	SCEHELLKK	L	G	0.95	2.83	0.201	0	0	1	0	0	1	1143.58	223	231
Female	Cysteine-rich secretory protein 1	IPI00132195	27661.2	1	9	10	68	0.00042	0.27	CTFSHSPIELR	K	T	0.95	0	0	5.41	0	17	0	0	2	1346.65	80	90
Female	Cysteine-rich secretory protein 1	IPI00132195	27661.2	1	9	10	68	0.00042	0.27	DLTYDVGPK	K	Q	0.95	2.78	0.159	1.92	2	0	0	0	2	1007.51	122	130
Female	Cysteine-rich secretory protein 1	IPI00132195	27661.2	1	9	10	68	0.00042	0.27	HYCPVGNYQGR	C	L	0.95	3.16	0.376	0	0	7	0	0	1	1350.6	169	179
Female	Cysteine-rich secretory protein 1	IPI00132195	27661.2	1	9	10	68	0.00042	0.27	MLSCEHELLK	K	K	0.95	3.01	0.217	2.05	0	1	0	0	2	1275.61	221	230
Female	Cysteine-rich secretory protein 1	IPI00132195	27661.2	1	9	10	68	0.00042	0.27	MLSCEHELLKK	K	G	0.95	4.23	0.273	4.04	0	4	0	0	2	1387.71	221	231
Female	Cysteine-rich secretory protein 1	IPI00132195	27661.2	1	9	10	68	0.00042	0.27	SSYLASWSSAIQGWYNEYK	M	D	0.95	2.67	0.531	0	0	1	0	0	1	2240.03	103	121
Female	Cysteine-rich secretory protein 1	IPI00132195	27661.2	1	9	10	68	0.00042	0.27	VCHYCPVGNYQGR	Y	L	0.95	3.04	0.382	0	0	2	0	0	1	1609.7	167	179
Female	Cysteine-rich secretory protein 1	IPI00132195	27661.2	1	9	10	68	0.00042	0.27	YYVCHYCPVGNYQGR	Y	L	0.95	5.26	0.466	0	0	2	0	0	1	1935.83	165	179
Female	Cysteine-rich secretory protein 1	IPI00132195	27661.2	1	9	10	68	0.00042	0.27	YYYVCHYCPVGNYQGR	R	L	0.95	0	0	11.1	0	24	8	0	2	2098.89	164	179
Male	Cysteine-rich secretory protein 1	IPI00132195	27661.2	1	5	5	7	3.34e-05	0.082	KMLSCEHELLK	K	K	0.95	3.31	0	4.38	0	1	0	0	2	1387.71	220	230
Male	Cysteine-rich secretory protein 1	IPI00132195	27661.2	1	5	5	7	3.34e-05	0.082	LSCEHELLK	M	K	0.95	3.15	0.2	0	0	2	0	0	1	1128.57	222	230
Male	Cysteine-rich secretory protein 1	IPI00132195	27661.2	1	5	5	7	3.34e-05	0.082	MLSCEHELLK	K	K	0.95	3.85	0.315	3.1	0	2	0	0	2	1259.61	221	230
Male	Cysteine-rich secretory protein 1	IPI00132195	27661.2	1	5	5	7	3.34e-05	0.082	SCEHELLKK	L	G	0.95	2.91	0.212	0	0	1	0	0	1	1143.58	223	231
Male	Cysteine-rich secretory protein 1	IPI00132195	27661.2	1	5	5	7	3.34e-05	0.082	SHSPIELR	F	T	0.95	2.55	0.298	0	0	1	0	0	1	938.506	83	90
Male	Cysteine-rich secretory protein 1	IPI00132195	27661.2	1	11	13	79	0.000401	0.307	CTFSHSPIELR	K	T	0.95	3.93	0.359	4.04	1	26	0	0	2	1346.65	80	90
Male	Cysteine-rich secretory protein 1	IPI00132195	27661.2	1	11	13	79	0.000401	0.307	DAQVNAQQWADK	Y	C	0.949	3.96	0.279	0	1	0	0	0	1	1373.65	68	79
Male	Cysteine-rich secretory protein 1	IPI00132195	27661.2	1	11	13	79	0.000401	0.307	DLTYDVGPK	K	Q	0.95	2.71	0.165	1.41	2	0	0	0	2	1007.51	122	130
Male	Cysteine-rich secretory protein 1	IPI00132195	27661.2	1	11	13	79	0.000401	0.307	HYCPVGNYQGR	C	L	0.95	3.12	0.358	0	0	2	0	0	1	1350.6	169	179
Male	Cysteine-rich secretory protein 1	IPI00132195	27661.2	1	11	13	79	0.000401	0.307	LASWSSAIQGWYNEYK	Y	D	0.95	5.19	0.445	0	0	2	0	0	1	1902.9	106	121
Male	Cysteine-rich secretory protein 1	IPI00132195	27661.2	1	11	13	79	0.000401	0.307	MLSCEHELLK	K	K	0.95	3.09	0.21	3.82	0	1	0	0	2	1259.61	221	230
Male	Cysteine-rich secretory protein 1	IPI00132195	27661.2	1	11	13	79	0.000401	0.307	MLSCEHELLKK	K	G	0.95	3.85	0.225	4.09	0	1	0	0	2	1403.7	221	231
Male	Cysteine-rich secretory protein 1	IPI00132195	27661.2	1	11	13	79	0.000401	0.307	VCHYCPVGNYQGR	Y	L	0.95	4.07	0.371	0	0	9	0	0	1	1609.7	167	179
Male	Cysteine-rich secretory protein 1	IPI00132195	27661.2	1	11	13	79	0.000401	0.307	YVCHYCPVGNYQGR	Y	L	0.95	4.22	0.455	0	0	1	0	0	1	1772.76	166	179
Male	Cysteine-rich secretory protein 1	IPI00132195	27661.2	1	11	13	79	0.000401	0.307	YYVCHYCPVGNYQGR	Y	L	0.95	5.37	0.502	0	0	7	0	0	1	1935.83	165	179
Male	Cysteine-rich secretory protein 1	IPI00132195	27661.2	1	11	13	79	0.000401	0.307	YYYVCHYCPVGNYQGR	R	L	0.95	6.19	0.526	8.1	0	16	10	0	2	2098.89	164	179
Female	Dcpp2 protein	IPI00420775	16017.4	1	6	6	7	3.41e-05	0.241	EEHIIGVEGTYNPS	K	A	0.95	3.58	0.342	0	0	1	0	0	1	1544.72	62	75
Female	Dcpp2 protein	IPI00420775	16017.4	1	6	6	7	3.41e-05	0.241	EEHIIGVEGTYNPSA	K	L	0.95	4.81	0.376	0	0	1	0	0	1	1615.76	62	76
Female	Dcpp2 protein	IPI00420775	16017.4	1	6	6	7	3.41e-05	0.241	LSKEEHIIGVEGTYNPS	R	A	0.95	5.47	0.451	0	0	1	0	0	1	1872.93	59	75
Female	Dcpp2 protein	IPI00420775	16017.4	1	6	6	7	3.41e-05	0.241	LSKEEHIIGVEGTYNPSAL	R	T	0.95	4.84	0.454	0	0	2	0	0	1	2057.06	59	77
Female	Dcpp2 protein	IPI00420775	16017.4	1	6	6	7	3.41e-05	0.241	LSKEEHIIGVEGTYNPSALTQ	R	I	0.95	3.97	0.22	0	0	1	0	0	1	2286.16	59	79
Female	Dcpp2 protein	IPI00420775	16017.4	1	6	6	7	3.41e-05	0.241	QYSSYPDDPSLVLK	Y	G	0.95	3.7	0.388	0	0	1	0	0	1	1611.79	100	113
Female	Dcpp2 protein	IPI00420775	16017.4	0.998	2	2	5	2.44e-05	0.145	GACVSWR	K	A	0.95	2.09	-0.0234	3.46	1	2	0	0	2	835.389	114	120	IPI00154104,IPI00118977,IPI00469417,IPI00662097
Female	Dcpp2 protein	IPI00420775	16017.4	0.998	2	2	5	2.44e-05	0.145	QYSSYPDDPSLVLK	Y	G	0.95	4.32	0.394	0	0	3	0	0	1	1611.79	100	113
Female	Dcpp2 protein	IPI00420775	16017.4	0.998	2	2	5	2.44e-05	0.145	SSYPDDPSLVLK	Y	G	0.95	2.82	0.346	0	0	2	0	0	1	1320.67	102	113
Male	Dcpp2 protein	IPI00420775	16017.4	1	4	4	15	7.17e-05	0.276	EEHIIGVEGTYNPSAL	K	T	0.95	3.87	0.455	0	0	2	0	0	1	1728.84	62	77
Male	Dcpp2 protein	IPI00420775	16017.4	1	4	4	15	7.17e-05	0.276	GACVSWR	K	A	0.95	2.06	0	3.35	2	0	0	0	2	835.389	114	120	IPI00154104,IPI00118977,IPI00469417,IPI00662097
Male	Dcpp2 protein	IPI00420775	16017.4	1	4	4	15	7.17e-05	0.276	LSKEEHIIGVEGTYNPS	R	A	0.95	5.34	0.38	0	0	3	0	0	1	1872.93	59	75
Male	Dcpp2 protein	IPI00420775	16017.4	1	4	4	15	7.17e-05	0.276	LSKEEHIIGVEGTYNPSAL	R	T	0.95	5.19	0.443	0	0	3	0	0	1	2057.06	59	77
Male	Dcpp2 protein	IPI00420775	16017.4	1	4	4	15	7.17e-05	0.276	QYSSYPDDPSLVLK	Y	G	0.95	3.87	0.445	0	0	7	0	0	1	1611.79	100	113
Male	Dcpp2 protein	IPI00420775	16017.4	1	6	6	13	6.08e-05	0.269	EEHIIGVEGTY	K	N	0.95	3	0.242	0	0	2	0	0	1	1246.6	62	72
Male	Dcpp2 protein	IPI00420775	16017.4	1	6	6	13	6.08e-05	0.269	EEHIIGVEGTYNPS	K	A	0.95	3.19	0.257	0	0	1	0	0	1	1544.72	62	75
Male	Dcpp2 protein	IPI00420775	16017.4	1	6	6	13	6.08e-05	0.269	EEHIIGVEGTYNPSAL	K	T	0.95	4.25	0.4	0	0	1	0	0	1	1728.84	62	77
Male	Dcpp2 protein	IPI00420775	16017.4	1	6	6	13	6.08e-05	0.269	EEHIIGVEGTYNPSALTQ	K	I	0.95	5.49	0.362	0	0	3	0	0	1	1957.95	62	79
Male	Dcpp2 protein	IPI00420775	16017.4	1	6	6	13	6.08e-05	0.269	GACVSWR	K	A	0.95	1.88	-0.0249	3	1	0	0	0	2	835.389	114	120	IPI00154104,IPI00118977,IPI00469417,IPI00662097
Male	Dcpp2 protein	IPI00420775	16017.4	1	6	6	13	6.08e-05	0.269	QYSSYPDDPSLVLK	Y	G	0.95	3.99	0.413	0	0	5	0	0	1	1611.79	100	113
Male	Dcpp2 protein	IPI00420775	16017.4	1	6	6	13	6.08e-05	0.269	SSYPDDPSLVLK	Y	G	0.95	2.56	0.267	0	0	1	0	0	1	1320.67	102	113
Female	DD72 protein	IPI00124867	16433	1	2	3	26	0.000127	0.0946	KQVVLGGVEPADPK	A	D	0.95	4.95	0.484	0	0	21	1	0	1	1436.81	34	47
Female	DD72 protein	IPI00124867	16433	1	2	3	26	0.000127	0.0946	QVVLGGVEPADPK	K	D	0.95	3.96	0.342	6.42	0	4	0	0	2	1308.72	35	47
Female	DD72 protein	IPI00124867	16433	1	3	4	19	9.28e-05	0.176	KQVVLGGVEPADPK	A	D	0.95	4.9	0.429	0	0	14	1	0	1	1436.81	34	47
Female	DD72 protein	IPI00124867	16433	1	3	4	19	9.28e-05	0.176	LMSASQQVVAGK	R	N	0.95	3.61	0.239	4.66	0	1	0	0	2	1218.65	77	88
Female	DD72 protein	IPI00124867	16433	1	3	4	19	9.28e-05	0.176	QVVLGGVEPADPK	K	D	0.95	3.94	0.32	4.54	0	3	0	0	2	1308.72	35	47
Female	DD72 protein	IPI00124867	16433	1	5	6	27	0.000167	0.412	KQVVLGGVEPADPK	A	D	0.95	4.98	0.427	0	0	12	0	0	1	1436.81	34	47
Female	DD72 protein	IPI00124867	16433	1	5	6	27	0.000167	0.412	TESNLVDCPFNEQPDQQK	K	R	0.95	0	0	7.92	0	3	0	0	2	2148.95	104	121
Female	DD72 protein	IPI00124867	16433	1	5	6	27	0.000167	0.412	TESNLVDCPFNEQPDQQKR	K	V	0.95	4.13	0.379	0	0	5	2	0	2	2305.05	104	122
Female	DD72 protein	IPI00124867	16433	1	5	6	27	0.000167	0.412	TYNDMDNDLYLSK	R	P	0.95	4.21	0.411	0	0	1	0	0	1	1591.7	61	73
Female	DD72 protein	IPI00124867	16433	1	5	6	27	0.000167	0.412	VICNFQINVAPWLNK	R	M	0.95	0	0	6.05	0	4	0	0	2	1815.96	123	137
Male	DD72 protein	IPI00124867	16433	1	3	3	7	3.34e-05	0.155	KQVVLGGVEPADPK	A	D	0.95	4.75	0.435	0	0	5	0	0	1	1436.81	34	47
Male	DD72 protein	IPI00124867	16433	1	3	3	7	3.34e-05	0.155	NEQPDQQKR	F	V	0.95	2.84	0.198	0	0	1	0	0	1	1142.56	114	122
Male	DD72 protein	IPI00124867	16433	1	3	3	7	3.34e-05	0.155	QVVLGGVEPADPK	K	D	0.95	3.68	0.291	6.46	0	1	0	0	2	1308.72	35	47
Male	DD72 protein	IPI00124867	16433	1	3	3	5	2.34e-05	0.162	KQVVLGGVEPADPK	A	D	0.95	4.94	0.433	0	0	3	0	0	1	1436.81	34	47
Male	DD72 protein	IPI00124867	16433	1	3	3	5	2.34e-05	0.162	QINVAPWLNK	F	M	0.95	2.76	0.209	0	0	1	0	0	1	1182.66	128	137
Male	DD72 protein	IPI00124867	16433	1	3	3	5	2.34e-05	0.162	QVVLGGVEPADPK	K	D	0.95	3.66	0.288	6.14	0	1	0	0	2	1308.72	35	47
Male	DD72 protein	IPI00124867	16433	1	4	5	39	0.000198	0.324	KQVVLGGVEPADPK	A	D	0.95	5.24	0.433	0	0	20	0	0	1	1436.81	34	47
Male	DD72 protein	IPI00124867	16433	1	4	5	39	0.000198	0.324	TESNLVDCPFNEQPDQQK	K	R	0.95	0	0	7	0	4	0	0	2	2148.95	104	121
Male	DD72 protein	IPI00124867	16433	1	4	5	39	0.000198	0.324	TESNLVDCPFNEQPDQQKR	K	V	0.95	4.33	0.44	0	0	6	2	0	2	2305.05	104	122
Male	DD72 protein	IPI00124867	16433	1	4	5	39	0.000198	0.324	VICNFQINVAPWLNK	R	M	0.95	0	0	6.82	0	7	0	0	2	1815.96	123	137
Female	demilune cell and parotid protein	IPI00118977	18587.6	1	12	14	155	0.000755	0.439	EEHIIAAQGTY	K	T	0.95	3.21	0.293	0	1	8	0	0	1	1231.6	88	98
Female	demilune cell and parotid protein	IPI00118977	18587.6	1	12	14	155	0.000755	0.439	EEHIIAAQGTYTPS	K	A	0.95	3.43	0.311	0	0	1	0	0	1	1516.73	88	101
Female	demilune cell and parotid protein	IPI00118977	18587.6	1	12	14	155	0.000755	0.439	EEHIIAAQGTYTPSALTQIIF	K	T	0.95	5.98	0.483	0	0	3	0	0	1	2303.19	88	108
Female	demilune cell and parotid protein	IPI00118977	18587.6	1	12	14	155	0.000755	0.439	HSCTSAPEGK	K	N	0.95	2.95	0.349	5.05	3	15	0	0	2	1073.47	34	43	IPI00154104,IPI00662097
Female	demilune cell and parotid protein	IPI00118977	18587.6	1	12	14	155	0.000755	0.439	LIVGIQLNYDDNK	R	D	0.95	4.89	0.426	4.72	0	11	0	0	2	1504.8	56	68
Female	demilune cell and parotid protein	IPI00118977	18587.6	1	12	14	155	0.000755	0.439	LIVGIQLNYDDNKDGQVY	R	G	0.95	5.6	0.488	0	0	40	0	0	1	2067.04	56	73
Female	demilune cell and parotid protein	IPI00118977	18587.6	1	12	14	155	0.000755	0.439	LSKEEHIIAAQ	R	G	0.95	3.53	0.222	0	0	9	0	0	1	1238.67	85	95
Female	demilune cell and parotid protein	IPI00118977	18587.6	1	12	14	155	0.000755	0.439	LSKEEHIIAAQGTY	R	T	0.95	4.48	0.311	0	0	3	0	0	1	1559.81	85	98
Female	demilune cell and parotid protein	IPI00118977	18587.6	1	12	14	155	0.000755	0.439	LSKEEHIIAAQGTYTPSALTQIIF	R	T	0.95	3.56	0.292	0	0	0	1	0	1	2631.4	85	108
Female	demilune cell and parotid protein	IPI00118977	18587.6	1	12	14	155	0.000755	0.439	LWGSENSSCVK	F	Y	0.95	3.61	0.381	0	0	42	0	0	1	1266.58	156	166
Female	demilune cell and parotid protein	IPI00118977	18587.6	1	12	14	155	0.000755	0.439	SSFPNDPSHVLK	Y	G	0.95	3	0.378	0	0	17	0	0	1	1327.66	128	139
Female	demilune cell and parotid protein	IPI00118977	18587.6	1	12	14	155	0.000755	0.439	WGSENSSCVK	L	Y	0.95	3.02	0.143	0	0	1	0	0	1	1153.49	157	166
Female	demilune cell and parotid protein	IPI00118977	18587.6	1	11	12	114	0.000557	0.503	AGGIKSILFLWGSENSSCVKYGHSG	R	-	0.95	3.77	0.428	0	0	0	1	0	2	2654.3	147	171
Female	demilune cell and parotid protein	IPI00118977	18587.6	1	11	12	114	0.000557	0.503	EEHIIAAQGTY	K	T	0.95	3.23	0.311	0	0	2	0	0	1	1231.6	88	98
Female	demilune cell and parotid protein	IPI00118977	18587.6	1	11	12	114	0.000557	0.503	GACVSWR	K	A	0.95	2.09	-0.0234	3.46	1	2	0	0	2	835.389	140	146	IPI00154104,IPI00469417,IPI00420775,IPI00662097
Female	demilune cell and parotid protein	IPI00118977	18587.6	1	11	12	114	0.000557	0.503	HSCTSAPEGK	K	N	0.95	2.77	0.228	3.4	0	16	0	0	2	1073.47	34	43	IPI00154104,IPI00662097
Female	demilune cell and parotid protein	IPI00118977	18587.6	1	11	12	114	0.000557	0.503	LIVGIQLNYDDNK	R	D	0.95	3.98	0.379	3.28	0	17	0	0	2	1504.8	56	68
Female	demilune cell and parotid protein	IPI00118977	18587.6	1	11	12	114	0.000557	0.503	LIVGIQLNYDDNKDGQVY	R	G	0.95	5.49	0.392	0	0	20	0	0	1	2067.04	56	73
Female	demilune cell and parotid protein	IPI00118977	18587.6	1	11	12	114	0.000557	0.503	LSKEEHIIAAQ	R	G	0.95	3.55	0.216	0	0	12	0	0	1	1238.67	85	95
Female	demilune cell and parotid protein	IPI00118977	18587.6	1	11	12	114	0.000557	0.503	LSKEEHIIAAQGTY	R	T	0.95	4.42	0.321	0	0	3	0	0	1	1559.81	85	98
Female	demilune cell and parotid protein	IPI00118977	18587.6	1	11	12	114	0.000557	0.503	LWGSENSSCVK	F	Y	0.95	3.57	0.421	0	0	18	0	0	1	1266.58	156	166
Female	demilune cell and parotid protein	IPI00118977	18587.6	1	11	12	114	0.000557	0.503	PNDPSHVLK	F	G	0.95	3.27	0.242	0	0	2	0	0	1	1006.53	131	139
Female	demilune cell and parotid protein	IPI00118977	18587.6	1	11	12	114	0.000557	0.503	SSFPNDPSHVLK	Y	G	0.95	2.87	0.327	0	0	20	0	0	1	1327.66	128	139
Female	demilune cell and parotid protein	IPI00118977	18587.6	1	11	13	314	0.00194	0.649	EEHIIAAQGTYTPSALTQIIF	K	T	0.95	6.48	0.476	0	0	5	0	0	1	2303.19	88	108
Female	demilune cell and parotid protein	IPI00118977	18587.6	1	11	13	314	0.00194	0.649	EEHIIAAQGTYTPSALTQIIFTTNQPR	K	Q	0.95	5.15	0.598	5.82	0	0	114	0	2	3000.54	88	114
Female	demilune cell and parotid protein	IPI00118977	18587.6	1	11	13	314	0.00194	0.649	GACVSWR	K	A	0.95	1.8	-0.0288	3.62	5	0	0	0	2	835.389	140	146	IPI00154104,IPI00469417,IPI00420775,IPI00662097
Female	demilune cell and parotid protein	IPI00118977	18587.6	1	11	13	314	0.00194	0.649	HSCTSAPEGK	K	N	0.95	2.6	0.27	3.43	0	7	0	0	2	1073.47	34	43	IPI00154104,IPI00662097
Female	demilune cell and parotid protein	IPI00118977	18587.6	1	11	13	314	0.00194	0.649	LIVGIQLNYDDNK	R	D	0.95	3.07	0.317	2.39	0	1	0	0	2	1504.8	56	68
Female	demilune cell and parotid protein	IPI00118977	18587.6	1	11	13	314	0.00194	0.649	LIVGIQLNYDDNKDGQVYGSTAGK	R	E	0.95	0	0	9.34	0	17	9	0	2	2568.3	56	79	IPI00662097
Female	demilune cell and parotid protein	IPI00118977	18587.6	1	11	13	314	0.00194	0.649	LSKEEHIIAAQGTYTPSALTQIIFTTNQPR	R	Q	0.95	5.95	0.511	9.72	0	0	20	0	2	3328.75	85	114
Female	demilune cell and parotid protein	IPI00118977	18587.6	1	11	13	314	0.00194	0.649	NYDDNKDGQVYGSTAGK	L	E	0.95	6.04	0.532	0	0	1	0	0	1	1831.81	63	79	IPI00420775
Female	demilune cell and parotid protein	IPI00118977	18587.6	1	11	13	314	0.00194	0.649	QLMVGYYVGNSEYSSFPNDPSHVLK	R	G	0.95	4.05	0.349	5.74	0	1	7	0	2	2831.34	115	139
Female	demilune cell and parotid protein	IPI00118977	18587.6	1	11	13	314	0.00194	0.649	QLMVGYYVGNSEYSSFPNDPSHVLKG	R	A	0.95	4	0.506	0	0	0	2	0	1	2888.36	115	140
Female	demilune cell and parotid protein	IPI00118977	18587.6	1	11	13	314	0.00194	0.649	SILFLWGSENSSCVK	K	Y	0.95	0	0	14.3	0	125	0	0	2	1726.85	152	166	IPI00469417,IPI00420775,IPI00662097
Male	demilune cell and parotid protein	IPI00118977	18587.6	1	14	15	111	0.00053	0.374	EEHIIAAQGTY	K	T	0.95	3.31	0.314	0	0	3	0	0	1	1231.6	88	98
Male	demilune cell and parotid protein	IPI00118977	18587.6	1	14	15	111	0.00053	0.374	EEHIIAAQGTYTPSAL	K	T	0.95	2.92	0.215	0	0	1	0	0	1	1700.85	88	103
Male	demilune cell and parotid protein	IPI00118977	18587.6	1	14	15	111	0.00053	0.374	GACVSWR	K	A	0.95	2.06	0	3.35	2	0	0	0	2	835.389	140	146	IPI00154104,IPI00469417,IPI00420775,IPI00662097
Male	demilune cell and parotid protein	IPI00118977	18587.6	1	14	15	111	0.00053	0.374	HSCTSAPEGK	K	N	0.95	3.04	0.34	6.19	3	6	0	0	2	1073.47	34	43	IPI00154104,IPI00662097
Male	demilune cell and parotid protein	IPI00118977	18587.6	1	14	15	111	0.00053	0.374	LSKEEHIIAA	R	Q	0.95	2.95	0.186	0	0	2	0	0	1	1110.62	85	94
Male	demilune cell and parotid protein	IPI00118977	18587.6	1	14	15	111	0.00053	0.374	LSKEEHIIAAQ	R	G	0.95	3.41	0.213	0	0	6	0	0	1	1238.67	85	95
Male	demilune cell and parotid protein	IPI00118977	18587.6	1	14	15	111	0.00053	0.374	LSKEEHIIAAQGTY	R	T	0.95	4.52	0.344	0	0	3	0	0	1	1559.81	85	98
Male	demilune cell and parotid protein	IPI00118977	18587.6	1	14	15	111	0.00053	0.374	LSKEEHIIAAQGTYTPS	R	A	0.95	4.35	0.448	0	0	1	0	0	1	1844.94	85	101
Male	demilune cell and parotid protein	IPI00118977	18587.6	1	14	15	111	0.00053	0.374	LSKEEHIIAAQGTYTPSA	R	L	0.95	5.46	0.453	0	0	1	0	0	1	1915.98	85	102
Male	demilune cell and parotid protein	IPI00118977	18587.6	1	14	15	111	0.00053	0.374	LSKEEHIIAAQGTYTPSAL	R	T	0.95	4.9	0.466	0	0	3	0	0	1	2029.06	85	103
Male	demilune cell and parotid protein	IPI00118977	18587.6	1	14	15	111	0.00053	0.374	LSKEEHIIAAQGTYTPSALTQIIF	R	T	0.95	4.27	0.533	0	0	0	4	0	1	2631.4	85	108
Male	demilune cell and parotid protein	IPI00118977	18587.6	1	14	15	111	0.00053	0.374	LWGSENSSCVK	F	Y	0.95	3.89	0.365	0	0	34	0	0	1	1266.58	156	166
Male	demilune cell and parotid protein	IPI00118977	18587.6	1	14	15	111	0.00053	0.374	PNDPSHVLK	F	G	0.95	3.29	0.212	0	0	3	0	0	1	1006.53	131	139
Male	demilune cell and parotid protein	IPI00118977	18587.6	1	14	15	111	0.00053	0.374	SSFPNDPSHVLK	Y	G	0.95	3.03	0.405	0	0	39	0	0	1	1327.66	128	139
Male	demilune cell and parotid protein	IPI00118977	18587.6	1	12	18	678	0.00317	0.538	EEHIIAAQGTY	K	T	0.95	3.46	0.364	0	2	7	0	0	1	1231.6	88	98
Male	demilune cell and parotid protein	IPI00118977	18587.6	1	12	18	678	0.00317	0.538	EEHIIAAQGTYTPSALTQIIF	K	T	0.95	6.37	0.532	0	0	39	0	0	1	2303.19	88	108
Male	demilune cell and parotid protein	IPI00118977	18587.6	1	12	18	678	0.00317	0.538	GACVSWR	K	A	0.95	1.88	-0.0249	3	1	0	0	0	2	835.389	140	146	IPI00154104,IPI00469417,IPI00420775,IPI00662097
Male	demilune cell and parotid protein	IPI00118977	18587.6	1	12	18	678	0.00317	0.538	HSCTSAPEGK	K	N	0.95	3.1	0.366	5.39	3	6	0	0	2	1073.47	34	43	IPI00154104,IPI00662097
Male	demilune cell and parotid protein	IPI00118977	18587.6	1	12	18	678	0.00317	0.538	LIVGIQLNYDDNK	R	D	0.95	0	0	8.21	0	358	0	0	2	1504.8	56	68
Male	demilune cell and parotid protein	IPI00118977	18587.6	1	12	18	678	0.00317	0.538	LIVGIQLNYDDNKDGQVY	R	G	0.95	5.68	0.483	0	0	179	1	0	1	2067.04	56	73
Male	demilune cell and parotid protein	IPI00118977	18587.6	1	12	18	678	0.00317	0.538	LSKEEHIIAAQ	R	G	0.95	3.53	0.201	0	0	3	0	0	1	1238.67	85	95
Male	demilune cell and parotid protein	IPI00118977	18587.6	1	12	18	678	0.00317	0.538	LSKEEHIIAAQGTYTPSALTQIIF	R	T	0.95	4.43	0.562	0	0	3	20	0	1	2631.4	85	108
Male	demilune cell and parotid protein	IPI00118977	18587.6	1	12	18	678	0.00317	0.538	LWGSENSSCVK	F	Y	0.95	3.82	0.395	0	1	41	0	0	1	1266.58	156	166
Male	demilune cell and parotid protein	IPI00118977	18587.6	1	12	18	678	0.00317	0.538	SILFLWGSENSSCVK	K	Y	0.95	3.59	0.345	0	0	1	0	0	2	1726.85	152	166	IPI00469417,IPI00420775,IPI00662097
Male	demilune cell and parotid protein	IPI00118977	18587.6	1	12	18	678	0.00317	0.538	SSFPNDPSHVLK	Y	G	0.95	2.68	0.368	0	1	11	0	0	1	1327.66	128	139
Male	demilune cell and parotid protein	IPI00118977	18587.6	1	12	18	678	0.00317	0.538	VGNSEYSSFPNDPSHVLK	Y	G	0.95	3.78	0.275	0	0	0	1	0	1	1976.94	122	139
Male	demilune cell and parotid protein	IPI00118977	18587.6	1	13	15	915	0.00464	0.649	EEHIIAAQGTYTPSALTQIIF	K	T	0.95	6.07	0.524	0	0	7	0	0	1	2303.19	88	108
Male	demilune cell and parotid protein	IPI00118977	18587.6	1	13	15	915	0.00464	0.649	EEHIIAAQGTYTPSALTQIIFTTNQPR	K	Q	0.95	5.27	0.548	6.34	0	0	143	0	2	3000.54	88	114
Male	demilune cell and parotid protein	IPI00118977	18587.6	1	13	15	915	0.00464	0.649	GACVSWR	K	A	0.95	1.98	0	4.35	11	0	0	0	2	835.389	140	146	IPI00154104,IPI00469417,IPI00420775,IPI00662097
Male	demilune cell and parotid protein	IPI00118977	18587.6	1	13	15	915	0.00464	0.649	HSCTSAPEGK	K	N	0.95	2.96	0.351	6.92	0	134	0	0	2	1073.47	34	43	IPI00154104,IPI00662097
Male	demilune cell and parotid protein	IPI00118977	18587.6	1	13	15	915	0.00464	0.649	ILFLWGSENSSCVK	S	Y	0.95	3.8	0.252	0	0	1	0	0	1	1639.82	153	166
Male	demilune cell and parotid protein	IPI00118977	18587.6	1	13	15	915	0.00464	0.649	LIVGIQLNYDDNK	R	D	0.95	0	0	8.8	0	8	0	0	2	1504.8	56	68
Male	demilune cell and parotid protein	IPI00118977	18587.6	1	13	15	915	0.00464	0.649	LIVGIQLNYDDNKDGQVYGSTAGK	R	E	0.95	6.34	0.558	11.4	0	57	1	0	2	2568.3	56	79	IPI00662097
Male	demilune cell and parotid protein	IPI00118977	18587.6	1	13	15	915	0.00464	0.649	LSKEEHIIAAQGTYTPSALTQIIF	R	T	0.95	3.77	0.401	0	0	0	2	0	1	2631.4	85	108
Male	demilune cell and parotid protein	IPI00118977	18587.6	1	13	15	915	0.00464	0.649	LSKEEHIIAAQGTYTPSALTQIIFTTNQPR	R	Q	0.95	0	0	10.7	0	0	35	0	2	3328.75	85	114
Male	demilune cell and parotid protein	IPI00118977	18587.6	1	13	15	915	0.00464	0.649	NYDDNKDGQVYGSTAGK	L	E	0.95	5.92	0.55	0	0	2	0	0	1	1831.81	63	79	IPI00420775
Male	demilune cell and parotid protein	IPI00118977	18587.6	1	13	15	915	0.00464	0.649	QLMVGYYVGNSEYSSFPNDPSHVLK	R	G	0.95	3.71	0.452	5.02	0	5	8	0	2	2831.34	115	139
Male	demilune cell and parotid protein	IPI00118977	18587.6	1	13	15	915	0.00464	0.649	SILFLWGSENSSCVK	K	Y	0.95	0	0	13.9	0	485	0	0	2	1726.85	152	166	IPI00469417,IPI00420775,IPI00662097
Male	demilune cell and parotid protein	IPI00118977	18587.6	1	13	15	915	0.00464	0.649	VGNSEYSSFPNDPSHVLK	Y	G	0.95	5.19	0.424	0	0	16	0	0	1	1976.94	122	139
Female	demilune cell and parotid protein 2	IPI00662097	18575.5	1	4	6	69	0.000336	0.363	EEHIIGVEGTYNPSALTQIVF	K	T	0.95	4.11	0.498	0	0	7	1	0	1	2317.17	88	108
Female	demilune cell and parotid protein 2	IPI00662097	18575.5	1	4	6	69	0.000336	0.363	EEHIIGVEGTYNPSALTQIVFTTTQPRLLMV	K	G	0.95	4.21	0.518	0	0	0	1	0	1	3473.8	88	118
Female	demilune cell and parotid protein 2	IPI00662097	18575.5	1	4	6	69	0.000336	0.363	HSCTSAPEGK	K	N	0.95	2.95	0.349	5.05	3	15	0	0	2	1073.47	34	43	IPI00154104,IPI00118977
Female	demilune cell and parotid protein 2	IPI00662097	18575.5	1	4	6	69	0.000336	0.363	LIVGIQLNYNDNEDGQVY	R	G	0.95	5.6	0.488	0	0	14	0	0	1	2067	56	73
Female	demilune cell and parotid protein 2	IPI00662097	18575.5	1	4	6	69	0.000336	0.363	LSKEEHIIGVEGTYNPSALTQIVF	R	T	0.95	4.94	0.516	0	0	42	4	0	1	2645.38	85	108
Female	demilune cell and parotid protein 2	IPI00662097	18575.5	1	3	4	25	0.000122	0.345	EEHIIGVEGTYNPSALTQIVF	K	T	0.95	5.38	0.5	0	0	8	0	0	1	2317.17	88	108
Female	demilune cell and parotid protein 2	IPI00662097	18575.5	1	3	4	25	0.000122	0.345	GACVSWR	K	A	0.95	2.09	-0.0234	3.46	1	2	0	0	2	835.389	140	146	IPI00154104,IPI00118977,IPI00469417,IPI00420775
Female	demilune cell and parotid protein 2	IPI00662097	18575.5	1	3	4	25	0.000122	0.345	HSCTSAPEGK	K	N	0.95	2.77	0.228	3.4	0	16	0	0	2	1073.47	34	43	IPI00154104,IPI00118977
Female	demilune cell and parotid protein 2	IPI00662097	18575.5	1	3	4	25	0.000122	0.345	LIVGIQLNYNDNEDGQVY	R	G	0.95	5.45	0.415	0	0	2	0	0	1	2067	56	73
Female	demilune cell and parotid protein 2	IPI00662097	18575.5	1	3	4	25	0.000122	0.345	LSKEEHIIGVEGTYNPSALTQIVF	R	T	0.95	4.39	0.511	0	0	13	2	0	1	2645.38	85	108
Female	demilune cell and parotid protein 2	IPI00662097	18575.5	1	5	5	68	0.00042	0.614	EEHIIGVEGTYNPSALTQIVF	K	T	0.95	6.53	0.504	0	0	7	0	0	1	2317.17	88	108
Female	demilune cell and parotid protein 2	IPI00662097	18575.5	1	5	5	68	0.00042	0.614	EEHIIGVEGTYNPSALTQIVFTTTQPR	K	L	0.95	4.02	0.392	3.22	0	0	42	0	2	3001.53	88	114
Female	demilune cell and parotid protein 2	IPI00662097	18575.5	1	5	5	68	0.00042	0.614	EGTYNPSALTQIVFTTTQPR	V	L	0.95	2.74	0.333	0	0	1	0	0	1	2224.13	95	114
Female	demilune cell and parotid protein 2	IPI00662097	18575.5	1	5	5	68	0.00042	0.614	GACVSWR	K	A	0.95	1.8	-0.0288	3.62	5	0	0	0	2	835.389	140	146	IPI00154104,IPI00118977,IPI00469417,IPI00420775
Female	demilune cell and parotid protein 2	IPI00662097	18575.5	1	5	5	68	0.00042	0.614	HSCTSAPEGK	K	N	0.95	2.6	0.27	3.43	0	7	0	0	2	1073.47	34	43	IPI00154104,IPI00118977
Female	demilune cell and parotid protein 2	IPI00662097	18575.5	1	5	5	68	0.00042	0.614	LIVGIQLNYNDNEDGQVYGSTAGK	R	V	0.95	3.31	0.404	3.85	0	15	6	0	2	2568.26	56	79	IPI00118977
Female	demilune cell and parotid protein 2	IPI00662097	18575.5	1	5	5	68	0.00042	0.614	LSKEEHIIGVEGTYNPSALTQIVFTTTQPR	R	L	0.95	5.58	0.5	6.04	0	0	16	0	2	3329.74	85	114
Female	demilune cell and parotid protein 2	IPI00662097	18575.5	1	5	5	68	0.00042	0.614	LVGNYQYSSYPDDPSLVLK	Y	G	0.95	5.78	0.475	0	0	2	0	0	1	2158.07	121	139
Female	demilune cell and parotid protein 2	IPI00662097	18575.5	1	5	5	68	0.00042	0.614	SILFLWGSENSSCVK	K	Y	0.95	0	0	14.3	0	122	0	0	2	1726.85	152	166	IPI00118977,IPI00469417,IPI00420775
Male	demilune cell and parotid protein 2	IPI00662097	18575.5	1	2	3	63	0.000301	0.24	EEHIIGVEGTYNPSALTQIVF	K	T	0.95	6.44	0.497	0	0	16	0	0	1	2317.17	88	108
Male	demilune cell and parotid protein 2	IPI00662097	18575.5	1	2	3	63	0.000301	0.24	GACVSWR	K	A	0.95	2.06	0	3.35	2	0	0	0	2	835.389	140	146	IPI00154104,IPI00118977,IPI00469417,IPI00420775
Male	demilune cell and parotid protein 2	IPI00662097	18575.5	1	2	3	63	0.000301	0.24	HSCTSAPEGK	K	N	0.95	3.04	0.34	6.19	3	6	0	0	2	1073.47	34	43	IPI00154104,IPI00118977
Male	demilune cell and parotid protein 2	IPI00662097	18575.5	1	2	3	63	0.000301	0.24	LSKEEHIIGVEGTYNPSALTQIVF	R	T	0.95	5.03	0.586	0	0	45	2	0	1	2645.38	85	108
Male	demilune cell and parotid protein 2	IPI00662097	18575.5	1	4	6	274	0.00128	0.345	EEHIIGVEGTYNPSALTQIVF	K	T	0.95	6.49	0.53	0	0	141	2	0	1	2317.17	88	108
Male	demilune cell and parotid protein 2	IPI00662097	18575.5	1	4	6	274	0.00128	0.345	GACVSWR	K	A	0.95	1.88	-0.0249	3	1	0	0	0	2	835.389	140	146	IPI00154104,IPI00118977,IPI00469417,IPI00420775
Male	demilune cell and parotid protein 2	IPI00662097	18575.5	1	4	6	274	0.00128	0.345	HSCTSAPEGK	K	N	0.95	3.1	0.366	5.39	3	6	0	0	2	1073.47	34	43	IPI00154104,IPI00118977
Male	demilune cell and parotid protein 2	IPI00662097	18575.5	1	4	6	274	0.00128	0.345	LIVGIQLNYNDNE	R	D	0.95	3.32	0.398	0	0	2	0	0	1	1504.76	56	68
Male	demilune cell and parotid protein 2	IPI00662097	18575.5	1	4	6	274	0.00128	0.345	LIVGIQLNYNDNEDGQVY	R	G	0.95	5.75	0.484	0	0	65	0	0	1	2067	56	73
Male	demilune cell and parotid protein 2	IPI00662097	18575.5	1	4	6	274	0.00128	0.345	LSKEEHIIGVEGTYNPSALTQIVF	R	T	0.95	5.22	0.573	0	0	63	1	0	1	2645.38	85	108
Male	demilune cell and parotid protein 2	IPI00662097	18575.5	1	4	4	98	0.000497	0.614	EEHIIGVEGTYNPSALTQIVF	K	T	0.95	6.3	0.495	0	0	16	0	0	1	2317.17	88	108
Male	demilune cell and parotid protein 2	IPI00662097	18575.5	1	4	4	98	0.000497	0.614	EEHIIGVEGTYNPSALTQIVFTTTQPR	K	L	0.95	2.87	0.398	5.15	0	0	53	0	2	3001.53	88	114
Male	demilune cell and parotid protein 2	IPI00662097	18575.5	1	4	4	98	0.000497	0.614	GACVSWR	K	A	0.95	1.98	0	4.35	11	0	0	0	2	835.389	140	146	IPI00154104,IPI00118977,IPI00469417,IPI00420775
Male	demilune cell and parotid protein 2	IPI00662097	18575.5	1	4	4	98	0.000497	0.614	HSCTSAPEGK	K	N	0.95	2.96	0.351	6.92	0	134	0	0	2	1073.47	34	43	IPI00154104,IPI00118977
Male	demilune cell and parotid protein 2	IPI00662097	18575.5	1	4	4	98	0.000497	0.614	LIVGIQLNYNDNEDGQVYGSTAGK	R	V	0.95	4.63	0.475	5.6	0	41	0	0	2	2568.26	56	79	IPI00118977
Male	demilune cell and parotid protein 2	IPI00662097	18575.5	1	4	4	98	0.000497	0.614	LSKEEHIIGVEGTYNPSALTQIVFTTTQPR	R	L	0.95	5.86	0.501	6.85	0	0	27	0	2	3329.74	85	114
Male	demilune cell and parotid protein 2	IPI00662097	18575.5	1	4	4	98	0.000497	0.614	LVGNYQYSSYPDDPSLVLK	Y	G	0.95	5.5	0.484	0	0	2	0	0	1	2158.07	121	139
Male	demilune cell and parotid protein 2	IPI00662097	18575.5	1	4	4	98	0.000497	0.614	SILFLWGSENSSCVK	K	Y	0.95	0	0	13.9	0	477	0	0	2	1726.85	152	166	IPI00118977,IPI00469417,IPI00420775
Female	demilune cell and parotid protein 3	IPI00469417	18620.3	1	8	10	56	0.000273	0.282	EEHITGVEGSYSPS	K	A	0.95	4.33	0.28	0	0	2	0	0	1	1491.66	87	100
Female	demilune cell and parotid protein 3	IPI00469417	18620.3	1	8	10	56	0.000273	0.282	EEHITGVEGSYSPSA	K	L	0.95	4.54	0.398	0	0	1	0	0	1	1562.7	87	101
Female	demilune cell and parotid protein 3	IPI00469417	18620.3	1	8	10	56	0.000273	0.282	EEHITGVEGSYSPSAL	K	T	0.95	4.46	0.445	0	0	4	0	0	1	1675.78	87	102
Female	demilune cell and parotid protein 3	IPI00469417	18620.3	1	8	10	56	0.000273	0.282	EEHITGVEGSYSPSALTQIVF	K	T	0.95	3.79	0.584	0	0	18	1	0	1	2264.11	87	107
Female	demilune cell and parotid protein 3	IPI00469417	18620.3	1	8	10	56	0.000273	0.282	HSCTSTPEEK	K	N	0.95	2.82	0.184	2.46	0	4	0	0	2	1175.5	34	43
Female	demilune cell and parotid protein 3	IPI00469417	18620.3	1	8	10	56	0.000273	0.282	LSKEEHITGVEGSYSPSAL	R	T	0.95	4.75	0.429	0	0	2	0	0	1	2003.99	84	102
Female	demilune cell and parotid protein 3	IPI00469417	18620.3	1	8	10	56	0.000273	0.282	LSKEEHITGVEGSYSPSALTQIVF	R	T	0.95	5.69	0.536	0	0	14	3	0	1	2592.32	84	107
Female	demilune cell and parotid protein 3	IPI00469417	18620.3	1	8	10	56	0.000273	0.282	QYSSYPDDPSFVLK	Y	G	0.95	4.02	0.446	0	0	7	0	0	1	1645.78	125	138
Female	demilune cell and parotid protein 3	IPI00469417	18620.3	1	6	7	33	0.000161	0.324	EEHITGVEGSYSPS	K	A	0.95	4.26	0.334	0	0	1	0	0	1	1491.66	87	100
Female	demilune cell and parotid protein 3	IPI00469417	18620.3	1	6	7	33	0.000161	0.324	EEHITGVEGSYSPSAL	K	T	0.95	4.62	0.479	0	0	2	0	0	1	1675.78	87	102
Female	demilune cell and parotid protein 3	IPI00469417	18620.3	1	6	7	33	0.000161	0.324	EEHITGVEGSYSPSALTQIVF	K	T	0.95	6.08	0.566	0	0	15	0	0	1	2264.11	87	107
Female	demilune cell and parotid protein 3	IPI00469417	18620.3	1	6	7	33	0.000161	0.324	GACVSWR	K	A	0.95	2.09	-0.0234	3.46	1	2	0	0	2	835.389	139	145	IPI00154104,IPI00118977,IPI00420775,IPI00662097
Female	demilune cell and parotid protein 3	IPI00469417	18620.3	1	6	7	33	0.000161	0.324	HSCTSTPEEK	K	N	0.95	3.09	0.108	1.38	0	1	0	0	2	1175.5	34	43
Female	demilune cell and parotid protein 3	IPI00469417	18620.3	1	6	7	33	0.000161	0.324	LSKEEHITGVEGSYSPSALTQIVF	R	T	0.95	4.73	0.546	0	0	5	1	0	1	2592.32	84	107
Female	demilune cell and parotid protein 3	IPI00469417	18620.3	1	6	7	33	0.000161	0.324	QYSSYPDDPSFVLK	Y	G	0.95	4.13	0.444	0	0	8	0	0	1	1645.78	125	138
Female	demilune cell and parotid protein 3	IPI00469417	18620.3	1	8	11	79	0.000488	0.647	EEHITGVEGSYSPSALTQIVF	K	T	0.95	6.18	0.553	0	0	3	0	0	1	2264.11	87	107
Female	demilune cell and parotid protein 3	IPI00469417	18620.3	1	8	11	79	0.000488	0.647	EEHITGVEGSYSPSALTQIVFTTTQPR	K	Q	0.95	5.86	0.601	14.8	0	11	22	0	2	2948.46	87	113
Female	demilune cell and parotid protein 3	IPI00469417	18620.3	1	8	11	79	0.000488	0.647	GACVSWR	K	A	0.95	1.8	-0.0288	3.62	5	0	0	0	2	835.389	139	145	IPI00154104,IPI00118977,IPI00420775,IPI00662097
Female	demilune cell and parotid protein 3	IPI00469417	18620.3	1	8	11	79	0.000488	0.647	HSCTSTPEEK	K	N	0.95	2.84	0.265	0	0	6	0	0	2	1175.5	34	43
Female	demilune cell and parotid protein 3	IPI00469417	18620.3	1	8	11	79	0.000488	0.647	HVGIYQYSSYPDDPSFVLK	Y	G	0.95	6.31	0.525	0	0	10	2	0	1	2215.07	120	138
Female	demilune cell and parotid protein 3	IPI00469417	18620.3	1	8	11	79	0.000488	0.647	LSKEEHITGVEGSYSPSALTQIVFTTTQPR	R	Q	0.95	5.85	0.453	8.4	0	0	5	0	2	3276.68	84	113
Female	demilune cell and parotid protein 3	IPI00469417	18620.3	1	8	11	79	0.000488	0.647	QLMVGYHVGIYQYSSYPDDPSFVLK	R	G	0.95	3.66	0.25	0	0	0	1	0	2	2906.41	114	138
Female	demilune cell and parotid protein 3	IPI00469417	18620.3	1	8	11	79	0.000488	0.647	SILFLWGSENSSCVK	K	Y	0.95	0	0	14.3	0	122	0	0	2	1726.85	151	165	IPI00118977,IPI00420775,IPI00662097
Female	demilune cell and parotid protein 3	IPI00469417	18620.3	1	8	11	79	0.000488	0.647	SIVGIQFNYDDKDGQVYGSTAGK	R	E	0.95	5.65	0.492	9.49	0	12	6	0	2	2462.18	56	78
Female	demilune cell and parotid protein 3	IPI00469417	18620.3	1	8	11	79	0.000488	0.647	YDDKDGQVYGSTAGK	N	E	0.95	4.12	0.405	0	0	1	0	0	1	1603.72	64	78
Male	demilune cell and parotid protein 3	IPI00469417	18620.3	1	9	10	80	0.000382	0.324	EEHITGVEGSYSPS	K	A	0.95	3.21	0.257	0	0	2	0	0	1	1491.66	87	100
Male	demilune cell and parotid protein 3	IPI00469417	18620.3	1	9	10	80	0.000382	0.324	EEHITGVEGSYSPSAL	K	T	0.95	4.38	0.491	0	0	6	0	0	1	1675.78	87	102
Male	demilune cell and parotid protein 3	IPI00469417	18620.3	1	9	10	80	0.000382	0.324	EEHITGVEGSYSPSALTQIVF	K	T	0.95	6.13	0.59	0	0	26	0	0	1	2264.11	87	107
Male	demilune cell and parotid protein 3	IPI00469417	18620.3	1	9	10	80	0.000382	0.324	GACVSWR	K	A	0.95	2.06	0	3.35	2	0	0	0	2	835.389	139	145	IPI00154104,IPI00118977,IPI00420775,IPI00662097
Male	demilune cell and parotid protein 3	IPI00469417	18620.3	1	9	10	80	0.000382	0.324	HSCTSTPEEK	K	N	0.95	3.26	0.334	3.15	0	3	0	0	2	1175.5	34	43
Male	demilune cell and parotid protein 3	IPI00469417	18620.3	1	9	10	80	0.000382	0.324	LSKEEHITGVEGSY	R	S	0.95	4.61	0.466	0	0	4	0	0	1	1548.75	84	97
Male	demilune cell and parotid protein 3	IPI00469417	18620.3	1	9	10	80	0.000382	0.324	LSKEEHITGVEGSYSPSAL	R	T	0.95	4.72	0.5	0	0	2	0	0	1	2003.99	84	102
Male	demilune cell and parotid protein 3	IPI00469417	18620.3	1	9	10	80	0.000382	0.324	LSKEEHITGVEGSYSPSALTQIVF	R	T	0.95	5.15	0.558	0	0	22	2	0	1	2592.32	84	107
Male	demilune cell and parotid protein 3	IPI00469417	18620.3	1	9	10	80	0.000382	0.324	QYSSYPDDPSFVLK	Y	G	0.95	4.06	0.423	0	0	7	0	0	1	1645.78	125	138
Male	demilune cell and parotid protein 3	IPI00469417	18620.3	1	9	10	80	0.000382	0.324	SSYPDDPSFVLK	Y	G	0.95	3.15	0.349	0	0	6	0	0	1	1354.65	127	138
Male	demilune cell and parotid protein 3	IPI00469417	18620.3	1	8	11	118	0.000552	0.324	EEHITGVEGSY	K	S	0.95	3.01	0.287	0	1	3	0	0	1	1220.54	87	97
Male	demilune cell and parotid protein 3	IPI00469417	18620.3	1	8	11	118	0.000552	0.324	EEHITGVEGSYSPSAL	K	T	0.95	4.62	0.409	0	0	2	0	0	1	1675.78	87	102
Male	demilune cell and parotid protein 3	IPI00469417	18620.3	1	8	11	118	0.000552	0.324	EEHITGVEGSYSPSALTQ	K	I	0.95	5.18	0.509	0	0	2	0	0	1	1904.89	87	104
Male	demilune cell and parotid protein 3	IPI00469417	18620.3	1	8	11	118	0.000552	0.324	EEHITGVEGSYSPSALTQIVF	K	T	0.95	6.43	0.578	0	0	61	0	0	1	2264.11	87	107
Male	demilune cell and parotid protein 3	IPI00469417	18620.3	1	8	11	118	0.000552	0.324	GACVSWR	K	A	0.95	1.88	-0.0249	3	1	0	0	0	2	835.389	139	145	IPI00154104,IPI00118977,IPI00420775,IPI00662097
Male	demilune cell and parotid protein 3	IPI00469417	18620.3	1	8	11	118	0.000552	0.324	HSCTSTPEEK	K	N	0.95	2.85	0.303	2.7	2	3	0	0	2	1175.5	34	43
Male	demilune cell and parotid protein 3	IPI00469417	18620.3	1	8	11	118	0.000552	0.324	LSKEEHITGVEGSYSPSALTQIVF	R	T	0.95	5.41	0.563	0	0	26	2	0	1	2592.32	84	107
Male	demilune cell and parotid protein 3	IPI00469417	18620.3	1	8	11	118	0.000552	0.324	QYSSYPDDPSFVLK	Y	G	0.95	4.15	0.443	0	0	6	0	0	1	1645.78	125	138
Male	demilune cell and parotid protein 3	IPI00469417	18620.3	1	8	11	118	0.000552	0.324	SSYPDDPSFVLK	Y	G	0.95	3.12	0.365	0	0	10	0	0	1	1354.65	127	138
Male	demilune cell and parotid protein 3	IPI00469417	18620.3	1	10	13	171	0.000868	0.647	EEHITGVEGSYSPSALTQIVF	K	T	0.95	6.41	0.565	0	0	4	0	0	1	2264.11	87	107
Male	demilune cell and parotid protein 3	IPI00469417	18620.3	1	10	13	171	0.000868	0.647	EEHITGVEGSYSPSALTQIVFTTTQPR	K	Q	0.95	6.02	0.577	15.3	0	14	50	0	2	2948.46	87	113
Male	demilune cell and parotid protein 3	IPI00469417	18620.3	1	10	13	171	0.000868	0.647	GACVSWR	K	A	0.95	1.98	0	4.35	11	0	0	0	2	835.389	139	145	IPI00154104,IPI00118977,IPI00420775,IPI00662097
Male	demilune cell and parotid protein 3	IPI00469417	18620.3	1	10	13	171	0.000868	0.647	HSCTSTPEEK	K	N	0.95	2.99	0.323	3.82	0	41	0	0	2	1175.5	34	43
Male	demilune cell and parotid protein 3	IPI00469417	18620.3	1	10	13	171	0.000868	0.647	HVGIYQYSSYPDDPSFVLK	Y	G	0.95	6.21	0.562	0	0	10	4	0	1	2215.07	120	138
Male	demilune cell and parotid protein 3	IPI00469417	18620.3	1	10	13	171	0.000868	0.647	LSKEEHITGVEGSYSPSALTQIVFTTTQPR	R	Q	0.95	5.97	0.536	8.52	0	0	5	0	2	3276.68	84	113
Male	demilune cell and parotid protein 3	IPI00469417	18620.3	1	10	13	171	0.000868	0.647	QLMVGYHVGIYQYSSYPDDPSFVLK	R	G	0.95	4.97	0.422	0	0	0	6	0	2	2906.41	114	138
Male	demilune cell and parotid protein 3	IPI00469417	18620.3	1	10	13	171	0.000868	0.647	SILFLWGSENSSCVK	K	Y	0.95	0	0	13.9	0	477	0	0	2	1726.85	151	165	IPI00118977,IPI00420775,IPI00662097
Male	demilune cell and parotid protein 3	IPI00469417	18620.3	1	10	13	171	0.000868	0.647	SIVGIQFNYDDK	R	D	0.95	4.42	0.436	5.82	0	1	0	0	2	1398.69	56	67
Male	demilune cell and parotid protein 3	IPI00469417	18620.3	1	10	13	171	0.000868	0.647	SIVGIQFNYDDKDGQVYGSTAGK	R	E	0.95	5.9	0.563	5.74	0	16	15	0	2	2462.18	56	78
Male	demilune cell and parotid protein 3	IPI00469417	18620.3	1	10	13	171	0.000868	0.647	SSYPDDPSFVLK	Y	G	0.95	2.51	0.264	0	0	2	0	0	1	1354.65	127	138
Male	demilune cell and parotid protein 3	IPI00469417	18620.3	1	10	13	171	0.000868	0.647	YDDKDGQVYGSTAGK	N	E	0.95	5.01	0.493	0	0	3	0	0	1	1603.72	64	78
Female	Deoxyribonuclease-1	IPI00308684	32009.9	1	20	28	436	0.00212	0.324	AEAISDHYPVEVTLR	L	K	0.95	5.31	0.46	0	0	27	0	0	1	1699.87	268	282
Female	Deoxyribonuclease-1	IPI00308684	32009.9	1	20	28	436	0.00212	0.324	AISDHYPVEVTLR	E	K	0.95	3.87	0.379	0	0	2	0	0	1	1499.79	270	282
Female	Deoxyribonuclease-1	IPI00308684	32009.9	1	20	28	436	0.00212	0.324	DSHLVAVGK	R	L	0.95	3.26	0.166	0	19	5	0	0	2	925.511	64	72
Female	Deoxyribonuclease-1	IPI00308684	32009.9	1	20	28	436	0.00212	0.324	DVYLDVWQK	Y	W	0.95	3.21	0.215	0	0	2	0	0	1	1165.59	171	179
Female	Deoxyribonuclease-1	IPI00308684	32009.9	1	20	28	436	0.00212	0.324	EAISDHYPVEVTLR	A	K	0.95	3.65	0.319	0	0	5	0	0	1	1628.83	269	282
Female	Deoxyribonuclease-1	IPI00308684	32009.9	1	20	28	436	0.00212	0.324	FDFQAEYGLSNQLAEAISDHYPVEVTLR	P	K	0.95	4.28	0.266	0	0	0	19	0	1	3212.55	255	282
Female	Deoxyribonuclease-1	IPI00308684	32009.9	1	20	28	436	0.00212	0.324	GLSNQLAEAISDHYPVEVTLR	Y	K	0.95	5.94	0.522	0	0	101	58	0	1	2312.19	262	282
Female	Deoxyribonuclease-1	IPI00308684	32009.9	1	20	28	436	0.00212	0.324	LAEAISDHYPVEVTLR	Q	K	0.95	4.81	0.445	0	0	29	3	0	1	1812.95	267	282
Female	Deoxyribonuclease-1	IPI00308684	32009.9	1	20	28	436	0.00212	0.324	NQLAEAISDHYPVEVTLR	S	K	0.95	6.38	0.469	0	0	6	0	0	1	2055.05	265	282
Female	Deoxyribonuclease-1	IPI00308684	32009.9	1	20	28	436	0.00212	0.324	QLAEAISDHYPVEVTLR	N	K	0.95	4.35	0.471	0	0	11	0	0	1	1941.01	266	282
Female	Deoxyribonuclease-1	IPI00308684	32009.9	1	20	28	436	0.00212	0.324	RYVVSEPLGR	Y	K	0.95	3.54	0.19	0	0	8	0	0	1	1175.65	86	95
Female	Deoxyribonuclease-1	IPI00308684	32009.9	1	20	28	436	0.00212	0.324	SNQLAEAISDHYPVEVTLR	L	K	0.95	6.95	0.537	0	0	26	13	0	1	2142.08	264	282
Female	Deoxyribonuclease-1	IPI00308684	32009.9	1	20	28	436	0.00212	0.324	STHCAYDR	T	I	0.95	2.75	0.2	0	0	1	0	0	1	1009.42	228	235
Female	Deoxyribonuclease-1	IPI00308684	32009.9	1	20	28	436	0.00212	0.324	TSPIFQWLIPDSADTTVT	R	S	0.95	3.45	0.432	0	0	3	0	0	1	1992	210	227
Female	Deoxyribonuclease-1	IPI00308684	32009.9	1	20	28	436	0.00212	0.324	TSPIFQWLIPDSADTTVTST	R	H	0.95	3.38	0.312	0	0	3	0	0	1	2180.08	210	229
Female	Deoxyribonuclease-1	IPI00308684	32009.9	1	20	28	436	0.00212	0.324	TSPIFQWLIPDSADTTVTSTHC	R	A	0.95	4.66	0.455	0	0	3	0	0	1	2477.17	210	231
Female	Deoxyribonuclease-1	IPI00308684	32009.9	1	20	28	436	0.00212	0.324	TSPIFQWLIPDSADTTVTSTHCAY	R	D	0.95	5.39	0.448	0	0	10	1	0	1	2711.27	210	233
Female	Deoxyribonuclease-1	IPI00308684	32009.9	1	20	28	436	0.00212	0.324	TSPIFQWLIPDSADTTVTSTHCAYDR	R	I	0.95	0	0	11.8	0	3	24	0	2	2982.39	210	235
Female	Deoxyribonuclease-1	IPI00308684	32009.9	1	20	28	436	0.00212	0.324	YDIAVIQEVR	R	D	0.95	0	0	6.44	3	31	0	0	2	1205.65	54	63
Female	Deoxyribonuclease-1	IPI00308684	32009.9	1	20	28	436	0.00212	0.324	YVVSEPLGR	R	K	0.95	2.91	0.311	2.8	13	7	0	0	2	1019.55	87	95
Female	Deoxyribonuclease-1	IPI00308684	32009.9	1	14	20	228	0.00111	0.324	AEAISDHYPVEVTLR	L	K	0.95	4.3	0.365	0	0	9	0	0	1	1699.87	268	282
Female	Deoxyribonuclease-1	IPI00308684	32009.9	1	14	20	228	0.00111	0.324	DSHLVAVGK	R	L	0.95	3.04	0.186	0	7	9	0	0	2	925.511	64	72
Female	Deoxyribonuclease-1	IPI00308684	32009.9	1	14	20	228	0.00111	0.324	DVYLDVWQK	Y	W	0.95	3.08	0.262	0	0	2	0	0	1	1165.59	171	179
Female	Deoxyribonuclease-1	IPI00308684	32009.9	1	14	20	228	0.00111	0.324	FDFQAEYGLSNQLAEAISDHYPVEVTLR	P	K	0.95	3.93	0.27	0	0	0	5	0	1	3212.55	255	282
Female	Deoxyribonuclease-1	IPI00308684	32009.9	1	14	20	228	0.00111	0.324	GLSNQLAEAISDHYPVEVTLR	Y	K	0.95	4.75	0.489	0	0	53	31	0	1	2312.19	262	282
Female	Deoxyribonuclease-1	IPI00308684	32009.9	1	14	20	228	0.00111	0.324	LAEAISDHYPVEVTLR	Q	K	0.95	5.48	0.424	0	0	11	1	0	1	1812.95	267	282
Female	Deoxyribonuclease-1	IPI00308684	32009.9	1	14	20	228	0.00111	0.324	RYVVSEPLGR	Y	K	0.95	3.58	0.22	0	0	15	0	0	1	1175.65	86	95
Female	Deoxyribonuclease-1	IPI00308684	32009.9	1	14	20	228	0.00111	0.324	SNQLAEAISDHYPVEVTLR	L	K	0.95	6.24	0.493	0	0	9	0	0	1	2142.08	264	282
Female	Deoxyribonuclease-1	IPI00308684	32009.9	1	14	20	228	0.00111	0.324	TSPIFQWLIPDSADTTVT	R	S	0.95	3.13	0.536	0	0	1	0	0	1	1992	210	227
Female	Deoxyribonuclease-1	IPI00308684	32009.9	1	14	20	228	0.00111	0.324	TSPIFQWLIPDSADTTVTSTH	R	C	0.95	5.42	0.441	0	0	6	5	0	1	2317.14	210	230
Female	Deoxyribonuclease-1	IPI00308684	32009.9	1	14	20	228	0.00111	0.324	TSPIFQWLIPDSADTTVTSTHCAY	R	D	0.95	5.08	0.502	0	0	5	0	0	1	2711.27	210	233
Female	Deoxyribonuclease-1	IPI00308684	32009.9	1	14	20	228	0.00111	0.324	TSPIFQWLIPDSADTTVTSTHCAYDR	R	I	0.95	4.12	0.438	1.74	0	0	18	0	2	2982.39	210	235
Female	Deoxyribonuclease-1	IPI00308684	32009.9	1	14	20	228	0.00111	0.324	YDIAVIQEVR	R	D	0.95	0	0	7.72	3	17	0	0	2	1205.65	54	63
Female	Deoxyribonuclease-1	IPI00308684	32009.9	1	14	20	228	0.00111	0.324	YVVSEPLGR	R	K	0.95	2.8	0.336	3.41	10	11	0	0	2	1019.55	87	95
Female	Deoxyribonuclease-1	IPI00308684	32009.9	1	17	21	525	0.00324	0.511	AIVPLHAAPTEAVSEIDALYDVYLDVWQK	F	W	0.95	5.53	0.504	0	0	0	26	0	1	3226.67	151	179
Female	Deoxyribonuclease-1	IPI00308684	32009.9	1	17	21	525	0.00324	0.511	DFQAEYGLSNQLAEAISDHYPVEVTLR	F	K	0.95	5.11	0.413	0	0	0	2	0	1	3065.49	256	282
Female	Deoxyribonuclease-1	IPI00308684	32009.9	1	17	21	525	0.00324	0.511	DSHLVAVGK	R	L	0.95	3.28	0.162	0	64	5	0	0	2	925.511	64	72
Female	Deoxyribonuclease-1	IPI00308684	32009.9	1	17	21	525	0.00324	0.511	EQYLFVYRPDQVSILDSY	K	Q	0.95	5.89	0.502	0	0	1	0	0	1	2235.1	100	117
Female	Deoxyribonuclease-1	IPI00308684	32009.9	1	17	21	525	0.00324	0.511	FFSPYTEVQEFAIVPL	K	H	0.95	4.06	0.415	0	0	4	0	0	1	1886.96	140	155
Female	Deoxyribonuclease-1	IPI00308684	32009.9	1	17	21	525	0.00324	0.511	HAAPTEAVSEIDALYDVYLDVWQK	L	W	0.95	7.23	0.548	0	0	22	249	0	1	2733.34	156	179
Female	Deoxyribonuclease-1	IPI00308684	32009.9	1	17	21	525	0.00324	0.511	ILSRYDIAVIQEVR	K	D	0.95	3.67	0.256	6.52	0	1	0	0	2	1674.95	50	63
Female	Deoxyribonuclease-1	IPI00308684	32009.9	1	17	21	525	0.00324	0.511	IPDSADTTVTSTHCAYDR	L	I	0.95	5.74	0.481	0	0	1	0	0	1	2009.89	218	235
Female	Deoxyribonuclease-1	IPI00308684	32009.9	1	17	21	525	0.00324	0.511	LAEAISDHYPVEVTLR	Q	K	0.95	4.69	0.404	0	0	1	0	0	1	1812.95	267	282
Female	Deoxyribonuclease-1	IPI00308684	32009.9	1	17	21	525	0.00324	0.511	LIPDSADTTVTSTHCAYDR	W	I	0.95	4.6	0.508	0	0	1	0	0	1	2122.97	217	235
Female	Deoxyribonuclease-1	IPI00308684	32009.9	1	17	21	525	0.00324	0.511	PDSADTTVTSTHCAYDR	I	I	0.95	5.71	0.48	0	0	4	0	0	1	1896.8	219	235
Female	Deoxyribonuclease-1	IPI00308684	32009.9	1	17	21	525	0.00324	0.511	PFDFQAEYGLSNQLAEAISDHYPVEVTLR	V	K	0.95	7.06	0.582	0	0	0	25	0	1	3309.61	254	282
Female	Deoxyribonuclease-1	IPI00308684	32009.9	1	17	21	525	0.00324	0.511	QLAEAISDHYPVEVTLR	N	K	0.95	3.21	0.329	0	0	1	0	0	1	1941.01	266	282
Female	Deoxyribonuclease-1	IPI00308684	32009.9	1	17	21	525	0.00324	0.511	TSPIFQWLIPDSADTTVTSTHCAYDR	R	I	0.95	0	0	12	0	11	91	0	2	2982.39	210	235
Female	Deoxyribonuclease-1	IPI00308684	32009.9	1	17	21	525	0.00324	0.511	WLIPDSADTTVTSTHCAYDR	Q	I	0.95	4.9	0.498	0	0	1	0	0	1	2309.05	216	235
Female	Deoxyribonuclease-1	IPI00308684	32009.9	1	17	21	525	0.00324	0.511	YDIAVIQEVR	R	D	0.95	4.37	0.141	4.72	9	4	0	0	2	1205.65	54	63
Female	Deoxyribonuclease-1	IPI00308684	32009.9	1	17	21	525	0.00324	0.511	YVVSEPLGR	R	K	0.95	2.76	0.199	2.59	2	0	0	0	2	1019.55	87	95
Male	Deoxyribonuclease-1	IPI00308684	32009.9	1	18	25	200	0.000955	0.352	AEAISDHYPVEVTLR	L	K	0.95	4.93	0.418	0	0	3	0	0	1	1699.87	268	282
Male	Deoxyribonuclease-1	IPI00308684	32009.9	1	18	25	200	0.000955	0.352	AISDHYPVEVTLR	E	K	0.95	2.95	0.333	0	0	1	0	0	1	1499.79	270	282
Male	Deoxyribonuclease-1	IPI00308684	32009.9	1	18	25	200	0.000955	0.352	DSHLVAVGK	R	L	0.95	3.12	0.173	0	15	4	0	0	2	925.511	64	72
Male	Deoxyribonuclease-1	IPI00308684	32009.9	1	18	25	200	0.000955	0.352	DVYLDVWQK	Y	W	0.95	2.86	0.293	0	0	2	0	0	1	1165.59	171	179
Male	Deoxyribonuclease-1	IPI00308684	32009.9	1	18	25	200	0.000955	0.352	FDFQAEYGLSNQLAEAISDHYPVEVTLR	P	K	0.95	4.34	0.241	0	0	0	4	0	1	3212.55	255	282
Male	Deoxyribonuclease-1	IPI00308684	32009.9	1	18	25	200	0.000955	0.352	GLSNQLAEAISDHYPVEVTLR	Y	K	0.95	5.05	0.487	0	0	43	31	0	1	2312.19	262	282
Male	Deoxyribonuclease-1	IPI00308684	32009.9	1	18	25	200	0.000955	0.352	LAEAISDHYPVEVTLR	Q	K	0.95	5.58	0.393	0	0	4	2	0	1	1812.95	267	282
Male	Deoxyribonuclease-1	IPI00308684	32009.9	1	18	25	200	0.000955	0.352	QLAEAISDHYPVEVTLR	N	K	0.95	3.65	0.464	0	0	1	0	0	1	1941.01	266	282
Male	Deoxyribonuclease-1	IPI00308684	32009.9	1	18	25	200	0.000955	0.352	RYVVSEPLGR	Y	K	0.95	3.58	0.16	0	0	4	0	0	1	1175.65	86	95
Male	Deoxyribonuclease-1	IPI00308684	32009.9	1	18	25	200	0.000955	0.352	SNQLAEAISDHYPVEVTLR	L	K	0.95	6.84	0.531	0	0	5	1	0	1	2142.08	264	282
Male	Deoxyribonuclease-1	IPI00308684	32009.9	1	18	25	200	0.000955	0.352	SYKEQYLF	K	V	0.95	2.82	0.277	0	0	1	0	0	1	1077.53	97	104
Male	Deoxyribonuclease-1	IPI00308684	32009.9	1	18	25	200	0.000955	0.352	TSPIFQWLIPDSADTTVT	R	S	0.95	2.91	0.398	0	0	1	0	0	1	1992	210	227
Male	Deoxyribonuclease-1	IPI00308684	32009.9	1	18	25	200	0.000955	0.352	TSPIFQWLIPDSADTTVTSTH	R	C	0.95	4.22	0.409	0	0	0	2	0	1	2317.14	210	230
Male	Deoxyribonuclease-1	IPI00308684	32009.9	1	18	25	200	0.000955	0.352	TSPIFQWLIPDSADTTVTSTHCAY	R	D	0.95	4.95	0.437	0	0	2	0	0	1	2711.27	210	233
Male	Deoxyribonuclease-1	IPI00308684	32009.9	1	18	25	200	0.000955	0.352	TSPIFQWLIPDSADTTVTSTHCAYDR	R	I	0.95	0	0	6.82	0	1	9	0	2	2982.39	210	235
Male	Deoxyribonuclease-1	IPI00308684	32009.9	1	18	25	200	0.000955	0.352	TTVTSTHCAYDR	D	I	0.95	3.64	0.375	0	0	1	0	0	1	1411.63	224	235
Male	Deoxyribonuclease-1	IPI00308684	32009.9	1	18	25	200	0.000955	0.352	YDIAVIQEVR	R	D	0.95	4.5	0.14	4.2	3	26	0	0	2	1205.65	54	63
Male	Deoxyribonuclease-1	IPI00308684	32009.9	1	18	25	200	0.000955	0.352	YVVSEPLGR	R	K	0.95	2.99	0.332	3.28	6	28	0	0	2	1019.55	87	95
Male	Deoxyribonuclease-1	IPI00308684	32009.9	1	19	29	474	0.00222	0.324	AEAISDHYPVEVTLR	L	K	0.95	4.91	0.447	0	0	10	1	0	1	1699.87	268	282
Male	Deoxyribonuclease-1	IPI00308684	32009.9	1	19	29	474	0.00222	0.324	AISDHYPVEVTLR	E	K	0.95	3.88	0.366	0	0	3	0	0	1	1499.79	270	282
Male	Deoxyribonuclease-1	IPI00308684	32009.9	1	19	29	474	0.00222	0.324	DSHLVAVGK	R	L	0.95	3.03	0.163	0	16	7	0	0	2	925.511	64	72
Male	Deoxyribonuclease-1	IPI00308684	32009.9	1	19	29	474	0.00222	0.324	DVYLDVWQK	Y	W	0.95	3.24	0.274	0	2	7	0	0	1	1165.59	171	179
Male	Deoxyribonuclease-1	IPI00308684	32009.9	1	19	29	474	0.00222	0.324	FDFQAEYGLSNQLAEAISDHYPVEVTLR	P	K	0.95	4.27	0.301	0	0	0	9	0	1	3212.55	255	282
Male	Deoxyribonuclease-1	IPI00308684	32009.9	1	19	29	474	0.00222	0.324	GLSNQLAEAISDHYPVEVTLR	Y	K	0.95	5.91	0.509	0	0	54	34	0	1	2312.19	262	282
Male	Deoxyribonuclease-1	IPI00308684	32009.9	1	19	29	474	0.00222	0.324	LAEAISDHYPVEVTLR	Q	K	0.95	5.7	0.423	0	0	10	1	0	1	1812.95	267	282
Male	Deoxyribonuclease-1	IPI00308684	32009.9	1	19	29	474	0.00222	0.324	PDSADTTVTSTHCAYDR	I	I	0.95	5.47	0.485	0	0	3	0	0	1	1896.8	219	235
Male	Deoxyribonuclease-1	IPI00308684	32009.9	1	19	29	474	0.00222	0.324	QLAEAISDHYPVEVTLR	N	K	0.95	3.99	0.327	0	0	1	0	0	1	1941.01	266	282
Male	Deoxyribonuclease-1	IPI00308684	32009.9	1	19	29	474	0.00222	0.324	RYVVSEPLGR	Y	K	0.95	3.5	0.216	0	0	6	0	0	1	1175.65	86	95
Male	Deoxyribonuclease-1	IPI00308684	32009.9	1	19	29	474	0.00222	0.324	SNQLAEAISDHYPVEVTLR	L	K	0.95	6.63	0.538	0	0	10	0	0	1	2142.08	264	282
Male	Deoxyribonuclease-1	IPI00308684	32009.9	1	19	29	474	0.00222	0.324	STHCAYDR	T	I	0.95	2.51	0.263	0	0	1	0	0	1	1009.42	228	235
Male	Deoxyribonuclease-1	IPI00308684	32009.9	1	19	29	474	0.00222	0.324	TSPIFQWLIPDSADTTVT	R	S	0.95	3.25	0.463	0	0	2	0	0	1	1992	210	227
Male	Deoxyribonuclease-1	IPI00308684	32009.9	1	19	29	474	0.00222	0.324	TSPIFQWLIPDSADTTVTSTH	R	C	0.95	5.21	0.475	0	0	2	0	0	1	2317.14	210	230
Male	Deoxyribonuclease-1	IPI00308684	32009.9	1	19	29	474	0.00222	0.324	TSPIFQWLIPDSADTTVTSTHC	R	A	0.95	3.76	0.53	0	0	1	1	0	1	2477.17	210	231
Male	Deoxyribonuclease-1	IPI00308684	32009.9	1	19	29	474	0.00222	0.324	TSPIFQWLIPDSADTTVTSTHCAY	R	D	0.95	4.91	0.482	0	0	5	1	0	1	2711.27	210	233
Male	Deoxyribonuclease-1	IPI00308684	32009.9	1	19	29	474	0.00222	0.324	TSPIFQWLIPDSADTTVTSTHCAYDR	R	I	0.95	4.17	0.383	4.59	0	5	28	0	2	2982.39	210	235
Male	Deoxyribonuclease-1	IPI00308684	32009.9	1	19	29	474	0.00222	0.324	YDIAVIQEVR	R	D	0.95	0	0	6.89	31	189	0	0	2	1205.65	54	63
Male	Deoxyribonuclease-1	IPI00308684	32009.9	1	19	29	474	0.00222	0.324	YVVSEPLGR	R	K	0.95	2.86	0.322	3.48	10	24	0	0	2	1019.55	87	95
Male	Deoxyribonuclease-1	IPI00308684	32009.9	1	18	23	364	0.00185	0.493	AEAISDHYPVEVTLR	L	K	0.95	3.93	0.154	0	0	1	0	0	1	1699.87	268	282
Male	Deoxyribonuclease-1	IPI00308684	32009.9	1	18	23	364	0.00185	0.493	AIVPLHAAPTEAVSEIDALYDVYLDVWQK	F	W	0.95	4.62	0.483	0	0	0	17	0	1	3226.67	151	179
Male	Deoxyribonuclease-1	IPI00308684	32009.9	1	18	23	364	0.00185	0.493	DFQAEYGLSNQLAEAISDHYPVEVTLR	F	K	0.95	6.02	0.518	0	0	0	5	0	1	3065.49	256	282
Male	Deoxyribonuclease-1	IPI00308684	32009.9	1	18	23	364	0.00185	0.493	DSHLVAVGK	R	L	0.95	3.12	0.164	0	20	1	0	0	2	925.511	64	72
Male	Deoxyribonuclease-1	IPI00308684	32009.9	1	18	23	364	0.00185	0.493	DVYLDVWQK	Y	W	0.95	3.1	0.263	0	0	3	0	0	1	1165.59	171	179
Male	Deoxyribonuclease-1	IPI00308684	32009.9	1	18	23	364	0.00185	0.493	EQYLFVYRPDQVSILDSY	K	Q	0.95	6.23	0.55	0	0	71	0	0	1	2235.1	100	117
Male	Deoxyribonuclease-1	IPI00308684	32009.9	1	18	23	364	0.00185	0.493	FFSPYTEVQEF	K	A	0.95	3.09	0.258	0	0	1	0	0	1	1393.63	140	150
Male	Deoxyribonuclease-1	IPI00308684	32009.9	1	18	23	364	0.00185	0.493	FFSPYTEVQEFAIVPL	K	H	0.95	3.29	0.297	0	0	1	0	0	1	1886.96	140	155
Male	Deoxyribonuclease-1	IPI00308684	32009.9	1	18	23	364	0.00185	0.493	FFSPYTEVQEFAIVPLHAAPTEAVSEIDALY	K	D	0.95	5.16	0.525	0	0	0	34	0	1	3454.71	140	170
Male	Deoxyribonuclease-1	IPI00308684	32009.9	1	18	23	364	0.00185	0.493	GLSNQLAEAISDHYPVEVTLR	Y	K	0.95	5.76	0.491	0	0	27	15	0	1	2312.19	262	282
Male	Deoxyribonuclease-1	IPI00308684	32009.9	1	18	23	364	0.00185	0.493	HAAPTEAVSEIDALYDVYLDVWQK	L	W	0.95	7.18	0.52	0	0	2	13	0	1	2733.34	156	179
Male	Deoxyribonuclease-1	IPI00308684	32009.9	1	18	23	364	0.00185	0.493	IPDSADTTVTSTHCAYDR	L	I	0.95	5.87	0.487	0	0	1	0	0	1	2009.89	218	235
Male	Deoxyribonuclease-1	IPI00308684	32009.9	1	18	23	364	0.00185	0.493	LAEAISDHYPVEVTLR	Q	K	0.95	4.19	0.448	0	0	5	0	0	1	1812.95	267	282
Male	Deoxyribonuclease-1	IPI00308684	32009.9	1	18	23	364	0.00185	0.493	PDSADTTVTSTHCAYDR	I	I	0.95	5.49	0.44	0	0	1	0	0	1	1896.8	219	235
Male	Deoxyribonuclease-1	IPI00308684	32009.9	1	18	23	364	0.00185	0.493	RYVVSEPLGR	Y	K	0.95	3.46	0.215	0	0	21	0	0	1	1175.65	86	95
Male	Deoxyribonuclease-1	IPI00308684	32009.9	1	18	23	364	0.00185	0.493	TSPIFQWLIPDSADTTVTSTHCAYDR	R	I	0.95	0	0	9.59	0	23	60	0	2	2982.39	210	235
Male	Deoxyribonuclease-1	IPI00308684	32009.9	1	18	23	364	0.00185	0.493	YDIAVIQEVR	R	D	0.95	4.45	0.139	3.77	19	17	0	0	2	1205.65	54	63
Male	Deoxyribonuclease-1	IPI00308684	32009.9	1	18	23	364	0.00185	0.493	YVVSEPLGR	R	K	0.95	0	0	3.44	6	0	0	0	2	1019.55	87	95
Male	E3 SUMO-protein ligase RanBP2	IPI00337844	341073	0.998	2	2	3	1.4e-05	0.00688	LESLQCLDSDKSTWR	Y	A	0.95	3.33	0.201	0	0	2	0	0	1	1837.88	215	229
Male	E3 SUMO-protein ligase RanBP2	IPI00337844	341073	0.998	2	2	3	1.4e-05	0.00688	RDQVFK	R	V	0.95	0	0	3.27	1	0	0	0	2	792.437	2804	2809
Female	Epidermal growth factor-binding protein type B	IPI00121818	28672	0.998	2	2	6	3.71e-05	0.119	LFQEEPSAQHR	K	L	0.95	3.88	0.241	4.68	0	5	0	0	2	1341.66	80	90	IPI00121821,IPI00130801
Female	Epidermal growth factor-binding protein type B	IPI00121818	28672	0.998	2	2	6	3.71e-05	0.119	NWVLTAAHCYVDQYEVWLGK	R	N	0.95	4.21	0.41	4.92	0	1	0	0	2	2452.18	58	77	IPI00121821,IPI00130801
Male	Epidermal growth factor-binding protein type B	IPI00121818	28672	1	7	8	29	0.000139	0.326	EHICGGVLLDR	K	N	0.95	3.21	0.417	7.43	2	17	0	0	2	1268.64	47	57	IPI00121821,IPI00113575
Male	Epidermal growth factor-binding protein type B	IPI00121818	28672	1	7	8	29	0.000139	0.326	FQEEPSAQHR	L	L	0.95	2.76	0.187	0	0	1	0	0	1	1228.57	81	90
Male	Epidermal growth factor-binding protein type B	IPI00121818	28672	1	7	8	29	0.000139	0.326	ITLLPNENCAK	F	V	0.95	3.23	0.169	0	0	4	0	0	1	1272.66	176	186
Male	Epidermal growth factor-binding protein type B	IPI00121818	28672	1	7	8	29	0.000139	0.326	KPIALPTK	V	E	0.95	2.77	0.203	0	0	1	0	0	1	867.567	137	144
Male	Epidermal growth factor-binding protein type B	IPI00121818	28672	1	7	8	29	0.000139	0.326	LFQEEPSAQHR	K	L	0.95	3.84	0.299	3.72	6	12	0	0	2	1341.66	80	90	IPI00121821,IPI00130801
Male	Epidermal growth factor-binding protein type B	IPI00121818	28672	1	7	8	29	0.000139	0.326	LSKPADITDVVKPIALPTK	R	E	0.95	5.76	0.425	11.8	0	5	2	0	2	2006.19	126	144	IPI00121821,IPI00134580
Male	Epidermal growth factor-binding protein type B	IPI00121818	28672	1	7	8	29	0.000139	0.326	NWVLTAAHCYVDQYEVWLGK	R	N	0.95	3.27	0.309	0	0	2	0	0	2	2452.18	58	77	IPI00121821,IPI00130801
Male	Epidermal growth factor-binding protein type B	IPI00121818	28672	1	7	8	29	0.000139	0.326	PADITDVVKPIALPTK	K	E	0.95	5.43	0.407	0	0	2	0	0	1	1677.98	129	144	IPI00134580
Male	Epidermal growth factor-binding protein type B	IPI00121818	28672	1	7	8	29	0.000139	0.326	QKEHICGGVLLDR	Y	N	0.95	2.66	0.33	0	0	2	0	0	1	1524.8	45	57
Male	Epidermal growth factor-binding protein type B	IPI00121818	28672	1	7	8	29	0.000139	0.326	WQKPDDLQCVFIT	R	L	0.95	3.76	0.274	0	0	0	1	0	1	1649.8	165	177
Male	Epidermal growth factor-binding protein type B	IPI00121818	28672	1	7	9	36	0.000168	0.372	ASGWGSITPTR	L	W	0.95	3.43	0.326	0	1	3	0	0	1	1132.58	154	164
Male	Epidermal growth factor-binding protein type B	IPI00121818	28672	1	7	9	36	0.000168	0.372	EHICGGVLLDR	K	N	0.95	3.19	0.283	7.48	1	14	0	0	2	1268.64	47	57	IPI00121821,IPI00113575
Male	Epidermal growth factor-binding protein type B	IPI00121818	28672	1	7	9	36	0.000168	0.372	ITLLPNENCAK	F	V	0.95	3.1	0.224	0	0	5	0	0	1	1272.66	176	186
Male	Epidermal growth factor-binding protein type B	IPI00121818	28672	1	7	9	36	0.000168	0.372	LFQEEPSAQHR	K	L	0.95	3.71	0.302	4.62	3	13	0	0	2	1341.66	80	90	IPI00121821,IPI00130801
Male	Epidermal growth factor-binding protein type B	IPI00121818	28672	1	7	9	36	0.000168	0.372	LSKPADITDVVKPIALPTK	R	E	0.95	0	0	7.4	0	5	3	0	2	2006.19	126	144	IPI00121821,IPI00134580
Male	Epidermal growth factor-binding protein type B	IPI00121818	28672	1	7	9	36	0.000168	0.372	NWVLTAAHCYVDQYEVWLGK	R	N	0.95	5.35	0.501	5.64	0	1	0	0	2	2452.18	58	77	IPI00121821,IPI00130801
Male	Epidermal growth factor-binding protein type B	IPI00121818	28672	1	7	9	36	0.000168	0.372	PADITDVVKPIALPTK	K	E	0.95	5.73	0.436	0	0	3	0	0	1	1677.98	129	144	IPI00134580
Male	Epidermal growth factor-binding protein type B	IPI00121818	28672	1	7	9	36	0.000168	0.372	WQKPDDLQCVF	R	I	0.95	3.43	0.295	0	0	5	0	0	1	1435.67	165	175
Male	Epidermal growth factor-binding protein type B	IPI00121818	28672	1	7	9	36	0.000168	0.372	WQKPDDLQCVFI	R	T	0.95	3.62	0.297	0	0	3	0	0	1	1548.75	165	176	IPI00130801
Male	Epidermal growth factor-binding protein type B	IPI00121818	28672	1	7	9	36	0.000168	0.372	YQKEHICGGVLLDR	Y	N	0.95	3.46	0.223	0	0	2	0	0	1	1687.86	44	57
Male	Epidermal growth factor-binding protein type B	IPI00121818	28672	1	8	10	148	0.000751	0.391	CYVDQYEVWLGK	H	N	0.95	3.58	0.46	0	0	2	0	0	1	1559.72	66	77
Male	Epidermal growth factor-binding protein type B	IPI00121818	28672	1	8	10	148	0.000751	0.391	EHICGGVLLDR	K	N	0.95	3.29	0.32	7.89	12	35	0	0	2	1268.64	47	57	IPI00121821,IPI00113575
Male	Epidermal growth factor-binding protein type B	IPI00121818	28672	1	8	10	148	0.000751	0.391	FQEEPSAQHR	L	L	0.95	3.37	0.203	0	0	3	0	0	1	1228.57	81	90
Male	Epidermal growth factor-binding protein type B	IPI00121818	28672	1	8	10	148	0.000751	0.391	IPPGADFSNDLMLLR	T	L	0.95	4.6	0.508	9.01	0	1	0	0	1	1658.86	111	125	IPI00113575
Male	Epidermal growth factor-binding protein type B	IPI00121818	28672	1	8	10	148	0.000751	0.391	LFQEEPSAQHR	K	L	0.95	3.76	0.288	5.92	9	38	0	0	2	1341.66	80	90	IPI00121821,IPI00130801
Male	Epidermal growth factor-binding protein type B	IPI00121818	28672	1	8	10	148	0.000751	0.391	LSKPADITDVVKPIALPTK	R	E	0.95	5.58	0.426	11.7	0	12	3	0	2	2006.19	126	144	IPI00121821,IPI00134580
Male	Epidermal growth factor-binding protein type B	IPI00121818	28672	1	8	10	148	0.000751	0.391	NSQPWQVAVYYQK	K	E	0.95	4.59	0.471	10.4	0	18	0	0	2	1610.8	34	46	IPI00121821
Male	Epidermal growth factor-binding protein type B	IPI00121818	28672	1	8	10	148	0.000751	0.391	NSQPWQVAVYYQKEHICGGVLLDR	K	N	0.95	4.25	0.374	2	0	3	0	0	2	2860.42	34	57	IPI00121821,IPI00136038
Male	Epidermal growth factor-binding protein type B	IPI00121818	28672	1	8	10	148	0.000751	0.391	NWVLTAAHCYVDQYEVWLGK	R	N	0.95	0	0	9.14	0	36	34	0	2	2452.18	58	77	IPI00121821,IPI00130801
Male	Epidermal growth factor-binding protein type B	IPI00121818	28672	1	8	10	148	0.000751	0.391	PADITDVVKPIALPTK	K	E	0.95	4.06	0.31	0	0	2	0	0	1	1677.98	129	144	IPI00134580
Male	Epidermal growth factor-binding protein type B	IPI00121818	28672	1	8	10	148	0.000751	0.391	WQKPDDLQCVFIT	R	L	0.95	3.55	0.228	0	0	0	3	0	1	1649.8	165	177
Male	Epidermal growth factor-binding protein type B	IPI00121818	28672	1	8	10	148	0.000751	0.391	YQKEHICGGVLLDR	Y	N	0.95	3.85	0.194	0	0	2	0	0	1	1687.86	44	57
Female	Extracellular peptidase inhibitor	IPI00126104	7769	0.998	2	2	6	2.92e-05	0.162	EKPGACPKPPPR	K	S	0.95	2.97	0.361	3.49	0	4	0	0	2	1333.71	28	39
Female	Extracellular peptidase inhibitor	IPI00126104	7769	0.998	2	2	6	2.92e-05	0.162	PGACPKPPPR	K	S	0.95	3.55	0.314	0	0	2	0	0	1	1076.57	30	39
Male	Extracellular peptidase inhibitor	IPI00126104	7769	0.998	2	2	5	2.39e-05	0.162	EKPGACPKPPPR	K	S	0.95	2.78	0.333	2.82	0	2	0	0	2	1333.71	28	39
Male	Extracellular peptidase inhibitor	IPI00126104	7769	0.998	2	2	5	2.39e-05	0.162	PGACPKPPPR	K	S	0.95	3.44	0.284	0	0	3	0	0	1	1076.57	30	39
Male	Extracellular peptidase inhibitor	IPI00126104	7769	0.999	2	2	6	2.81e-05	0.162	EKPGACPKPPPR	K	S	0.95	2.52	0.307	1.89	0	3	0	0	2	1333.71	28	39
Male	Extracellular peptidase inhibitor	IPI00126104	7769	0.999	2	2	6	2.81e-05	0.162	PGACPKPPPR	K	S	0.95	3.87	0.325	0	0	3	0	0	1	1076.57	30	39
Male	Extracellular peptidase inhibitor	IPI00126104	7769	0.998	2	2	21	0.000107	0.162	EKPGACPKPPPR	K	S	0.95	2.43	0.362	3.28	0	15	0	0	2	1333.71	28	39
Male	Extracellular peptidase inhibitor	IPI00126104	7769	0.998	2	2	21	0.000107	0.162	PGACPKPPPR	K	S	0.95	2.93	0.244	0	0	6	0	0	1	1076.57	30	39
Female	gamma-glutamyl hydrolase precursor	IPI00828662	35453	0.998	2	2	4	1.95e-05	0.192	ALESFDNGDHFPVWGT	K	C	0.95	3.67	0.15	0	0	1	0	0	1	1791.8	117	132
Female	gamma-glutamyl hydrolase precursor	IPI00828662	35453	0.998	2	2	4	1.95e-05	0.192	ALESFDNGDHFPVWGTCLG	K	F	0.95	3.27	0.248	0	0	3	0	0	1	2064.91	117	135
Female	gamma-glutamyl hydrolase precursor	IPI00828662	35453	0.998	2	2	4	1.95e-05	0.192	KNSHHFENVVK	R	E	0.95	4.51	0.303	5.92	0	12	0	0	2	1338.69	280	290	IPI00129243
Female	gamma-glutamyl hydrolase precursor	IPI00828662	35453	0.998	2	2	4	1.95e-05	0.192	NLGGISHAPNAVK	K	T	0.95	4.64	0.411	8.48	0	16	0	0	2	1277.7	253	265	IPI00129243
Female	gamma-glutamyl hydrolase precursor	IPI00828662	35453	0.998	2	2	4	1.95e-05	0.192	NSHHFENVVK	K	E	0.95	2.95	0.262	2.92	3	14	0	0	2	1210.6	281	290	IPI00129243
Female	gamma-glutamyl hydrolase precursor	IPI00828662	35453	0.998	2	2	4	1.95e-05	0.192	VVPIRPDLSDAEYEELFR	R	S	0.95	4.88	0.434	8.07	0	25	15	0	2	2148.1	70	87	IPI00129243
Male	granulin	IPI00124640	64996.8	1	4	5	10	5.08e-05	0.0814	AVCCEDHIHCCPAGFQCHTEK	K	G	0.95	0	0	5.8	0	0	3	0	2	2616.03	323	343
Male	granulin	IPI00124640	64996.8	1	4	5	10	5.08e-05	0.0814	HCCPGGFHCSAR	R	G	0.95	0	0	7.22	0	2	0	0	2	1445.56	566	577
Male	granulin	IPI00124640	64996.8	1	4	5	10	5.08e-05	0.0814	IHCCPAGFQCHTEK	H	G	0.95	3.03	0.315	0	0	2	0	0	1	1744.74	330	343
Male	granulin	IPI00124640	64996.8	1	4	5	10	5.08e-05	0.0814	VHCCPHGASCDLVHTR	R	C	0.95	4.69	0.514	9.08	0	2	1	0	2	1905.83	174	189
Female	hypothetical protein LOC381819	IPI00918176	11573	1	5	6	13	6.33e-05	0.35	HLQQSLQER	K	P	0.95	3.14	0.195	0	0	3	0	0	1	1138.6	58	66
Female	hypothetical protein LOC381819	IPI00918176	11573	1	5	6	13	6.33e-05	0.35	HLQQSLQERPHLQVQQENQPLQSK	K	Q	0.95	4.98	0.464	3.96	0	0	2	0	2	2893.5	58	81
Female	hypothetical protein LOC381819	IPI00918176	11573	1	5	6	13	6.33e-05	0.35	PHLQVQQENQPLQSK	R	Q	0.95	5.14	0.304	0	0	1	0	0	1	1773.92	67	81
Female	hypothetical protein LOC381819	IPI00918176	11573	1	5	6	13	6.33e-05	0.35	RDFVVSSHNNR	R	E	0.95	4.58	0.361	3.74	0	3	3	0	2	1330.66	21	31
Female	hypothetical protein LOC381819	IPI00918176	11573	1	5	6	13	6.33e-05	0.35	RPHLQVQQENQPLQSK	E	Q	0.95	4.7	0.521	0	0	1	0	0	1	1930.03	66	81
Female	hypothetical protein LOC381819	IPI00918176	11573	1	5	7	27	0.000132	0.35	HLQQSLQER	K	P	0.95	3.17	0.194	0	0	2	0	0	1	1138.6	58	66
Female	hypothetical protein LOC381819	IPI00918176	11573	1	5	7	27	0.000132	0.35	HLQQSLQERPH	K	L	0.95	4.06	0.236	0	0	0	1	0	1	1372.71	58	68
Female	hypothetical protein LOC381819	IPI00918176	11573	1	5	7	27	0.000132	0.35	HLQQSLQERPHLQVQQENQPLQSK	K	Q	0.95	4.53	0.573	4.92	0	0	5	0	2	2893.5	58	81
Female	hypothetical protein LOC381819	IPI00918176	11573	1	5	7	27	0.000132	0.35	RDFVVSSHNNR	R	E	0.95	4.52	0.394	4.21	0	7	6	0	2	1330.66	21	31
Female	hypothetical protein LOC381819	IPI00918176	11573	1	5	7	27	0.000132	0.35	RPHLQVQQENQPLQSK	E	Q	0.95	4.63	0.489	0	0	1	5	0	1	1930.03	66	81
Female	hypothetical protein LOC381819	IPI00918176	11573	1	5	5	56	0.000346	0.35	HLQQSLQER	K	P	0.95	3.1	0.256	0	0	4	0	0	1	1138.6	58	66
Female	hypothetical protein LOC381819	IPI00918176	11573	1	5	5	56	0.000346	0.35	HLQQSLQERPHLQVQQENQPLQSK	K	Q	0.95	4.97	0.571	6.74	0	0	29	0	2	2893.5	58	81
Female	hypothetical protein LOC381819	IPI00918176	11573	1	5	5	56	0.000346	0.35	PHLQVQQENQPLQSK	R	Q	0.95	4.78	0.377	0	0	1	0	0	1	1773.92	67	81
Female	hypothetical protein LOC381819	IPI00918176	11573	1	5	5	56	0.000346	0.35	RDFVVSSHNNR	R	E	0.95	4.45	0.392	5.42	0	17	0	0	2	1330.66	21	31
Female	hypothetical protein LOC381819	IPI00918176	11573	1	5	5	56	0.000346	0.35	RPHLQVQQENQPLQSK	E	Q	0.95	2.96	0.415	0	0	5	0	0	1	1930.03	66	81
Male	hypothetical protein LOC381819	IPI00918176	11573	1	4	4	10	4.78e-05	0.35	HLQQSLQER	K	P	0.95	2.71	0.18	0	0	3	0	0	1	1138.6	58	66
Male	hypothetical protein LOC381819	IPI00918176	11573	1	4	4	10	4.78e-05	0.35	HLQQSLQERPHLQVQ	K	Q	0.95	3.82	0.249	0	0	0	2	0	1	1840.98	58	72
Male	hypothetical protein LOC381819	IPI00918176	11573	1	4	4	10	4.78e-05	0.35	HLQQSLQERPHLQVQQENQPLQSK	K	Q	0.95	4.72	0.493	6.68	0	0	2	0	2	2893.5	58	81
Male	hypothetical protein LOC381819	IPI00918176	11573	1	4	4	10	4.78e-05	0.35	RDFVVSSHNNR	R	E	0.95	4.07	0.381	5.82	0	3	0	0	2	1330.66	21	31
Male	hypothetical protein LOC381819	IPI00918176	11573	1	5	5	12	5.61e-05	0.35	HLQQSLQER	K	P	0.95	3.27	0.232	0	0	6	0	0	1	1138.6	58	66
Male	hypothetical protein LOC381819	IPI00918176	11573	1	5	5	12	5.61e-05	0.35	HLQQSLQERPHLQVQ	K	Q	0.95	4.08	0.302	0	0	0	1	0	1	1840.98	58	72
Male	hypothetical protein LOC381819	IPI00918176	11573	1	5	5	12	5.61e-05	0.35	HLQQSLQERPHLQVQQENQPL	K	Q	0.95	5.21	0.415	0	0	1	0	0	1	2550.32	58	78
Male	hypothetical protein LOC381819	IPI00918176	11573	1	5	5	12	5.61e-05	0.35	HLQQSLQERPHLQVQQENQPLQSK	K	Q	0.95	4.87	0.435	6.77	0	0	1	0	2	2893.5	58	81
Male	hypothetical protein LOC381819	IPI00918176	11573	1	5	5	12	5.61e-05	0.35	RDFVVSSHNNR	R	E	0.95	4.47	0.37	3.92	0	3	0	0	2	1330.66	21	31
Male	hypothetical protein LOC381819	IPI00918176	11573	1	4	5	43	0.000218	0.35	HLQQSLQER	K	P	0.95	3.29	0.164	0	0	3	0	0	1	1138.6	58	66
Male	hypothetical protein LOC381819	IPI00918176	11573	1	4	5	43	0.000218	0.35	HLQQSLQERPHLQVQQENQPL	K	Q	0.95	5.19	0.402	0	0	1	0	0	1	2550.32	58	78
Male	hypothetical protein LOC381819	IPI00918176	11573	1	4	5	43	0.000218	0.35	HLQQSLQERPHLQVQQENQPLQSK	K	Q	0.95	0	0	3.92	0	0	9	0	2	2893.5	58	81
Male	hypothetical protein LOC381819	IPI00918176	11573	1	4	5	43	0.000218	0.35	RDFVVSSHNNR	R	E	0.95	4.06	0.435	5.1	0	25	5	0	2	1330.66	21	31
Male	Isoform 1 of Vomeromodulin	IPI00349521	62431.3	1	5	6	12	5.73e-05	0.0998	IKKPLEDAVENVSGIK	K	D	0.95	4.89	0.507	10.7	0	2	3	0	2	1739.99	209	224
Male	Isoform 1 of Vomeromodulin	IPI00349521	62431.3	1	5	6	12	5.73e-05	0.0998	KPLEDAVENVSGIK	K	D	0.95	4.55	0.407	6.55	0	1	0	0	2	1498.81	211	224
Male	Isoform 1 of Vomeromodulin	IPI00349521	62431.3	1	5	6	12	5.73e-05	0.0998	SEHSVVPPEAK	R	E	0.95	3.67	0.328	2.15	0	3	0	0	2	1179.6	528	538
Male	Isoform 1 of Vomeromodulin	IPI00349521	62431.3	1	5	6	12	5.73e-05	0.0998	SEHSVVPPEAKEEVEGILSEVGK	R	V	0.95	4.37	0.448	1.46	0	0	2	0	2	2449.25	528	550
Male	Isoform 1 of Vomeromodulin	IPI00349521	62431.3	1	5	6	12	5.73e-05	0.0998	VPLPVPLPLDQIIPAIVTAK	K	I	0.95	2.93	0.288	0	0	1	0	0	2	2094.29	348	367
Male	Isoform 2 of Myosin-XVIIIa	IPI00407425	195881	0.999	2	2	3	1.4e-05	0.0215	AEINGEVDDDDAGGEWRLK	A	Y	0.95	4.02	0.142	0	0	1	0	0	1	2088.95	1021	1039
Male	Isoform 2 of Myosin-XVIIIa	IPI00407425	195881	0.999	2	2	3	1.4e-05	0.0215	QMEVQLEEEYEDKQKALR	K	E	0.95	0	0	3.52	0	2	0	0	2	2265.07	1275	1292
Female	Isoform 2 of Submandibular gland protein C	IPI00405006	74365.1	1	9	12	28	0.000136	0.201	DDPTVQGHDVAASDGSK	G	Q	0.95	4.38	0.527	0	0	3	0	0	1	1698.76	286	302
Female	Isoform 2 of Submandibular gland protein C	IPI00405006	74365.1	1	9	12	28	0.000136	0.201	ILEQITSAPGGSVSSAVENLK	K	A	0.95	6.51	0.485	10.1	0	3	1	0	2	2100.12	339	359
Female	Isoform 2 of Submandibular gland protein C	IPI00405006	74365.1	1	9	12	28	0.000136	0.201	KFIEPLTEDHGPTSTSASVSG	K	D	0.95	4.96	0.513	0	0	1	0	0	1	2160.05	244	264
Female	Isoform 2 of Submandibular gland protein C	IPI00405006	74365.1	1	9	12	28	0.000136	0.201	KNLSPATGGSATQQSNLDDSHAPNLGK	R	S	0.95	6.06	0.442	8	0	0	1	0	2	2708.32	68	94
Female	Isoform 2 of Submandibular gland protein C	IPI00405006	74365.1	1	9	12	28	0.000136	0.201	LDGHSSDGLSK	R	V	0.95	2.79	0.338	5.74	4	1	0	0	2	1115.53	272	282
Female	Isoform 2 of Submandibular gland protein C	IPI00405006	74365.1	1	9	12	28	0.000136	0.201	NLSPATGGSATQQSNLDDSHAPNLGK	K	S	0.95	1.95	0.225	6	0	0	2	0	2	2580.23	69	94
Female	Isoform 2 of Submandibular gland protein C	IPI00405006	74365.1	1	9	12	28	0.000136	0.201	SDSGSHNLSSGSGSR	K	S	0.95	4.64	0.445	6.38	0	3	0	0	2	1434.62	680	694
Female	Isoform 2 of Submandibular gland protein C	IPI00405006	74365.1	1	9	12	28	0.000136	0.201	SNVSTGGEPSDKNEPADPGVSGR	R	V	0.95	3.93	0.294	3.57	0	2	0	0	2	2257.03	695	717
Female	Isoform 2 of Submandibular gland protein C	IPI00405006	74365.1	1	9	12	28	0.000136	0.201	VGGGAHGNIGLR	R	A	0.95	3.34	0.383	5.92	2	5	0	0	2	1107.6	121	132
Female	Isoform 2 of Submandibular gland protein C	IPI00405006	74365.1	1	6	8	14	6.84e-05	0.15	DDPTVQGHDVAASDGSK	G	Q	0.95	3.95	0.499	0	0	2	0	0	1	1698.76	286	302
Female	Isoform 2 of Submandibular gland protein C	IPI00405006	74365.1	1	6	8	14	6.84e-05	0.15	GIVEPITSAAGGSVSSAVENLK	K	A	0.95	7.09	0.55	18.9	0	2	0	0	2	2086.1	218	239
Female	Isoform 2 of Submandibular gland protein C	IPI00405006	74365.1	1	6	8	14	6.84e-05	0.15	ILEQITSAPGGSVSSAVENLK	K	A	0.95	5.83	0.519	4.09	0	2	1	0	2	2100.12	339	359
Female	Isoform 2 of Submandibular gland protein C	IPI00405006	74365.1	1	6	8	14	6.84e-05	0.15	KNLSPATGGSATQQSNLDDSHAPNLGK	R	S	0.95	4.57	0.428	2.1	0	0	1	0	2	2708.32	68	94
Female	Isoform 2 of Submandibular gland protein C	IPI00405006	74365.1	1	6	8	14	6.84e-05	0.15	LDGHSSDGLSK	R	V	0.95	2.88	0.31	4.01	2	1	0	0	2	1115.53	272	282
Female	Isoform 2 of Submandibular gland protein C	IPI00405006	74365.1	1	6	8	14	6.84e-05	0.15	VGGGAHGNIGLR	R	A	0.95	3.8	0.446	5.92	0	3	0	0	2	1107.6	121	132
Female	Isoform 2 of Submandibular gland protein C	IPI00405006	74365.1	1	10	11	58	0.000358	0.241	GADKPSEHLSNLFLK	K	G	0.95	4.11	0.229	5.12	0	6	0	0	2	1655.88	200	214
Female	Isoform 2 of Submandibular gland protein C	IPI00405006	74365.1	1	10	11	58	0.000358	0.241	GIVEPITSAAGGSVSSAVENLK	K	A	0.95	7.76	0.589	20.7	0	2	0	0	2	2086.1	218	239
Female	Isoform 2 of Submandibular gland protein C	IPI00405006	74365.1	1	10	11	58	0.000358	0.241	KFIEPLTEDHGPTSTSASVSG	K	D	0.95	4.62	0.384	0	0	2	0	0	1	2160.05	244	264
Female	Isoform 2 of Submandibular gland protein C	IPI00405006	74365.1	1	10	11	58	0.000358	0.241	KFIEPLTEDHGPTSTSASVSGDSSTSSR	K	L	0.95	7.02	0.643	4	0	0	17	0	2	2880.35	244	271
Female	Isoform 2 of Submandibular gland protein C	IPI00405006	74365.1	1	10	11	58	0.000358	0.241	KNLSPATGGSATQQSNLDDSHAPNLGK	R	S	0.95	6.33	0.507	7.54	0	0	6	0	2	2708.32	68	94
Female	Isoform 2 of Submandibular gland protein C	IPI00405006	74365.1	1	10	11	58	0.000358	0.241	LDGHSSDGLSK	R	V	0.95	3.16	0.305	6.12	0	7	0	0	2	1115.53	272	282
Female	Isoform 2 of Submandibular gland protein C	IPI00405006	74365.1	1	10	11	58	0.000358	0.241	QNVEDSTLSTGSATSNEGDDK	K	S	0.95	5.42	0.487	10.1	0	3	0	0	2	2154.93	303	323
Female	Isoform 2 of Submandibular gland protein C	IPI00405006	74365.1	1	10	11	58	0.000358	0.241	SDSGSHNLSSGSGSR	K	S	0.95	3.16	0.477	4.68	0	4	0	0	2	1434.62	680	694
Female	Isoform 2 of Submandibular gland protein C	IPI00405006	74365.1	1	10	11	58	0.000358	0.241	SNVSTGGEPSDKNEPADPGVSGR	R	V	0.95	3.7	0.328	5.04	0	3	4	0	2	2257.03	695	717
Female	Isoform 2 of Submandibular gland protein C	IPI00405006	74365.1	1	10	11	58	0.000358	0.241	SSDNSSNTFREDLEK	K	I	0.95	4.48	0.301	4.8	0	4	0	0	2	1728.77	324	338
Female	Isoform 7 of Inositol 1,4,5-trisphosphate receptor type 1	IPI00117630	308645	0.998	2	2	3	1.47e-05	0.0107	ELQTMLKPGGQVDGDEALEFYA	K	K	0.95	3.71	0.163	0	0	0	2	0	1	2411.14	2128	2149
Female	Isoform 7 of Inositol 1,4,5-trisphosphate receptor type 1	IPI00117630	308645	0.998	2	2	3	1.47e-05	0.0107	VLSDVAK	R	S	0.95	0	0	3.15	1	0	0	0	2	731.43	1538	1544
Female	Isoform I of Gamma-glutamyl hydrolase	IPI00129243	35420.9	1	12	19	123	0.000599	0.297	AVQWHPEK	Y	A	0.95	2.83	0.262	0	0	3	0	0	1	994.511	239	246
Female	Isoform I of Gamma-glutamyl hydrolase	IPI00129243	35420.9	1	12	19	123	0.000599	0.297	CLGFEELSVLVSGENLLTSTDTK	T	S	0.95	3.66	0.427	0	0	1	0	0	1	2512.25	133	155
Female	Isoform I of Gamma-glutamyl hydrolase	IPI00129243	35420.9	1	12	19	123	0.000599	0.297	GFEELSVLVSGENLLTSTDTK	L	S	0.95	5.22	0.422	0	0	3	2	0	1	2239.13	135	155
Female	Isoform I of Gamma-glutamyl hydrolase	IPI00129243	35420.9	1	12	19	123	0.000599	0.297	KNSHHFENVVK	R	E	0.95	4.32	0.388	3.28	2	10	0	0	2	1338.69	280	290	IPI00828662
Female	Isoform I of Gamma-glutamyl hydrolase	IPI00129243	35420.9	1	12	19	123	0.000599	0.297	LAEFLVSEAR	Y	K	0.95	3.79	0.315	0	0	1	0	0	1	1134.62	270	279
Female	Isoform I of Gamma-glutamyl hydrolase	IPI00129243	35420.9	1	12	19	123	0.000599	0.297	NLGGISHAPNAVK	K	T	0.95	4.68	0.463	8.24	6	9	0	0	2	1277.7	253	265	IPI00828662
Female	Isoform I of Gamma-glutamyl hydrolase	IPI00129243	35420.9	1	12	19	123	0.000599	0.297	NSHHFENVVK	K	E	0.95	2.67	0.348	1.6	5	16	0	0	2	1210.6	281	290	IPI00828662
Female	Isoform I of Gamma-glutamyl hydrolase	IPI00129243	35420.9	1	12	19	123	0.000599	0.297	PIRPDLSDAEYEELFR	V	S	0.95	5.09	0.423	0	0	9	2	0	1	1949.96	72	87
Female	Isoform I of Gamma-glutamyl hydrolase	IPI00129243	35420.9	1	12	19	123	0.000599	0.297	TEFISSMEGFK	K	Y	0.95	3.81	0.369	6.35	0	1	0	0	2	1275.59	224	234	IPI00828662
Female	Isoform I of Gamma-glutamyl hydrolase	IPI00129243	35420.9	1	12	19	123	0.000599	0.297	VPIRPDLSDAEYEELFR	V	S	0.95	5.27	0.461	0	0	1	2	0	1	2049.03	71	87
Female	Isoform I of Gamma-glutamyl hydrolase	IPI00129243	35420.9	1	12	19	123	0.000599	0.297	VVPIRPDLSDAEYEELF	R	R	0.95	3.94	0.523	0	0	6	0	0	1	1992	70	86
Female	Isoform I of Gamma-glutamyl hydrolase	IPI00129243	35420.9	1	12	19	123	0.000599	0.297	VVPIRPDLSDAEYEELFR	R	S	0.95	4.96	0.444	7.2	0	34	10	0	2	2148.1	70	87	IPI00828662
Female	Isoform I of Gamma-glutamyl hydrolase	IPI00129243	35420.9	1	8	12	108	0.000527	0.158	AVQWHPEK	Y	A	0.95	2.78	0.295	0	0	3	0	0	1	994.511	239	246
Female	Isoform I of Gamma-glutamyl hydrolase	IPI00129243	35420.9	1	8	12	108	0.000527	0.158	KNSHHFENVVK	R	E	0.95	4.55	0.349	5.27	0	14	0	0	2	1338.69	280	290	IPI00828662
Female	Isoform I of Gamma-glutamyl hydrolase	IPI00129243	35420.9	1	8	12	108	0.000527	0.158	NLGGISHAPNAVK	K	T	0.95	4.81	0.419	6.7	0	16	0	0	2	1277.7	253	265	IPI00828662
Female	Isoform I of Gamma-glutamyl hydrolase	IPI00129243	35420.9	1	8	12	108	0.000527	0.158	NSHHFENVVK	K	E	0.95	2.8	0.325	1.68	3	14	0	0	2	1210.6	281	290	IPI00828662
Female	Isoform I of Gamma-glutamyl hydrolase	IPI00129243	35420.9	1	8	12	108	0.000527	0.158	PIRPDLSDAEYEELFR	V	S	0.95	4.1	0.352	0	0	5	2	0	1	1949.96	72	87
Female	Isoform I of Gamma-glutamyl hydrolase	IPI00129243	35420.9	1	8	12	108	0.000527	0.158	VPIRPDLSDAEYEELFR	V	S	0.95	5.16	0.433	0	0	5	3	0	1	2049.03	71	87
Female	Isoform I of Gamma-glutamyl hydrolase	IPI00129243	35420.9	1	8	12	108	0.000527	0.158	VVPIRPDLSDAEYEELF	R	R	0.95	4.34	0.445	0	0	3	0	0	1	1992	70	86
Female	Isoform I of Gamma-glutamyl hydrolase	IPI00129243	35420.9	1	8	12	108	0.000527	0.158	VVPIRPDLSDAEYEELFR	R	S	0.95	4.89	0.466	7.24	0	25	15	0	2	2148.1	70	87	IPI00828662
Female	Isoform I of Gamma-glutamyl hydrolase	IPI00129243	35420.9	1	9	12	79	0.000488	0.256	KFFNILTTNTDGK	K	T	0.95	4.55	0.332	8.43	0	1	0	0	2	1498.79	211	223
Female	Isoform I of Gamma-glutamyl hydrolase	IPI00129243	35420.9	1	9	12	79	0.000488	0.256	KNSHHFENVVK	R	E	0.95	4.52	0.356	4.8	0	8	0	0	2	1338.69	280	290	IPI00828662
Female	Isoform I of Gamma-glutamyl hydrolase	IPI00129243	35420.9	1	9	12	79	0.000488	0.256	NLGGISHAPNAVK	K	T	0.95	0	0	6.06	0	15	0	0	2	1277.7	253	265	IPI00828662
Female	Isoform I of Gamma-glutamyl hydrolase	IPI00129243	35420.9	1	9	12	79	0.000488	0.256	NSHHFENVVK	K	E	0.95	2.87	0.359	3.26	1	14	0	0	2	1210.6	281	290	IPI00828662
Female	Isoform I of Gamma-glutamyl hydrolase	IPI00129243	35420.9	1	9	12	79	0.000488	0.256	PIRPDLSDAEYEELFR	V	S	0.95	5.23	0.378	0	0	4	1	0	1	1949.96	72	87
Female	Isoform I of Gamma-glutamyl hydrolase	IPI00129243	35420.9	1	9	12	79	0.000488	0.256	SHHFENVVK	N	E	0.95	2.53	0.327	0	0	1	0	0	1	1096.55	282	290
Female	Isoform I of Gamma-glutamyl hydrolase	IPI00129243	35420.9	1	9	12	79	0.000488	0.256	TSFYLAEFLVSEAR	K	K	0.95	4.85	0.405	8.51	0	11	0	0	2	1632.83	266	279
Female	Isoform I of Gamma-glutamyl hydrolase	IPI00129243	35420.9	1	9	12	79	0.000488	0.256	VVPIRPDLSDAEYEELFR	R	S	0.95	4.98	0.376	7.77	0	14	1	0	2	2148.1	70	87	IPI00828662
Female	Isoform I of Gamma-glutamyl hydrolase	IPI00129243	35420.9	1	9	12	79	0.000488	0.256	YPVYAVQWHPEK	K	A	0.95	4.57	0.348	6.68	0	8	0	0	2	1516.76	235	246
Male	Isoform I of Gamma-glutamyl hydrolase	IPI00129243	35420.9	1	9	12	50	0.000239	0.218	AVQWHPEK	Y	A	0.95	2.68	0.263	0	0	3	0	0	1	994.511	239	246
Male	Isoform I of Gamma-glutamyl hydrolase	IPI00129243	35420.9	1	9	12	50	0.000239	0.218	HFPTELLDSL	K	A	0.95	2.6	0.177	0	0	1	0	0	1	1171.6	175	184
Male	Isoform I of Gamma-glutamyl hydrolase	IPI00129243	35420.9	1	9	12	50	0.000239	0.218	KNSHHFENVVK	R	E	0.95	4.56	0.365	6.12	0	9	0	0	2	1338.69	280	290	IPI00828662
Male	Isoform I of Gamma-glutamyl hydrolase	IPI00129243	35420.9	1	9	12	50	0.000239	0.218	KYIESAGAR	V	V	0.95	3.03	0.276	0	0	3	0	0	1	994.532	61	69
Male	Isoform I of Gamma-glutamyl hydrolase	IPI00129243	35420.9	1	9	12	50	0.000239	0.218	NLGGISHAPNAVK	K	T	0.95	4.58	0.414	5.41	3	4	0	0	2	1277.7	253	265	IPI00828662
Male	Isoform I of Gamma-glutamyl hydrolase	IPI00129243	35420.9	1	9	12	50	0.000239	0.218	NSHHFENVVK	K	E	0.95	2.92	0.314	3.44	1	6	0	0	2	1210.6	281	290	IPI00828662
Male	Isoform I of Gamma-glutamyl hydrolase	IPI00129243	35420.9	1	9	12	50	0.000239	0.218	VPIRPDLSDAEYEELFR	V	S	0.95	3.98	0.364	0	0	0	2	0	1	2049.03	71	87
Male	Isoform I of Gamma-glutamyl hydrolase	IPI00129243	35420.9	1	9	12	50	0.000239	0.218	VVPIRPDLSDAEYEELF	R	R	0.95	4.4	0.469	0	0	3	0	0	1	1992	70	86
Male	Isoform I of Gamma-glutamyl hydrolase	IPI00129243	35420.9	1	9	12	50	0.000239	0.218	VVPIRPDLSDAEYEELFR	R	S	0.95	4.95	0.474	4.92	0	12	3	0	2	2148.1	70	87	IPI00828662
Male	Isoform I of Gamma-glutamyl hydrolase	IPI00129243	35420.9	1	9	14	52	0.000243	0.202	HFENVVK	H	E	0.95	3.11	0.142	0	0	2	0	0	1	872.463	284	290
Male	Isoform I of Gamma-glutamyl hydrolase	IPI00129243	35420.9	1	9	14	52	0.000243	0.202	HFPTELLDSLALENL	K	T	0.95	4.9	0.28	0	0	1	0	0	1	1711.89	175	189
Male	Isoform I of Gamma-glutamyl hydrolase	IPI00129243	35420.9	1	9	14	52	0.000243	0.202	KNSHHFENVVK	R	E	0.95	4.35	0.401	6.36	0	9	1	0	2	1338.69	280	290	IPI00828662
Male	Isoform I of Gamma-glutamyl hydrolase	IPI00129243	35420.9	1	9	14	52	0.000243	0.202	NLGGISHAPNAVK	K	T	0.95	4.41	0.445	9.72	3	3	0	0	2	1277.7	253	265	IPI00828662
Male	Isoform I of Gamma-glutamyl hydrolase	IPI00129243	35420.9	1	9	14	52	0.000243	0.202	NSHHFENVVK	K	E	0.95	2.84	0.311	2.38	2	3	0	0	2	1210.6	281	290	IPI00828662
Male	Isoform I of Gamma-glutamyl hydrolase	IPI00129243	35420.9	1	9	14	52	0.000243	0.202	PIRPDLSDAEYEELFR	V	S	0.95	5.26	0.48	0	0	3	1	0	1	1949.96	72	87
Male	Isoform I of Gamma-glutamyl hydrolase	IPI00129243	35420.9	1	9	14	52	0.000243	0.202	VQWHPEK	A	A	0.95	2.66	0.14	0	0	1	0	0	1	923.474	240	246
Male	Isoform I of Gamma-glutamyl hydrolase	IPI00129243	35420.9	1	9	14	52	0.000243	0.202	VVPIRPDLSDAEYEELF	R	R	0.95	4.3	0.499	0	0	6	0	0	1	1992	70	86
Male	Isoform I of Gamma-glutamyl hydrolase	IPI00129243	35420.9	1	9	14	52	0.000243	0.202	VVPIRPDLSDAEYEELFR	R	S	0.95	4.89	0.461	6.38	0	12	5	0	2	2148.1	70	87	IPI00828662
Male	Isoform I of Gamma-glutamyl hydrolase	IPI00129243	35420.9	1	9	11	72	0.000365	0.211	IRPDLSDAEYEELFR	P	S	0.95	3.11	0.313	0	0	1	0	0	1	1852.91	73	87
Male	Isoform I of Gamma-glutamyl hydrolase	IPI00129243	35420.9	1	9	11	72	0.000365	0.211	KFFNILTTNTDGK	K	T	0.95	0	0	9.21	0	2	0	0	2	1498.79	211	223
Male	Isoform I of Gamma-glutamyl hydrolase	IPI00129243	35420.9	1	9	11	72	0.000365	0.211	KNSHHFENVVK	R	E	0.95	4.53	0.327	5.96	0	2	0	0	2	1338.69	280	290	IPI00828662
Male	Isoform I of Gamma-glutamyl hydrolase	IPI00129243	35420.9	1	9	11	72	0.000365	0.211	NLGGISHAPNAVK	K	T	0.95	4.76	0.419	6.8	0	17	0	0	2	1277.7	253	265	IPI00828662
Male	Isoform I of Gamma-glutamyl hydrolase	IPI00129243	35420.9	1	9	11	72	0.000365	0.211	NSHHFENVVK	K	E	0.95	2.79	0.318	3.44	0	13	0	0	2	1210.6	281	290	IPI00828662
Male	Isoform I of Gamma-glutamyl hydrolase	IPI00129243	35420.9	1	9	11	72	0.000365	0.211	PIRPDLSDAEYEELFR	V	S	0.95	5.43	0.415	0	0	7	2	0	1	1949.96	72	87
Male	Isoform I of Gamma-glutamyl hydrolase	IPI00129243	35420.9	1	9	11	72	0.000365	0.211	SHHFENVVK	N	E	0.95	2.56	0.366	0	0	1	0	0	1	1096.55	282	290
Male	Isoform I of Gamma-glutamyl hydrolase	IPI00129243	35420.9	1	9	11	72	0.000365	0.211	VVPIRPDLSDAEYEELFR	R	S	0.95	4.9	0.442	8.48	0	11	7	0	2	2148.1	70	87	IPI00828662
Male	Isoform I of Gamma-glutamyl hydrolase	IPI00129243	35420.9	1	9	11	72	0.000365	0.211	YPVYAVQWHPEK	K	A	0.95	4.62	0.356	5.03	0	9	0	0	2	1516.76	235	246
Female	Kallikrein 1-related peptidase b1	IPI00134580	29004.2	0.998	2	3	5	2.43e-05	0.0728	LSKPADITDVVKPIALPTE	R	E	0.95	3.95	0.429	4.74	0	1	3	0	1	2007.14	126	144	IPI00121821,IPI00121818
Female	Kallikrein 1-related peptidase b1	IPI00134580	29004.2	0.998	2	3	5	2.43e-05	0.0728	PADITDVVKPIALPTE	K	E	0.95	4.09	0.354	0	0	0	1	0	0	1678.93	129	144	IPI00121818
Male	Kallikrein 1-related peptidase b1	IPI00134580	29004.2	1	9	13	46	0.00022	0.287	DLQCVNLK	K	L	0.95	2.6	0.115	2.28	3	1	0	0	2	989.509	170	177	IPI00112184,IPI00136040
Male	Kallikrein 1-related peptidase b1	IPI00134580	29004.2	1	9	13	46	0.00022	0.287	DTCKGDSGGPLICDGVLQGLTSW	K	G	0.95	6.78	0.257	0	0	3	0	0	1	2436.12	207	229	IPI00134582
Male	Kallikrein 1-related peptidase b1	IPI00134580	29004.2	1	9	13	46	0.00022	0.287	GDSGGPLICDGVLQGLTSW	K	G	0.95	3.5	0.158	0	0	2	0	0	1	1931.92	211	229	IPI00134582
Male	Kallikrein 1-related peptidase b1	IPI00134580	29004.2	1	9	13	46	0.00022	0.287	KLLPNEDCDK	L	A	0.95	3.03	0.243	0	0	5	0	0	1	1231.6	177	186
Male	Kallikrein 1-related peptidase b1	IPI00134580	29004.2	1	9	13	46	0.00022	0.287	KPIALPTEEPK	V	L	0.95	3.25	0.417	0	1	9	0	0	1	1222.7	137	147
Male	Kallikrein 1-related peptidase b1	IPI00134580	29004.2	1	9	13	46	0.00022	0.287	LSKPADITDVVKPIALPTE	R	E	0.95	4.15	0.454	7.48	0	2	2	0	1	2007.14	126	144	IPI00121821,IPI00121818
Male	Kallikrein 1-related peptidase b1	IPI00134580	29004.2	1	9	13	46	0.00022	0.287	LSKPADITDVVKPIALPTEEPK	R	L	0.95	4.56	0.48	5	0	16	21	0	2	2361.33	126	147	IPI00136040
Male	Kallikrein 1-related peptidase b1	IPI00134580	29004.2	1	9	13	46	0.00022	0.287	NNLYQDEPSAQHR	K	L	0.95	4.49	0.434	8.85	0	6	0	0	2	1571.72	78	90
Male	Kallikrein 1-related peptidase b1	IPI00134580	29004.2	1	9	13	46	0.00022	0.287	PADITDVVKPIALPTE	K	E	0.95	4.37	0.438	0	0	1	2	0	0	1678.93	129	144	IPI00121818
Male	Kallikrein 1-related peptidase b1	IPI00134580	29004.2	1	9	13	46	0.00022	0.287	PADITDVVKPIALPTEEPK	K	L	0.95	5.15	0.45	0	0	5	8	0	1	2033.12	129	147
Male	Kallikrein 1-related peptidase b1	IPI00134580	29004.2	1	9	13	46	0.00022	0.287	QDEPSAQHR	Y	L	0.95	2.95	0.193	0	0	1	0	0	1	1067.49	82	90	IPI00134582
Male	Kallikrein 1-related peptidase b1	IPI00134580	29004.2	1	6	8	56	0.000262	0.261	DLQCVNLK	K	L	0.95	2.36	0.0965	2.05	3	1	0	0	2	989.509	170	177	IPI00112184,IPI00136040
Male	Kallikrein 1-related peptidase b1	IPI00134580	29004.2	1	6	8	56	0.000262	0.261	IVGGFK	R	C	0.95	1.85	0.124	0.886	1	0	0	0	2	620.377	25	30	IPI00136040,IPI00113575,IPI00134582
Male	Kallikrein 1-related peptidase b1	IPI00134580	29004.2	1	6	8	56	0.000262	0.261	KPGVYTK	K	L	0.95	2.04	0.0948	1.39	2	0	0	0	2	792.462	239	245	IPI00136040
Male	Kallikrein 1-related peptidase b1	IPI00134580	29004.2	1	6	8	56	0.000262	0.261	LSKPADITDVVKPIALPTE	R	E	0.95	4.26	0.337	3.7	0	0	1	0	1	2007.14	126	144	IPI00121821,IPI00121818
Male	Kallikrein 1-related peptidase b1	IPI00134580	29004.2	1	6	8	56	0.000262	0.261	LSKPADITDVVKPIALPTEEPK	R	L	0.95	6.25	0.496	6.82	0	6	10	0	2	2361.33	126	147	IPI00136040
Male	Kallikrein 1-related peptidase b1	IPI00134580	29004.2	1	6	8	56	0.000262	0.261	NNLYQDEPSAQHR	K	L	0.95	4.42	0.408	8.1	0	3	0	0	2	1571.72	78	90
Male	Kallikrein 1-related peptidase b1	IPI00134580	29004.2	1	6	8	56	0.000262	0.261	PADITDVVKPIALPTE	K	E	0.95	4.06	0.434	0	0	3	4	0	0	1678.93	129	144	IPI00121818
Male	Kallikrein 1-related peptidase b1	IPI00134580	29004.2	1	6	8	56	0.000262	0.261	PADITDVVKPIALPTEEPK	K	L	0.95	5.06	0.444	0	0	20	22	0	1	2033.12	129	147
Male	Kallikrein 1-related peptidase b1	IPI00134580	29004.2	1	6	8	56	0.000262	0.261	QDEPSAQHR	Y	L	0.95	3.14	0.181	0	0	1	0	0	1	1067.49	82	90	IPI00134582
Male	Kallikrein 1-related peptidase b1	IPI00134580	29004.2	1	6	8	56	0.000262	0.261	TSWGYNPCGEPK	L	K	0.95	3.38	0.346	0	0	2	0	0	1	1395.6	227	238
Male	Kallikrein 1-related peptidase b1	IPI00134580	29004.2	1	9	11	61	0.00031	0.375	DLQCVNLK	K	L	0.95	2.61	0.12	2.74	8	0	0	0	2	989.509	170	177	IPI00112184,IPI00136040
Male	Kallikrein 1-related peptidase b1	IPI00134580	29004.2	1	9	11	61	0.00031	0.375	GDSGGPLICDGVLQGLTSWGYNPCGEPK	K	K	0.95	6.24	0.552	10.6	0	3	0	0	2	2934.34	211	238
Male	Kallikrein 1-related peptidase b1	IPI00134580	29004.2	1	9	11	61	0.00031	0.375	GDSGGPLICDGVLQGLTSWGYNPCGEPKK	K	P	0.95	3.63	0.163	0	0	0	1	0	1	3005.41	211	239
Male	Kallikrein 1-related peptidase b1	IPI00134580	29004.2	1	9	11	61	0.00031	0.375	KLLPNEDCDK	L	A	0.95	3.03	0.243	0	0	2	0	0	1	1231.6	177	186
Male	Kallikrein 1-related peptidase b1	IPI00134580	29004.2	1	9	11	61	0.00031	0.375	KPGVYTK	K	L	0.95	2.44	0.311	2.43	27	0	0	0	2	792.462	239	245	IPI00136040
Male	Kallikrein 1-related peptidase b1	IPI00134580	29004.2	1	9	11	61	0.00031	0.375	LSKPADITDVVKPIALPTE	R	E	0.95	3.77	0.484	3.85	0	4	8	0	1	2007.14	126	144	IPI00121821,IPI00121818
Male	Kallikrein 1-related peptidase b1	IPI00134580	29004.2	1	9	11	61	0.00031	0.375	LSKPADITDVVKPIALPTEEPK	R	L	0.95	6.32	0.45	9.62	0	15	20	0	2	2361.33	126	147	IPI00136040
Male	Kallikrein 1-related peptidase b1	IPI00134580	29004.2	1	9	11	61	0.00031	0.375	NNLYQDEPSAQHR	K	L	0.95	4.79	0.414	7.46	0	21	0	0	2	1571.72	78	90
Male	Kallikrein 1-related peptidase b1	IPI00134580	29004.2	1	9	11	61	0.00031	0.375	NSQPWHVAVYR	K	Y	0.95	4.06	0.483	7.31	38	78	0	0	2	1356.68	34	44	IPI00136040,IPI00136034,IPI00134582
Male	Kallikrein 1-related peptidase b1	IPI00134580	29004.2	1	9	11	61	0.00031	0.375	PADITDVVKPIALPTE	K	E	0.95	5.3	0.363	0	0	1	0	0	0	1678.93	129	144	IPI00121818
Male	Kallikrein 1-related peptidase b1	IPI00134580	29004.2	1	9	11	61	0.00031	0.375	PADITDVVKPIALPTEEPK	K	L	0.95	5.95	0.452	0	0	6	7	0	1	2033.12	129	147
Male	Kallikrein 1-related peptidase b1	IPI00134580	29004.2	1	9	11	61	0.00031	0.375	PWHVAVYR	Q	Y	0.95	2.78	0.295	0	0	3	0	0	1	1027.55	37	44
Male	Kallikrein 1-related peptidase b1	IPI00134580	29004.2	1	9	11	61	0.00031	0.375	SQPWHVAVYR	N	Y	0.95	3.25	0.337	0	0	5	0	0	1	1242.64	35	44
Male	Kallikrein 1-related peptidase b11	IPI00136034	28709.5	1	5	6	38	0.000182	0.299	FQTPDDLQCVSIK	K	L	0.95	0	0	6.77	0	9	0	0	2	1550.75	165	177
Male	Kallikrein 1-related peptidase b11	IPI00136034	28709.5	1	5	6	38	0.000182	0.299	GDSGGPLICDGVLHGITAW	K	G	0.95	4.45	0.534	0	0	4	0	0	1	1924.92	211	229
Male	Kallikrein 1-related peptidase b11	IPI00136034	28709.5	1	5	6	38	0.000182	0.299	LSEPADITDAVKPIALPTEEPK	R	L	0.95	5.26	0.463	5.39	0	9	7	0	2	2334.24	126	147
Male	Kallikrein 1-related peptidase b11	IPI00136034	28709.5	1	5	6	38	0.000182	0.299	NWVLTAAHCHVSQY	R	N	0.95	4.91	0.484	0	0	2	0	0	1	1685.79	58	71
Male	Kallikrein 1-related peptidase b11	IPI00136034	28709.5	1	5	6	38	0.000182	0.299	YICGGVLLDR	K	N	0.95	3.32	0.299	4.49	0	7	0	0	2	1165.6	48	57
Male	Kallikrein 1-related peptidase b11	IPI00136034	28709.5	1	7	9	66	0.000309	0.326	FQTPDDLQCVSIK	K	L	0.95	0	0	6.55	0	6	0	0	2	1550.75	165	177
Male	Kallikrein 1-related peptidase b11	IPI00136034	28709.5	1	7	9	66	0.000309	0.326	GDSGGPLICDGVLHGITAW	K	G	0.95	4.48	0.489	0	0	1	0	0	1	1924.92	211	229
Male	Kallikrein 1-related peptidase b11	IPI00136034	28709.5	1	7	9	66	0.000309	0.326	GDSGGPLICDGVLHGITAWGPIPCGK	K	P	0.95	5.75	0.535	0	0	0	2	0	1	2634.28	211	236
Male	Kallikrein 1-related peptidase b11	IPI00136034	28709.5	1	7	9	66	0.000309	0.326	LSEPADITDAVKPIALPTEEPK	R	L	0.95	4.03	0.447	3.66	0	22	10	0	2	2334.24	126	147
Male	Kallikrein 1-related peptidase b11	IPI00136034	28709.5	1	7	9	66	0.000309	0.326	NWVLTAAHCHVSQY	R	N	0.95	4.74	0.508	0	0	2	0	0	1	1685.79	58	71
Male	Kallikrein 1-related peptidase b11	IPI00136034	28709.5	1	7	9	66	0.000309	0.326	PDDLQCVSIK	T	L	0.95	3.08	0.169	0	1	0	0	0	1	1174.58	168	177
Male	Kallikrein 1-related peptidase b11	IPI00136034	28709.5	1	7	9	66	0.000309	0.326	YICGGVLLDR	K	N	0.95	3.63	0.371	5.02	5	17	0	0	2	1165.6	48	57
Male	Kallikrein 1-related peptidase b11	IPI00136034	28709.5	1	7	8	49	0.000249	0.33	FQTPDDLQCVSIK	K	L	0.95	0	0	6.66	0	3	0	0	2	1550.75	165	177
Male	Kallikrein 1-related peptidase b11	IPI00136034	28709.5	1	7	8	49	0.000249	0.33	GKPNTPGVYTK	C	L	0.95	2.86	0.328	0	0	21	0	0	1	1161.63	235	245
Male	Kallikrein 1-related peptidase b11	IPI00136034	28709.5	1	7	8	49	0.000249	0.33	IVGGFNCEK	R	N	0.95	2.6	0.0928	2.37	1	0	0	0	2	1023.49	25	33	IPI00323869,IPI00124822
Male	Kallikrein 1-related peptidase b11	IPI00136034	28709.5	1	7	8	49	0.000249	0.33	KPNTPGVYTK	G	L	0.95	2.93	0.246	0	0	1	0	0	1	1104.61	236	245
Male	Kallikrein 1-related peptidase b11	IPI00136034	28709.5	1	7	8	49	0.000249	0.33	LSEPADITDAVKPIALPTEEPK	R	L	0.95	5.27	0.478	10.4	0	8	10	0	2	2334.24	126	147
Male	Kallikrein 1-related peptidase b11	IPI00136034	28709.5	1	7	8	49	0.000249	0.33	NSQPWHVAVYR	K	Y	0.95	3.87	0.404	8.46	38	78	0	0	2	1356.68	34	44	IPI00136040,IPI00134582,IPI00134580
Male	Kallikrein 1-related peptidase b11	IPI00136034	28709.5	1	7	8	49	0.000249	0.33	NWVLTAAHCHVSQY	R	N	0.95	4.43	0.376	0	0	1	0	0	1	1685.79	58	71
Male	Kallikrein 1-related peptidase b11	IPI00136034	28709.5	1	7	8	49	0.000249	0.33	NWVLTAAHCHVSQYNVWLGK	R	T	0.95	0	0	6.05	0	0	4	0	2	2383.18	58	77
Male	Kallikrein 1-related peptidase b16	IPI00113575	28704.9	1	7	11	46	0.00022	0.138	EHICGGVLLDR	K	N	0.95	0	0	6.19	2	17	0	0	2	1268.64	47	57	IPI00121821,IPI00121818
Male	Kallikrein 1-related peptidase b16	IPI00113575	28704.9	1	7	11	46	0.00022	0.138	HKEHICGGVLLDR	Y	N	0.95	3.93	0.345	0	0	4	1	0	1	1533.8	45	57
Male	Kallikrein 1-related peptidase b16	IPI00113575	28704.9	1	7	11	46	0.00022	0.138	ICGGVLLDR	H	N	0.95	3.43	0.251	0	0	2	0	0	1	1002.54	49	57	IPI00136038
Male	Kallikrein 1-related peptidase b16	IPI00113575	28704.9	1	7	11	46	0.00022	0.138	LSKPADITDVV	R	K	0.95	3.48	0.243	0	0	4	0	0	1	1157.64	126	136
Male	Kallikrein 1-related peptidase b16	IPI00113575	28704.9	1	7	11	46	0.00022	0.138	LSKPADITDVVKPIDLPTK	R	E	0.95	5.21	0.433	10.3	0	3	7	0	2	2050.18	126	144
Male	Kallikrein 1-related peptidase b16	IPI00113575	28704.9	1	7	11	46	0.00022	0.138	LSKPADITDVVKPIDLPTKEPK	R	L	0.95	0	0	7.01	0	2	3	0	2	2404.37	126	147
Male	Kallikrein 1-related peptidase b16	IPI00113575	28704.9	1	7	11	46	0.00022	0.138	YHKEHICGGVLLDR	Y	N	0.95	4.44	0.395	0	0	1	0	0	1	1696.86	44	57
Male	Kallikrein 1-related peptidase b16	IPI00113575	28704.9	1	12	15	50	0.000234	0.345	EHICGGVLLDR	K	N	0.95	3.19	0.431	6.72	1	14	0	0	2	1268.64	47	57	IPI00121821,IPI00121818
Male	Kallikrein 1-related peptidase b16	IPI00113575	28704.9	1	12	15	50	0.000234	0.345	HCYVDECEVWLGK	A	N	0.95	5.14	0.359	0	0	1	0	0	1	1694.73	65	77
Male	Kallikrein 1-related peptidase b16	IPI00113575	28704.9	1	12	15	50	0.000234	0.345	HKEHICGGVLLDR	Y	N	0.95	4.39	0.288	0	0	4	1	0	1	1533.8	45	57
Male	Kallikrein 1-related peptidase b16	IPI00113575	28704.9	1	12	15	50	0.000234	0.345	ICGGVLLDR	H	N	0.95	3.54	0.271	0	0	9	0	0	1	1002.54	49	57	IPI00136038
Male	Kallikrein 1-related peptidase b16	IPI00113575	28704.9	1	12	15	50	0.000234	0.345	IVGGFK	R	C	0.95	1.85	0.124	0.886	1	0	0	0	2	620.377	25	30	IPI00136040,IPI00134582,IPI00134580
Male	Kallikrein 1-related peptidase b16	IPI00113575	28704.9	1	12	15	50	0.000234	0.345	LSKPADITDVVK	R	P	0.95	3.61	0.254	0	0	2	3	0	1	1285.74	126	137
Male	Kallikrein 1-related peptidase b16	IPI00113575	28704.9	1	12	15	50	0.000234	0.345	LSKPADITDVVKPIDLPTK	R	E	0.95	4.28	0	3.4	0	1	0	0	2	2050.18	126	144
Male	Kallikrein 1-related peptidase b16	IPI00113575	28704.9	1	12	15	50	0.000234	0.345	NQLFQEEPSAQNR	K	L	0.95	5.3	0.338	7.11	0	1	0	0	2	1560.74	78	90
Male	Kallikrein 1-related peptidase b16	IPI00113575	28704.9	1	12	15	50	0.000234	0.345	NWVLTAAHCY	R	V	0.95	3.66	0.407	0	0	2	0	0	1	1234.57	58	67
Male	Kallikrein 1-related peptidase b16	IPI00113575	28704.9	1	12	15	50	0.000234	0.345	PADITDVVKPIDLPTK	K	E	0.95	5.19	0.438	0	0	4	0	0	1	1721.97	129	144
Male	Kallikrein 1-related peptidase b16	IPI00113575	28704.9	1	12	15	50	0.000234	0.345	SNDLMLLR	F	L	0.95	3.44	0.194	2.92	0	2	0	0	1	961.514	118	125	IPI00124824,IPI00124804
Male	Kallikrein 1-related peptidase b16	IPI00113575	28704.9	1	12	15	50	0.000234	0.345	VDECEVWLGK	Y	N	0.95	4.01	0.295	0	0	2	0	0	1	1234.58	68	77
Male	Kallikrein 1-related peptidase b16	IPI00113575	28704.9	1	12	15	50	0.000234	0.345	WQKPDDLQCMF	K	T	0.95	3.99	0.294	0	0	3	0	0	1	1467.64	165	175
Male	Kallikrein 1-related peptidase b16	IPI00113575	28704.9	1	10	14	100	0.000508	0.475	EHICGGVLLDR	K	N	0.95	3.11	0.353	6.47	12	35	0	0	2	1268.64	47	57	IPI00121821,IPI00121818
Male	Kallikrein 1-related peptidase b16	IPI00113575	28704.9	1	10	14	100	0.000508	0.475	LDSTCLVSGWGSITPTK	K	W	0.95	0	0	7.42	0	5	0	0	2	1821.91	148	164
Male	Kallikrein 1-related peptidase b16	IPI00113575	28704.9	1	10	14	100	0.000508	0.475	LPPGADFSNDLMLLR	K	L	0.95	4.6	0.508	9.01	0	2	0	0	2	1658.86	111	125	IPI00121818
Male	Kallikrein 1-related peptidase b16	IPI00113575	28704.9	1	10	14	100	0.000508	0.475	LSKPADITDVVKPIDLPTK	R	E	0.95	5.71	0.457	8.7	0	5	1	0	2	2050.18	126	144
Male	Kallikrein 1-related peptidase b16	IPI00113575	28704.9	1	10	14	100	0.000508	0.475	LSKPADITDVVKPIDLPTKEPK	R	L	0.95	0	0	6.92	0	1	1	0	2	2404.37	126	147
Male	Kallikrein 1-related peptidase b16	IPI00113575	28704.9	1	10	14	100	0.000508	0.475	NQLFQEEPSAQNR	K	L	0.95	5.45	0.404	8.96	0	3	0	0	2	1560.74	78	90
Male	Kallikrein 1-related peptidase b16	IPI00113575	28704.9	1	10	14	100	0.000508	0.475	NSQPWQVAVYYHK	K	E	0.95	4.08	0.456	8.72	0	15	0	0	2	1619.8	34	46
Male	Kallikrein 1-related peptidase b16	IPI00113575	28704.9	1	10	14	100	0.000508	0.475	NWVLTAAHCYVDECEVWLGK	R	N	0.95	5.97	0.456	0	0	11	3	0	2	2450.13	58	77
Male	Kallikrein 1-related peptidase b16	IPI00113575	28704.9	1	10	14	100	0.000508	0.475	SNDLMLLR	F	L	0.95	2.79	0.126	1.39	1	0	0	0	1	961.514	118	125	IPI00124824,IPI00124804
Male	Kallikrein 1-related peptidase b16	IPI00113575	28704.9	1	10	14	100	0.000508	0.475	WQKPDDLQCMFTK	K	L	0.95	0	0	8.47	0	5	0	0	2	1696.78	165	177
Male	Kallikrein 1-related peptidase b21	IPI00124822	28672.8	0.998	2	4	8	3.74e-05	0.172	GITSWGSIPCAK	Q	P	0.95	3.96	0.407	0	0	2	0	0	0	1276.64	225	236
Male	Kallikrein 1-related peptidase b21	IPI00124822	28672.8	0.998	2	4	8	3.74e-05	0.172	LFQHESSAQHR	K	L	0.95	3.85	0.276	3.6	2	3	1	0	2	1339.65	80	90
Male	Kallikrein 1-related peptidase b21	IPI00124822	28672.8	0.998	2	4	8	3.74e-05	0.172	LSKPADITDAVKPIDLPTEEPK	R	L	0.95	5.32	0.402	8.32	0	2	4	0	2	2377.29	126	147	IPI00124824
Male	Kallikrein 1-related peptidase b21	IPI00124822	28672.8	1	3	4	36	0.000183	0.268	FQHESSAQHR	L	L	0.95	2.76	0.251	0	0	5	0	0	1	1226.57	81	90
Male	Kallikrein 1-related peptidase b21	IPI00124822	28672.8	1	3	4	36	0.000183	0.268	HESSAQHR	Q	L	0.95	2.57	0.216	0	0	1	0	0	1	951.44	83	90
Male	Kallikrein 1-related peptidase b21	IPI00124822	28672.8	1	3	4	36	0.000183	0.268	IVGGFNCEK	R	N	0.95	2.6	0.0928	2.37	1	0	0	0	2	1023.49	25	33	IPI00323869,IPI00136034
Male	Kallikrein 1-related peptidase b21	IPI00124822	28672.8	1	3	4	36	0.000183	0.268	LFQHESSAQHR	K	L	0.95	3.05	0.361	4.64	0	27	3	0	2	1339.65	80	90
Male	Kallikrein 1-related peptidase b21	IPI00124822	28672.8	1	3	4	36	0.000183	0.268	LGSTCLASGWGSITPTK	K	W	0.95	0	0	9.68	0	3	0	0	2	1735.87	148	164	IPI00124824,IPI00134582,IPI00130801,IPI00124804
Male	Kallikrein 1-related peptidase b21	IPI00124822	28672.8	1	3	4	36	0.000183	0.268	LSKPADITDAVKPIDLPTEEPK	R	L	0.95	5.85	0.377	8.96	0	6	5	0	2	2377.29	126	147	IPI00124824
Male	Kallikrein 1-related peptidase b21	IPI00124822	28672.8	1	3	4	36	0.000183	0.268	NSQPWHVAVFR	K	Y	0.95	3.81	0.418	5.8	0	5	0	0	2	1340.69	34	44	IPI00124804
Male	Kallikrein 1-related peptidase b22	IPI00136038	28366.7	1	7	10	51	0.000244	0.27	IYQNPNDLQCVSIK	L	L	0.95	4.57	0.307	0	0	3	0	0	1	1691.84	162	175
Male	Kallikrein 1-related peptidase b22	IPI00136038	28366.7	1	7	10	51	0.000244	0.27	LCGGVLLDR	Y	N	0.95	3.43	0.251	0	0	2	0	0	1	1002.54	49	57	IPI00113575
Male	Kallikrein 1-related peptidase b22	IPI00136038	28366.7	1	7	10	51	0.000244	0.27	LFQDEPSAQHR	K	L	0.95	3.63	0.178	4.52	4	8	0	0	2	1327.64	80	90
Male	Kallikrein 1-related peptidase b22	IPI00136038	28366.7	1	7	10	51	0.000244	0.27	LHPNEVCVK	K	A	0.95	0	0	3.77	6	0	0	0	2	1095.56	176	184
Male	Kallikrein 1-related peptidase b22	IPI00136038	28366.7	1	7	10	51	0.000244	0.27	LSKPADITDVVKPIDLPTTEPK	R	L	0.95	5.76	0.423	4.3	0	5	9	0	2	2377.32	124	145
Male	Kallikrein 1-related peptidase b22	IPI00136038	28366.7	1	7	10	51	0.000244	0.27	PADITDVVKPIDLPTTEPK	K	L	0.95	4.8	0.497	0	0	5	4	0	1	2049.11	127	145
Male	Kallikrein 1-related peptidase b22	IPI00136038	28366.7	1	7	10	51	0.000244	0.27	QNPNDLQCVSIK	Y	L	0.95	3.53	0.322	0	0	6	0	0	1	1415.7	164	175
Male	Kallikrein 1-related peptidase b22	IPI00136038	28366.7	1	7	10	51	0.000244	0.27	YLDEYLCGGVLLDR	Y	N	0.95	5.35	0.421	0	0	1	0	0	1	1685.82	44	57
Male	Kallikrein 1-related peptidase b22	IPI00136038	28366.7	1	8	11	56	0.000262	0.398	GDSGGPLICDGVLQGITSWGSTPCGEPNAPAIY	K	T	0.95	5.7	0.61	0	0	0	2	0	1	3346.54	209	241
Male	Kallikrein 1-related peptidase b22	IPI00136038	28366.7	1	8	11	56	0.000262	0.398	IYQNPNDLQCVSIK	L	L	0.95	5.1	0.334	0	0	3	0	0	1	1691.84	162	175
Male	Kallikrein 1-related peptidase b22	IPI00136038	28366.7	1	8	11	56	0.000262	0.398	LCGGVLLDR	Y	N	0.95	3.54	0.271	0	0	9	0	0	1	1002.54	49	57	IPI00113575
Male	Kallikrein 1-related peptidase b22	IPI00136038	28366.7	1	8	11	56	0.000262	0.398	LFQDEPSAQHR	K	L	0.95	2.78	0.173	2.77	3	6	0	0	2	1327.64	80	90
Male	Kallikrein 1-related peptidase b22	IPI00136038	28366.7	1	8	11	56	0.000262	0.398	LHPNEVCVK	K	A	0.95	0	0	4.19	6	0	0	0	2	1095.56	176	184
Male	Kallikrein 1-related peptidase b22	IPI00136038	28366.7	1	8	11	56	0.000262	0.398	LSKPADITDVVKPIDLPTTEPK	R	L	0.95	5.66	0.419	2.62	0	5	1	0	2	2377.32	124	145
Male	Kallikrein 1-related peptidase b22	IPI00136038	28366.7	1	8	11	56	0.000262	0.398	PADITDVVKPIDLPTTEPK	K	L	0.95	5.77	0.464	0	0	4	9	0	1	2049.11	127	145
Male	Kallikrein 1-related peptidase b22	IPI00136038	28366.7	1	8	11	56	0.000262	0.398	QNPNDLQCVSIK	Y	L	0.95	3.43	0.356	0	0	4	0	0	1	1415.7	164	175
Male	Kallikrein 1-related peptidase b22	IPI00136038	28366.7	1	8	11	56	0.000262	0.398	YLDEYLCGGVLLDR	Y	N	0.95	5.35	0.449	0	0	13	0	0	1	1685.82	44	57
Male	Kallikrein 1-related peptidase b22	IPI00136038	28366.7	1	10	13	133	0.000675	0.51	LFQDEPSAQHR	K	L	0.95	0	0	5.74	8	38	0	0	2	1327.64	80	90
Male	Kallikrein 1-related peptidase b22	IPI00136038	28366.7	1	10	13	133	0.000675	0.51	LGSTCLASGWGSINQLIYQNPNDLQCVSIK	K	L	0.95	0	0	12.7	0	0	8	0	2	3336.64	146	175
Male	Kallikrein 1-related peptidase b22	IPI00136038	28366.7	1	10	13	133	0.000675	0.51	LHPNEVCVK	K	A	0.95	2.49	0.165	4.01	6	6	0	0	2	1095.56	176	184
Male	Kallikrein 1-related peptidase b22	IPI00136038	28366.7	1	10	13	133	0.000675	0.51	LSKPADITDVVKPIDLPTTEPK	R	L	0.95	5.53	0.464	4.48	0	10	11	0	2	2377.32	124	145
Male	Kallikrein 1-related peptidase b22	IPI00136038	28366.7	1	10	13	133	0.000675	0.51	NSQPWQVAVYYLDEYLCGGVLLDR	K	N	0.95	4.9	0.492	0	0	1	0	0	2	2858.38	34	57	IPI00121821,IPI00121818
Male	Kallikrein 1-related peptidase b22	IPI00136038	28366.7	1	10	13	133	0.000675	0.51	NWVLTAAHCYEDK	R	Y	0.95	0	0	11.5	0	27	0	0	2	1606.73	58	70
Male	Kallikrein 1-related peptidase b22	IPI00136038	28366.7	1	10	13	133	0.000675	0.51	NWVLTAAHCYEDKY	R	N	0.95	5.46	0.501	0	0	6	0	0	1	1769.8	58	71
Male	Kallikrein 1-related peptidase b22	IPI00136038	28366.7	1	10	13	133	0.000675	0.51	PADITDVVKPIDLPTTEPK	K	L	0.95	5.06	0.398	0	0	0	5	0	1	2049.11	127	145
Male	Kallikrein 1-related peptidase b22	IPI00136038	28366.7	1	10	13	133	0.000675	0.51	SVPTGADLSNDLMLLR	Q	L	0.95	4.62	0.391	0	0	1	0	0	1	1701.88	108	123
Male	Kallikrein 1-related peptidase b22	IPI00136038	28366.7	1	10	13	133	0.000675	0.51	YLDEYLCGGVLLDR	Y	N	0.95	4.98	0.432	0	0	3	0	0	1	1685.82	44	57
Male	Kallikrein 1-related peptidase b22	IPI00136038	28366.7	1	10	13	133	0.000675	0.51	YNIWLGK	K	N	0.95	2.45	0.193	1.02	4	0	0	0	2	893.489	71	77
Male	Kallikrein 1-related peptidase b24	IPI00124804	28909.2	1	2	3	10	4.78e-05	0.0837	LSEPADITDAVKPIDLPTEEPK	R	L	0.95	6.47	0.355	3.19	0	4	4	0	2	2378.23	128	149
Male	Kallikrein 1-related peptidase b24	IPI00124804	28909.2	1	2	3	10	4.78e-05	0.0837	PADITDAVKPIDLPTEEPK	E	L	0.95	4.32	0.236	0	0	0	2	0	1	2049.08	131	149
Male	Kallikrein 1-related peptidase b24	IPI00124804	28909.2	1	3	5	28	0.000131	0.156	ASGWGSITPTK	L	W	0.95	3.36	0.226	0	0	3	0	0	1	1104.57	156	166
Male	Kallikrein 1-related peptidase b24	IPI00124804	28909.2	1	3	5	28	0.000131	0.156	LSEPADITDAVKPIDLPTEEPK	R	L	0.95	6.23	0.392	3.18	0	1	3	0	2	2378.23	128	149
Male	Kallikrein 1-related peptidase b24	IPI00124804	28909.2	1	3	5	28	0.000131	0.156	PADITDAVKPIDLPTEEPK	E	L	0.95	5.7	0.411	0	0	13	8	0	1	2049.08	131	149
Male	Kallikrein 1-related peptidase b24	IPI00124804	28909.2	1	3	5	28	0.000131	0.156	SNDLMLLR	K	L	0.95	3.44	0.194	2.92	0	2	0	0	2	961.514	120	127	IPI00113575,IPI00124824
Male	Kallikrein 1-related peptidase b24	IPI00124804	28909.2	1	3	4	13	6.6e-05	0.27	LGSTCLASGWGSITPTK	K	W	0.95	0	0	9.68	0	3	0	0	2	1735.87	150	166	IPI00124822,IPI00124824,IPI00134582,IPI00130801
Male	Kallikrein 1-related peptidase b24	IPI00124804	28909.2	1	3	4	13	6.6e-05	0.27	LSEPADITDAVKPIDLPTEEPK	R	L	0.95	3.85	0.247	5.07	0	0	6	0	2	2378.23	128	149
Male	Kallikrein 1-related peptidase b24	IPI00124804	28909.2	1	3	4	13	6.6e-05	0.27	NKLFQREPSAQHR	K	W	0.95	3.87	0.149	1.7	0	17	0	0	2	1610.85	81	93	IPI00124824
Male	Kallikrein 1-related peptidase b24	IPI00124804	28909.2	1	3	4	13	6.6e-05	0.27	NSQPWHVAVFR	K	Y	0.95	3.81	0.418	5.8	0	5	0	0	2	1340.69	34	44	IPI00124822
Male	Kallikrein 1-related peptidase b24	IPI00124804	28909.2	1	3	4	13	6.6e-05	0.27	PADITDAVKPIDLPTEEPK	E	L	0.95	5.42	0.351	0	0	1	1	0	1	2049.08	131	149
Male	Kallikrein 1-related peptidase b24	IPI00124804	28909.2	1	3	4	13	6.6e-05	0.27	SNDLMLLR	K	L	0.95	2.79	0.126	1.39	1	0	0	0	2	961.514	120	127	IPI00113575,IPI00124824
Male	Kallikrein 1-related peptidase b26	IPI00121821	28445.4	1	3	4	38	0.000193	0.433	EHICGGVLLDR	K	N	0.95	3.29	0.32	7.89	12	35	0	0	2	1268.64	47	57	IPI00121818,IPI00113575
Male	Kallikrein 1-related peptidase b26	IPI00121821	28445.4	1	3	4	38	0.000193	0.433	EPKPGSTCLASGWGSITPT	K	R	0.95	3.37	0.371	0	0	1	0	0	1	1945.93	145	163
Male	Kallikrein 1-related peptidase b26	IPI00121821	28445.4	1	3	4	38	0.000193	0.433	EPKPGSTCLASGWGSITPTR	K	W	0.95	3.25	0.572	3.96	0	1	0	0	2	2102.03	145	164
Male	Kallikrein 1-related peptidase b26	IPI00121821	28445.4	1	3	4	38	0.000193	0.433	LFQEEPSAQHR	K	L	0.95	3.76	0.288	5.92	9	38	0	0	2	1341.66	80	90	IPI00121818,IPI00130801
Male	Kallikrein 1-related peptidase b26	IPI00121821	28445.4	1	3	4	38	0.000193	0.433	LSKPADITDVVKPIALPTK	R	E	0.95	5.65	0.411	12.7	0	12	3	0	2	2006.19	126	144	IPI00121818,IPI00134580
Male	Kallikrein 1-related peptidase b26	IPI00121821	28445.4	1	3	4	38	0.000193	0.433	NSQPWQVAVYYQK	K	E	0.95	4.44	0.437	11.9	0	18	0	0	2	1610.8	34	46	IPI00121818
Male	Kallikrein 1-related peptidase b26	IPI00121821	28445.4	1	3	4	38	0.000193	0.433	NSQPWQVAVYYQKEHICGGVLLDR	K	N	0.95	0	0	4.39	0	3	0	0	2	2860.42	34	57	IPI00121818,IPI00136038
Male	Kallikrein 1-related peptidase b26	IPI00121821	28445.4	1	3	4	38	0.000193	0.433	NWVLTAAHCYVDQYEVWLGK	R	N	0.95	0	0	9.14	0	31	18	0	2	2452.18	58	77	IPI00121818,IPI00130801
Male	Kallikrein 1-related peptidase b26	IPI00121821	28445.4	1	3	4	38	0.000193	0.433	SDDLQCVFITLLPNENCAK	K	V	0.95	5.45	0.365	5.35	0	34	2	0	2	2237.06	168	186
Male	Kallikrein 1-related peptidase b27	IPI00124824	28725	1	6	7	19	9.08e-05	0.232	AKPNAPGVFTK	C	L	0.95	2.8	0.434	0	0	2	0	0	1	1129.64	237	247
Male	Kallikrein 1-related peptidase b27	IPI00124824	28725	1	6	7	19	9.08e-05	0.232	GSIPCAKPNAPGVFTK	W	L	0.95	3.34	0.371	0	0	1	0	0	1	1643.86	232	247
Male	Kallikrein 1-related peptidase b27	IPI00124824	28725	1	6	7	19	9.08e-05	0.232	KPNAPGVFTK	A	L	0.95	3.37	0.318	0	0	2	0	0	1	1058.6	238	247
Male	Kallikrein 1-related peptidase b27	IPI00124824	28725	1	6	7	19	9.08e-05	0.232	LSKPADITDAVKPIDLPTEEPK	R	L	0.95	5.68	0.383	8.42	0	7	4	0	2	2377.29	128	149	IPI00124822
Male	Kallikrein 1-related peptidase b27	IPI00124824	28725	1	6	7	19	9.08e-05	0.232	NDHIPHPEDK	L	S	0.947	2.89	0.105	0	0	1	0	0	1	1201.56	110	119
Male	Kallikrein 1-related peptidase b27	IPI00124824	28725	1	6	7	19	9.08e-05	0.232	YQIPNDLQCVFIK	K	L	0.95	0	0	4.24	0	2	0	0	2	1637.84	167	179
Male	Kallikrein 1-related peptidase b27	IPI00124824	28725	1	8	9	17	7.95e-05	0.335	AKPNAPGVFTK	C	L	0.95	2.58	0.363	0	0	2	0	0	1	1129.64	237	247
Male	Kallikrein 1-related peptidase b27	IPI00124824	28725	1	8	9	17	7.95e-05	0.335	GDSGGPLICDGVLHGITSWGSIPCAK	K	P	0.95	5.53	0.535	0	0	3	0	0	1	2654.27	213	238
Male	Kallikrein 1-related peptidase b27	IPI00124824	28725	1	8	9	17	7.95e-05	0.335	GDSGGPLICDGVLHGITSWGSIPCAKPNAPGVF	K	T	0.95	5.56	0.553	0	0	0	1	0	1	3336.62	213	245
Male	Kallikrein 1-related peptidase b27	IPI00124824	28725	1	8	9	17	7.95e-05	0.335	HGITSWGSIPCAK	L	P	0.95	4.22	0.418	0	0	1	0	0	0	1413.69	226	238
Male	Kallikrein 1-related peptidase b27	IPI00124824	28725	1	8	9	17	7.95e-05	0.335	LSKPADITDAVKPIDLPTEEPK	R	L	0.95	5.32	0.402	8.32	0	2	3	0	2	2377.29	128	149	IPI00124822
Male	Kallikrein 1-related peptidase b27	IPI00124824	28725	1	8	9	17	7.95e-05	0.335	NDHIPHPEDK	L	S	0.95	3.16	0.107	0	0	1	0	0	1	1201.56	110	119
Male	Kallikrein 1-related peptidase b27	IPI00124824	28725	1	8	9	17	7.95e-05	0.335	SNDLMLLR	K	L	0.95	3.44	0.194	2.92	0	2	0	0	2	961.514	120	127	IPI00113575,IPI00124804
Male	Kallikrein 1-related peptidase b27	IPI00124824	28725	1	8	9	17	7.95e-05	0.335	YQIPNDLQCVF	K	I	0.95	3	0.376	0	0	1	0	0	1	1396.66	167	177
Male	Kallikrein 1-related peptidase b27	IPI00124824	28725	1	8	9	17	7.95e-05	0.335	YQIPNDLQCVFIK	K	L	0.95	0	0	7.28	0	3	0	0	2	1637.84	167	179
Male	Kallikrein 1-related peptidase b27	IPI00124824	28725	1	9	11	65	0.00033	0.49	AKPNAPGVFTK	C	L	0.95	2.86	0.347	0	0	1	0	0	1	1129.64	237	247
Male	Kallikrein 1-related peptidase b27	IPI00124824	28725	1	9	11	65	0.00033	0.49	DHIPHPEDK	N	S	0.95	2.68	0.259	0	0	3	0	0	1	1087.52	111	119
Male	Kallikrein 1-related peptidase b27	IPI00124824	28725	1	9	11	65	0.00033	0.49	GDSGGPLICDGVLHGITSWGSIPCAK	K	P	0.95	4.6	0.528	0	0	1	0	0	1	2654.27	213	238
Male	Kallikrein 1-related peptidase b27	IPI00124824	28725	1	9	11	65	0.00033	0.49	KNSQPWHVAVLR	K	S	0.95	4.22	0.276	7.68	0	6	0	0	2	1434.8	33	44
Male	Kallikrein 1-related peptidase b27	IPI00124824	28725	1	9	11	65	0.00033	0.49	LGSTCLASGWGSITPTK	K	Y	0.95	0	0	9.68	0	3	0	0	2	1735.87	150	166	IPI00124822,IPI00134582,IPI00130801,IPI00124804
Male	Kallikrein 1-related peptidase b27	IPI00124824	28725	1	9	11	65	0.00033	0.49	LSKPADITDAVKPIDLPTEEPK	R	L	0.95	5.79	0.371	9.51	0	5	4	0	2	2377.29	128	149	IPI00124822
Male	Kallikrein 1-related peptidase b27	IPI00124824	28725	1	9	11	65	0.00033	0.49	NKLFQREPSAQHR	K	W	0.95	3.7	0.153	2.02	0	16	0	0	2	1610.85	81	93	IPI00124804
Male	Kallikrein 1-related peptidase b27	IPI00124824	28725	1	9	11	65	0.00033	0.49	NSQPWHVAVLR	K	S	0.95	3.69	0.323	6.68	2	18	0	0	2	1306.7	34	44
Male	Kallikrein 1-related peptidase b27	IPI00124824	28725	1	9	11	65	0.00033	0.49	SNDLMLLR	K	L	0.95	2.79	0.126	1.39	1	0	0	0	2	961.514	120	127	IPI00113575,IPI00124804
Male	Kallikrein 1-related peptidase b27	IPI00124824	28725	1	9	11	65	0.00033	0.49	YQIPNDLQCVFIK	K	L	0.95	0	0	9.89	0	6	0	0	2	1637.84	167	179
Male	Kallikrein 1-related peptidase b3	IPI00134582	28981.4	1	3	4	15	7.17e-05	0.245	DTCKGDSGGPLICDGVLQGITSW	K	G	0.95	6.78	0.257	0	0	3	0	0	1	2436.12	207	229	IPI00134580
Male	Kallikrein 1-related peptidase b3	IPI00134582	28981.4	1	3	4	15	7.17e-05	0.245	GDSGGPLICDGVLQGITSW	K	G	0.95	3.5	0.158	0	0	2	0	0	1	1931.92	211	229	IPI00134580
Male	Kallikrein 1-related peptidase b3	IPI00134582	28981.4	1	3	4	15	7.17e-05	0.245	KDEPSAQHR	F	F	0.95	2.9	0.192	0	0	2	0	0	1	1067.52	82	90	IPI00134580
Male	Kallikrein 1-related peptidase b3	IPI00134582	28981.4	1	3	4	15	7.17e-05	0.245	KLLPNEDCAK	L	A	0.95	3.32	0.287	0	0	3	0	0	1	1187.61	177	186
Male	Kallikrein 1-related peptidase b3	IPI00134582	28981.4	1	3	4	15	7.17e-05	0.245	LSKPADITDTVKPITLPTEEPK	R	L	0.95	5.94	0.444	5.47	0	4	7	0	2	2393.32	126	147
Male	Kallikrein 1-related peptidase b3	IPI00134582	28981.4	1	3	4	15	7.17e-05	0.245	PADITDTVKPITLPTEEPK	K	L	0.95	4.06	0.217	0	0	0	1	0	1	2065.11	129	147
Male	Kallikrein 1-related peptidase b3	IPI00134582	28981.4	1	3	4	20	9.35e-05	0.18	IVGGFK	R	C	0.95	1.85	0.124	0.886	1	0	0	0	2	620.377	25	30	IPI00136040,IPI00113575,IPI00134580
Male	Kallikrein 1-related peptidase b3	IPI00134582	28981.4	1	3	4	20	9.35e-05	0.18	KDEPSAQHR	F	F	0.95	2.96	0.208	0	0	2	0	0	1	1067.52	82	90	IPI00134580
Male	Kallikrein 1-related peptidase b3	IPI00134582	28981.4	1	3	4	20	9.35e-05	0.18	KLLPNEDCAK	L	A	0.95	3.29	0.253	0	0	2	0	0	1	1187.61	177	186
Male	Kallikrein 1-related peptidase b3	IPI00134582	28981.4	1	3	4	20	9.35e-05	0.18	LSKPADITDTVKPITLPTEEPK	R	L	0.95	4.36	0.341	5.85	0	0	3	0	2	2393.32	126	147
Male	Kallikrein 1-related peptidase b3	IPI00134582	28981.4	1	3	4	20	9.35e-05	0.18	PADITDTVKPITLPTEEPK	K	L	0.95	5.43	0.406	0	0	6	9	0	1	2065.11	129	147
Male	Kallikrein 1-related peptidase b3	IPI00134582	28981.4	1	3	5	28	0.000142	0.318	LGSTCLASGWGSITPTK	K	F	0.95	0	0	9.68	0	3	0	0	2	1735.87	148	164	IPI00124822,IPI00124824,IPI00130801,IPI00124804
Male	Kallikrein 1-related peptidase b3	IPI00134582	28981.4	1	3	5	28	0.000142	0.318	LSKPADITDTVKPITLPTEEPK	R	L	0.95	5.89	0.414	9.04	0	1	5	0	2	2393.32	126	147
Male	Kallikrein 1-related peptidase b3	IPI00134582	28981.4	1	3	5	28	0.000142	0.318	NSQPWHVAVYR	K	Y	0.95	3.87	0.404	8.46	38	78	0	0	2	1356.68	34	44	IPI00136040,IPI00136034,IPI00134580
Male	Kallikrein 1-related peptidase b3	IPI00134582	28981.4	1	3	5	28	0.000142	0.318	NWVLTAAHCYDDNYKVWLGK	P	N	0.95	4.42	0.393	0	0	17	1	0	1	2453.17	58	77
Male	Kallikrein 1-related peptidase b3	IPI00134582	28981.4	1	3	5	28	0.000142	0.318	YTQYLCGGVLLDPNWVLTAAHCYDDNYK	R	V	0.95	0	0	5.38	0	0	4	0	2	3349.53	45	72
Female	Kallikrein 1-related peptidase b5	IPI00136033	28730.5	1	4	7	42	0.000205	0.126	KPADITDVVKPIDLPTEEPK	K	L	0.95	6.31	0.528	9.55	0	9	7	0	2	2205.2	128	147	IPI00323869
Female	Kallikrein 1-related peptidase b5	IPI00136033	28730.5	1	4	7	42	0.000205	0.126	LKKPADITDVVKPIDLPTEEPK	R	L	0.95	0	0	8.8	0	2	15	0	2	2446.38	126	147	IPI00323869
Female	Kallikrein 1-related peptidase b5	IPI00136033	28730.5	1	4	7	42	0.000205	0.126	PADITDVVKPIDLPTEEPK	K	L	0.95	5.56	0.408	0	0	3	5	0	1	2077.11	129	147
Female	Kallikrein 1-related peptidase b5	IPI00136033	28730.5	1	4	7	42	0.000205	0.126	VLTAAHCHNDK	W	Y	0.95	3.55	0.297	0	0	1	0	0	1	1265.61	60	70
Female	Kallikrein 1-related peptidase b5	IPI00136033	28730.5	1	3	5	74	0.000361	0.126	KPADITDVVKPIDLPTEEPK	K	L	0.95	6.65	0.511	11.5	0	9	10	0	2	2205.2	128	147	IPI00323869
Female	Kallikrein 1-related peptidase b5	IPI00136033	28730.5	1	3	5	74	0.000361	0.126	LKKPADITDVVKPIDLPTEEPK	R	L	0.95	0	0	8.44	0	11	27	0	2	2446.38	126	147	IPI00323869
Female	Kallikrein 1-related peptidase b5	IPI00136033	28730.5	1	3	5	74	0.000361	0.126	VLTAAHCHNDK	W	Y	0.95	4.31	0.368	0	0	17	0	0	1	1265.61	60	70
Female	Kallikrein 1-related peptidase b5	IPI00136033	28730.5	1	6	9	51	0.000315	0.199	KPADITDVVKPIDLPTEEPK	K	L	0.95	6.47	0.489	9.57	0	12	10	0	2	2205.2	128	147	IPI00323869
Female	Kallikrein 1-related peptidase b5	IPI00136033	28730.5	1	6	9	51	0.000315	0.199	LKKPADITDVVKPIDLPTEEPK	R	L	0.95	0	0	9	0	5	8	0	2	2446.38	126	147	IPI00323869
Female	Kallikrein 1-related peptidase b5	IPI00136033	28730.5	1	6	9	51	0.000315	0.199	NSQPWQVAVYR	K	F	0.95	3.86	0.372	7.52	1	1	0	0	2	1347.68	34	44	IPI00323869
Female	Kallikrein 1-related peptidase b5	IPI00136033	28730.5	1	6	9	51	0.000315	0.199	PADITDVVKPIDLPTEEPK	K	L	0.95	3.6	0.256	0	0	1	0	0	1	2077.11	129	147
Female	Kallikrein 1-related peptidase b5	IPI00136033	28730.5	1	6	9	51	0.000315	0.199	WVLTAAHCHNDK	N	Y	0.95	4.33	0.408	0	0	12	0	0	1	1451.69	59	70
Female	Kallikrein 1-related peptidase b5	IPI00136033	28730.5	1	6	9	51	0.000315	0.199	YQVWLGK	K	N	0.95	2.29	0.114	2.29	1	0	0	0	2	893.489	71	77	IPI00323869,IPI00316234
Male	Kallikrein 1-related peptidase b5	IPI00136033	28730.5	1	6	8	23	0.00011	0.215	KLLPNEDCVK	F	A	0.95	3.34	0.321	0	0	2	0	0	1	1215.64	177	186
Male	Kallikrein 1-related peptidase b5	IPI00136033	28730.5	1	6	8	23	0.00011	0.215	KPADITDVVKPIDLPTEEPK	K	L	0.95	6.39	0.504	12.7	0	5	6	0	2	2205.2	128	147	IPI00323869
Male	Kallikrein 1-related peptidase b5	IPI00136033	28730.5	1	6	8	23	0.00011	0.215	LKKPADITDVVKPIDLPTEEPK	R	L	0.95	0	0	7.23	0	1	3	0	2	2446.38	126	147	IPI00323869
Male	Kallikrein 1-related peptidase b5	IPI00136033	28730.5	1	6	8	23	0.00011	0.215	NNFFEDEPSAQHR	K	L	0.95	4.8	0.416	8.34	0	3	0	0	2	1590.69	78	90
Male	Kallikrein 1-related peptidase b5	IPI00136033	28730.5	1	6	8	23	0.00011	0.215	PADITDVVKPIDLPTEEPK	K	L	0.95	3.02	0.314	0	0	1	0	0	1	2077.11	129	147
Male	Kallikrein 1-related peptidase b5	IPI00136033	28730.5	1	6	8	23	0.00011	0.215	VLTAAHCHNDK	W	Y	0.95	4.08	0.412	0	0	2	0	0	1	1265.61	60	70
Male	Kallikrein 1-related peptidase b5	IPI00136033	28730.5	1	6	9	17	7.95e-05	0.18	KLLPNEDCVK	F	A	0.95	3.35	0.293	0	0	1	0	0	1	1215.64	177	186
Male	Kallikrein 1-related peptidase b5	IPI00136033	28730.5	1	6	9	17	7.95e-05	0.18	KPADITDVVKPIDLPTEEPK	K	L	0.95	6.54	0.537	8.31	0	3	3	0	2	2205.2	128	147	IPI00323869
Male	Kallikrein 1-related peptidase b5	IPI00136033	28730.5	1	6	9	17	7.95e-05	0.18	LKKPADITDVVKPIDLPTEEPK	R	L	0.95	0	0	8.01	0	1	3	0	2	2446.38	126	147	IPI00323869
Male	Kallikrein 1-related peptidase b5	IPI00136033	28730.5	1	6	9	17	7.95e-05	0.18	NANWVLTAAHCHNDK	L	Y	0.95	5.04	0.454	0	0	1	0	0	1	1750.81	56	70
Male	Kallikrein 1-related peptidase b5	IPI00136033	28730.5	1	6	9	17	7.95e-05	0.18	PADITDVVKPIDLPTE	K	E	0.95	3.5	0.338	0	0	0	1	0	0	1722.92	129	144
Male	Kallikrein 1-related peptidase b5	IPI00136033	28730.5	1	6	9	17	7.95e-05	0.18	PADITDVVKPIDLPTEEPK	K	L	0.95	5.58	0.358	0	0	2	2	0	1	2077.11	129	147
Male	Kallikrein 1-related peptidase b5	IPI00136033	28730.5	1	8	10	69	0.00035	0.333	CDGVLHGITSWGPSPCGK	I	P	0.95	2.63	0.524	0	0	1	0	0	0	1927.88	219	236
Male	Kallikrein 1-related peptidase b5	IPI00136033	28730.5	1	8	10	69	0.00035	0.333	KPADITDVVKPIDLPTEEPK	K	L	0.95	6.33	0.517	12.3	0	10	10	0	2	2205.2	128	147	IPI00323869
Male	Kallikrein 1-related peptidase b5	IPI00136033	28730.5	1	8	10	69	0.00035	0.333	LKKPADITDVVKPIDLPTEEPK	R	L	0.95	0	0	8.32	0	5	10	0	2	2446.38	126	147	IPI00323869
Male	Kallikrein 1-related peptidase b5	IPI00136033	28730.5	1	8	10	69	0.00035	0.333	NANWVLTAAHCHNDK	L	Y	0.95	5.58	0.391	0	0	14	0	0	1	1750.81	56	70
Male	Kallikrein 1-related peptidase b5	IPI00136033	28730.5	1	8	10	69	0.00035	0.333	NNFFEDEPSAQHR	K	L	0.95	4.76	0.405	7.66	0	4	0	0	2	1590.69	78	90
Male	Kallikrein 1-related peptidase b5	IPI00136033	28730.5	1	8	10	69	0.00035	0.333	NSQPWQVAVYR	K	F	0.95	3.55	0.291	5.44	0	1	0	0	2	1347.68	34	44	IPI00323869
Male	Kallikrein 1-related peptidase b5	IPI00136033	28730.5	1	8	10	69	0.00035	0.333	WVLTAAHCHNDK	N	Y	0.95	4.36	0.432	0	0	12	0	0	1	1451.69	59	70
Male	Kallikrein 1-related peptidase b5	IPI00136033	28730.5	1	8	10	69	0.00035	0.333	YQCGGVLLNANWVLTAAHCHNDK	K	Y	0.95	0	0	3.89	0	0	2	0	2	2641.24	48	70
Male	Kallikrein 1-related peptidase b8	IPI00130801	28513.9	1	4	6	14	6.69e-05	0.192	EHICGGVLLER	K	N	0.95	3.46	0.357	4.72	0	1	0	0	2	1282.66	47	57
Male	Kallikrein 1-related peptidase b8	IPI00130801	28513.9	1	4	6	14	6.69e-05	0.192	KPITLPTK	V	E	0.948	2.79	0.0984	0	0	1	0	0	1	897.578	137	144
Male	Kallikrein 1-related peptidase b8	IPI00130801	28513.9	1	4	6	14	6.69e-05	0.192	LFQEEPSAQHR	K	L	0.95	3.7	0.263	4.41	6	12	0	0	2	1341.66	80	90	IPI00121821,IPI00121818
Male	Kallikrein 1-related peptidase b8	IPI00130801	28513.9	1	4	6	14	6.69e-05	0.192	LSKPADITDAVKPITLPTK	R	E	0.95	5.9	0.49	7.89	0	3	3	0	2	2008.17	126	144
Male	Kallikrein 1-related peptidase b8	IPI00130801	28513.9	1	4	6	14	6.69e-05	0.192	NCIENHNVK	K	V	0.95	2.85	0.155	1.51	3	3	0	0	2	1127.53	183	191
Male	Kallikrein 1-related peptidase b8	IPI00130801	28513.9	1	4	6	15	7.01e-05	0.276	LFQEEPSAQHR	K	L	0.95	3.67	0.254	5.28	3	13	0	0	2	1341.66	80	90	IPI00121821,IPI00121818
Male	Kallikrein 1-related peptidase b8	IPI00130801	28513.9	1	4	6	15	7.01e-05	0.276	LSKPADITDAVKPITLPTK	R	E	0.95	6.22	0.42	8.59	0	1	6	0	2	2008.17	126	144
Male	Kallikrein 1-related peptidase b8	IPI00130801	28513.9	1	4	6	15	7.01e-05	0.276	NCIENHNVK	K	V	0.95	2.75	0.189	2.06	3	2	0	0	2	1127.53	183	191
Male	Kallikrein 1-related peptidase b8	IPI00130801	28513.9	1	4	6	15	7.01e-05	0.276	NWVLTAAHCYVDQYEVWLGK	R	N	0.95	5.35	0.501	5.64	0	1	0	0	2	2452.18	58	77	IPI00121821,IPI00121818
Male	Kallikrein 1-related peptidase b8	IPI00130801	28513.9	1	4	6	15	7.01e-05	0.276	PADITDAVKPITLPTK	K	E	0.95	3.57	0.307	0	0	0	1	0	1	1679.96	129	144
Male	Kallikrein 1-related peptidase b8	IPI00130801	28513.9	1	4	6	15	7.01e-05	0.276	WQKPDDLQCVFL	K	K	0.95	3.62	0.297	0	0	3	0	0	1	1548.75	165	176	IPI00121818
Male	Kallikrein 1-related peptidase b8	IPI00130801	28513.9	1	4	6	15	7.01e-05	0.276	WQKPDDLQCVFLK	K	L	0.95	4.01	0.329	2.77	0	0	2	0	2	1676.85	165	177
Male	Kallikrein 1-related peptidase b8	IPI00130801	28513.9	1	6	7	39	0.000198	0.433	EHICGGVLLER	K	N	0.95	3.22	0.345	5.64	0	3	0	0	2	1282.66	47	57
Male	Kallikrein 1-related peptidase b8	IPI00130801	28513.9	1	6	7	39	0.000198	0.433	LFQEEPSAQHR	K	L	0.95	3.76	0.288	5.92	9	38	0	0	2	1341.66	80	90	IPI00121821,IPI00121818
Male	Kallikrein 1-related peptidase b8	IPI00130801	28513.9	1	6	7	39	0.000198	0.433	LGSTCLASGWGSITPTK	K	W	0.95	0	0	9.68	0	3	0	0	2	1735.87	148	164	IPI00124822,IPI00124824,IPI00134582,IPI00124804
Male	Kallikrein 1-related peptidase b8	IPI00130801	28513.9	1	6	7	39	0.000198	0.433	LSKPADITDAVKPITLPTK	R	E	0.95	5.71	0.475	7.51	0	2	3	0	2	2008.17	126	144
Male	Kallikrein 1-related peptidase b8	IPI00130801	28513.9	1	6	7	39	0.000198	0.433	NCIENHNVK	K	V	0.95	0	0	3.85	0	22	0	0	2	1127.53	183	191
Male	Kallikrein 1-related peptidase b8	IPI00130801	28513.9	1	6	7	39	0.000198	0.433	NSQPWQVAVYDNKE	K	H	0.95	3.7	0.232	0	0	2	0	0	1	1677.79	34	47
Male	Kallikrein 1-related peptidase b8	IPI00130801	28513.9	1	6	7	39	0.000198	0.433	NWVLTAAHCYVDQYEVWLGK	R	N	0.95	0	0	9.14	0	31	18	0	2	2452.18	58	77	IPI00121821,IPI00121818
Male	Kallikrein 1-related peptidase b8	IPI00130801	28513.9	1	6	7	39	0.000198	0.433	PADITDAVKPITLPTK	K	E	0.95	3.45	0.23	0	0	2	0	0	1	1679.96	129	144
Male	Kallikrein 1-related peptidase b8	IPI00130801	28513.9	1	6	7	39	0.000198	0.433	WQKPDDLQCVFLK	K	L	0.95	0	0	8.15	0	5	0	0	2	1676.85	165	177
Female	Kallikrein 1-related peptidase b9	IPI00136040	28882.9	0.998	2	2	9	5.56e-05	0.092	NNLYEEEPSAQHR	K	L	0.95	0	0	7.31	0	6	0	0	2	1586.72	78	90
Female	Kallikrein 1-related peptidase b9	IPI00136040	28882.9	0.998	2	2	9	5.56e-05	0.092	NSQPWHVAVYR	K	Y	0.95	2.61	0.278	7.19	0	3	0	0	2	1356.68	34	44	IPI00136034,IPI00134582,IPI00134580
Male	Kallikrein 1-related peptidase b9	IPI00136040	28882.9	1	6	8	64	0.000306	0.253	CAGETDGGKDTCK	L	G	0.95	4.58	0.424	0	0	3	0	0	1	1398.56	198	210
Male	Kallikrein 1-related peptidase b9	IPI00136040	28882.9	1	6	8	64	0.000306	0.253	DLQCVNLK	K	L	0.95	2.6	0.115	2.28	3	1	0	0	2	989.509	170	177	IPI00112184,IPI00134580
Male	Kallikrein 1-related peptidase b9	IPI00136040	28882.9	1	6	8	64	0.000306	0.253	KLLPNEDCGK	L	A	0.95	3.11	0.0888	0	0	1	0	0	1	1173.59	177	186
Male	Kallikrein 1-related peptidase b9	IPI00136040	28882.9	1	6	8	64	0.000306	0.253	LCAGETDGGKDTCK	M	G	0.95	4.69	0.459	0	0	3	0	0	1	1511.65	197	210
Male	Kallikrein 1-related peptidase b9	IPI00136040	28882.9	1	6	8	64	0.000306	0.253	LSKPADITDVVKPIALPTEEPK	R	L	0.95	4.11	0.359	11	0	16	21	0	2	2361.33	126	147	IPI00134580
Male	Kallikrein 1-related peptidase b9	IPI00136040	28882.9	1	6	8	64	0.000306	0.253	NNLYEEEPSAQHR	K	L	0.95	4.52	0.375	8.19	0	16	0	0	2	1586.72	78	90
Male	Kallikrein 1-related peptidase b9	IPI00136040	28882.9	1	10	13	50	0.000234	0.375	AGETDGGKDTCK	C	G	0.95	2.98	0.237	0	0	1	0	0	1	1238.53	199	210
Male	Kallikrein 1-related peptidase b9	IPI00136040	28882.9	1	10	13	50	0.000234	0.375	CAGETDGGKDTCK	L	G	0.95	4.61	0.448	0	0	2	0	0	1	1398.56	198	210
Male	Kallikrein 1-related peptidase b9	IPI00136040	28882.9	1	10	13	50	0.000234	0.375	DLQCVNLK	K	L	0.95	2.36	0.0965	2.05	3	1	0	0	2	989.509	170	177	IPI00112184,IPI00134580
Male	Kallikrein 1-related peptidase b9	IPI00136040	28882.9	1	10	13	50	0.000234	0.375	GDSGGPLICDGVLQGITSWGFTPCGEPK	K	K	0.95	0	0	14.4	0	4	7	0	2	2905.35	211	238
Male	Kallikrein 1-related peptidase b9	IPI00136040	28882.9	1	10	13	50	0.000234	0.375	ICDGVLQGITSWGFTPCGEPK	L	K	0.95	6.28	0.54	0	0	0	2	0	1	2322.09	218	238
Male	Kallikrein 1-related peptidase b9	IPI00136040	28882.9	1	10	13	50	0.000234	0.375	IVGGFK	R	C	0.95	1.85	0.124	0.886	1	0	0	0	2	620.377	25	30	IPI00113575,IPI00134582,IPI00134580
Male	Kallikrein 1-related peptidase b9	IPI00136040	28882.9	1	10	13	50	0.000234	0.375	KPGVYTK	K	L	0.95	2.04	0.0948	1.39	2	0	0	0	2	792.462	239	245	IPI00134580
Male	Kallikrein 1-related peptidase b9	IPI00136040	28882.9	1	10	13	50	0.000234	0.375	LCAGETDGGKDTCK	M	G	0.95	4.52	0.409	0	0	1	0	0	1	1511.65	197	210
Male	Kallikrein 1-related peptidase b9	IPI00136040	28882.9	1	10	13	50	0.000234	0.375	LSKPADITDVVKPIALPTEEPK	R	L	0.95	3.87	0.354	9.72	0	6	10	0	2	2361.33	126	147	IPI00134580
Male	Kallikrein 1-related peptidase b9	IPI00136040	28882.9	1	10	13	50	0.000234	0.375	NNLYEEEPSAQHR	K	L	0.95	4.67	0.376	8.74	0	10	0	0	2	1586.72	78	90
Male	Kallikrein 1-related peptidase b9	IPI00136040	28882.9	1	15	19	367	0.00186	0.617	CAGETDGGKDTCK	L	G	0.95	3.59	0.424	0	0	3	0	0	1	1398.56	198	210
Male	Kallikrein 1-related peptidase b9	IPI00136040	28882.9	1	15	19	367	0.00186	0.617	DANWVLTAAHCYYEENK	L	V	0.95	5.36	0.411	0	0	1	0	0	1	2083.92	56	72
Male	Kallikrein 1-related peptidase b9	IPI00136040	28882.9	1	15	19	367	0.00186	0.617	DLQCVNLK	K	L	0.95	2.61	0.12	2.74	8	0	0	0	2	989.509	170	177	IPI00112184,IPI00134580
Male	Kallikrein 1-related peptidase b9	IPI00136040	28882.9	1	15	19	367	0.00186	0.617	DTCKGDSGGPLICDGVLQGITSWGFTPCGEPK	K	K	0.95	0	0	8.7	0	0	3	0	2	3409.55	207	238
Male	Kallikrein 1-related peptidase b9	IPI00136040	28882.9	1	15	19	367	0.00186	0.617	GDSGGPLICDGVLQGITSWGFTPCGEPK	K	K	0.95	0	0	13.3	0	18	11	0	2	2905.35	211	238
Male	Kallikrein 1-related peptidase b9	IPI00136040	28882.9	1	15	19	367	0.00186	0.617	HPEYDYSNDLMLLR	R	L	0.95	3.72	0.274	7.19	0	14	0	0	2	1765.82	112	125
Male	Kallikrein 1-related peptidase b9	IPI00136040	28882.9	1	15	19	367	0.00186	0.617	ICGGVLLDANWVLTAAHCYYEENK	Y	V	0.95	5.79	0.456	0	0	5	5	0	1	2796.31	49	72
Male	Kallikrein 1-related peptidase b9	IPI00136040	28882.9	1	15	19	367	0.00186	0.617	KPGVYTK	K	L	0.95	2.44	0.311	2.43	27	0	0	0	2	792.462	239	245	IPI00134580
Male	Kallikrein 1-related peptidase b9	IPI00136040	28882.9	1	15	19	367	0.00186	0.617	LCAGETDGGKDTCK	M	G	0.95	4.15	0.493	0	0	6	0	0	1	1511.65	197	210
Male	Kallikrein 1-related peptidase b9	IPI00136040	28882.9	1	15	19	367	0.00186	0.617	LGSTCLASGWGSTTPF	K	K	0.95	3.56	0.25	0	0	1	0	0	1	1641.76	148	163
Male	Kallikrein 1-related peptidase b9	IPI00136040	28882.9	1	15	19	367	0.00186	0.617	LSKPADITDVVKPIALPTEEPK	R	L	0.95	5.87	0.491	10.6	0	15	20	0	2	2361.33	126	147	IPI00134580
Male	Kallikrein 1-related peptidase b9	IPI00136040	28882.9	1	15	19	367	0.00186	0.617	LYEEEPSAQHR	N	L	0.95	3.31	0.164	0	0	1	0	0	1	1358.63	80	90
Male	Kallikrein 1-related peptidase b9	IPI00136040	28882.9	1	15	19	367	0.00186	0.617	NNLYEEEPSAQHR	K	L	0.95	0	0	6.24	0	107	0	0	2	1586.72	78	90
Male	Kallikrein 1-related peptidase b9	IPI00136040	28882.9	1	15	19	367	0.00186	0.617	NSQPWHVAVYR	K	Y	0.95	3.87	0.404	8.46	38	78	0	0	2	1356.68	34	44	IPI00136034,IPI00134582,IPI00134580
Male	Kallikrein 1-related peptidase b9	IPI00136040	28882.9	1	15	19	367	0.00186	0.617	YNEYICGGVLLDANWVLTAAHCYYEENK	R	V	0.95	0	0	7.16	0	0	6	0	2	3365.52	45	72
Male	Kallikrein 1-related peptidase-like b4	IPI00316234	28530.8	1	6	9	24	0.000115	0.227	KYPDDLQCVNLK	F	L	0.95	4.82	0.235	0	0	2	1	0	1	1492.75	161	172
Male	Kallikrein 1-related peptidase-like b4	IPI00316234	28530.8	1	6	9	24	0.000115	0.227	KYQCGGVLLDR	N	N	0.95	3.61	0.339	0	0	3	0	0	1	1308.67	42	52
Male	Kallikrein 1-related peptidase-like b4	IPI00316234	28530.8	1	6	9	24	0.000115	0.227	LSKPADITDVVKPITLPTEEPK	R	L	0.95	5.95	0.241	8.64	0	3	8	0	2	2391.34	121	142
Male	Kallikrein 1-related peptidase-like b4	IPI00316234	28530.8	1	6	9	24	0.000115	0.227	NNFLEDEPSDQHR	K	L	0.95	0	0	6.1	0	3	0	0	2	1600.7	73	85
Male	Kallikrein 1-related peptidase-like b4	IPI00316234	28530.8	1	6	9	24	0.000115	0.227	PADITDVVKPITLPTEEPK	K	L	0.95	4.75	0.392	0	0	1	2	0	1	2063.13	124	142
Male	Kallikrein 1-related peptidase-like b4	IPI00316234	28530.8	1	6	9	24	0.000115	0.227	YQCGGVLLDR	K	N	0.95	3.33	0.314	4.18	0	1	0	0	2	1180.58	43	52
Male	Kallikrein 1-related peptidase-like b4	IPI00316234	28530.8	1	8	10	36	0.000168	0.227	KYPDDLQCVNLK	F	L	0.95	4.23	0.261	0	0	3	2	0	1	1492.75	161	172
Male	Kallikrein 1-related peptidase-like b4	IPI00316234	28530.8	1	8	10	36	0.000168	0.227	KYQCGGVLLDR	N	N	0.95	3.26	0.182	0	0	2	0	0	1	1308.67	42	52
Male	Kallikrein 1-related peptidase-like b4	IPI00316234	28530.8	1	8	10	36	0.000168	0.227	LEDEPSDQHR	F	L	0.95	3.27	0.267	0	0	1	0	0	1	1225.55	76	85
Male	Kallikrein 1-related peptidase-like b4	IPI00316234	28530.8	1	8	10	36	0.000168	0.227	LSKPADITDVVKPITLPTEEPK	R	L	0.95	3.98	0.389	7	0	0	4	0	2	2391.34	121	142
Male	Kallikrein 1-related peptidase-like b4	IPI00316234	28530.8	1	8	10	36	0.000168	0.227	NNFLEDEPSDQHR	K	L	0.95	4.57	0.362	7.44	0	1	0	0	2	1600.7	73	85
Male	Kallikrein 1-related peptidase-like b4	IPI00316234	28530.8	1	8	10	36	0.000168	0.227	PADITDVVKPITLPTEEPK	K	L	0.95	4.63	0.464	0	0	5	10	0	1	2063.13	124	142
Male	Kallikrein 1-related peptidase-like b4	IPI00316234	28530.8	1	8	10	36	0.000168	0.227	YPDDLQCVNLK	K	L	0.95	4.56	0.308	3.59	0	2	0	0	2	1364.65	162	172
Male	Kallikrein 1-related peptidase-like b4	IPI00316234	28530.8	1	8	10	36	0.000168	0.227	YQCGGVLLDR	K	N	0.95	3.42	0.329	3.51	0	6	0	0	2	1180.58	43	52
Male	Kallikrein 1-related peptidase-like b4	IPI00316234	28530.8	1	5	5	23	0.000117	0.277	KYPDDLQCVNLK	F	L	0.95	3.93	0.241	0	0	3	0	0	1	1492.75	161	172
Male	Kallikrein 1-related peptidase-like b4	IPI00316234	28530.8	1	5	5	23	0.000117	0.277	KYQCGGVLLDR	N	N	0.95	3.19	0.182	0	0	2	0	0	1	1308.67	42	52
Male	Kallikrein 1-related peptidase-like b4	IPI00316234	28530.8	1	5	5	23	0.000117	0.277	LSKPADITDVVKPITLPTEEPK	R	L	0.95	3.75	0.0199	3.92	0	0	1	0	2	2391.34	121	142
Male	Kallikrein 1-related peptidase-like b4	IPI00316234	28530.8	1	5	5	23	0.000117	0.277	NNFLEDEPSDQHR	K	L	0.95	4.6	0.397	7.96	0	10	0	0	2	1600.7	73	85
Male	Kallikrein 1-related peptidase-like b4	IPI00316234	28530.8	1	5	5	23	0.000117	0.277	NWVLTAAHCYNDK	R	Y	0.95	0	0	10.3	0	7	0	0	2	1591.73	53	65
Female	Kallikrein-1	IPI00323869	28757.3	1	3	3	22	0.000107	0.226	ASGWGSITPVK	L	Y	0.95	3.57	0.369	0	0	2	0	0	1	1102.59	154	164
Female	Kallikrein-1	IPI00323869	28757.3	1	3	3	22	0.000107	0.226	KPADITDVVKPIDLPTEEPK	K	L	0.95	6.21	0.501	10.2	0	9	7	0	2	2205.2	128	147	IPI00136033
Female	Kallikrein-1	IPI00323869	28757.3	1	3	3	22	0.000107	0.226	LKKPADITDVVKPIDLPTEEPK	R	L	0.95	0	0	8.8	0	2	15	0	2	2446.38	126	147	IPI00136033
Female	Kallikrein-1	IPI00323869	28757.3	1	3	3	22	0.000107	0.226	NNFLEDEPSAQHR	K	L	0.95	4.82	0.358	8.52	0	13	0	0	2	1556.71	78	90
Female	Kallikrein-1	IPI00323869	28757.3	1	3	3	22	0.000107	0.226	YEYPDELQCVNLK	K	L	0.95	0	0	7.72	0	7	0	0	2	1670.77	165	177
Female	Kallikrein-1	IPI00323869	28757.3	0.998	2	2	23	0.000112	0.184	KPADITDVVKPIDLPTEEPK	K	L	0.95	6.65	0.511	11.5	0	9	10	0	2	2205.2	128	147	IPI00136033
Female	Kallikrein-1	IPI00323869	28757.3	0.998	2	2	23	0.000112	0.184	LKKPADITDVVKPIDLPTEEPK	R	L	0.95	0	0	8.44	0	11	27	0	2	2446.38	126	147	IPI00136033
Female	Kallikrein-1	IPI00323869	28757.3	0.998	2	2	23	0.000112	0.184	NNFLEDEPSAQHR	K	L	0.95	4.96	0.339	7.74	0	11	0	0	2	1556.71	78	90
Female	Kallikrein-1	IPI00323869	28757.3	0.998	2	2	23	0.000112	0.184	YEYPDELQCVNLK	K	L	0.95	0	0	8.44	0	12	0	0	2	1670.77	165	177
Female	Kallikrein-1	IPI00323869	28757.3	1	6	6	32	0.000198	0.483	GKPNVPGIYTR	C	V	0.95	2.69	0.238	0	0	5	0	0	1	1201.67	235	245
Female	Kallikrein-1	IPI00323869	28757.3	1	6	6	32	0.000198	0.483	KPADITDVVKPIDLPTEEPK	K	L	0.95	6.07	0.469	11.8	0	12	10	0	2	2205.2	128	147	IPI00136033
Female	Kallikrein-1	IPI00323869	28757.3	1	6	6	32	0.000198	0.483	LGSTCLASGWGSITPVK	K	Y	0.95	0	0	5.22	0	1	0	0	2	1733.89	148	164
Female	Kallikrein-1	IPI00323869	28757.3	1	6	6	32	0.000198	0.483	LKKPADITDVVKPIDLPTEEPK	R	L	0.95	0	0	9	0	5	8	0	2	2446.38	126	147	IPI00136033
Female	Kallikrein-1	IPI00323869	28757.3	1	6	6	32	0.000198	0.483	NNFLEDEPSAQHR	K	L	0.95	4.88	0.367	8.66	0	16	0	0	2	1556.71	78	90
Female	Kallikrein-1	IPI00323869	28757.3	1	6	6	32	0.000198	0.483	NSQPWQVAVYR	K	F	0.95	3.86	0.372	7.52	1	1	0	0	2	1347.68	34	44	IPI00136033
Female	Kallikrein-1	IPI00323869	28757.3	1	6	6	32	0.000198	0.483	VLNFNTWIR	R	E	0.95	2.99	0.0904	1.92	0	1	0	0	2	1162.64	246	254
Female	Kallikrein-1	IPI00323869	28757.3	1	6	6	32	0.000198	0.483	YEYPDELQCVNLK	K	L	0.95	4.52	0.466	8.38	0	3	0	0	2	1670.77	165	177
Female	Kallikrein-1	IPI00323869	28757.3	1	6	6	32	0.000198	0.483	YQCGGILLNANWVLTAAHCHNDK	K	Y	0.95	3.08	0.351	3.08	0	0	6	0	2	2655.26	48	70
Female	Kallikrein-1	IPI00323869	28757.3	1	6	6	32	0.000198	0.483	YQVWLGK	K	N	0.95	2.29	0.114	2.29	1	0	0	0	2	893.489	71	77	IPI00136033,IPI00316234
Male	Kallikrein-1	IPI00323869	28757.3	0.998	2	2	7	3.34e-05	0.184	KPADITDVVKPIDLPTEEPK	K	L	0.95	6.39	0.504	12.7	0	5	6	0	2	2205.2	128	147	IPI00136033
Male	Kallikrein-1	IPI00323869	28757.3	0.998	2	2	7	3.34e-05	0.184	LKKPADITDVVKPIDLPTEEPK	R	L	0.95	0	0	7.23	0	1	3	0	2	2446.38	126	147	IPI00136033
Male	Kallikrein-1	IPI00323869	28757.3	0.998	2	2	7	3.34e-05	0.184	NNFLEDEPSAQHR	K	L	0.95	4.88	0.333	7.8	0	5	0	0	2	1556.71	78	90
Male	Kallikrein-1	IPI00323869	28757.3	0.998	2	2	7	3.34e-05	0.184	YEYPDELQCVNLK	K	L	0.95	0	0	8.82	0	2	0	0	2	1670.77	165	177
Male	Kallikrein-1	IPI00323869	28757.3	1	2	2	12	5.61e-05	0.184	KPADITDVVKPIDLPTEEPK	K	L	0.95	6.29	0.514	10.7	0	3	3	0	2	2205.2	128	147	IPI00136033
Male	Kallikrein-1	IPI00323869	28757.3	1	2	2	12	5.61e-05	0.184	LKKPADITDVVKPIDLPTEEPK	R	L	0.95	0	0	8.01	0	1	3	0	2	2446.38	126	147	IPI00136033
Male	Kallikrein-1	IPI00323869	28757.3	1	2	2	12	5.61e-05	0.184	NNFLEDEPSAQHR	K	L	0.95	4.52	0.344	9.14	0	5	0	0	2	1556.71	78	90
Male	Kallikrein-1	IPI00323869	28757.3	1	2	2	12	5.61e-05	0.184	YEYPDELQCVNLK	K	L	0.95	4.69	0.504	9.7	0	7	0	0	2	1670.77	165	177
Male	Kallikrein-1	IPI00323869	28757.3	1	3	3	19	9.64e-05	0.303	GKPNVPGIYTR	C	V	0.95	2.63	0.238	0	0	1	0	0	1	1201.67	235	245
Male	Kallikrein-1	IPI00323869	28757.3	1	3	3	19	9.64e-05	0.303	IVGGFNCEK	R	N	0.95	2.6	0.0928	2.37	1	0	0	0	2	1023.49	25	33	IPI00124822,IPI00136034
Male	Kallikrein-1	IPI00323869	28757.3	1	3	3	19	9.64e-05	0.303	KPADITDVVKPIDLPTEEPK	K	L	0.95	6.75	0.514	12.7	0	10	10	0	2	2205.2	128	147	IPI00136033
Male	Kallikrein-1	IPI00323869	28757.3	1	3	3	19	9.64e-05	0.303	LKKPADITDVVKPIDLPTEEPK	R	L	0.95	0	0	8.32	0	5	10	0	2	2446.38	126	147	IPI00136033
Male	Kallikrein-1	IPI00323869	28757.3	1	3	3	19	9.64e-05	0.303	NNFLEDEPSAQHR	K	L	0.95	4.84	0.345	7.42	0	16	0	0	2	1556.71	78	90
Male	Kallikrein-1	IPI00323869	28757.3	1	3	3	19	9.64e-05	0.303	NSQPWQVAVYR	K	F	0.95	3.55	0.291	5.44	0	1	0	0	2	1347.68	34	44	IPI00136033
Male	Kallikrein-1	IPI00323869	28757.3	1	3	3	19	9.64e-05	0.303	YEYPDELQCVNLK	K	L	0.95	4.3	0.534	9.96	0	2	0	0	2	1670.77	165	177
Female	Keratin intermediate filament 16a	IPI00131209	52036.1	0.998	2	2	8	3.91e-05	0.0781	FDGFGGGFGAGLGGGLGGGIGDGLLVGSEK	R	V	0.95	0	0	3.25	0	0	1	0	2	2625.3	85	114
Female	Keratin intermediate filament 16a	IPI00131209	52036.1	0.998	2	2	8	3.91e-05	0.0781	KTIEDLK	F	S	0.95	3.27	0.13	0	0	7	0	0	1	846.494	165	171
Male	Keratin, type II cytoskeletal 5	IPI00139301	61750	1	2	2	2	9.55e-06	0.0379	LRSEIDNVKK	R	Q	0.95	2.64	0.143	1.8	0	1	0	0	2	1201.69	390	399
Male	Keratin, type II cytoskeletal 5	IPI00139301	61750	1	2	2	2	9.55e-06	0.0379	SLDLDSIIAEVK	R	A	0.95	4.02	0.291	8.4	0	1	0	0	2	1302.72	326	337
Female	lactoperoxidase	IPI00133770	80108.1	1	9	10	25	0.000122	0.146	ASDDPTAETDIIHDTVEEVK	S	V	0.95	6.87	0.516	0	0	2	0	0	1	2185.02	23	42
Female	lactoperoxidase	IPI00133770	80108.1	1	9	10	25	0.000122	0.146	FGHLEIPSTVY	R	R	0.95	3.31	0.316	0	0	3	0	0	1	1262.64	464	474
Female	lactoperoxidase	IPI00133770	80108.1	1	9	10	25	0.000122	0.146	HLSDYLK	R	H	0.95	3.31	0.126	2.09	0	2	0	0	2	875.463	69	75
Female	lactoperoxidase	IPI00133770	80108.1	1	9	10	25	0.000122	0.146	KNPALGSANR	R	A	0.95	3.05	0.292	1.36	1	7	0	0	2	1027.56	147	156
Female	lactoperoxidase	IPI00133770	80108.1	1	9	10	25	0.000122	0.146	LDENYQPWGSESELPLHTVF	R	F	0.95	4.49	0.406	0	0	4	0	0	1	2361.1	476	495
Female	lactoperoxidase	IPI00133770	80108.1	1	9	10	25	0.000122	0.146	LFQPNHTIHGF	K	D	0.95	2.75	0.187	0	0	1	0	0	1	1310.66	536	546
Female	lactoperoxidase	IPI00133770	80108.1	1	9	10	25	0.000122	0.146	RDYLPILLGDEMQK	F	W	0.95	5.62	0.427	0	0	3	0	0	1	1690.88	425	438
Female	lactoperoxidase	IPI00133770	80108.1	1	9	10	25	0.000122	0.146	SDDPTAETDIIHDTVEEVK	A	V	0.95	5.61	0.442	0	0	1	0	0	1	2113.98	24	42
Female	lactoperoxidase	IPI00133770	80108.1	1	9	10	25	0.000122	0.146	SGQVWEESLKK	R	L	0.95	3.7	0.231	3.82	0	1	0	0	2	1290.67	87	97
Female	lactoperoxidase	IPI00133770	80108.1	1	5	5	18	8.79e-05	0.0873	FGHLEIPSTVY	R	R	0.95	2.72	0.245	0	0	2	0	0	1	1262.64	464	474
Female	lactoperoxidase	IPI00133770	80108.1	1	5	5	18	8.79e-05	0.0873	HLSDYLK	R	H	0.95	3.42	0.113	2.66	0	6	0	0	2	875.463	69	75
Female	lactoperoxidase	IPI00133770	80108.1	1	5	5	18	8.79e-05	0.0873	KNPALGSANR	R	A	0.95	3.22	0.291	0	0	5	0	0	2	1027.56	147	156
Female	lactoperoxidase	IPI00133770	80108.1	1	5	5	18	8.79e-05	0.0873	LDENYQPWGSESELPLHTVF	R	F	0.95	4.9	0.446	0	0	3	0	0	1	2361.1	476	495
Female	lactoperoxidase	IPI00133770	80108.1	1	5	5	18	8.79e-05	0.0873	RDYLPILLGDEMQK	F	W	0.95	4.75	0.37	0	0	2	0	0	1	1690.88	425	438
Female	lactoperoxidase	IPI00133770	80108.1	1	11	11	42	0.00026	0.192	AYPHGFVDCSSIDK	N	L	0.95	4.04	0.449	0	0	2	0	0	1	1595.72	686	699
Female	lactoperoxidase	IPI00133770	80108.1	1	11	11	42	0.00026	0.192	DHGQPGYNSWR	R	A	0.95	0	0	8.35	0	7	0	0	2	1316.58	558	568
Female	lactoperoxidase	IPI00133770	80108.1	1	11	11	42	0.00026	0.192	FGHLEIPSTVYR	R	L	0.95	3.35	0.26	4.06	0	2	0	0	2	1418.74	464	475
Female	lactoperoxidase	IPI00133770	80108.1	1	11	11	42	0.00026	0.192	FWWENPGVFTEK	R	Q	0.95	4.34	0.419	10.9	0	4	0	0	2	1539.73	643	654
Female	lactoperoxidase	IPI00133770	80108.1	1	11	11	42	0.00026	0.192	LDENYQPWGSESELPLHTVFF	R	N	0.95	4.15	0.193	0	0	1	0	0	1	2508.17	476	496
Female	lactoperoxidase	IPI00133770	80108.1	1	11	11	42	0.00026	0.192	LDENYQPWGSESELPLHTVFFNTWR	R	L	0.95	4.12	0.442	4.51	0	0	16	0	2	3065.44	476	500
Female	lactoperoxidase	IPI00133770	80108.1	1	11	11	42	0.00026	0.192	LMDLYGTPSNIDIWLGAVAEPLVHR	K	G	0.95	0	0	6.38	0	0	4	0	2	2796.44	595	619
Female	lactoperoxidase	IPI00133770	80108.1	1	11	11	42	0.00026	0.192	PWGSESELPLHTVFFNTWR	Q	L	0.95	6.99	0.548	0	0	1	0	0	1	2303.13	482	500
Female	lactoperoxidase	IPI00133770	80108.1	1	11	11	42	0.00026	0.192	SRDHGQPGYNSWR	R	A	0.95	4.39	0.35	0	0	2	0	0	2	1559.71	556	568
Female	lactoperoxidase	IPI00133770	80108.1	1	11	11	42	0.00026	0.192	VGPLLTCLLGQQFQR	R	I	0.95	0	0	8.06	0	1	0	0	2	1729.94	622	636
Female	lactoperoxidase	IPI00133770	80108.1	1	11	11	42	0.00026	0.192	WLPAEYEDGLSLPYGWTPGK	R	M	0.95	6.04	0.494	7.43	0	2	0	0	2	2279.1	161	180
Male	lactoperoxidase	IPI00133770	80108.1	1	7	7	16	7.64e-05	0.101	AYPHGFVDCSSIDK	N	L	0.95	3.36	0.301	0	0	1	0	0	1	1595.72	686	699
Male	lactoperoxidase	IPI00133770	80108.1	1	7	7	16	7.64e-05	0.101	DHGQPGYNSWR	R	A	0.95	3.24	0.295	3.44	0	1	0	0	2	1316.58	558	568
Male	lactoperoxidase	IPI00133770	80108.1	1	7	7	16	7.64e-05	0.101	FGHLEIPSTVY	R	R	0.95	2.71	0.315	0	0	2	0	0	1	1262.64	464	474
Male	lactoperoxidase	IPI00133770	80108.1	1	7	7	16	7.64e-05	0.101	KNPALGSANR	R	A	0.95	2.91	0.294	2.25	0	5	0	0	2	1027.56	147	156
Male	lactoperoxidase	IPI00133770	80108.1	1	7	7	16	7.64e-05	0.101	LNEEDVLDQK	Y	R	0.95	3.48	0.18	0	0	2	0	0	1	1202.59	201	210
Male	lactoperoxidase	IPI00133770	80108.1	1	7	7	16	7.64e-05	0.101	RDYLPILLGDEMQK	F	W	0.95	5.86	0.448	0	0	4	0	0	1	1690.88	425	438
Male	lactoperoxidase	IPI00133770	80108.1	1	7	7	16	7.64e-05	0.101	SRDHGQPGYNSWR	R	A	0.95	3.77	0.331	3.85	0	1	0	0	2	1559.71	556	568
Male	lactoperoxidase	IPI00133770	80108.1	1	7	8	28	0.000131	0.13	ASDDPTAETDIIHDTVEEVK	S	V	0.95	6.7	0.547	0	0	3	0	0	1	2185.02	23	42
Male	lactoperoxidase	IPI00133770	80108.1	1	7	8	28	0.000131	0.13	DHGQPGYNSWR	R	A	0.95	3.18	0.316	6.66	0	3	0	0	2	1316.58	558	568
Male	lactoperoxidase	IPI00133770	80108.1	1	7	8	28	0.000131	0.13	FGHLEIPSTVY	R	R	0.95	2.86	0.281	0	0	7	0	0	1	1262.64	464	474
Male	lactoperoxidase	IPI00133770	80108.1	1	7	8	28	0.000131	0.13	KNPALGSANR	R	A	0.95	3.18	0.314	2.8	3	3	0	0	2	1027.56	147	156
Male	lactoperoxidase	IPI00133770	80108.1	1	7	8	28	0.000131	0.13	LDENYQPWGSESELPLHTVF	R	F	0.95	4.78	0.444	0	0	6	0	0	1	2361.1	476	495
Male	lactoperoxidase	IPI00133770	80108.1	1	7	8	28	0.000131	0.13	LNEEDVLDQK	Y	R	0.95	3.8	0.237	0	0	2	0	0	1	1202.59	201	210
Male	lactoperoxidase	IPI00133770	80108.1	1	7	8	28	0.000131	0.13	SGQVWEESLK	R	K	0.95	3.35	0.284	3.77	0	1	0	0	2	1162.57	87	96
Male	lactoperoxidase	IPI00133770	80108.1	1	9	9	59	0.000299	0.183	DHGQPGYNSWR	R	A	0.95	0	0	7.89	0	9	0	0	2	1316.58	558	568
Male	lactoperoxidase	IPI00133770	80108.1	1	9	9	59	0.000299	0.183	FGHLEIPSTVYR	R	L	0.95	0	0	4.36	0	1	0	0	2	1418.74	464	475
Male	lactoperoxidase	IPI00133770	80108.1	1	9	9	59	0.000299	0.183	FWWENPGVFTEK	R	Q	0.95	4.23	0.378	6.24	0	4	0	0	2	1539.73	643	654
Male	lactoperoxidase	IPI00133770	80108.1	1	9	9	59	0.000299	0.183	KNPALGSANR	R	A	0.95	3.31	0.278	0	0	10	0	0	2	1027.56	147	156
Male	lactoperoxidase	IPI00133770	80108.1	1	9	9	59	0.000299	0.183	LDENYQPWGSESELPLHTVFFNTWR	R	L	0.95	4.53	0.34	4.34	0	0	11	0	2	3065.44	476	500
Male	lactoperoxidase	IPI00133770	80108.1	1	9	9	59	0.000299	0.183	LMDLYGTPSNIDIWLGAVAEPLVHR	K	G	0.95	4.77	0.518	4.13	0	0	19	0	2	2780.44	595	619
Male	lactoperoxidase	IPI00133770	80108.1	1	9	9	59	0.000299	0.183	PSNIDIWLGAVAEPLVHR	T	G	0.95	3.1	0.255	0	0	1	0	0	1	1987.08	602	619
Male	lactoperoxidase	IPI00133770	80108.1	1	9	9	59	0.000299	0.183	VGPLLTCLLGQQFQR	R	I	0.95	0	0	8.39	0	3	0	0	2	1729.94	622	636
Male	lactoperoxidase	IPI00133770	80108.1	1	9	9	59	0.000299	0.183	WLPAEYEDGLSLPYGWTPGK	R	M	0.95	5.9	0.509	6.06	0	1	0	0	2	2279.1	161	180
Male	Long palate, lung and nasal epithelium carcinoma-associated protein 1	IPI00117756	52439.1	0.999	2	2	3	1.43e-05	0.0464	DHDATAILQELPLLR	K	A	0.95	4.28	0.278	7	0	1	0	0	2	1704.93	46	60
Male	Long palate, lung and nasal epithelium carcinoma-associated protein 1	IPI00117756	52439.1	0.999	2	2	3	1.43e-05	0.0464	HLTQALK	K	D	0.95	2.19	0.131	1.7	2	0	0	0	2	810.484	39	45
Male	Long palate, lung and nasal epithelium carcinoma-associated protein 1	IPI00117756	52439.1	0.998	2	3	8	3.74e-05	0.0464	DHDATAILQELPLLR	K	A	0.95	5.69	0.416	9.8	0	3	3	0	2	1704.93	46	60
Male	Long palate, lung and nasal epithelium carcinoma-associated protein 1	IPI00117756	52439.1	0.998	2	3	8	3.74e-05	0.0464	HLTQALK	K	D	0.95	2.12	0.118	1.42	2	0	0	0	2	810.484	39	45
Male	Lysosomal alpha-mannosidase	IPI00381303	114588	1	2	3	6	2.81e-05	0.0257	NVHLLPHTHDDVGWLK	L	T	0.95	4	0.381	0	0	2	2	0	1	1880.98	64	79
Male	Lysosomal alpha-mannosidase	IPI00381303	114588	1	2	3	6	2.81e-05	0.0257	SHHVLVIENK	K	Y	0.95	3.47	0.259	3.96	0	2	0	0	2	1175.65	602	611
Male	Lysosomal alpha-mannosidase	IPI00381303	114588	1	3	3	6	3.05e-05	0.0355	AVLQHHDAVSGTAR	M	Q	0.95	3.13	0.361	0	0	1	0	0	1	1461.76	441	454
Male	Lysosomal alpha-mannosidase	IPI00381303	114588	1	3	3	6	3.05e-05	0.0355	SHHVLVIENK	K	Y	0.95	3.43	0.322	2.74	0	4	0	0	2	1175.65	602	611
Male	Lysosomal alpha-mannosidase	IPI00381303	114588	1	3	3	6	3.05e-05	0.0355	VAWHIDPFGHSR	R	E	0.95	3.47	0.299	5.62	0	1	0	0	2	1421.71	191	202
Female	Major urinary protein 5	IPI00115243	20988.6	1	4	4	5	2.43e-05	0.2	GREPDLSSDIK	F	E	0.95	3.54	0.278	0	0	1	0	0	1	1216.62	139	149
Female	Major urinary protein 5	IPI00115243	20988.6	1	4	4	5	2.43e-05	0.2	LCEEHGIVR	K	E	0.95	3.14	0.224	2.62	0	1	0	0	2	1112.55	155	163
Female	Major urinary protein 5	IPI00115243	20988.6	1	4	4	5	2.43e-05	0.2	VFVEHIDVLENSLAF	R	K	0.95	3.26	0.261	0	0	1	0	0	1	1731.9	58	72
Female	Major urinary protein 5	IPI00115243	20988.6	1	4	4	5	2.43e-05	0.2	VFVEHIDVLENSLAFK	R	F	0.95	5.49	0.433	4.77	0	2	0	0	2	1859.99	58	73
Male	Major urinary protein 5	IPI00115243	20988.6	1	3	3	11	5.26e-05	0.2	GREPDLSSDIK	F	E	0.95	3.41	0.376	0	0	3	0	0	1	1216.62	139	149
Male	Major urinary protein 5	IPI00115243	20988.6	1	3	3	11	5.26e-05	0.2	LCEEHGIVR	K	E	0.95	3.36	0.222	3.21	0	5	0	0	2	1112.55	155	163
Male	Major urinary protein 5	IPI00115243	20988.6	1	3	3	11	5.26e-05	0.2	VFVEHIDVLENSLAFK	R	F	0.95	4.99	0.347	5.01	0	0	3	0	2	1859.99	58	73
Male	Major urinary protein 5	IPI00115243	20988.6	1	4	5	49	0.000229	0.211	FHTVIDEECTEIY	K	L	0.95	3.47	0.352	0	0	1	0	0	1	1655.73	74	86
Male	Major urinary protein 5	IPI00115243	20988.6	1	4	5	49	0.000229	0.211	LCEEHGIVR	K	E	0.95	3.35	0.249	2.96	0	3	0	0	2	1112.55	155	163
Male	Major urinary protein 5	IPI00115243	20988.6	1	4	5	49	0.000229	0.211	VFVEHIDVLENSLAF	R	K	0.95	3.84	0.374	0	0	11	0	0	1	1731.9	58	72
Male	Major urinary protein 5	IPI00115243	20988.6	1	4	5	49	0.000229	0.211	VFVEHIDVLENSLAFK	R	F	0.95	5.53	0.407	4.62	0	20	14	0	2	1859.99	58	73
Male	Major urinary protein 5	IPI00115243	20988.6	1	3	3	8	4.06e-05	0.194	EKIEEHGTMR	R	V	0.95	2.84	0.264	3.12	0	3	0	0	2	1229.6	48	57
Male	Major urinary protein 5	IPI00115243	20988.6	1	3	3	8	4.06e-05	0.194	LCEEHGIVR	K	E	0.95	3.33	0.22	3.2	0	2	0	0	2	1112.55	155	163
Male	Major urinary protein 5	IPI00115243	20988.6	1	3	3	8	4.06e-05	0.194	VFVEHIDVLENSLAFK	R	F	0.95	5.48	0.464	9.59	0	3	0	0	2	1859.99	58	73
Male	Mannosyl-oligosaccharide 1,2-alpha-mannosidase IA	IPI00132493	73261.1	0.998	2	2	3	1.4e-05	0.0443	HLSHLSGDPVFAEK	M	V	0.95	4.49	0.353	0	0	0	1	0	1	1536.78	361	374
Male	Mannosyl-oligosaccharide 1,2-alpha-mannosidase IA	IPI00132493	73261.1	0.998	2	2	3	1.4e-05	0.0443	TWAWEAVEALESHCR	R	V	0.95	5.73	0.436	7.37	0	2	0	0	2	1844.84	568	582
Female	mucin 10	IPI00116916	33534.7	1	6	8	44	0.000214	0.0962	FFQQIFR	K	L	0.95	3.06	0.203	2.72	11	15	0	0	2	985.526	303	309
Female	mucin 10	IPI00116916	33534.7	1	6	8	44	0.000214	0.0962	KYLEDPR	R	Y	0.95	1.88	0.145	0.921	1	0	0	0	2	920.484	35	41
Female	mucin 10	IPI00116916	33534.7	1	6	8	44	0.000214	0.0962	YLEDPR	K	Y	0.95	0	0	3.41	2	0	0	0	2	792.389	36	41
Female	mucin 10	IPI00116916	33534.7	1	6	8	44	0.000214	0.0962	YPRPHYSY	R	G	0.95	2.58	0.407	0	0	11	0	0	1	1082.51	45	52
Female	mucin 10	IPI00116916	33534.7	1	6	8	44	0.000214	0.0962	YPRPHYSYGFIPSSPK	R	F	0.95	4.32	0.46	5.59	0	1	2	0	2	1895.94	45	60
Female	mucin 10	IPI00116916	33534.7	1	6	8	44	0.000214	0.0962	YSYGFIPSSPK	H	F	0.95	3.32	0.34	0	0	1	0	0	1	1245.62	50	60
Female	mucin 10	IPI00116916	33534.7	1	4	5	33	0.000161	0.0962	FFQQIFR	K	L	0.95	3.06	0.214	2.96	5	10	0	0	2	985.526	303	309
Female	mucin 10	IPI00116916	33534.7	1	4	5	33	0.000161	0.0962	KYLEDPR	R	Y	0.95	2.07	0.143	0.854	2	0	0	0	2	920.484	35	41
Female	mucin 10	IPI00116916	33534.7	1	4	5	33	0.000161	0.0962	YPRPHYSY	R	G	0.95	2.63	0.398	0	0	15	0	0	1	1082.51	45	52
Female	mucin 10	IPI00116916	33534.7	1	4	5	33	0.000161	0.0962	YPRPHYSYGFIPSSPK	R	F	0.95	3.79	0.205	0	0	0	1	0	2	1895.94	45	60
Female	mucin 10	IPI00116916	33534.7	1	9	11	195	0.0012	0.109	FFQQIFR	K	L	0.95	2.81	0.135	3.19	25	0	0	0	2	985.526	303	309
Female	mucin 10	IPI00116916	33534.7	1	9	11	195	0.0012	0.109	KYLEDPR	R	Y	0.95	2.15	0.111	2.74	2	0	0	0	2	920.484	35	41
Female	mucin 10	IPI00116916	33534.7	1	9	11	195	0.0012	0.109	PHYSYGFIPSSPK	R	F	0.95	4.01	0.446	0	2	83	0	0	1	1479.73	48	60
Female	mucin 10	IPI00116916	33534.7	1	9	11	195	0.0012	0.109	PHYSYGFIPSSPKFPKD	R	N	0.95	3.95	0.236	0	0	2	0	0	0	1966.97	48	64
Female	mucin 10	IPI00116916	33534.7	1	9	11	195	0.0012	0.109	RPHYSYGFIPSSPK	P	F	0.95	3.89	0.329	0	0	10	0	0	1	1635.83	47	60
Female	mucin 10	IPI00116916	33534.7	1	9	11	195	0.0012	0.109	YLEDPR	K	Y	0.95	0	0	3.7	2	0	0	0	2	792.389	36	41
Female	mucin 10	IPI00116916	33534.7	1	9	11	195	0.0012	0.109	YPRPHYSY	R	G	0.95	2.53	0.338	0	0	3	0	0	1	1082.51	45	52
Female	mucin 10	IPI00116916	33534.7	1	9	11	195	0.0012	0.109	YPRPHYSYGFIPSSPK	R	F	0.95	4.26	0.451	5.92	0	54	11	0	2	1895.94	45	60
Female	mucin 10	IPI00116916	33534.7	1	9	11	195	0.0012	0.109	YSYGFIPSSPK	H	F	0.95	3.27	0.367	0	0	1	0	0	1	1245.62	50	60
Male	mucin 10	IPI00116916	33534.7	1	3	3	9	4.3e-05	0.0705	SYGFIPSSPK	Y	F	0.95	2.58	0.263	0	0	4	0	0	1	1082.55	51	60
Male	mucin 10	IPI00116916	33534.7	1	3	3	9	4.3e-05	0.0705	YLEDPR	K	Y	0.95	0	0	3.31	3	0	0	0	2	792.389	36	41
Male	mucin 10	IPI00116916	33534.7	1	3	3	9	4.3e-05	0.0705	YPRPHYSY	R	G	0.95	2.76	0.328	0	0	2	0	0	1	1082.51	45	52
Male	mucin 10	IPI00116916	33534.7	1	3	4	8	3.74e-05	0.144	PTTNATTPAPTNRTTTNATTPAPTLKPTT	K	N	0.95	3.63	0.204	0	0	0	1	0	0	2938.51	139	167
Male	mucin 10	IPI00116916	33534.7	1	3	4	8	3.74e-05	0.144	SYGFIPSSPK	Y	F	0.95	2.81	0.296	0	1	5	0	0	1	1082.55	51	60
Male	mucin 10	IPI00116916	33534.7	1	3	4	8	3.74e-05	0.144	YLEDPR	K	Y	0.95	0	0	4.68	1	0	0	0	2	792.389	36	41
Male	mucin 10	IPI00116916	33534.7	1	4	4	6	3.05e-05	0.0897	KMCPPGTTLMLISR	Y	R	0.95	2.68	0.354	0	0	1	0	0	1	1604.83	69	82
Male	mucin 10	IPI00116916	33534.7	1	4	4	6	3.05e-05	0.0897	KYLEDPR	R	Y	0.95	2.06	0.124	1.03	2	0	0	0	2	920.484	35	41
Male	mucin 10	IPI00116916	33534.7	1	4	4	6	3.05e-05	0.0897	MCPPGTTLMLISR	K	R	0.95	0	0	5.66	0	1	0	0	2	1476.74	70	82
Male	mucin 10	IPI00116916	33534.7	1	4	4	6	3.05e-05	0.0897	RQIISDK	K	T	0.95	0	0	3.34	0	2	0	0	2	859.5	93	99
Female	Mucin-19	IPI00464259	693483	1	3	3	3	1.46e-05	0.00638	ALIDDVEILVVR	K	N	0.95	1.94	0.247	4	0	1	0	0	2	1354.79	111	122
Female	Mucin-19	IPI00464259	693483	1	3	3	3	1.46e-05	0.00638	HYEPCGTVTAK	W	T	0.95	2.72	0.327	0	0	1	0	0	1	1262.58	1130	1140
Female	Mucin-19	IPI00464259	693483	1	3	3	3	1.46e-05	0.00638	TTCGLCGNFDSVPGDDVNEHIASSK	Y	I	0.95	4	0.445	0	0	0	1	0	1	2680.16	177	201
Male	nerve growth factor, beta isoform A	IPI00336602	33768.9	1	2	2	4	1.91e-05	0.0684	CTTTHTFVK	Y	A	0.95	3.28	0.357	0	0	3	0	0	1	1094.53	267	275
Male	nerve growth factor, beta isoform A	IPI00336602	33768.9	1	2	2	4	1.91e-05	0.0684	SSTHPVFHMGEF	R	S	0.95	3.27	0.402	0	0	1	0	0	1	1375.61	188	199
Male	nerve growth factor, beta isoform A	IPI00336602	33768.9	1	3	3	7	3.55e-05	0.0977	EVTVLAEVNINNSVFR	K	Q	0.95	0	0	8.19	0	1	0	0	2	1803.96	222	237
Male	nerve growth factor, beta isoform A	IPI00336602	33768.9	1	3	3	7	3.55e-05	0.0977	HWNSYCTTTHTF	K	V	0.95	4.82	0.439	0	0	1	0	0	1	1554.64	262	273
Male	nerve growth factor, beta isoform A	IPI00336602	33768.9	1	3	3	7	3.55e-05	0.0977	HWNSYCTTTHTFVK	K	A	0.95	4.9	0.499	11	0	5	0	0	2	1781.81	262	275
Female	Nucleobindin-2	IPI00309704	50287.4	1	3	3	10	4.87e-05	0.0762	HQAVQHLEQK	Y	K	0.95	3.64	0.31	0	0	2	0	0	1	1217.64	390	399
Female	Nucleobindin-2	IPI00309704	50287.4	1	3	3	10	4.87e-05	0.0762	LHDVNNDGFLDEQELEALF	K	T	0.95	5.16	0.485	0	0	7	0	0	1	2218.03	252	270
Female	Nucleobindin-2	IPI00309704	50287.4	1	3	3	10	4.87e-05	0.0762	QEYHQAVQHLEQK	K	K	0.95	2.94	0.28	2.59	0	1	0	0	2	1637.8	387	399
Female	Nucleobindin-2	IPI00309704	50287.4	1	3	4	8	4.94e-05	0.1	EHVMSEIDNNKDR	R	L	0.95	4.08	0.402	4.82	0	2	0	0	2	1586.72	299	311
Female	Nucleobindin-2	IPI00309704	50287.4	1	3	4	8	4.94e-05	0.1	QEYHQAVQHLEQK	K	K	0.95	2.65	0.321	2.96	0	2	0	0	2	1637.8	387	399
Female	Nucleobindin-2	IPI00309704	50287.4	1	3	4	8	4.94e-05	0.1	QFEHLNHQNPNTFESR	K	D	0.95	2.72	0.316	3.62	0	3	1	0	2	1997.92	138	153
Male	Nucleobindin-2	IPI00309704	50287.4	1	4	4	13	6.08e-05	0.138	HQAVQHLEQK	Y	K	0.95	3.48	0.313	0	0	2	0	0	1	1217.64	390	399
Male	Nucleobindin-2	IPI00309704	50287.4	1	4	4	13	6.08e-05	0.138	LHDVNNDGFLDEQELEALF	K	T	0.95	4.85	0.442	0	0	6	0	0	1	2218.03	252	270
Male	Nucleobindin-2	IPI00309704	50287.4	1	4	4	13	6.08e-05	0.138	LVTLEEFLR	R	A	0.95	2.99	0.298	2.6	0	2	0	0	2	1119.64	312	320
Male	Nucleobindin-2	IPI00309704	50287.4	1	4	4	13	6.08e-05	0.138	TEDELKEYESIIAIQENELK	F	K	0.95	5.01	0.381	0	0	0	3	0	1	2394.19	343	362
Male	Nucleobindin-2	IPI00309704	50287.4	1	3	3	9	4.57e-05	0.069	HQAVQHLEQK	Y	K	0.95	2.78	0.292	0	0	6	0	0	1	1217.64	390	399
Male	Nucleobindin-2	IPI00309704	50287.4	1	3	3	9	4.57e-05	0.069	QEYHQAVQHLEQK	K	K	0.95	2.93	0.291	8.85	0	1	0	0	2	1637.8	387	399
Male	Nucleobindin-2	IPI00309704	50287.4	1	3	3	9	4.57e-05	0.069	QFEHLNHQNPNTFESR	K	D	0.95	3.05	0.256	2.96	0	2	0	0	2	1997.92	138	153
Female	Olfactory receptor Olfr460	IPI00125039	35329.8	0.998	2	2	2	9.74e-06	0.086	CYHFFKS	R	-	0.95	0	0	3.15	1	0	0	0	2	931.414	308	314
Female	Olfactory receptor Olfr460	IPI00125039	35329.8	0.998	2	2	2	9.74e-06	0.086	YLVTLVGNTVIIVIVCVDKR	F	L	0.95	3.57	0.16	0	0	1	0	0	1	2274.33	34	53
Female	Ovostatin homolog	IPI00169490	162266	1	4	4	6	2.92e-05	0.0398	DEKPETDNSPSFIPSALSGETEK	R	T	0.95	4.78	0.443	4.28	0	0	2	0	2	2478.15	1179	1201
Female	Ovostatin homolog	IPI00169490	162266	1	4	4	6	2.92e-05	0.0398	DGCASHIINTK	K	V	0.95	3.69	0.288	2.59	0	1	0	0	2	1215.58	287	297
Female	Ovostatin homolog	IPI00169490	162266	1	4	4	6	2.92e-05	0.0398	HVDTAQEGR	K	E	0.95	2.79	0.182	5.52	0	2	0	0	2	1012.48	1082	1090
Female	Ovostatin homolog	IPI00169490	162266	1	4	4	6	2.92e-05	0.0398	KPEVCSSQENQPLLR	R	T	0.95	5	0.428	7.62	0	1	0	0	2	1784.9	675	689
Female	Ovostatin homolog	IPI00169490	162266	1	3	3	5	2.44e-05	0.0275	HDSVDSISHAK	F	V	0.95	4.05	0.465	0	0	1	0	0	1	1195.57	712	722
Female	Ovostatin homolog	IPI00169490	162266	1	3	3	5	2.44e-05	0.0275	QTLLELPSNVVEGSVR	K	S	0.95	3.98	0.25	3.85	0	1	0	0	2	1740.95	928	943
Female	Ovostatin homolog	IPI00169490	162266	1	3	3	5	2.44e-05	0.0275	SSWLSPEYLDAYF	R	S	0.95	3.3	0.367	0	0	3	0	0	1	1577.72	423	435
Female	Ovostatin homolog	IPI00169490	162266	1	3	3	8	4.94e-05	0.0323	DGCASHIINTK	K	V	0.95	2.93	0.215	3.66	0	2	0	0	2	1215.58	287	297
Female	Ovostatin homolog	IPI00169490	162266	1	3	3	8	4.94e-05	0.0323	KPEVCSSQENQPLLR	R	T	0.95	0	0	7.66	0	4	0	0	2	1784.9	675	689
Female	Ovostatin homolog	IPI00169490	162266	1	3	3	8	4.94e-05	0.0323	TCYVLLAVLSQDTQDLDYASK	K	I	0.95	0	0	4.43	0	2	0	0	2	2403.18	1202	1222
Male	Ovostatin homolog	IPI00169490	162266	1	2	2	2	9.55e-06	0.0165	HVDTAQEGR	K	E	0.95	3.01	0.347	3.92	0	1	0	0	2	1012.48	1082	1090
Male	Ovostatin homolog	IPI00169490	162266	1	2	2	2	9.55e-06	0.0165	KPEVCSSQENQPLLR	R	T	0.95	0	0	9.15	0	1	0	0	2	1784.9	675	689
Male	Ovostatin homolog	IPI00169490	162266	1	3	3	4	1.87e-05	0.0275	HVDTAQEGR	K	E	0.95	3.15	0.378	4.92	0	2	0	0	2	1012.48	1082	1090
Male	Ovostatin homolog	IPI00169490	162266	1	3	3	4	1.87e-05	0.0275	KPEVCSSQENQPLLR	R	T	0.95	0	0	3.46	0	0	1	0	2	1784.9	675	689
Male	Ovostatin homolog	IPI00169490	162266	1	3	3	4	1.87e-05	0.0275	QTLLELPSNVVEGSVR	K	S	0.95	3.8	0.29	3.96	0	1	0	0	2	1740.95	928	943
Male	Ovostatin homolog	IPI00169490	162266	1	3	3	3	1.52e-05	0.0282	DGCASHIINTK	K	V	0.95	2.85	0.105	1.7	0	1	0	0	2	1215.58	287	297
Male	Ovostatin homolog	IPI00169490	162266	1	3	3	3	1.52e-05	0.0282	HVDTAQEGR	K	E	0.95	2.54	0.134	1.77	0	1	0	0	2	1012.48	1082	1090
Male	Ovostatin homolog	IPI00169490	162266	1	3	3	3	1.52e-05	0.0282	VSLQISQPFFVEVTSPFSVVR	K	S	0.95	5.89	0.425	6.15	0	1	0	0	2	2366.28	782	802
Female	Pancreatic alpha-amylase	IPI00133544	57399.4	1	13	16	214	0.00104	0.189	ADYMNHLIDIGVAGFR	V	L	0.95	5.08	0.509	0	0	11	0	0	1	1791.89	192	207
Female	Pancreatic alpha-amylase	IPI00133544	57399.4	1	13	16	214	0.00104	0.189	ALVFVDNHDNQR	R	G	0.95	4.01	0.352	6.55	0	7	0	0	2	1427.7	304	315	IPI00315893
Female	Pancreatic alpha-amylase	IPI00133544	57399.4	1	13	16	214	0.00104	0.189	CNNVGVR	R	I	0.95	2.32	0.132	2.16	3	0	0	0	2	818.394	101	107	IPI00315893
Female	Pancreatic alpha-amylase	IPI00133544	57399.4	1	13	16	214	0.00104	0.189	DLALEKDYVR	L	T	0.95	3.14	0.279	0	0	1	0	0	1	1221.65	179	188
Female	Pancreatic alpha-amylase	IPI00133544	57399.4	1	13	16	214	0.00104	0.189	HLIDIGVAGFR	N	L	0.95	3.94	0.321	0	0	26	0	0	1	1197.67	197	207
Female	Pancreatic alpha-amylase	IPI00133544	57399.4	1	13	16	214	0.00104	0.189	IDIGVAGFR	L	L	0.95	3.39	0.181	0	0	1	0	0	1	947.532	199	207
Female	Pancreatic alpha-amylase	IPI00133544	57399.4	1	13	16	214	0.00104	0.189	IYVDAVINHM	R	C	0.95	3.85	0.407	0	0	2	0	0	1	1174.59	108	117
Female	Pancreatic alpha-amylase	IPI00133544	57399.4	1	13	16	214	0.00104	0.189	LIDIGVAGFR	H	L	0.95	3.61	0.275	0	0	2	0	0	1	1060.62	198	207
Female	Pancreatic alpha-amylase	IPI00133544	57399.4	1	13	16	214	0.00104	0.189	MNHLIDIGVAGFR	Y	L	0.95	4.53	0.467	0	5	73	3	0	1	1442.76	195	207
Female	Pancreatic alpha-amylase	IPI00133544	57399.4	1	13	16	214	0.00104	0.189	NHLIDIGVAGFR	M	L	0.95	4.1	0.449	0	7	54	0	0	1	1311.72	196	207
Female	Pancreatic alpha-amylase	IPI00133544	57399.4	1	13	16	214	0.00104	0.189	NMVAFR	R	N	0.95	2.24	0.157	1.31	15	0	0	0	2	737.377	405	410	IPI00315893
Female	Pancreatic alpha-amylase	IPI00133544	57399.4	1	13	16	214	0.00104	0.189	SGNEDEFR	R	D	0.95	2.91	0.313	0	9	59	0	0	2	953.396	88	95	IPI00315893
Female	Pancreatic alpha-amylase	IPI00133544	57399.4	1	13	16	214	0.00104	0.189	TAIVHLFEWR	R	W	0.95	2.95	0.361	2.59	0	9	0	0	2	1271.69	26	35
Female	Pancreatic alpha-amylase	IPI00133544	57399.4	1	13	16	214	0.00104	0.189	VADYMNHLIDIGVAGF	K	R	0.95	3.75	0.403	0	0	9	0	0	1	1734.85	191	206
Female	Pancreatic alpha-amylase	IPI00133544	57399.4	1	13	16	214	0.00104	0.189	VADYMNHLIDIGVAGFR	K	L	0.95	4.88	0.455	3.92	0	39	21	0	2	1890.95	191	207	IPI00315893
Female	Pancreatic alpha-amylase	IPI00133544	57399.4	1	13	16	214	0.00104	0.189	VDNHDNQR	F	G	0.95	2.69	0.193	0	0	2	0	0	1	997.445	308	315
Female	Pancreatic alpha-amylase	IPI00133544	57399.4	1	13	16	214	0.00104	0.189	VFVDNHDNQR	L	G	0.95	3.17	0.244	0	0	1	0	0	1	1243.58	306	315
Female	Pancreatic alpha-amylase	IPI00133544	57399.4	1	13	16	214	0.00104	0.189	WFSQGSRPF	K	I	0.95	3.14	0.272	0	0	8	0	0	1	1111.53	233	241
Female	Pancreatic alpha-amylase	IPI00133544	57399.4	1	13	16	214	0.00104	0.189	YQPISYK	R	I	0.95	2.36	0.245	2.38	9	0	0	0	2	898.467	77	83	IPI00315893
Female	Pancreatic alpha-amylase	IPI00133544	57399.4	1	12	13	154	0.000752	0.181	ADYMNHLIDIGVAGFR	V	L	0.95	2.54	0.35	0	0	1	0	0	1	1791.89	192	207
Female	Pancreatic alpha-amylase	IPI00133544	57399.4	1	12	13	154	0.000752	0.181	ALVFVDNHDNQR	R	G	0.95	4.07	0.355	6.44	0	11	0	0	2	1427.7	304	315	IPI00315893
Female	Pancreatic alpha-amylase	IPI00133544	57399.4	1	12	13	154	0.000752	0.181	CNNVGVR	R	I	0.95	2.21	0.128	1.92	3	0	0	0	2	818.394	101	107	IPI00315893
Female	Pancreatic alpha-amylase	IPI00133544	57399.4	1	12	13	154	0.000752	0.181	DLALEKDYVR	L	T	0.95	3.34	0.274	0	0	2	0	0	1	1221.65	179	188
Female	Pancreatic alpha-amylase	IPI00133544	57399.4	1	12	13	154	0.000752	0.181	HLIDIGVAGFR	N	L	0.95	3.43	0.328	0	0	12	0	0	1	1197.67	197	207
Female	Pancreatic alpha-amylase	IPI00133544	57399.4	1	12	13	154	0.000752	0.181	IDIGVAGFR	L	L	0.95	3.32	0.241	0	0	2	0	0	1	947.532	199	207
Female	Pancreatic alpha-amylase	IPI00133544	57399.4	1	12	13	154	0.000752	0.181	LIDIGVAGFR	H	L	0.95	3.7	0.251	0	0	2	0	0	1	1060.62	198	207
Female	Pancreatic alpha-amylase	IPI00133544	57399.4	1	12	13	154	0.000752	0.181	MNHLIDIGVAGFR	Y	L	0.95	4.43	0.452	0	0	52	0	0	1	1442.76	195	207
Female	Pancreatic alpha-amylase	IPI00133544	57399.4	1	12	13	154	0.000752	0.181	NHLIDIGVAGFR	M	L	0.95	3.84	0.431	0	3	58	0	0	1	1311.72	196	207
Female	Pancreatic alpha-amylase	IPI00133544	57399.4	1	12	13	154	0.000752	0.181	NMVAFR	R	N	0.95	2.25	0.18	0.77	8	0	0	0	2	737.377	405	410	IPI00315893
Female	Pancreatic alpha-amylase	IPI00133544	57399.4	1	12	13	154	0.000752	0.181	RPWWER	S	Y	0.946	2.68	0.0879	0	0	1	0	0	1	929.475	71	76
Female	Pancreatic alpha-amylase	IPI00133544	57399.4	1	12	13	154	0.000752	0.181	SGNEDEFR	R	D	0.95	3.11	0.351	4.6	11	30	0	0	2	953.396	88	95	IPI00315893
Female	Pancreatic alpha-amylase	IPI00133544	57399.4	1	12	13	154	0.000752	0.181	TAIVHLFEWR	R	W	0.95	3.05	0.322	2.8	0	5	0	0	2	1271.69	26	35
Female	Pancreatic alpha-amylase	IPI00133544	57399.4	1	12	13	154	0.000752	0.181	VADYMNHLIDIGVAGFR	K	L	0.95	5.62	0.383	4.26	0	10	1	0	2	1890.95	191	207	IPI00315893
Female	Pancreatic alpha-amylase	IPI00133544	57399.4	1	12	13	154	0.000752	0.181	VDNHDNQR	F	G	0.95	2.65	0.203	0	0	7	0	0	1	997.445	308	315
Female	Pancreatic alpha-amylase	IPI00133544	57399.4	1	12	13	154	0.000752	0.181	VFVDNHDNQR	L	G	0.95	3.29	0.283	0	0	1	0	0	1	1243.58	306	315
Female	Pancreatic alpha-amylase	IPI00133544	57399.4	1	12	13	154	0.000752	0.181	WFSQGSRPF	K	I	0.95	3.1	0.188	0	0	8	0	0	1	1111.53	233	241
Female	Pancreatic alpha-amylase	IPI00133544	57399.4	1	12	13	154	0.000752	0.181	YQPISYK	R	I	0.95	0	0	3.48	12	7	0	0	2	898.467	77	83	IPI00315893
Female	Pancreatic alpha-amylase	IPI00133544	57399.4	1	12	14	260	0.00161	0.252	ADYMNHLIDIGVAGFR	V	L	0.95	6.09	0.512	0	0	9	0	0	1	1791.89	192	207
Female	Pancreatic alpha-amylase	IPI00133544	57399.4	1	12	14	260	0.00161	0.252	AIVHLFEWR	T	W	0.95	3.34	0.251	0	0	4	0	0	1	1170.64	27	35
Female	Pancreatic alpha-amylase	IPI00133544	57399.4	1	12	14	260	0.00161	0.252	ALVFVDNHDNQR	R	G	0.95	0	0	7.15	16	300	0	0	2	1427.7	304	315	IPI00315893
Female	Pancreatic alpha-amylase	IPI00133544	57399.4	1	12	14	260	0.00161	0.252	DYMNHLIDIGVAGFR	A	L	0.95	5.89	0.441	0	0	9	0	0	1	1720.85	193	207
Female	Pancreatic alpha-amylase	IPI00133544	57399.4	1	12	14	260	0.00161	0.252	FVDNHDNQR	V	G	0.95	2.78	0.18	0	0	1	0	0	1	1144.51	307	315
Female	Pancreatic alpha-amylase	IPI00133544	57399.4	1	12	14	260	0.00161	0.252	GHGAGGSSILTFWDAR	R	M	0.95	3.38	0.34	0	0	17	0	0	2	1631.79	316	331
Female	Pancreatic alpha-amylase	IPI00133544	57399.4	1	12	14	260	0.00161	0.252	HLIDIGVAGFR	N	L	0.95	3.73	0.314	0	1	2	0	0	1	1197.67	197	207
Female	Pancreatic alpha-amylase	IPI00133544	57399.4	1	12	14	260	0.00161	0.252	LHNLNTK	K	W	0.95	2.52	0.0926	2.24	5	0	0	0	2	839.474	226	232	IPI00315893
Female	Pancreatic alpha-amylase	IPI00133544	57399.4	1	12	14	260	0.00161	0.252	LVFVDNHDNQR	A	G	0.95	3.77	0.353	0	0	9	0	0	1	1356.67	305	315
Female	Pancreatic alpha-amylase	IPI00133544	57399.4	1	12	14	260	0.00161	0.252	MAVGFMLAHPYGFTR	K	V	0.95	4.48	0.348	3.59	0	1	0	0	2	1713.82	335	349	IPI00315893
Female	Pancreatic alpha-amylase	IPI00133544	57399.4	1	12	14	260	0.00161	0.252	MLAHPYGFTR	F	V	0.95	3.58	0.344	0	0	37	0	0	1	1192.59	340	349
Female	Pancreatic alpha-amylase	IPI00133544	57399.4	1	12	14	260	0.00161	0.252	NMVAFR	R	N	0.95	2.37	0.163	1.31	6	0	0	0	2	737.377	405	410	IPI00315893
Female	Pancreatic alpha-amylase	IPI00133544	57399.4	1	12	14	260	0.00161	0.252	NWGEGWGLVPSDR	K	A	0.95	3.85	0.287	4.7	0	21	0	0	2	1472.69	291	303
Female	Pancreatic alpha-amylase	IPI00133544	57399.4	1	12	14	260	0.00161	0.252	PFIFQEVIDLGGEAIKGSEYFGNGR	R	V	0.95	4.49	0.348	0	0	0	1	0	1	2743.37	240	264
Female	Pancreatic alpha-amylase	IPI00133544	57399.4	1	12	14	260	0.00161	0.252	TAIVHLFEWR	R	W	0.95	3.16	0.383	3	44	95	0	0	2	1271.69	26	35
Female	Pancreatic alpha-amylase	IPI00133544	57399.4	1	12	14	260	0.00161	0.252	VADYMNHLIDIGVAGFR	K	L	0.95	4.99	0.481	3.18	0	61	16	0	2	1890.95	191	207	IPI00315893
Female	Pancreatic alpha-amylase	IPI00133544	57399.4	1	12	14	260	0.00161	0.252	VFVDNHDNQR	L	G	0.95	3.37	0.308	0	0	10	0	0	1	1243.58	306	315
Female	Pancreatic alpha-amylase	IPI00133544	57399.4	1	12	14	260	0.00161	0.252	YQPISYK	R	I	0.95	2.42	0.241	3.41	17	0	0	0	2	898.467	77	83	IPI00315893
Male	Pancreatic alpha-amylase	IPI00133544	57399.4	1	9	13	97	0.000463	0.126	ALVFVDNHDNQR	R	G	0.95	3.96	0.336	5.54	0	4	0	0	2	1427.7	304	315	IPI00315893
Male	Pancreatic alpha-amylase	IPI00133544	57399.4	1	9	13	97	0.000463	0.126	FVDNHDNQR	V	G	0.95	2.92	0.243	0	0	3	0	0	1	1144.51	307	315
Male	Pancreatic alpha-amylase	IPI00133544	57399.4	1	9	13	97	0.000463	0.126	LIDIGVAGFR	H	L	0.95	3.88	0.239	0	0	3	0	0	1	1060.62	198	207
Male	Pancreatic alpha-amylase	IPI00133544	57399.4	1	9	13	97	0.000463	0.126	MNHLIDIGVAGFR	Y	L	0.95	4.47	0.468	0	6	48	6	0	1	1442.76	195	207
Male	Pancreatic alpha-amylase	IPI00133544	57399.4	1	9	13	97	0.000463	0.126	NHLIDIGVAGFR	M	L	0.95	3.91	0.305	0	3	7	3	0	1	1311.72	196	207
Male	Pancreatic alpha-amylase	IPI00133544	57399.4	1	9	13	97	0.000463	0.126	NMVAFR	R	N	0.95	2.37	0.137	0.854	6	0	0	0	2	737.377	405	410	IPI00315893
Male	Pancreatic alpha-amylase	IPI00133544	57399.4	1	9	13	97	0.000463	0.126	RPWWER	S	Y	0.948	2.53	0.0854	0	0	1	0	0	1	929.475	71	76
Male	Pancreatic alpha-amylase	IPI00133544	57399.4	1	9	13	97	0.000463	0.126	SGNEDEFR	R	D	0.95	3.08	0.333	4.54	0	33	0	0	2	953.396	88	95	IPI00315893
Male	Pancreatic alpha-amylase	IPI00133544	57399.4	1	9	13	97	0.000463	0.126	TAIVHLFEWR	R	W	0.95	3.14	0.328	2.8	0	4	0	0	2	1271.69	26	35
Male	Pancreatic alpha-amylase	IPI00133544	57399.4	1	9	13	97	0.000463	0.126	VDNHDNQR	F	G	0.95	2.68	0.195	0	0	3	0	0	1	997.445	308	315
Male	Pancreatic alpha-amylase	IPI00133544	57399.4	1	9	13	97	0.000463	0.126	VFVDNHDNQR	L	G	0.95	3.21	0.318	0	0	3	0	0	1	1243.58	306	315
Male	Pancreatic alpha-amylase	IPI00133544	57399.4	1	9	13	97	0.000463	0.126	WFSQGSRPF	K	I	0.95	3.03	0.245	0	0	7	0	0	1	1111.53	233	241
Male	Pancreatic alpha-amylase	IPI00133544	57399.4	1	10	14	107	0.0005	0.209	ALVFVDNHDNQR	R	G	0.95	4.1	0.323	6.6	0	5	0	0	2	1427.7	304	315	IPI00315893
Male	Pancreatic alpha-amylase	IPI00133544	57399.4	1	10	14	107	0.0005	0.209	CNNVGVR	R	I	0.95	2.46	0.141	1.96	3	0	0	0	2	818.394	101	107	IPI00315893
Male	Pancreatic alpha-amylase	IPI00133544	57399.4	1	10	14	107	0.0005	0.209	HLIDIGVAGFR	N	L	0.95	3.77	0.319	0	0	2	0	0	1	1197.67	197	207
Male	Pancreatic alpha-amylase	IPI00133544	57399.4	1	10	14	107	0.0005	0.209	IYVDAVINH	R	M	0.95	3.35	0.316	0	0	1	0	0	1	1043.55	108	116
Male	Pancreatic alpha-amylase	IPI00133544	57399.4	1	10	14	107	0.0005	0.209	IYVDAVINHM	R	C	0.95	3.79	0.341	0	0	2	0	0	1	1174.59	108	117
Male	Pancreatic alpha-amylase	IPI00133544	57399.4	1	10	14	107	0.0005	0.209	LHNLNTK	K	W	0.95	2.51	0.112	1.96	1	0	0	0	2	839.474	226	232	IPI00315893
Male	Pancreatic alpha-amylase	IPI00133544	57399.4	1	10	14	107	0.0005	0.209	LIDIGVAGFR	H	L	0.95	4.18	0.256	0	0	6	0	0	1	1060.62	198	207
Male	Pancreatic alpha-amylase	IPI00133544	57399.4	1	10	14	107	0.0005	0.209	MNHLIDIGVAGFR	Y	L	0.95	4.61	0.458	0	6	34	6	0	1	1442.76	195	207
Male	Pancreatic alpha-amylase	IPI00133544	57399.4	1	10	14	107	0.0005	0.209	NHLIDIGVAGFR	M	L	0.95	3.86	0.427	0	4	18	4	0	1	1311.72	196	207
Male	Pancreatic alpha-amylase	IPI00133544	57399.4	1	10	14	107	0.0005	0.209	NMVAFR	R	N	0.95	2.38	0.16	1.54	21	0	0	0	2	737.377	405	410	IPI00315893
Male	Pancreatic alpha-amylase	IPI00133544	57399.4	1	10	14	107	0.0005	0.209	NWGEGWGLVPSDR	K	A	0.95	3.49	0.261	4.96	0	1	0	0	2	1472.69	291	303
Male	Pancreatic alpha-amylase	IPI00133544	57399.4	1	10	14	107	0.0005	0.209	SGNEDEFR	R	D	0.95	3.07	0.335	3.82	5	71	0	0	2	953.396	88	95	IPI00315893
Male	Pancreatic alpha-amylase	IPI00133544	57399.4	1	10	14	107	0.0005	0.209	TAIVHLFEWR	R	W	0.95	3.28	0.335	2.74	0	19	0	0	2	1271.69	26	35
Male	Pancreatic alpha-amylase	IPI00133544	57399.4	1	10	14	107	0.0005	0.209	VADYMNHLIDIGVAGFR	K	L	0.95	4.11	0.368	4.24	0	0	2	0	2	1890.95	191	207	IPI00315893
Male	Pancreatic alpha-amylase	IPI00133544	57399.4	1	10	14	107	0.0005	0.209	WFSQGSR	K	P	0.95	2.98	0.172	0	1	0	0	0	1	867.411	233	239
Male	Pancreatic alpha-amylase	IPI00133544	57399.4	1	10	14	107	0.0005	0.209	WFSQGSRPF	K	I	0.95	3.13	0.196	0	0	3	0	0	1	1111.53	233	241
Male	Pancreatic alpha-amylase	IPI00133544	57399.4	1	10	14	107	0.0005	0.209	YQPISYK	R	I	0.95	0	0	3.11	6	1	0	0	2	898.467	77	83	IPI00315893
Male	Pancreatic alpha-amylase	IPI00133544	57399.4	1	14	18	367	0.00186	0.22	ADYMNHLIDIGVAGFR	V	L	0.95	6.07	0.484	0	0	2	0	0	1	1791.89	192	207
Male	Pancreatic alpha-amylase	IPI00133544	57399.4	1	14	18	367	0.00186	0.22	AIVHLFEWR	T	W	0.95	3.27	0.282	0	0	16	0	0	1	1170.64	27	35
Male	Pancreatic alpha-amylase	IPI00133544	57399.4	1	14	18	367	0.00186	0.22	ALVFVDNHDNQR	R	G	0.95	0	0	5.89	28	127	0	0	2	1427.7	304	315	IPI00315893
Male	Pancreatic alpha-amylase	IPI00133544	57399.4	1	14	18	367	0.00186	0.22	FVDNHDNQR	V	G	0.95	2.91	0.279	0	0	7	0	0	1	1144.51	307	315
Male	Pancreatic alpha-amylase	IPI00133544	57399.4	1	14	18	367	0.00186	0.22	GHGAGGSSILTFWDAR	R	M	0.95	3.13	0.353	4.25	0	9	0	0	2	1631.79	316	331
Male	Pancreatic alpha-amylase	IPI00133544	57399.4	1	14	18	367	0.00186	0.22	IVHLFEWR	A	W	0.95	2.83	0.275	0	0	6	0	0	1	1099.61	28	35
Male	Pancreatic alpha-amylase	IPI00133544	57399.4	1	14	18	367	0.00186	0.22	LAHPYGFTR	M	V	0.95	2.72	0.306	0	0	2	0	0	1	1061.55	341	349
Male	Pancreatic alpha-amylase	IPI00133544	57399.4	1	14	18	367	0.00186	0.22	LHNLNTK	K	W	0.95	2.51	0.0834	1.43	8	0	0	0	2	839.474	226	232	IPI00315893
Male	Pancreatic alpha-amylase	IPI00133544	57399.4	1	14	18	367	0.00186	0.22	LVFVDNHDNQR	A	G	0.95	3.59	0.352	0	0	12	0	0	1	1356.67	305	315
Male	Pancreatic alpha-amylase	IPI00133544	57399.4	1	14	18	367	0.00186	0.22	MAVGFMLAHPYGFTR	K	V	0.95	4.21	0.51	4.6	0	3	0	0	2	1713.82	335	349	IPI00315893
Male	Pancreatic alpha-amylase	IPI00133544	57399.4	1	14	18	367	0.00186	0.22	MLAHPYGFTR	F	V	0.95	3.58	0.347	0	0	38	0	0	1	1192.59	340	349
Male	Pancreatic alpha-amylase	IPI00133544	57399.4	1	14	18	367	0.00186	0.22	MNHLIDIGVAGFR	Y	L	0.95	4.55	0.462	0	13	29	0	0	1	1442.76	195	207
Male	Pancreatic alpha-amylase	IPI00133544	57399.4	1	14	18	367	0.00186	0.22	NHLIDIGVAGFR	M	L	0.95	4.06	0.412	0	7	17	0	0	1	1311.72	196	207
Male	Pancreatic alpha-amylase	IPI00133544	57399.4	1	14	18	367	0.00186	0.22	NMVAFR	R	N	0.95	2.33	0.182	1.43	13	0	0	0	2	737.377	405	410	IPI00315893
Male	Pancreatic alpha-amylase	IPI00133544	57399.4	1	14	18	367	0.00186	0.22	NWGEGWGLVPSDR	K	A	0.95	3.84	0.321	5.72	0	34	0	0	2	1472.69	291	303
Male	Pancreatic alpha-amylase	IPI00133544	57399.4	1	14	18	367	0.00186	0.22	TAIVHLFEWR	R	W	0.95	3.25	0.356	2.62	65	92	0	0	2	1271.69	26	35
Male	Pancreatic alpha-amylase	IPI00133544	57399.4	1	14	18	367	0.00186	0.22	VADYMNHLIDIGVAGFR	K	L	0.95	5.6	0.479	5.82	0	15	6	0	2	1890.95	191	207	IPI00315893
Male	Pancreatic alpha-amylase	IPI00133544	57399.4	1	14	18	367	0.00186	0.22	VFVDNHDNQR	L	G	0.95	3.72	0.315	0	1	13	0	0	1	1243.58	306	315
Male	Pancreatic alpha-amylase	IPI00133544	57399.4	1	14	18	367	0.00186	0.22	WFSQGSRPF	K	I	0.95	3.16	0.204	0	0	4	0	0	1	1111.53	233	241
Male	Pancreatic alpha-amylase	IPI00133544	57399.4	1	14	18	367	0.00186	0.22	YQPISYK	R	I	0.95	2.4	0.231	4	12	0	0	0	2	898.467	77	83	IPI00315893
Female	Parotid secretory protein	IPI00131763	24736.5	1	54	75	2183	0.0106	0.804	ATSWPLAKNSILETLNTADLGNLK	Q	S	0.95	3.7	0.259	0	0	0	1	0	1	2570.38	56	79
Female	Parotid secretory protein	IPI00131763	24736.5	1	54	75	2183	0.0106	0.804	CSSNTDKISISLLGR	K	R	0.95	5.3	0.473	8.21	0	5	1	0	2	1650.85	161	175	IPI00881015
Female	Parotid secretory protein	IPI00131763	24736.5	1	54	75	2183	0.0106	0.804	DLINSLSIK	L	T	0.95	3.05	0.134	0	0	2	0	0	1	1002.58	138	146
Female	Parotid secretory protein	IPI00131763	24736.5	1	54	75	2183	0.0106	0.804	ESLLGELGSAVNNLK	S	I	0.95	5.89	0.44	0	0	1	0	0	1	1543.83	19	33
Female	Parotid secretory protein	IPI00131763	24736.5	1	54	75	2183	0.0106	0.804	ETLNTADLGNLK	L	S	0.95	3.9	0.362	0	0	6	0	0	1	1288.68	68	79
Female	Parotid secretory protein	IPI00131763	24736.5	1	54	75	2183	0.0106	0.804	ILNPPSEAVPQ	K	N	0.95	2.71	0.39	0	0	3	0	0	1	1164.63	34	44
Female	Parotid secretory protein	IPI00131763	24736.5	1	54	75	2183	0.0106	0.804	ILNPPSEAVPQNL	K	N	0.95	2.7	0.416	0	0	5	0	0	1	1391.75	34	46
Female	Parotid secretory protein	IPI00131763	24736.5	1	54	75	2183	0.0106	0.804	ILNPPSEAVPQNLNLDVELL	K	Q	0.95	4.59	0.546	0	0	4	1	0	1	2188.19	34	53
Female	Parotid secretory protein	IPI00131763	24736.5	1	54	75	2183	0.0106	0.804	ILNPPSEAVPQNLNLDVELLQQ	K	A	0.95	3.74	0.594	0	0	3	2	0	1	2444.3	34	55
Female	Parotid secretory protein	IPI00131763	24736.5	1	54	75	2183	0.0106	0.804	ILNPPSEAVPQNLNLDVELLQQA	K	T	0.95	3.99	0.509	0	0	2	3	0	1	2515.34	34	56
Female	Parotid secretory protein	IPI00131763	24736.5	1	54	75	2183	0.0106	0.804	ILNPPSEAVPQNLNLDVELLQQAT	K	S	0.95	4	0.493	0	0	3	0	0	1	2616.39	34	57
Female	Parotid secretory protein	IPI00131763	24736.5	1	54	75	2183	0.0106	0.804	ILNPPSEAVPQNLNLDVELLQQATSWPL	K	A	0.95	4.05	0.493	0	0	0	1	0	1	3099.64	34	61
Female	Parotid secretory protein	IPI00131763	24736.5	1	54	75	2183	0.0106	0.804	ILNPPSEAVPQNLNLDVELLQQATSWPLAK	K	N	0.95	4.38	0.498	3.25	0	0	60	0	2	3298.77	34	63	IPI00881015
Female	Parotid secretory protein	IPI00131763	24736.5	1	54	75	2183	0.0106	0.804	ILNPPSEAVPQNLNLDVELLQQATSWPLAKN	K	S	0.95	3.6	0.402	0	0	0	2	0	1	3412.81	34	64
Female	Parotid secretory protein	IPI00131763	24736.5	1	54	75	2183	0.0106	0.804	INNLKVLDFQAK	K	L	0.95	4.66	0.287	8.09	0	1	0	0	2	1402.81	91	102	IPI00881015
Female	Parotid secretory protein	IPI00131763	24736.5	1	54	75	2183	0.0106	0.804	ISISLLGR	K	R	0.95	3.04	0.218	2.09	2	22	0	0	2	858.541	168	175	IPI00881015
Female	Parotid secretory protein	IPI00131763	24736.5	1	54	75	2183	0.0106	0.804	LDVELLQQATSWPLAK	N	N	0.95	5.35	0.46	0	0	8	3	0	1	1811.99	48	63
Female	Parotid secretory protein	IPI00131763	24736.5	1	54	75	2183	0.0106	0.804	LETLNTADLGNLK	I	S	0.95	3.58	0.386	0	2	1	0	0	1	1401.76	67	79
Female	Parotid secretory protein	IPI00131763	24736.5	1	54	75	2183	0.0106	0.804	LGELGSAVNNLK	L	I	0.95	4.02	0.222	0	1	3	0	0	1	1214.67	22	33
Female	Parotid secretory protein	IPI00131763	24736.5	1	54	75	2183	0.0106	0.804	LLGELGSAVNNLK	S	I	0.95	5.07	0.439	0	11	118	0	0	1	1327.76	21	33
Female	Parotid secretory protein	IPI00131763	24736.5	1	54	75	2183	0.0106	0.804	LNLDVELLQQATSWPLAK	N	N	0.95	5.64	0.475	0	0	10	4	0	1	2039.12	46	63
Female	Parotid secretory protein	IPI00131763	24736.5	1	54	75	2183	0.0106	0.804	LNPPSEAVPQNLNLDVELLQQATSWPLAK	I	N	0.95	4.74	0.493	0	0	0	11	0	1	3185.68	35	63
Female	Parotid secretory protein	IPI00131763	24736.5	1	54	75	2183	0.0106	0.804	LNTADLGNLK	T	S	0.95	3.34	0.258	0	0	4	0	0	1	1058.58	70	79
Female	Parotid secretory protein	IPI00131763	24736.5	1	54	75	2183	0.0106	0.804	LPIINSILDGVSTLL	R	T	0.95	3	0.4	0	0	6	0	0	1	1567.93	177	191
Female	Parotid secretory protein	IPI00131763	24736.5	1	54	75	2183	0.0106	0.804	LQQATSWPLAK	L	N	0.95	3.78	0.255	0	0	3	0	0	1	1242.68	53	63
Female	Parotid secretory protein	IPI00131763	24736.5	1	54	75	2183	0.0106	0.804	LQQATSWPLAKNSILETLNTADLGNLK	L	S	0.95	3.9	0.298	0	0	0	3	0	1	2939.58	53	79
Female	Parotid secretory protein	IPI00131763	24736.5	1	54	75	2183	0.0106	0.804	LSIKTNAQTGLPEVTIGK	S	C	0.95	3.66	0.287	0	0	5	0	0	1	1870.07	143	160
Female	Parotid secretory protein	IPI00131763	24736.5	1	54	75	2183	0.0106	0.804	LSSNGNGIDLTVPLAGEASLVLPF	K	I	0.95	4.17	0.454	0	0	1	2	0	1	2384.27	103	126
Female	Parotid secretory protein	IPI00131763	24736.5	1	54	75	2183	0.0106	0.804	LSSNGNGIDLTVPLAGEASLVLPFIGK	K	T	0.95	5.07	0.453	5	0	8	6	0	2	2682.47	103	129	IPI00881015
Female	Parotid secretory protein	IPI00131763	24736.5	1	54	75	2183	0.0106	0.804	NLDVELLQQATSWPLAK	L	N	0.95	5.99	0.533	0	0	208	137	0	1	1926.03	47	63
Female	Parotid secretory protein	IPI00131763	24736.5	1	54	75	2183	0.0106	0.804	NLNLDVELLQQATSWPLAK	Q	N	0.95	6.1	0.49	0	0	87	77	0	1	2153.16	45	63
Female	Parotid secretory protein	IPI00131763	24736.5	1	54	75	2183	0.0106	0.804	NSILETLNTA	K	D	0.95	3.22	0.353	0	0	2	0	0	1	1075.56	64	73
Female	Parotid secretory protein	IPI00131763	24736.5	1	54	75	2183	0.0106	0.804	NSILETLNTADLGNLK	K	S	0.95	0	0	7.26	0	169	18	0	2	1715.92	64	79	IPI00881015
Female	Parotid secretory protein	IPI00131763	24736.5	1	54	75	2183	0.0106	0.804	NSILETLNTADLGNLKSFTSLNGLLLK	K	I	0.95	0	0	3.96	0	0	6	0	2	2889.59	64	90	IPI00881015
Female	Parotid secretory protein	IPI00131763	24736.5	1	54	75	2183	0.0106	0.804	NSILETLNTADLGNLKSFTSLNGLLLKINNLK	K	V	0.95	4.28	0.424	5.36	0	0	11	0	2	3471.94	64	95	IPI00881015
Female	Parotid secretory protein	IPI00131763	24736.5	1	54	75	2183	0.0106	0.804	NTADLGNLK	L	S	0.95	2.54	0.215	0	0	3	0	0	1	945.501	71	79
Female	Parotid secretory protein	IPI00131763	24736.5	1	54	75	2183	0.0106	0.804	RLPIINSILDGVSTL	R	L	0.95	4.8	0.45	0	0	40	0	0	1	1610.95	176	190
Female	Parotid secretory protein	IPI00131763	24736.5	1	54	75	2183	0.0106	0.804	RLPIINSILDGVSTLL	R	T	0.95	4.77	0.51	0	0	139	1	0	1	1724.03	176	191
Female	Parotid secretory protein	IPI00131763	24736.5	1	54	75	2183	0.0106	0.804	RLPIINSILDGVSTLLTSTL	R	S	0.95	4.16	0.483	0	0	3	0	0	1	2126.24	176	195
Female	Parotid secretory protein	IPI00131763	24736.5	1	54	75	2183	0.0106	0.804	SFTSLNGLLLK	K	I	0.95	3.41	0.315	7.01	1	14	0	0	2	1192.69	80	90	IPI00881015
Female	Parotid secretory protein	IPI00131763	24736.5	1	54	75	2183	0.0106	0.804	SFTSLNGLLLKINNLK	K	V	0.95	5.29	0.428	4.18	0	11	0	0	2	1775.04	80	95	IPI00881015
Female	Parotid secretory protein	IPI00131763	24736.5	1	54	75	2183	0.0106	0.804	SFTSLNGLLLKINNLKVLDFQAK	K	L	0.95	4.42	0.363	6.04	0	9	23	0	2	2576.48	80	102	IPI00881015
Female	Parotid secretory protein	IPI00131763	24736.5	1	54	75	2183	0.0106	0.804	SILETLNTADLGNLK	N	S	0.95	4.38	0.393	0	0	6	1	0	1	1601.88	65	79
Female	Parotid secretory protein	IPI00131763	24736.5	1	54	75	2183	0.0106	0.804	SNLLAGQVQLAL	L	-	0.95	4.02	0.308	0	0	1	0	0	1	1226.71	224	235
Female	Parotid secretory protein	IPI00131763	24736.5	1	54	75	2183	0.0106	0.804	TNAQTGLPEVTIGK	K	C	0.95	4.82	0.412	6.72	19	118	0	0	2	1428.77	147	160	IPI00881015
Female	Parotid secretory protein	IPI00131763	24736.5	1	54	75	2183	0.0106	0.804	TSLNGLLLK	F	I	0.95	3.21	0.21	0	0	2	0	0	1	958.594	82	90
Female	Parotid secretory protein	IPI00131763	24736.5	1	54	75	2183	0.0106	0.804	TVDISVSLDLIN	K	S	0.95	4.35	0.374	0	0	67	0	0	1	1288.7	130	141
Female	Parotid secretory protein	IPI00131763	24736.5	1	54	75	2183	0.0106	0.804	TVDISVSLDLINSL	K	S	0.95	4.33	0.445	0	0	330	0	0	1	1488.82	130	143
Female	Parotid secretory protein	IPI00131763	24736.5	1	54	75	2183	0.0106	0.804	TVDISVSLDLINSLSIK	K	T	0.95	5.6	0.502	11.1	0	296	0	0	2	1817.03	130	146	IPI00881015
Female	Parotid secretory protein	IPI00131763	24736.5	1	54	75	2183	0.0106	0.804	TVDISVSLDLINSLSIKTNAQ	K	T	0.95	3.86	0.404	0	0	0	22	0	1	2231.21	130	150
Female	Parotid secretory protein	IPI00131763	24736.5	1	54	75	2183	0.0106	0.804	TVDISVSLDLINSLSIKTNAQTGLPE	K	V	0.95	3.84	0.242	0	0	0	3	0	1	2728.46	130	155
Female	Parotid secretory protein	IPI00131763	24736.5	1	54	75	2183	0.0106	0.804	TVDISVSLDLINSLSIKTNAQTGLPEVTIGK	K	C	0.95	4.99	0.507	3.62	0	0	10	0	2	3226.78	130	160	IPI00881015
Female	Parotid secretory protein	IPI00131763	24736.5	1	54	75	2183	0.0106	0.804	VLDFQAK	K	L	0.95	2.07	0.0924	0.824	1	1	0	0	2	820.457	96	102	IPI00881015
Female	Parotid secretory protein	IPI00131763	24736.5	1	54	75	2183	0.0106	0.804	VSLDLINSLSIK	S	T	0.95	4.59	0.352	0	0	7	0	0	1	1301.77	135	146
Female	Parotid secretory protein	IPI00881015	22304.5	0.998	2	2	6	2.92e-05	0.749	CSSNTDKISISLLGR	K	R	0.95	5.3	0.473	8.21	0	4	1	0	2	1650.85	161	175	IPI00131763
Female	Parotid secretory protein	IPI00881015	22304.5	0.998	2	2	6	2.92e-05	0.749	ILNPPSEAVPQNLNLDVELLQQATSWPLAK	K	N	0.95	4.05	0.418	6.35	0	0	56	0	2	3298.77	34	63	IPI00131763
Female	Parotid secretory protein	IPI00881015	22304.5	0.998	2	2	6	2.92e-05	0.749	INNLKVLDFQAK	K	L	0.95	4.66	0.287	8.09	0	1	0	0	2	1402.81	91	102	IPI00131763
Female	Parotid secretory protein	IPI00881015	22304.5	0.998	2	2	6	2.92e-05	0.749	ISISLLGR	K	R	0.95	2.54	0.219	2.44	2	20	0	0	2	858.541	168	175	IPI00131763
Female	Parotid secretory protein	IPI00881015	22304.5	0.998	2	2	6	2.92e-05	0.749	LSSNGNGIDLTVPLAGEASLVLPFIGK	K	T	0.95	5.38	0.485	12.2	0	8	5	0	2	2682.47	103	129	IPI00131763
Female	Parotid secretory protein	IPI00881015	22304.5	0.998	2	2	6	2.92e-05	0.749	NSILETLNTADLGNLK	K	S	0.95	5.47	0.378	12	0	157	17	0	2	1715.92	64	79	IPI00131763
Female	Parotid secretory protein	IPI00881015	22304.5	0.998	2	2	6	2.92e-05	0.749	NSILETLNTADLGNLKSFTSLNGLLLK	K	I	0.95	0	0	3.96	0	0	6	0	2	2889.59	64	90	IPI00131763
Female	Parotid secretory protein	IPI00881015	22304.5	0.998	2	2	6	2.92e-05	0.749	NSILETLNTADLGNLKSFTSLNGLLLKINNLK	K	V	0.95	4.48	0.303	8	0	0	10	0	2	3471.94	64	95	IPI00131763
Female	Parotid secretory protein	IPI00881015	22304.5	0.998	2	2	6	2.92e-05	0.749	QNFLCPLLQYVL	L	-	0.95	3.29	0.42	0	0	3	0	0	1	1507.8	200	211
Female	Parotid secretory protein	IPI00881015	22304.5	0.998	2	2	6	2.92e-05	0.749	SFTSLNGLLLK	K	I	0.95	3.41	0.315	7.01	1	13	0	0	2	1192.69	80	90	IPI00131763
Female	Parotid secretory protein	IPI00881015	22304.5	0.998	2	2	6	2.92e-05	0.749	SFTSLNGLLLKINNLK	K	V	0.95	4.86	0.343	6.38	0	11	0	0	2	1775.04	80	95	IPI00131763
Female	Parotid secretory protein	IPI00881015	22304.5	0.998	2	2	6	2.92e-05	0.749	SFTSLNGLLLKINNLKVLDFQAK	K	L	0.95	3.77	0.0542	8.66	0	8	23	0	2	2576.48	80	102	IPI00131763
Female	Parotid secretory protein	IPI00881015	22304.5	0.998	2	2	6	2.92e-05	0.749	STVLQNFLCPLLQYVL	L	-	0.95	5.24	0.493	0	0	3	0	0	1	1908.03	196	211
Female	Parotid secretory protein	IPI00881015	22304.5	0.998	2	2	6	2.92e-05	0.749	TNAQTGLPEVTIGK	K	C	0.95	4.69	0.348	9.7	19	117	0	0	2	1428.77	147	160	IPI00131763
Female	Parotid secretory protein	IPI00881015	22304.5	0.998	2	2	6	2.92e-05	0.749	TVDISVSLDLINSLSIK	K	T	0.95	5.6	0.502	11.1	0	238	0	0	2	1817.03	130	146	IPI00131763
Female	Parotid secretory protein	IPI00881015	22304.5	0.998	2	2	6	2.92e-05	0.749	TVDISVSLDLINSLSIKTNAQTGLPEVTIGK	K	C	0.95	0	0	5.24	0	0	7	0	2	3226.78	130	160	IPI00131763
Female	Parotid secretory protein	IPI00881015	22304.5	0.998	2	2	6	2.92e-05	0.749	VLDFQAK	K	L	0.95	2.04	-0.0316	3.47	1	1	0	0	2	820.457	96	102	IPI00131763
Female	Parotid secretory protein	IPI00131763	24736.5	1	47	62	3036	0.0148	0.847	ATSWPLAKNSILETLNTADLGNLK	Q	S	0.95	3.65	0.293	0	0	0	4	0	1	2570.38	56	79
Female	Parotid secretory protein	IPI00131763	24736.5	1	47	62	3036	0.0148	0.847	CSSNTDKISISLLGR	K	R	0.95	5.54	0.475	7.77	0	8	0	0	2	1650.85	161	175	IPI00881015
Female	Parotid secretory protein	IPI00131763	24736.5	1	47	62	3036	0.0148	0.847	DLINSLSIK	L	T	0.95	3.09	0.141	0	0	6	0	0	1	1002.58	138	146
Female	Parotid secretory protein	IPI00131763	24736.5	1	47	62	3036	0.0148	0.847	ELGSAVNNLK	G	I	0.95	2.65	0.224	0	0	1	0	0	1	1044.57	24	33
Female	Parotid secretory protein	IPI00131763	24736.5	1	47	62	3036	0.0148	0.847	ETLNTADLGNLK	L	S	0.95	3.77	0.375	0	0	3	0	0	1	1288.68	68	79
Female	Parotid secretory protein	IPI00131763	24736.5	1	47	62	3036	0.0148	0.847	ILNPPSEAVPQNL	K	N	0.95	3.34	0.391	0	0	28	0	0	1	1391.75	34	46
Female	Parotid secretory protein	IPI00131763	24736.5	1	47	62	3036	0.0148	0.847	ILNPPSEAVPQNLNLDVELL	K	Q	0.95	4.31	0.533	0	0	7	1	0	1	2188.19	34	53
Female	Parotid secretory protein	IPI00131763	24736.5	1	47	62	3036	0.0148	0.847	ILNPPSEAVPQNLNLDVELLQQ	K	A	0.95	3.51	0.355	0	0	3	1	0	1	2444.3	34	55
Female	Parotid secretory protein	IPI00131763	24736.5	1	47	62	3036	0.0148	0.847	ILNPPSEAVPQNLNLDVELLQQA	K	T	0.95	4.74	0.446	0	0	0	3	0	1	2515.34	34	56
Female	Parotid secretory protein	IPI00131763	24736.5	1	47	62	3036	0.0148	0.847	ILNPPSEAVPQNLNLDVELLQQAT	K	S	0.95	3.2	0.42	0	0	4	1	0	1	2616.39	34	57
Female	Parotid secretory protein	IPI00131763	24736.5	1	47	62	3036	0.0148	0.847	ILNPPSEAVPQNLNLDVELLQQATSWPL	K	A	0.95	4.1	0.491	0	0	0	3	0	1	3099.64	34	61
Female	Parotid secretory protein	IPI00131763	24736.5	1	47	62	3036	0.0148	0.847	ILNPPSEAVPQNLNLDVELLQQATSWPLAK	K	N	0.95	4.03	0.568	1.74	0	0	59	0	2	3298.77	34	63	IPI00881015
Female	Parotid secretory protein	IPI00131763	24736.5	1	47	62	3036	0.0148	0.847	ISISLLGR	K	R	0.95	3.02	0.219	1.62	5	32	0	0	2	858.541	168	175	IPI00881015
Female	Parotid secretory protein	IPI00131763	24736.5	1	47	62	3036	0.0148	0.847	LDVELLQQATSWPLAK	N	N	0.95	5.7	0.484	0	0	6	3	0	1	1811.99	48	63
Female	Parotid secretory protein	IPI00131763	24736.5	1	47	62	3036	0.0148	0.847	LGELGSAVNNLK	L	I	0.95	4.11	0.341	0	0	8	0	0	1	1214.67	22	33
Female	Parotid secretory protein	IPI00131763	24736.5	1	47	62	3036	0.0148	0.847	LLGELGSAVNNLK	S	I	0.95	4.63	0.435	0	11	169	1	0	1	1327.76	21	33
Female	Parotid secretory protein	IPI00131763	24736.5	1	47	62	3036	0.0148	0.847	LNLDVELLQQATSWPLAK	N	N	0.95	5.91	0.52	0	0	7	1	0	1	2039.12	46	63
Female	Parotid secretory protein	IPI00131763	24736.5	1	47	62	3036	0.0148	0.847	LNPPSEAVPQNLNLDVELLQQATSWPLAK	I	N	0.95	4.24	0.429	0	0	0	6	0	1	3185.68	35	63
Female	Parotid secretory protein	IPI00131763	24736.5	1	47	62	3036	0.0148	0.847	LNTADLGNLK	T	S	0.95	2.86	0.239	0	0	3	0	0	1	1058.58	70	79
Female	Parotid secretory protein	IPI00131763	24736.5	1	47	62	3036	0.0148	0.847	LPIINSILDGVSTLL	R	T	0.95	3.33	0.385	0	0	5	0	0	1	1567.93	177	191
Female	Parotid secretory protein	IPI00131763	24736.5	1	47	62	3036	0.0148	0.847	LPIINSILDGVSTLLTSTL	R	S	0.95	3.21	0.307	0	0	1	0	0	1	1970.14	177	195
Female	Parotid secretory protein	IPI00131763	24736.5	1	47	62	3036	0.0148	0.847	LSSNGNGIDLTVPLAGEASL	K	V	0.95	2.56	0.276	0	0	2	0	0	1	1928	103	122
Female	Parotid secretory protein	IPI00131763	24736.5	1	47	62	3036	0.0148	0.847	LSSNGNGIDLTVPLAGEASLVLPF	K	I	0.95	3.41	0.319	0	0	5	0	0	1	2384.27	103	126
Female	Parotid secretory protein	IPI00131763	24736.5	1	47	62	3036	0.0148	0.847	LSSNGNGIDLTVPLAGEASLVLPFIGK	K	T	0.95	4.76	0.473	5.72	0	11	24	0	2	2682.47	103	129	IPI00881015
Female	Parotid secretory protein	IPI00131763	24736.5	1	47	62	3036	0.0148	0.847	NLDVELLQQATSWPLAK	L	N	0.95	6.09	0.49	0	0	173	93	0	1	1926.03	47	63
Female	Parotid secretory protein	IPI00131763	24736.5	1	47	62	3036	0.0148	0.847	NLNLDVELLQQATSWPLAK	Q	N	0.95	5.43	0.487	0	0	65	45	0	1	2153.16	45	63
Female	Parotid secretory protein	IPI00131763	24736.5	1	47	62	3036	0.0148	0.847	NSILETLNTADLGNLK	K	S	0.95	0	0	11.6	0	186	18	0	2	1715.92	64	79	IPI00881015
Female	Parotid secretory protein	IPI00131763	24736.5	1	47	62	3036	0.0148	0.847	NSILETLNTADLGNLKSFTSLNGLLLKINNLK	K	V	0.95	4.95	0.451	4.4	0	0	6	0	2	3471.94	64	95	IPI00881015
Female	Parotid secretory protein	IPI00131763	24736.5	1	47	62	3036	0.0148	0.847	QGLLSNLLAGQVQLAL	L	-	0.95	3.81	0.305	0	0	3	0	0	1	1637.96	220	235
Female	Parotid secretory protein	IPI00131763	24736.5	1	47	62	3036	0.0148	0.847	QQATSWPLAK	L	N	0.95	2.55	0.271	0	0	1	0	0	1	1129.6	54	63
Female	Parotid secretory protein	IPI00131763	24736.5	1	47	62	3036	0.0148	0.847	RLPIINSILDGVSTL	R	L	0.95	4.3	0.395	0	0	32	0	0	1	1610.95	176	190
Female	Parotid secretory protein	IPI00131763	24736.5	1	47	62	3036	0.0148	0.847	RLPIINSILDGVSTLL	R	T	0.95	4.14	0.491	0	0	179	0	0	1	1724.03	176	191
Female	Parotid secretory protein	IPI00131763	24736.5	1	47	62	3036	0.0148	0.847	RLPIINSILDGVSTLLTSTL	R	S	0.95	2.83	0.308	0	0	1	0	0	1	2126.24	176	195
Female	Parotid secretory protein	IPI00131763	24736.5	1	47	62	3036	0.0148	0.847	SFTSLNGLLLK	K	I	0.95	3.73	0.267	5.92	1	29	0	0	2	1192.69	80	90	IPI00881015
Female	Parotid secretory protein	IPI00131763	24736.5	1	47	62	3036	0.0148	0.847	SFTSLNGLLLKINNLKVLDFQAK	K	L	0.95	0	0	6.64	0	6	87	0	2	2576.48	80	102	IPI00881015
Female	Parotid secretory protein	IPI00131763	24736.5	1	47	62	3036	0.0148	0.847	SILETLNTADLGNLK	N	S	0.95	5.82	0.404	0	0	7	0	0	1	1601.88	65	79
Female	Parotid secretory protein	IPI00131763	24736.5	1	47	62	3036	0.0148	0.847	SNLLAGQVQLAL	L	-	0.95	4.03	0.38	0	0	3	0	0	1	1226.71	224	235
Female	Parotid secretory protein	IPI00131763	24736.5	1	47	62	3036	0.0148	0.847	STLNPSVLQGLLSNLLAGQVQLAL	L	-	0.95	3.56	0.226	0	0	0	1	0	1	2449.4	212	235
Female	Parotid secretory protein	IPI00131763	24736.5	1	47	62	3036	0.0148	0.847	TLNPSVLQGLLSNLLAGQVQLAL	S	-	0.95	4.27	0.293	0	0	0	3	0	1	2362.37	213	235
Female	Parotid secretory protein	IPI00131763	24736.5	1	47	62	3036	0.0148	0.847	TNAQTGLPEVTIGK	K	C	0.95	0	0	6.46	14	184	0	0	2	1428.77	147	160	IPI00881015
Female	Parotid secretory protein	IPI00131763	24736.5	1	47	62	3036	0.0148	0.847	TVDISVSLDLIN	K	S	0.95	3.93	0.331	0	0	89	0	0	1	1288.7	130	141
Female	Parotid secretory protein	IPI00131763	24736.5	1	47	62	3036	0.0148	0.847	TVDISVSLDLINSL	K	S	0.95	5.06	0.426	0	0	745	0	0	1	1488.82	130	143
Female	Parotid secretory protein	IPI00131763	24736.5	1	47	62	3036	0.0148	0.847	TVDISVSLDLINSLSIK	K	T	0.95	0	0	8.77	0	573	0	0	2	1817.03	130	146	IPI00881015
Female	Parotid secretory protein	IPI00131763	24736.5	1	47	62	3036	0.0148	0.847	TVDISVSLDLINSLSIKTNAQ	K	T	0.95	3.76	0.488	0	0	0	46	0	1	2231.21	130	150
Female	Parotid secretory protein	IPI00131763	24736.5	1	47	62	3036	0.0148	0.847	TVDISVSLDLINSLSIKTNAQTGLPE	K	V	0.95	3.64	0.246	0	0	0	4	0	1	2728.46	130	155
Female	Parotid secretory protein	IPI00131763	24736.5	1	47	62	3036	0.0148	0.847	TVDISVSLDLINSLSIKTNAQTGLPEVTIGK	K	C	0.95	4.38	0.469	3.08	0	0	6	0	2	3226.78	130	160	IPI00881015
Female	Parotid secretory protein	IPI00131763	24736.5	1	47	62	3036	0.0148	0.847	VLDFQAK	K	L	0.95	2.23	0.124	0.77	4	0	0	0	2	820.457	96	102	IPI00881015
Female	Parotid secretory protein	IPI00881015	22304.5	0.998	2	2	5	2.44e-05	0.749	CSSNTDKISISLLGR	K	R	0.95	5.39	0.434	8.55	0	7	0	0	2	1650.85	161	175	IPI00131763
Female	Parotid secretory protein	IPI00881015	22304.5	0.998	2	2	5	2.44e-05	0.749	ILNPPSEAVPQNLNLDVELLQQATSWPLAK	K	N	0.95	0	0	6.08	0	0	57	0	2	3298.77	34	63	IPI00131763
Female	Parotid secretory protein	IPI00881015	22304.5	0.998	2	2	5	2.44e-05	0.749	ISISLLGR	K	R	0.95	2.86	0.23	2.44	5	32	0	0	2	858.541	168	175	IPI00131763
Female	Parotid secretory protein	IPI00881015	22304.5	0.998	2	2	5	2.44e-05	0.749	LSSNGNGIDLTVPLAGEASLVLPFIGK	K	T	0.95	5.09	0.445	8.8	0	11	19	0	2	2682.47	103	129	IPI00131763
Female	Parotid secretory protein	IPI00881015	22304.5	0.998	2	2	5	2.44e-05	0.749	NSILETLNTADLGNLK	K	S	0.95	6.25	0.402	12.2	0	178	15	0	2	1715.92	64	79	IPI00131763
Female	Parotid secretory protein	IPI00881015	22304.5	0.998	2	2	5	2.44e-05	0.749	NSILETLNTADLGNLKSFTSLNGLLLKINNLK	K	V	0.95	4.76	0.4	5.51	0	0	6	0	2	3471.94	64	95	IPI00131763
Female	Parotid secretory protein	IPI00881015	22304.5	0.998	2	2	5	2.44e-05	0.749	QNFLCPLLQYVL	L	-	0.95	3.35	0.384	0	0	3	0	0	1	1507.8	200	211
Female	Parotid secretory protein	IPI00881015	22304.5	0.998	2	2	5	2.44e-05	0.749	SFTSLNGLLLK	K	I	0.95	3.4	0.297	7.01	1	23	0	0	2	1192.69	80	90	IPI00131763
Female	Parotid secretory protein	IPI00881015	22304.5	0.998	2	2	5	2.44e-05	0.749	SFTSLNGLLLKINNLKVLDFQAK	K	L	0.95	5.15	0.379	9.01	0	5	83	0	2	2576.48	80	102	IPI00131763
Female	Parotid secretory protein	IPI00881015	22304.5	0.998	2	2	5	2.44e-05	0.749	STVLQNFLCPLLQYVL	L	-	0.95	5.04	0.497	0	0	2	0	0	1	1908.03	196	211
Female	Parotid secretory protein	IPI00881015	22304.5	0.998	2	2	5	2.44e-05	0.749	TNAQTGLPEVTIGK	K	C	0.95	5.44	0.363	10.1	14	183	0	0	2	1428.77	147	160	IPI00131763
Female	Parotid secretory protein	IPI00881015	22304.5	0.998	2	2	5	2.44e-05	0.749	TVDISVSLDLINSLSIK	K	T	0.95	5.9	0.375	11.6	0	522	0	0	2	1817.03	130	146	IPI00131763
Female	Parotid secretory protein	IPI00881015	22304.5	0.998	2	2	5	2.44e-05	0.749	TVDISVSLDLINSLSIKTNAQTGLPEVTIGK	K	C	0.95	3.92	0.43	4.41	0	0	6	0	2	3226.78	130	160	IPI00131763
Female	Parotid secretory protein	IPI00881015	22304.5	0.998	2	2	5	2.44e-05	0.749	VLDFQAK	K	L	0.95	2.2	0.0913	1	4	0	0	0	2	820.457	96	102	IPI00131763
Female	Parotid secretory protein	IPI00131763	24736.5	1	25	31	1686	0.0104	0.638	ESLLGELGSAVNNLK	S	I	0.95	5.73	0.392	0	0	1	0	0	1	1543.83	19	33
Female	Parotid secretory protein	IPI00131763	24736.5	1	25	31	1686	0.0104	0.638	ILNPPSEAVPQNLNLDVELLQQ	K	A	0.95	4.43	0.532	0	0	1	0	0	1	2444.3	34	55
Female	Parotid secretory protein	IPI00131763	24736.5	1	25	31	1686	0.0104	0.638	ILNPPSEAVPQNLNLDVELLQQATSWPL	K	A	0.95	3.79	0.356	0	0	0	2	0	1	3099.64	34	61
Female	Parotid secretory protein	IPI00131763	24736.5	1	25	31	1686	0.0104	0.638	ILNPPSEAVPQNLNLDVELLQQATSWPLAK	K	N	0.95	4.45	0.526	3.8	0	0	578	0	2	3298.77	34	63	IPI00881015
Female	Parotid secretory protein	IPI00131763	24736.5	1	25	31	1686	0.0104	0.638	ISISLLGR	K	R	0.95	3.05	0.22	1.55	30	11	0	0	2	858.541	168	175	IPI00881015
Female	Parotid secretory protein	IPI00131763	24736.5	1	25	31	1686	0.0104	0.638	LETLNTADLGNLK	I	S	0.95	3.89	0.314	0	1	0	0	0	1	1401.76	67	79
Female	Parotid secretory protein	IPI00131763	24736.5	1	25	31	1686	0.0104	0.638	LLGELGSAVNNLK	S	I	0.95	5	0.43	0	2	53	0	0	1	1327.76	21	33
Female	Parotid secretory protein	IPI00131763	24736.5	1	25	31	1686	0.0104	0.638	LNLDVELLQQATSWPLAK	N	N	0.95	6.09	0.492	0	0	3	0	0	1	2039.12	46	63
Female	Parotid secretory protein	IPI00131763	24736.5	1	25	31	1686	0.0104	0.638	LSSNGNGIDLTVPLAGEASLVLPF	K	I	0.95	3.75	0.342	0	0	30	0	0	1	2384.27	103	126
Female	Parotid secretory protein	IPI00131763	24736.5	1	25	31	1686	0.0104	0.638	LSSNGNGIDLTVPLAGEASLVLPFIGK	K	T	0.95	0	0	7.47	0	125	2	0	2	2682.47	103	129	IPI00881015
Female	Parotid secretory protein	IPI00131763	24736.5	1	25	31	1686	0.0104	0.638	NLDVELLQQATSWPLAK	L	N	0.95	5.84	0.531	0	0	9	0	0	1	1926.03	47	63
Female	Parotid secretory protein	IPI00131763	24736.5	1	25	31	1686	0.0104	0.638	NLNLDVELLQQATSWPLAK	Q	N	0.95	6.2	0.474	0	0	15	2	0	1	2153.16	45	63
Female	Parotid secretory protein	IPI00131763	24736.5	1	25	31	1686	0.0104	0.638	NSILETLNTADLGNLK	K	S	0.95	0	0	11.6	0	97	0	0	2	1715.92	64	79	IPI00881015
Female	Parotid secretory protein	IPI00131763	24736.5	1	25	31	1686	0.0104	0.638	NSILETLNTADLGNLKSFTSLNGLLLK	K	I	0.95	0	0	3.68	0	0	1	0	2	2889.59	64	90	IPI00881015
Female	Parotid secretory protein	IPI00131763	24736.5	1	25	31	1686	0.0104	0.638	NSILETLNTADLGNLKSFTSLNGLLLKINNLK	K	V	0.95	3.91	0.314	0	0	0	3	0	2	3471.94	64	95	IPI00881015
Female	Parotid secretory protein	IPI00131763	24736.5	1	25	31	1686	0.0104	0.638	PPSEAVPQNLNLDVELLQQATSWPLAK	N	N	0.95	5.71	0.487	0	0	1	0	0	1	2958.56	37	63
Female	Parotid secretory protein	IPI00131763	24736.5	1	25	31	1686	0.0104	0.638	PQNLNLDVELLQQATSWPLAK	V	N	0.95	7.12	0.601	0	0	176	0	0	1	2378.27	43	63
Female	Parotid secretory protein	IPI00131763	24736.5	1	25	31	1686	0.0104	0.638	SFTSLNGLLLK	K	I	0.95	3.51	0.324	6.6	2	12	0	0	2	1192.69	80	90	IPI00881015
Female	Parotid secretory protein	IPI00131763	24736.5	1	25	31	1686	0.0104	0.638	SFTSLNGLLLKINNLKVLDFQAK	K	L	0.95	4.3	0.19	6.96	0	0	2	0	2	2576.48	80	102	IPI00881015
Female	Parotid secretory protein	IPI00131763	24736.5	1	25	31	1686	0.0104	0.638	SILETLNTADLGNLK	N	S	0.95	5.64	0.42	0	0	3	0	0	1	1601.88	65	79
Female	Parotid secretory protein	IPI00131763	24736.5	1	25	31	1686	0.0104	0.638	TNAQTGLPEVTIGK	K	C	0.95	0	0	8.52	14	94	0	0	2	1428.77	147	160	IPI00881015
Female	Parotid secretory protein	IPI00131763	24736.5	1	25	31	1686	0.0104	0.638	TVDISVSLDLINSL	K	S	0.95	4.64	0.364	0	0	17	0	0	1	1488.82	130	143
Female	Parotid secretory protein	IPI00131763	24736.5	1	25	31	1686	0.0104	0.638	TVDISVSLDLINSLSIK	K	T	0.95	0	0	9.21	0	388	0	0	2	1817.03	130	146	IPI00881015
[truncated: 550 more rows]
