# Supplementary material for: Positive Selection Shaped the Convergent Evolution of Independently Expanded Kallikrein Subfamilies Expressed in Mouse and Rat Saliva Proteomes
Source: PLoS One. 2011 Jun 14;6(6):e20979. doi: 10.1371/journal.pone.0020979 (PMC3114847; doi:10.1371/journal.pone.0020979)
Supplement: Table S5 — Peptide report for the genome rat (BN/SsNHsd/Mcwi strain). (XLS) [file pone.0020979.s009.xls]

## Sheet: Peptide Report for BK_210268
Table S5. Peptide report for the genome rat (BN/SsNHsd/Mcwi strain)a
Sex	Protein name	Protein accession numbers	Database sources	Protein molecular weight (Da)	Protein identification probability	Number of unique peptides	Number of unique spectra	Number of total spectra	Percentage of total spectra	Percentage sequence coverage	Peptide sequence	Previous amino acid	Next amino acid	Best Peptide identification probability	Best SEQUEST XCorr score	Best SEQUEST DCn score	Best X! Tandem -log(e) score	Number of identified +1H spectra	Number of identified +2H spectra	Number of identified +3H spectra	Number of identified +4H spectra	Number of enzymatic termini	Calculated +1H Peptide Mass (AMU)	Peptide start index	Peptide stop index	Other Proteins
male	21 kDa protein	IPI00393647	ipi.RAT.v3.75.fasta	20799.8	0.998	2	2	8	0.000145	0.191	KPPQPGKPQGPPPPGGPQQ	Q	K	0.95	4.57	0.538	10.6	0	7	0	0	0	1889	59	77
male	21 kDa protein	IPI00393647	ipi.RAT.v3.75.fasta	20799.8	0.998	2	2	8	0.000145	0.191	PPQPGNQKPQGPPPPGGPQK	R	K	0.95	3.55	0.187	0	0	1	0	0	1	2003.05	117	136
female	Acidic mammalian chitinase	IPI00421295	ipi.RAT.v3.75.fasta	51934.6	1	15	16	151	0.00354	0.277	ADGLYPVADDR	K	N	0.95	3.86	0.366	4.4	0	5	0	0	2	1191.56	431	441
female	Acidic mammalian chitinase	IPI00421295	ipi.RAT.v3.75.fasta	51934.6	1	15	16	151	0.00354	0.277	AFEQEAIESNRPR	E	L	0.95	2.99	0.159	2.13	0	1	0	0	1	1546.76	165	177
female	Acidic mammalian chitinase	IPI00421295	ipi.RAT.v3.75.fasta	51934.6	1	15	16	151	0.00354	0.277	AIDLDDFTGSFCDQGK	W	F	0.95	5.99	0.468	0	0	14	0	0	1	1788.77	361	376
female	Acidic mammalian chitinase	IPI00421295	ipi.RAT.v3.75.fasta	51934.6	1	15	16	151	0.00354	0.277	DLHGSWDGYTGENSPLYK	Y	L	0.95	5.94	0.525	11.5	0	3	0	0	1	2038.91	213	230
female	Acidic mammalian chitinase	IPI00421295	ipi.RAT.v3.75.fasta	51934.6	1	15	16	151	0.00354	0.277	EAFEQEAIESNRPR	R	L	0.95	2.56	0.199	2.1	0	4	0	0	2	1675.8	164	177
female	Acidic mammalian chitinase	IPI00421295	ipi.RAT.v3.75.fasta	51934.6	1	15	16	151	0.00354	0.277	FPLTSTLNK	K	A	0.95	2.66	0.138	2.96	0	3	0	0	2	1020.57	377	385
female	Acidic mammalian chitinase	IPI00421295	ipi.RAT.v3.75.fasta	51934.6	1	15	16	151	0.00354	0.277	GFDGLDLDWEYPGSR	Y	G	0.95	5.7	0.468	6.49	0	6	0	0	1	1726.77	131	145
female	Acidic mammalian chitinase	IPI00421295	ipi.RAT.v3.75.fasta	51934.6	1	15	16	151	0.00354	0.277	IWAIDLDDFTGSFCDQGK	M	F	0.95	3.75	0.417	0	0	2	0	0	1	2087.94	359	376
female	Acidic mammalian chitinase	IPI00421295	ipi.RAT.v3.75.fasta	51934.6	1	15	16	151	0.00354	0.277	LIVGFPEYGHTY	K	I	0.95	3.56	0.35	5.77	2	29	0	0	1	1395.69	260	271
female	Acidic mammalian chitinase	IPI00421295	ipi.RAT.v3.75.fasta	51934.6	1	15	16	151	0.00354	0.277	LPTETGSNAY	K	L	0.95	2.32	0.111	1.64	1	0	0	0	1	1052.49	231	240
female	Acidic mammalian chitinase	IPI00421295	ipi.RAT.v3.75.fasta	51934.6	1	15	16	151	0.00354	0.277	PGLGSFKPDDINPCLCTHL	R	I	0.95	3.61	0.203	0	0	1	0	0	0	2141.02	36	54
female	Acidic mammalian chitinase	IPI00421295	ipi.RAT.v3.75.fasta	51934.6	1	15	16	151	0.00354	0.277	PGLGSFKPDDINPCLCTHLIY	R	A	0.95	4.66	0.39	0	0	3	0	0	0	2417.16	36	56
female	Acidic mammalian chitinase	IPI00421295	ipi.RAT.v3.75.fasta	51934.6	1	15	16	151	0.00354	0.277	QYGFDGLDLDWEYPGSR	R	G	0.95	5.23	0.483	8.55	0	69	0	0	2	2017.89	129	145
female	Acidic mammalian chitinase	IPI00421295	ipi.RAT.v3.75.fasta	51934.6	1	15	16	151	0.00354	0.277	QYGFDGLDLDWEYPGSRG	R	S	0.95	4.44	0.381	6.82	0	5	0	0	1	2074.91	129	146
female	Acidic mammalian chitinase	IPI00421295	ipi.RAT.v3.75.fasta	51934.6	1	15	16	151	0.00354	0.277	TGENSPLYK	Y	L	0.95	2.64	0.166	1.6	0	3	0	0	1	1008.5	222	230
male	Acidic mammalian chitinase	IPI00421295	ipi.RAT.v3.75.fasta	51934.6	1	16	18	209	0.00379	0.319	ADGLYPVADDR	K	N	0.95	3.96	0.344	4.89	0	10	0	0	2	1191.56	431	441
male	Acidic mammalian chitinase	IPI00421295	ipi.RAT.v3.75.fasta	51934.6	1	16	18	209	0.00379	0.319	AIDLDDFTGSFCDQGK	W	F	0.95	6.3	0.456	0	0	13	0	0	1	1788.77	361	376
male	Acidic mammalian chitinase	IPI00421295	ipi.RAT.v3.75.fasta	51934.6	1	16	18	209	0.00379	0.319	DLHGSWDGYTGENSPLYK	Y	L	0.95	6	0.481	12.7	0	4	0	0	1	2038.91	213	230
male	Acidic mammalian chitinase	IPI00421295	ipi.RAT.v3.75.fasta	51934.6	1	16	18	209	0.00379	0.319	EAFEQEAIESNRPR	R	L	0.95	2.58	0.226	2.48	0	1	0	0	2	1675.8	164	177
male	Acidic mammalian chitinase	IPI00421295	ipi.RAT.v3.75.fasta	51934.6	1	16	18	209	0.00379	0.319	FPLTSTLNK	K	A	0.95	2.51	0.0843	3	0	11	0	0	2	1020.57	377	385
male	Acidic mammalian chitinase	IPI00421295	ipi.RAT.v3.75.fasta	51934.6	1	16	18	209	0.00379	0.319	GFDGLDLDWEYPGSR	Y	G	0.95	5.22	0.514	6.92	0	3	0	0	1	1726.77	131	145
male	Acidic mammalian chitinase	IPI00421295	ipi.RAT.v3.75.fasta	51934.6	1	16	18	209	0.00379	0.319	IWAIDLDDFTGSFCDQGK	M	F	0.95	6.04	0.59	0	0	38	0	0	1	2087.94	359	376
male	Acidic mammalian chitinase	IPI00421295	ipi.RAT.v3.75.fasta	51934.6	1	16	18	209	0.00379	0.319	LIVGFPEYGHTY	K	I	0.95	3.75	0.373	6.44	13	26	0	0	1	1395.69	260	271
male	Acidic mammalian chitinase	IPI00421295	ipi.RAT.v3.75.fasta	51934.6	1	16	18	209	0.00379	0.319	LPTETGSNAY	K	L	0.95	2.62	0.207	1.07	1	0	0	0	1	1052.49	231	240
male	Acidic mammalian chitinase	IPI00421295	ipi.RAT.v3.75.fasta	51934.6	1	16	18	209	0.00379	0.319	PGLGSFKPDDINPCLCTHLIY	R	A	0.95	4.65	0.411	0	0	5	0	0	0	2417.16	36	56
male	Acidic mammalian chitinase	IPI00421295	ipi.RAT.v3.75.fasta	51934.6	1	16	18	209	0.00379	0.319	QYGFDGLDLDWEYPGSR	R	G	0.95	5.2	0.528	6.52	0	50	0	0	2	2017.89	129	145
male	Acidic mammalian chitinase	IPI00421295	ipi.RAT.v3.75.fasta	51934.6	1	16	18	209	0.00379	0.319	QYGFDGLDLDWEYPGSRG	R	S	0.95	4.06	0.158	3.82	0	1	0	0	1	2074.91	129	146
male	Acidic mammalian chitinase	IPI00421295	ipi.RAT.v3.75.fasta	51934.6	1	16	18	209	0.00379	0.319	TGENSPLYK	Y	L	0.95	3.59	0.311	3.47	8	20	0	0	1	1008.5	222	230
male	Acidic mammalian chitinase	IPI00421295	ipi.RAT.v3.75.fasta	51934.6	1	16	18	209	0.00379	0.319	TLLAIGGW	K	N	0.95	2.33	0.186	3.03	1	0	0	0	1	830.477	92	99
male	Acidic mammalian chitinase	IPI00421295	ipi.RAT.v3.75.fasta	51934.6	1	16	18	209	0.00379	0.319	TLLAIGGWNF	K	G	0.95	3.1	0.21	1.03	2	0	0	0	1	1091.59	92	101
male	Acidic mammalian chitinase	IPI00421295	ipi.RAT.v3.75.fasta	51934.6	1	16	18	209	0.00379	0.319	TTMVSTSQNR	F	Q	0.95	2.75	0.245	0	0	2	0	0	1	1124.54	107	116
female	Acidic proline-rich protein PRP25 (Fragment)	IPI00187925	ipi.RAT.v3.75.fasta	17397.5	1	3	4	13	0.000305	0.169	DPPPQGSPQQKPPQPGKPQGPPPPGGPQK	Q	K	0.95	0	0	3.1	0	0	1	0	1	2920.51	70	98
female	Acidic proline-rich protein PRP25 (Fragment)	IPI00187925	ipi.RAT.v3.75.fasta	17397.5	1	3	4	13	0.000305	0.169	KPPQPGKPQGPPPPGGPQK	Q	K	0.95	4.82	0.521	10.1	0	4	7	0	1	1889.04	80	98
female	Acidic proline-rich protein PRP25 (Fragment)	IPI00187925	ipi.RAT.v3.75.fasta	17397.5	1	3	4	13	0.000305	0.169	KPQGPPPPGGPQK	G	K	0.95	2.67	0.247	6.09	0	1	0	0	1	1284.71	86	98
male	Acidic proline-rich protein PRP25 (Fragment)	IPI00187925	ipi.RAT.v3.75.fasta	17397.5	1	5	7	59	0.00107	0.169	DPPPQGSPQQKPPQPGKPQGPPPPGGPQK	Q	K	0.95	0	0	4	0	0	1	0	1	2920.51	70	98
male	Acidic proline-rich protein PRP25 (Fragment)	IPI00187925	ipi.RAT.v3.75.fasta	17397.5	1	5	7	59	0.00107	0.169	GKPQGPPPPGGPQK	P	K	0.95	3.83	0.24	6.96	0	1	0	0	1	1341.73	85	98
male	Acidic proline-rich protein PRP25 (Fragment)	IPI00187925	ipi.RAT.v3.75.fasta	17397.5	1	5	7	59	0.00107	0.169	KPPQPGKPQGPPPPGGPQ	Q	K	0.95	4.64	0.508	11.4	0	3	5	0	0	1760.94	80	97
male	Acidic proline-rich protein PRP25 (Fragment)	IPI00187925	ipi.RAT.v3.75.fasta	17397.5	1	5	7	59	0.00107	0.169	KPPQPGKPQGPPPPGGPQK	Q	K	0.95	4.57	0.538	10.6	0	10	8	0	1	1889.04	80	98
male	Acidic proline-rich protein PRP25 (Fragment)	IPI00187925	ipi.RAT.v3.75.fasta	17397.5	1	5	7	59	0.00107	0.169	KPQGPPPPGGPQK	G	K	0.95	3.23	0.287	10.7	0	31	0	0	1	1284.71	86	98
male	Acidic proline-rich protein PRP33	IPI00195971	ipi.RAT.v3.75.fasta	21383.9	1	4	4	153	0.00278	0.272	PGNPQGPPPQGGPQQR	Q	P	0.95	5.24	0.41	0	0	5	0	0	0	1611.8	128	143
male	Acidic proline-rich protein PRP33	IPI00195971	ipi.RAT.v3.75.fasta	21383.9	1	4	4	153	0.00278	0.272	PQDPAQDATHEQPSYLW	K	F	0.95	4.19	0.448	0	0	5	0	0	0	1982.89	187	203
male	Acidic proline-rich protein PRP33	IPI00195971	ipi.RAT.v3.75.fasta	21383.9	1	4	4	153	0.00278	0.272	PQGPPPQGGPQQR	N	P	0.95	3.52	0.425	0	0	139	0	0	0	1343.68	131	143
male	Acidic proline-rich protein PRP33	IPI00195971	ipi.RAT.v3.75.fasta	21383.9	1	4	4	153	0.00278	0.272	SDEEVIYEDSSSQLLDVEQQNQK	G	H	0.95	6.02	0.526	0	0	4	0	0	1	2683.22	19	41
female	Alpha-2u globulin	IPI00206823	ipi.RAT.v3.75.fasta	20545	1	7	10	60	0.00141	0.354	DLSSDIK	K	E	0.95	2.67	0.0904	1.51	3	0	0	0	2	777.399	144	150
female	Alpha-2u globulin	IPI00206823	ipi.RAT.v3.75.fasta	20545	1	7	10	60	0.00141	0.354	GNLDVDKLNGDWF	R	S	0.95	4.22	0.409	5.52	0	5	0	0	1	1492.71	27	39
female	Alpha-2u globulin	IPI00206823	ipi.RAT.v3.75.fasta	20545	1	7	10	60	0.00141	0.354	HAEEASFER	G	G	0.95	2.95	0.234	2.72	0	3	0	0	1	1075.48	18	26
female	Alpha-2u globulin	IPI00206823	ipi.RAT.v3.75.fasta	20545	1	7	10	60	0.00141	0.354	LCVAHGITR	K	D	0.95	3.22	0.298	3.07	2	12	0	0	2	1026.55	156	164
female	Alpha-2u globulin	IPI00206823	ipi.RAT.v3.75.fasta	20545	1	7	10	60	0.00141	0.354	SIVVASDKR	F	E	0.95	2.63	0.281	3.2	3	12	0	0	1	974.563	40	48
female	Alpha-2u globulin	IPI00206823	ipi.RAT.v3.75.fasta	20545	1	7	10	60	0.00141	0.354	TKDLSSDIK	R	E	0.95	2.38	0.0804	2.72	1	2	0	0	2	1006.54	142	150
female	Alpha-2u globulin	IPI00206823	ipi.RAT.v3.75.fasta	20545	1	7	10	60	0.00141	0.354	VFVQHIDVLENSLGF	R	T	0.95	4.1	0	7.1	0	17	0	0	1	1716.9	59	73
female	Alpha-amylase	IPI00198466	ipi.RAT.v3.75.fasta	58812	1	75	98	2338	0.0548	0.712	ADYMNHLIDIGVAGFR	V	L	0.95	4.91	0.487	6.77	0	15	1	0	1	1791.88	205	220
female	Alpha-amylase	IPI00198466	ipi.RAT.v3.75.fasta	58812	1	75	98	2338	0.0548	0.712	AIHVESK	I	-	0.95	2.09	0.185	1.22	3	0	0	0	1	783.436	514	520
female	Alpha-amylase	IPI00198466	ipi.RAT.v3.75.fasta	58812	1	75	98	2338	0.0548	0.712	ALVFVDNHDNQR	R	G	0.95	3.62	0.417	4.3	6	22	0	0	2	1427.7	317	328	IPI00211904,IPI00565415
female	Alpha-amylase	IPI00198466	ipi.RAT.v3.75.fasta	58812	1	75	98	2338	0.0548	0.712	ANWWDNGSNQVAFGR	F	G	0.95	5.19	0.492	9.6	0	152	0	0	1	1721.78	432	446
female	Alpha-amylase	IPI00198466	ipi.RAT.v3.75.fasta	58812	1	75	98	2338	0.0548	0.712	APNGFGGVQVSPPNENIVVNSPFRPWWER	L	Y	0.95	3.17	0.073	3.12	0	0	1	0	1	3250.62	58	86
female	Alpha-amylase	IPI00198466	ipi.RAT.v3.75.fasta	58812	1	75	98	2338	0.0548	0.712	CDVISGDKVDGNCTGIK	Y	V	0.95	5.79	0.445	0	0	23	0	0	1	1837.84	475	491
female	Alpha-amylase	IPI00198466	ipi.RAT.v3.75.fasta	58812	1	75	98	2338	0.0548	0.712	CNNVGVR	R	I	0.95	2.51	0.138	1.07	16	0	0	0	2	818.394	111	117	IPI00211904
female	Alpha-amylase	IPI00198466	ipi.RAT.v3.75.fasta	58812	1	75	98	2338	0.0548	0.712	DNGSNQVAFGR	W	G	0.95	3.41	0.4	6.24	0	18	0	0	1	1164.54	436	446	IPI00565415
female	Alpha-amylase	IPI00198466	ipi.RAT.v3.75.fasta	58812	1	75	98	2338	0.0548	0.712	DVNDWVGPPNNNGATK	K	E	0.95	5.46	0.394	4.44	0	6	0	0	2	1697.79	378	393
female	Alpha-amylase	IPI00198466	ipi.RAT.v3.75.fasta	58812	1	75	98	2338	0.0548	0.712	DYMNHLIDIGVAGFR	A	L	0.95	5.94	0.455	8.51	0	3	1	0	1	1720.85	206	220
female	Alpha-amylase	IPI00198466	ipi.RAT.v3.75.fasta	58812	1	75	98	2338	0.0548	0.712	EDPFIAIHVESK	A	-	0.95	4.11	0.403	6.2	0	3	0	0	1	1384.71	509	520
female	Alpha-amylase	IPI00198466	ipi.RAT.v3.75.fasta	58812	1	75	98	2338	0.0548	0.712	EVTINSDSTCGNDWVCEHR	K	W	0.95	4.25	0.282	8.72	0	56	1	0	2	2278.95	394	412
female	Alpha-amylase	IPI00198466	ipi.RAT.v3.75.fasta	58812	1	75	98	2338	0.0548	0.712	FSISNSAEDPFIAIHVESK	Y	-	0.95	6.44	0.541	9.46	0	49	22	0	1	2091.04	502	520
female	Alpha-amylase	IPI00198466	ipi.RAT.v3.75.fasta	58812	1	75	98	2338	0.0548	0.712	FVDNHDNQR	V	G	0.95	3.02	0.285	2.46	0	4	0	0	1	1144.51	320	328	IPI00211904,IPI00565415
female	Alpha-amylase	IPI00198466	ipi.RAT.v3.75.fasta	58812	1	75	98	2338	0.0548	0.712	GFGGVQVSPPNENIVVNSPFR	N	P	0.95	4.5	0.517	0	0	2	0	0	0	2214.13	61	81
female	Alpha-amylase	IPI00198466	ipi.RAT.v3.75.fasta	58812	1	75	98	2338	0.0548	0.712	GFGGVQVSPPNENIVVNSPFRPWWER	N	Y	0.95	0	0	4.05	0	0	2	0	1	2968.49	61	86
female	Alpha-amylase	IPI00198466	ipi.RAT.v3.75.fasta	58812	1	75	98	2338	0.0548	0.712	GHGAGGSSIL	R	T	0.95	2.75	0.445	2.66	45	9	0	0	1	855.432	329	338
female	Alpha-amylase	IPI00198466	ipi.RAT.v3.75.fasta	58812	1	75	98	2338	0.0548	0.712	GHGAGGSSILTFWDAR	R	L	0.95	6.27	0.545	15.8	0	2	0	0	2	1631.79	329	344
female	Alpha-amylase	IPI00198466	ipi.RAT.v3.75.fasta	58812	1	75	98	2338	0.0548	0.712	GNDWVCEHR	C	W	0.95	2.64	0.196	0	0	1	0	0	1	1172.49	404	412
female	Alpha-amylase	IPI00198466	ipi.RAT.v3.75.fasta	58812	1	75	98	2338	0.0548	0.712	GSNQVAFGR	N	G	0.95	3.1	0.177	2.11	0	2	0	0	1	935.469	438	446	IPI00565415
female	Alpha-amylase	IPI00198466	ipi.RAT.v3.75.fasta	58812	1	75	98	2338	0.0548	0.712	HLIDIGVAGFR	N	L	0.95	4.02	0.335	4.8	5	25	0	0	1	1197.67	210	220
female	Alpha-amylase	IPI00198466	ipi.RAT.v3.75.fasta	58812	1	75	98	2338	0.0548	0.712	HMWPGDIK	K	A	0.95	3.21	0.239	1.72	0	24	0	0	2	983.477	226	233	IPI00211904,IPI00565415
female	Alpha-amylase	IPI00198466	ipi.RAT.v3.75.fasta	58812	1	75	98	2338	0.0548	0.712	IAIHVESK	F	-	0.95	3.02	0.0958	1.47	0	4	0	0	1	896.52	513	520
female	Alpha-amylase	IPI00198466	ipi.RAT.v3.75.fasta	58812	1	75	98	2338	0.0548	0.712	IDIGVAGFR	L	L	0.95	3.65	0.274	2.82	0	20	0	0	1	947.531	212	220	IPI00211904,IPI00565415
female	Alpha-amylase	IPI00198466	ipi.RAT.v3.75.fasta	58812	1	75	98	2338	0.0548	0.712	IYQEVIDLGGEAVSSNEYFGNGR	F	V	0.95	4.27	0.41	4.04	0	3	1	0	1	2517.19	255	277
female	Alpha-amylase	IPI00198466	ipi.RAT.v3.75.fasta	58812	1	75	98	2338	0.0548	0.712	IYVDAVINH	R	M	0.95	3.85	0.478	4.51	0	8	0	0	1	1043.55	118	126	IPI00211904
female	Alpha-amylase	IPI00198466	ipi.RAT.v3.75.fasta	58812	1	75	98	2338	0.0548	0.712	IYVDAVINHMCG	R	V	0.95	4.33	0	3.22	0	2	0	0	1	1334.62	118	129	IPI00211904
female	Alpha-amylase	IPI00198466	ipi.RAT.v3.75.fasta	58812	1	75	98	2338	0.0548	0.712	IYVDAVINHMCGVGAEAGQS	R	S	0.95	4.69	0.395	0	0	1	0	0	1	2090.96	118	137
female	Alpha-amylase	IPI00198466	ipi.RAT.v3.75.fasta	58812	1	75	98	2338	0.0548	0.712	IYVDAVINHMCGVGAEAGQSSTCGSY	R	F	0.95	5.63	0.482	0	0	3	0	0	1	2746.19	118	143
female	Alpha-amylase	IPI00198466	ipi.RAT.v3.75.fasta	58812	1	75	98	2338	0.0548	0.712	IYVDAVINHMCGVGAEAGQSSTCGSYF	R	N	0.95	4.5	0.384	0	0	1	0	0	1	2893.26	118	144
female	Alpha-amylase	IPI00198466	ipi.RAT.v3.75.fasta	58812	1	75	98	2338	0.0548	0.712	LAPNGFGGVQVSPPNENIVVNSPFRPWWER	Y	Y	0.95	1.42	-0.0972	4.41	0	0	5	0	1	3363.7	57	86
female	Alpha-amylase	IPI00198466	ipi.RAT.v3.75.fasta	58812	1	75	98	2338	0.0548	0.712	LHNLNTK	K	W	0.95	2.68	0.0905	1.3	24	0	0	0	2	839.473	239	245	IPI00211904,IPI00565415
female	Alpha-amylase	IPI00198466	ipi.RAT.v3.75.fasta	58812	1	75	98	2338	0.0548	0.712	LIDIGVAGFR	H	L	0.95	4.11	0.284	2.37	6	44	0	0	1	1060.62	211	220	IPI00211904
female	Alpha-amylase	IPI00198466	ipi.RAT.v3.75.fasta	58812	1	75	98	2338	0.0548	0.712	LSGLLDLALEK	R	D	0.95	4.01	0.368	5	14	142	0	0	2	1171.69	187	197
female	Alpha-amylase	IPI00198466	ipi.RAT.v3.75.fasta	58812	1	75	98	2338	0.0548	0.712	LSGLLDLALEKD	R	Y	0.95	3.55	0.199	0	0	1	0	0	1	1286.72	187	198
female	Alpha-amylase	IPI00198466	ipi.RAT.v3.75.fasta	58812	1	75	98	2338	0.0548	0.712	LSGLLDLALEKDYVR	R	T	0.95	2.45	0.0176	5.15	0	0	2	0	2	1704.95	187	201
female	Alpha-amylase	IPI00198466	ipi.RAT.v3.75.fasta	58812	1	75	98	2338	0.0548	0.712	LVFVDNHDNQR	A	G	0.95	3.69	0.177	2.32	0	2	0	0	1	1356.67	318	328	IPI00211904,IPI00565415
female	Alpha-amylase	IPI00198466	ipi.RAT.v3.75.fasta	58812	1	75	98	2338	0.0548	0.712	MAVGFMLAHPYGFTR	K	V	0.95	3.77	0.441	2.92	0	2	0	0	2	1713.82	348	362	IPI00211904
female	Alpha-amylase	IPI00198466	ipi.RAT.v3.75.fasta	58812	1	75	98	2338	0.0548	0.712	MNHLIDIGVAGFR	Y	L	0.95	4.67	0.438	0	5	65	13	0	1	1458.75	208	220
female	Alpha-amylase	IPI00198466	ipi.RAT.v3.75.fasta	58812	1	75	98	2338	0.0548	0.712	NHLIDIGVAGFR	M	L	0.95	3.7	0.425	7.04	5	72	11	0	1	1311.72	209	220
female	Alpha-amylase	IPI00198466	ipi.RAT.v3.75.fasta	58812	1	75	98	2338	0.0548	0.712	NMVAFR	R	N	0.95	2.32	0.113	0.745	12	0	0	0	2	737.376	418	423	IPI00211904,IPI00565415
female	Alpha-amylase	IPI00198466	ipi.RAT.v3.75.fasta	58812	1	75	98	2338	0.0548	0.712	NVVNGQPF	R	A	0.95	1.84	0.226	1.51	2	0	0	0	1	874.442	424	431	IPI00211904,IPI00565415
female	Alpha-amylase	IPI00198466	ipi.RAT.v3.75.fasta	58812	1	75	98	2338	0.0548	0.712	NWGEGWGF	K	M	0.95	2.48	0.273	1.89	4	0	0	0	1	952.395	304	311	IPI00211904,IPI00565415
female	Alpha-amylase	IPI00198466	ipi.RAT.v3.75.fasta	58812	1	75	98	2338	0.0548	0.712	NWGEGWGFMPSDR	K	A	0.95	4.3	0.452	6.89	0	6	0	0	2	1538.65	304	316
female	Alpha-amylase	IPI00198466	ipi.RAT.v3.75.fasta	58812	1	75	98	2338	0.0548	0.712	NWWDNGSNQVAFGR	A	G	0.95	5.4	0.495	11.5	0	10	0	0	1	1650.74	433	446
female	Alpha-amylase	IPI00198466	ipi.RAT.v3.75.fasta	58812	1	75	98	2338	0.0548	0.712	PFIAIHVESK	D	-	0.95	4.11	0.364	4.38	0	21	0	0	1	1140.64	511	520
female	Alpha-amylase	IPI00198466	ipi.RAT.v3.75.fasta	58812	1	75	98	2338	0.0548	0.712	QVSPPNENIVVNSPFRPWWER	V	Y	0.95	0	0	5.24	0	0	2	0	1	2534.26	66	86
female	Alpha-amylase	IPI00198466	ipi.RAT.v3.75.fasta	58812	1	75	98	2338	0.0548	0.712	SAEDPFIAIHVESK	N	-	0.95	4.81	0.381	8.66	0	2	0	0	1	1542.78	507	520
female	Alpha-amylase	IPI00198466	ipi.RAT.v3.75.fasta	58812	1	75	98	2338	0.0548	0.712	SDSTCGNDWVCEHR	N	W	0.95	3.66	0.389	0	0	11	0	0	1	1722.66	399	412
female	Alpha-amylase	IPI00198466	ipi.RAT.v3.75.fasta	58812	1	75	98	2338	0.0548	0.712	SGFDFNDGK	Y	C	0.95	3.18	0.367	4.7	14	121	0	0	1	986.422	157	165
female	Alpha-amylase	IPI00198466	ipi.RAT.v3.75.fasta	58812	1	75	98	2338	0.0548	0.712	SGLLDLALEK	L	D	0.95	3.7	0.308	2.72	2	9	0	0	1	1058.61	188	197
female	Alpha-amylase	IPI00198466	ipi.RAT.v3.75.fasta	58812	1	75	98	2338	0.0548	0.712	SGNEDEFR	R	D	0.95	3.07	0.352	4.08	18	187	0	0	2	953.396	98	105
female	Alpha-amylase	IPI00198466	ipi.RAT.v3.75.fasta	58812	1	75	98	2338	0.0548	0.712	SGNEDEFRDMVNR	R	C	0.95	3.31	0.127	3.38	0	1	0	0	2	1568.68	98	110
female	Alpha-amylase	IPI00198466	ipi.RAT.v3.75.fasta	58812	1	75	98	2338	0.0548	0.712	SISNSAEDPFIAIHVESK	F	-	0.95	6.48	0.536	8.19	0	227	79	0	1	1943.97	503	520
female	Alpha-amylase	IPI00198466	ipi.RAT.v3.75.fasta	58812	1	75	98	2338	0.0548	0.712	SISNSAEDPFIAIHVESKI	F	-	0.95	4.74	0.41	7.05	0	2	0	0	1	2057.05	503	521
female	Alpha-amylase	IPI00198466	ipi.RAT.v3.75.fasta	58812	1	75	98	2338	0.0548	0.712	SSIVHLFEWR	R	W	0.95	2.93	0.227	1.74	0	3	0	0	2	1273.67	36	45
female	Alpha-amylase	IPI00198466	ipi.RAT.v3.75.fasta	58812	1	75	98	2338	0.0548	0.712	STCGNDWVCEHR	D	W	0.95	4.09	0.388	0	0	1	0	0	1	1520.6	401	412
female	Alpha-amylase	IPI00198466	ipi.RAT.v3.75.fasta	58812	1	75	98	2338	0.0548	0.712	TGSGGIENYNDAAQVR	K	D	0.95	5.34	0.37	7.12	0	122	0	0	2	1651.77	168	183
female	Alpha-amylase	IPI00198466	ipi.RAT.v3.75.fasta	58812	1	75	98	2338	0.0548	0.712	VADYMNHLIDIGVA	K	G	0.95	2.68	0.138	2.09	0	2	0	0	1	1530.76	204	217
female	Alpha-amylase	IPI00198466	ipi.RAT.v3.75.fasta	58812	1	75	98	2338	0.0548	0.712	VADYMNHLIDIGVAGF	K	R	0.95	3.5	0.356	3.19	0	9	0	0	1	1734.85	204	219
female	Alpha-amylase	IPI00198466	ipi.RAT.v3.75.fasta	58812	1	75	98	2338	0.0548	0.712	VADYMNHLIDIGVAGFR	K	L	0.95	5.76	0.472	6.85	0	62	31	0	2	1890.95	204	220
female	Alpha-amylase	IPI00198466	ipi.RAT.v3.75.fasta	58812	1	75	98	2338	0.0548	0.712	VDGNCTGIK	K	V	0.95	2.99	0.318	2.8	0	24	0	0	2	963.457	483	491
female	Alpha-amylase	IPI00198466	ipi.RAT.v3.75.fasta	58812	1	75	98	2338	0.0548	0.712	VDNHDNQR	F	G	0.95	2.89	0.201	2.37	4	4	0	0	1	997.445	321	328	IPI00211904,IPI00565415
female	Alpha-amylase	IPI00198466	ipi.RAT.v3.75.fasta	58812	1	75	98	2338	0.0548	0.712	VFVDNHDNQR	L	G	0.95	3.45	0.287	4.37	0	12	0	0	1	1243.58	319	328	IPI00211904,IPI00565415
female	Alpha-amylase	IPI00198466	ipi.RAT.v3.75.fasta	58812	1	75	98	2338	0.0548	0.712	VTEFKYGAK	R	L	0.95	2.74	0.201	3.07	0	2	0	0	2	1042.56	278	286	IPI00211904
female	Alpha-amylase	IPI00198466	ipi.RAT.v3.75.fasta	58812	1	75	98	2338	0.0548	0.712	WFSEGSKPF	K	I	0.95	3.5	0.271	3.29	60	198	0	0	1	1084.51	246	254
female	Alpha-amylase	IPI00198466	ipi.RAT.v3.75.fasta	58812	1	75	98	2338	0.0548	0.712	WFSEGSKPFIYQEVIDLGGEAVSSNEYF	K	G	0.95	2.46	0.385	4.4	0	0	16	0	1	3198.49	246	273
female	Alpha-amylase	IPI00198466	ipi.RAT.v3.75.fasta	58812	1	75	98	2338	0.0548	0.712	WGEGWGFMPSDR	N	A	0.95	4.62	0.377	4.85	0	1	0	0	1	1424.61	305	316
female	Alpha-amylase	IPI00198466	ipi.RAT.v3.75.fasta	58812	1	75	98	2338	0.0548	0.712	WWDNGSNQVAFGR	N	G	0.95	3.84	0.452	7.49	0	4	0	0	1	1536.7	434	446
female	Alpha-amylase	IPI00198466	ipi.RAT.v3.75.fasta	58812	1	75	98	2338	0.0548	0.712	YFENGKDVNDWVGPPNNNGATK	R	E	0.95	5.62	0.548	1.62	0	4	3	0	2	2436.12	372	393
female	Alpha-amylase	IPI00198466	ipi.RAT.v3.75.fasta	58812	1	75	98	2338	0.0548	0.712	YLAPNGFGGVQVSPPNENIVVN	R	S	0.95	5.16	0.369	0	0	1	0	0	1	2285.16	56	77
female	Alpha-amylase	IPI00198466	ipi.RAT.v3.75.fasta	58812	1	75	98	2338	0.0548	0.712	YLAPNGFGGVQVSPPNENIVVNSPF	R	R	0.95	4	0.364	4.54	0	5	0	0	1	2616.31	56	80
female	Alpha-amylase	IPI00198466	ipi.RAT.v3.75.fasta	58812	1	75	98	2338	0.0548	0.712	YLAPNGFGGVQVSPPNENIVVNSPFR	R	P	0.95	3.13	0.395	6.74	0	2	0	0	1	2772.41	56	81
female	Alpha-amylase	IPI00198466	ipi.RAT.v3.75.fasta	58812	1	75	98	2338	0.0548	0.712	YLAPNGFGGVQVSPPNENIVVNSPFRPW	R	W	0.95	4.22	0.48	4.6	0	0	10	0	1	3055.54	56	83
female	Alpha-amylase	IPI00198466	ipi.RAT.v3.75.fasta	58812	1	75	98	2338	0.0548	0.712	YQPISYK	R	I	0.95	2.27	0.06	3.66	38	15	0	0	2	898.467	87	93	IPI00211904
male	Alpha-amylase	IPI00198466	ipi.RAT.v3.75.fasta	58812	1	83	108	3920	0.0711	0.689	ADYMNHLIDIGVAGFR	V	L	0.95	5.85	0.493	6.49	0	28	2	0	1	1791.88	205	220
male	Alpha-amylase	IPI00198466	ipi.RAT.v3.75.fasta	58812	1	83	108	3920	0.0711	0.689	ALVFVDNHDNQR	R	G	0.95	3.98	0.422	5.04	6	16	0	0	2	1427.7	317	328	IPI00211904,IPI00565415
male	Alpha-amylase	IPI00198466	ipi.RAT.v3.75.fasta	58812	1	83	108	3920	0.0711	0.689	ANWWDNGSNQVAFGR	F	G	0.95	5.36	0.477	9.64	0	54	0	0	1	1721.78	432	446
male	Alpha-amylase	IPI00198466	ipi.RAT.v3.75.fasta	58812	1	83	108	3920	0.0711	0.689	CDVISGDK	Y	V	0.95	3.26	0.182	0	0	8	0	0	1	893.404	475	482
male	Alpha-amylase	IPI00198466	ipi.RAT.v3.75.fasta	58812	1	83	108	3920	0.0711	0.689	CDVISGDKVDGNCTGIK	Y	V	0.95	5.85	0.405	0	0	10	0	0	1	1837.84	475	491
male	Alpha-amylase	IPI00198466	ipi.RAT.v3.75.fasta	58812	1	83	108	3920	0.0711	0.689	CNNVGVR	R	I	0.95	2.25	0.147	2.1	42	0	0	0	2	818.394	111	117	IPI00211904
male	Alpha-amylase	IPI00198466	ipi.RAT.v3.75.fasta	58812	1	83	108	3920	0.0711	0.689	DKLHNLNTK	L	W	0.95	2.63	0.225	1.47	0	4	0	0	1	1082.6	237	245	IPI00211904,IPI00565415
male	Alpha-amylase	IPI00198466	ipi.RAT.v3.75.fasta	58812	1	83	108	3920	0.0711	0.689	DNGSNQVAFGR	W	G	0.95	3.73	0.407	6.89	0	62	0	0	1	1164.54	436	446	IPI00565415
male	Alpha-amylase	IPI00198466	ipi.RAT.v3.75.fasta	58812	1	83	108	3920	0.0711	0.689	DVISGDKVDGNCTGIK	C	V	0.95	5.45	0.369	0	0	1	0	0	1	1677.81	476	491
male	Alpha-amylase	IPI00198466	ipi.RAT.v3.75.fasta	58812	1	83	108	3920	0.0711	0.689	DVNDWVGPPNNNGATK	K	E	0.95	5.29	0.402	5.37	0	62	0	0	2	1697.79	378	393
male	Alpha-amylase	IPI00198466	ipi.RAT.v3.75.fasta	58812	1	83	108	3920	0.0711	0.689	DYMNHLIDIGVAGFR	A	L	0.95	5.38	0.348	4.92	0	2	0	0	1	1720.85	206	220
male	Alpha-amylase	IPI00198466	ipi.RAT.v3.75.fasta	58812	1	83	108	3920	0.0711	0.689	EDPFIAIHVESK	A	-	0.95	2.51	0.413	3.82	0	2	0	0	1	1384.71	509	520
male	Alpha-amylase	IPI00198466	ipi.RAT.v3.75.fasta	58812	1	83	108	3920	0.0711	0.689	ENIVVNSPFRPWWER	N	Y	0.95	3.36	0.179	1.47	0	1	0	0	1	1928.98	72	86
male	Alpha-amylase	IPI00198466	ipi.RAT.v3.75.fasta	58812	1	83	108	3920	0.0711	0.689	EVTINSDSTCGNDWVCEHR	K	W	0.95	4.33	0.286	8.57	0	31	10	0	2	2278.95	394	412
male	Alpha-amylase	IPI00198466	ipi.RAT.v3.75.fasta	58812	1	83	108	3920	0.0711	0.689	FSISNSAEDPFIAIHVESK	Y	-	0.95	6.16	0.557	6.04	0	105	26	0	1	2091.04	502	520
male	Alpha-amylase	IPI00198466	ipi.RAT.v3.75.fasta	58812	1	83	108	3920	0.0711	0.689	GFGGVQVSPPNENIVVNSPFR	N	P	0.95	3.58	0.323	0	0	2	0	0	0	2214.13	61	81
male	Alpha-amylase	IPI00198466	ipi.RAT.v3.75.fasta	58812	1	83	108	3920	0.0711	0.689	GFGGVQVSPPNENIVVNSPFRPWWER	N	Y	0.95	0	0	3.52	0	0	1	0	1	2968.49	61	86
male	Alpha-amylase	IPI00198466	ipi.RAT.v3.75.fasta	58812	1	83	108	3920	0.0711	0.689	GGVQVSPPNENIVVNSPFR	F	P	0.95	4.99	0.436	0	0	2	0	0	0	2010.04	63	81
male	Alpha-amylase	IPI00198466	ipi.RAT.v3.75.fasta	58812	1	83	108	3920	0.0711	0.689	GGVQVSPPNENIVVNSPFRPWWER	F	Y	0.95	0	0	3.89	0	0	3	0	1	2764.4	63	86
male	Alpha-amylase	IPI00198466	ipi.RAT.v3.75.fasta	58812	1	83	108	3920	0.0711	0.689	GHGAGGSSIL	R	T	0.95	2.4	0.148	3.89	55	7	0	0	1	855.432	329	338
male	Alpha-amylase	IPI00198466	ipi.RAT.v3.75.fasta	58812	1	83	108	3920	0.0711	0.689	GHGAGGSSILTFWDAR	R	L	0.95	4.83	0.572	10.8	0	2	0	0	2	1631.79	329	344
male	Alpha-amylase	IPI00198466	ipi.RAT.v3.75.fasta	58812	1	83	108	3920	0.0711	0.689	GLLDLALEK	S	D	0.95	2.16	0.0964	1.19	3	0	0	0	1	971.577	189	197
male	Alpha-amylase	IPI00198466	ipi.RAT.v3.75.fasta	58812	1	83	108	3920	0.0711	0.689	GNDWVCEHR	C	W	0.95	2.55	0.262	0	0	1	0	0	1	1172.49	404	412
male	Alpha-amylase	IPI00198466	ipi.RAT.v3.75.fasta	58812	1	83	108	3920	0.0711	0.689	GSNQVAFGR	N	G	0.95	3.53	0.33	3.62	0	2	0	0	1	935.469	438	446	IPI00565415
male	Alpha-amylase	IPI00198466	ipi.RAT.v3.75.fasta	58812	1	83	108	3920	0.0711	0.689	HLIDIGVAGFR	N	L	0.95	3.74	0.323	5.36	3	72	0	0	1	1197.67	210	220
male	Alpha-amylase	IPI00198466	ipi.RAT.v3.75.fasta	58812	1	83	108	3920	0.0711	0.689	HMWPGDIK	K	A	0.95	2.97	0.237	1.41	0	18	0	0	2	983.477	226	233	IPI00211904,IPI00565415
male	Alpha-amylase	IPI00198466	ipi.RAT.v3.75.fasta	58812	1	83	108	3920	0.0711	0.689	IAIHVESK	F	-	0.95	3.22	0.12	1.47	0	11	0	0	1	896.52	513	520
male	Alpha-amylase	IPI00198466	ipi.RAT.v3.75.fasta	58812	1	83	108	3920	0.0711	0.689	IDIGVAGFR	L	L	0.95	3.57	0.277	3.52	0	30	0	0	1	947.531	212	220	IPI00211904,IPI00565415
male	Alpha-amylase	IPI00198466	ipi.RAT.v3.75.fasta	58812	1	83	108	3920	0.0711	0.689	ISNSAEDPFIAIHVESK	S	-	0.95	3.98	0.459	4.38	0	1	0	0	1	1856.94	504	520
male	Alpha-amylase	IPI00198466	ipi.RAT.v3.75.fasta	58812	1	83	108	3920	0.0711	0.689	IYQEVIDLGGEAVSSNEYFGNGR	F	V	0.95	5.12	0.401	1.36	0	72	10	0	1	2517.19	255	277
male	Alpha-amylase	IPI00198466	ipi.RAT.v3.75.fasta	58812	1	83	108	3920	0.0711	0.689	IYVDAVINH	R	M	0.95	3.67	0.452	5.02	0	6	0	0	1	1043.55	118	126	IPI00211904
male	Alpha-amylase	IPI00198466	ipi.RAT.v3.75.fasta	58812	1	83	108	3920	0.0711	0.689	IYVDAVINHM	R	C	0.95	3.98	0.373	5.28	0	6	0	0	1	1174.59	118	127	IPI00211904
male	Alpha-amylase	IPI00198466	ipi.RAT.v3.75.fasta	58812	1	83	108	3920	0.0711	0.689	IYVDAVINHMCG	R	V	0.95	4.14	0	5.48	0	6	0	0	1	1334.62	118	129	IPI00211904
male	Alpha-amylase	IPI00198466	ipi.RAT.v3.75.fasta	58812	1	83	108	3920	0.0711	0.689	IYVDAVINHMCGVGAEAGQS	R	S	0.95	4.67	0.377	0	0	1	0	0	1	2090.96	118	137
male	Alpha-amylase	IPI00198466	ipi.RAT.v3.75.fasta	58812	1	83	108	3920	0.0711	0.689	IYVDAVINHMCGVGAEAGQSSTCGSY	R	F	0.95	5.21	0.568	0	0	15	2	0	1	2746.19	118	143
male	Alpha-amylase	IPI00198466	ipi.RAT.v3.75.fasta	58812	1	83	108	3920	0.0711	0.689	IYVDAVINHMCGVGAEAGQSSTCGSYF	R	N	0.95	3.73	0.237	0	0	0	1	0	1	2893.26	118	144
male	Alpha-amylase	IPI00198466	ipi.RAT.v3.75.fasta	58812	1	83	108	3920	0.0711	0.689	LAPNGFGGVQVSPPNENIVVNSPFRPWWER	Y	Y	0.95	0	0	6.2	0	0	14	0	1	3363.7	57	86
male	Alpha-amylase	IPI00198466	ipi.RAT.v3.75.fasta	58812	1	83	108	3920	0.0711	0.689	LHNLNTK	K	W	0.95	2.43	0.0813	1.89	38	0	0	0	2	839.473	239	245	IPI00211904,IPI00565415
male	Alpha-amylase	IPI00198466	ipi.RAT.v3.75.fasta	58812	1	83	108	3920	0.0711	0.689	LIDIGVAGFR	H	L	0.95	4.25	0.279	2.46	20	40	0	0	1	1060.62	211	220	IPI00211904
male	Alpha-amylase	IPI00198466	ipi.RAT.v3.75.fasta	58812	1	83	108	3920	0.0711	0.689	LSGLLDLALEK	R	D	0.95	4.29	0.335	3.74	47	235	0	0	2	1171.69	187	197
male	Alpha-amylase	IPI00198466	ipi.RAT.v3.75.fasta	58812	1	83	108	3920	0.0711	0.689	LSGLLDLALEKD	R	Y	0.95	4.66	0.305	0	0	15	0	0	1	1286.72	187	198
male	Alpha-amylase	IPI00198466	ipi.RAT.v3.75.fasta	58812	1	83	108	3920	0.0711	0.689	LSGLLDLALEKDY	R	V	0.95	4.04	0.435	7.22	0	3	0	0	1	1449.78	187	199
male	Alpha-amylase	IPI00198466	ipi.RAT.v3.75.fasta	58812	1	83	108	3920	0.0711	0.689	LSGLLDLALEKDYVR	R	T	0.95	5.21	0.391	6.77	0	8	3	0	2	1704.95	187	201
male	Alpha-amylase	IPI00198466	ipi.RAT.v3.75.fasta	58812	1	83	108	3920	0.0711	0.689	LVFVDNHDNQR	A	G	0.95	3.57	0.261	3.4	0	2	0	0	1	1356.67	318	328	IPI00211904,IPI00565415
male	Alpha-amylase	IPI00198466	ipi.RAT.v3.75.fasta	58812	1	83	108	3920	0.0711	0.689	MNHLIDIGVAGFR	Y	L	0.95	4.71	0.453	0	5	152	56	0	1	1458.75	208	220
male	Alpha-amylase	IPI00198466	ipi.RAT.v3.75.fasta	58812	1	83	108	3920	0.0711	0.689	NDAAQVR	Y	D	0.95	2.62	0.119	1	10	0	0	0	1	773.39	177	183
male	Alpha-amylase	IPI00198466	ipi.RAT.v3.75.fasta	58812	1	83	108	3920	0.0711	0.689	NHLIDIGVAGFR	M	L	0.95	3.78	0.312	1.96	12	128	18	0	1	1311.72	209	220
male	Alpha-amylase	IPI00198466	ipi.RAT.v3.75.fasta	58812	1	83	108	3920	0.0711	0.689	NMVAFR	R	N	0.95	2.25	0.121	1.2	32	0	0	0	2	737.376	418	423	IPI00211904,IPI00565415
male	Alpha-amylase	IPI00198466	ipi.RAT.v3.75.fasta	58812	1	83	108	3920	0.0711	0.689	NSAEDPFIAIHVESK	S	-	0.95	5.47	0.481	9.92	0	12	0	0	1	1656.82	506	520
male	Alpha-amylase	IPI00198466	ipi.RAT.v3.75.fasta	58812	1	83	108	3920	0.0711	0.689	NVVNGQPF	R	A	0.95	1.92	0.27	1.89	6	0	0	0	1	874.442	424	431	IPI00211904,IPI00565415
male	Alpha-amylase	IPI00198466	ipi.RAT.v3.75.fasta	58812	1	83	108	3920	0.0711	0.689	NWGEGWGF	K	M	0.95	2.41	0.216	2.33	4	0	0	0	1	952.395	304	311	IPI00211904,IPI00565415
male	Alpha-amylase	IPI00198466	ipi.RAT.v3.75.fasta	58812	1	83	108	3920	0.0711	0.689	NWGEGWGFMPSDR	K	A	0.95	4.3	0.452	6.55	0	20	0	0	2	1538.65	304	316
male	Alpha-amylase	IPI00198466	ipi.RAT.v3.75.fasta	58812	1	83	108	3920	0.0711	0.689	NWWDNGSNQVAFGR	A	G	0.95	5.45	0.469	12.8	0	5	0	0	1	1650.74	433	446
male	Alpha-amylase	IPI00198466	ipi.RAT.v3.75.fasta	58812	1	83	108	3920	0.0711	0.689	PFIAIHVESK	D	-	0.95	4.01	0.404	3.74	0	104	0	0	1	1140.64	511	520
male	Alpha-amylase	IPI00198466	ipi.RAT.v3.75.fasta	58812	1	83	108	3920	0.0711	0.689	QEVIDLGGEAVSSNEYFGNGR	Y	V	0.95	4.63	0.308	2.39	0	2	0	0	1	2241.04	257	277
male	Alpha-amylase	IPI00198466	ipi.RAT.v3.75.fasta	58812	1	83	108	3920	0.0711	0.689	SAEDPFIAIHVESK	N	-	0.95	5.15	0.387	6.59	0	6	0	0	1	1542.78	507	520
male	Alpha-amylase	IPI00198466	ipi.RAT.v3.75.fasta	58812	1	83	108	3920	0.0711	0.689	SDSTCGNDWVCEHR	N	W	0.95	3.72	0.402	0	0	8	0	0	1	1722.66	399	412
male	Alpha-amylase	IPI00198466	ipi.RAT.v3.75.fasta	58812	1	83	108	3920	0.0711	0.689	SGFDFNDGK	Y	C	0.95	3.48	0.38	4.92	27	256	0	0	1	986.422	157	165
male	Alpha-amylase	IPI00198466	ipi.RAT.v3.75.fasta	58812	1	83	108	3920	0.0711	0.689	SGLLDLALEK	L	D	0.95	3.79	0.311	2.72	9	10	0	0	1	1058.61	188	197
male	Alpha-amylase	IPI00198466	ipi.RAT.v3.75.fasta	58812	1	83	108	3920	0.0711	0.689	SGLLDLALEKDYVR	L	T	0.95	4.08	0.454	5.52	0	1	0	0	1	1591.87	188	201
male	Alpha-amylase	IPI00198466	ipi.RAT.v3.75.fasta	58812	1	83	108	3920	0.0711	0.689	SGNEDEFR	R	D	0.95	3.09	0.356	4.01	147	264	0	0	2	953.396	98	105
male	Alpha-amylase	IPI00198466	ipi.RAT.v3.75.fasta	58812	1	83	108	3920	0.0711	0.689	SGNEDEFRDMVNR	R	C	0.95	2.95	0	4.03	0	2	0	0	2	1568.68	98	110
male	Alpha-amylase	IPI00198466	ipi.RAT.v3.75.fasta	58812	1	83	108	3920	0.0711	0.689	SISNSAEDPFIAIHVESK	F	-	0.95	6.66	0.544	9.48	0	270	121	0	1	1943.97	503	520
male	Alpha-amylase	IPI00198466	ipi.RAT.v3.75.fasta	58812	1	83	108	3920	0.0711	0.689	SISNSAEDPFIAIHVESKI	F	-	0.95	3.71	0.364	1.59	0	27	0	0	1	2057.05	503	521
male	Alpha-amylase	IPI00198466	ipi.RAT.v3.75.fasta	58812	1	83	108	3920	0.0711	0.689	SSIVHLFEWR	R	W	0.95	2.89	0.213	2.46	0	6	0	0	2	1273.67	36	45
male	Alpha-amylase	IPI00198466	ipi.RAT.v3.75.fasta	58812	1	83	108	3920	0.0711	0.689	TGSGGIENYNDAAQVR	K	D	0.95	5.37	0.425	9.05	0	237	0	0	2	1651.77	168	183
male	Alpha-amylase	IPI00198466	ipi.RAT.v3.75.fasta	58812	1	83	108	3920	0.0711	0.689	VADYMNHLIDIGVA	K	G	0.95	2.9	0.18	1.72	0	1	0	0	1	1530.76	204	217
male	Alpha-amylase	IPI00198466	ipi.RAT.v3.75.fasta	58812	1	83	108	3920	0.0711	0.689	VADYMNHLIDIGVAGF	K	R	0.95	3.43	0.396	3.68	0	8	0	0	1	1734.85	204	219
male	Alpha-amylase	IPI00198466	ipi.RAT.v3.75.fasta	58812	1	83	108	3920	0.0711	0.689	VADYMNHLIDIGVAGFR	K	L	0.95	5.61	0.493	6.21	0	130	78	0	2	1890.95	204	220
male	Alpha-amylase	IPI00198466	ipi.RAT.v3.75.fasta	58812	1	83	108	3920	0.0711	0.689	VDGNCTGIK	K	V	0.95	3.42	0.367	4.42	18	163	0	0	2	963.457	483	491
male	Alpha-amylase	IPI00198466	ipi.RAT.v3.75.fasta	58812	1	83	108	3920	0.0711	0.689	VDNHDNQR	F	G	0.95	2.71	0.211	3.23	4	6	0	0	1	997.445	321	328	IPI00211904,IPI00565415
male	Alpha-amylase	IPI00198466	ipi.RAT.v3.75.fasta	58812	1	83	108	3920	0.0711	0.689	VFVDNHDNQR	L	G	0.95	3.23	0.287	5.55	0	10	0	0	1	1243.58	319	328	IPI00211904,IPI00565415
male	Alpha-amylase	IPI00198466	ipi.RAT.v3.75.fasta	58812	1	83	108	3920	0.0711	0.689	VYVGSDGNAYF	K	S	0.95	3.71	0.375	6.36	0	3	0	0	1	1191.53	492	502
male	Alpha-amylase	IPI00198466	ipi.RAT.v3.75.fasta	58812	1	83	108	3920	0.0711	0.689	WFSEGSK	K	P	0.95	2.11	0.103	2.36	1	0	0	0	1	840.389	246	252
male	Alpha-amylase	IPI00198466	ipi.RAT.v3.75.fasta	58812	1	83	108	3920	0.0711	0.689	WFSEGSKPF	K	I	0.95	3.21	0.302	2.57	31	104	0	0	1	1084.51	246	254
male	Alpha-amylase	IPI00198466	ipi.RAT.v3.75.fasta	58812	1	83	108	3920	0.0711	0.689	WFSEGSKPFIYQEVIDLGGEAVSSNEYF	K	G	0.95	2.61	0.401	3.72	0	0	19	0	1	3198.49	246	273
male	Alpha-amylase	IPI00198466	ipi.RAT.v3.75.fasta	58812	1	83	108	3920	0.0711	0.689	WWDNGSNQVAFGR	N	G	0.95	3.76	0.441	8.85	0	2	0	0	1	1536.7	434	446
male	Alpha-amylase	IPI00198466	ipi.RAT.v3.75.fasta	58812	1	83	108	3920	0.0711	0.689	YFENGKDVNDWVGPPNNNGATK	R	E	0.95	5.85	0.529	4.23	0	4	0	0	2	2436.12	372	393
male	Alpha-amylase	IPI00198466	ipi.RAT.v3.75.fasta	58812	1	83	108	3920	0.0711	0.689	YLAPNGFGGVQ	R	V	0.95	1.95	0.331	2.54	2	0	0	0	1	1122.56	56	66
male	Alpha-amylase	IPI00198466	ipi.RAT.v3.75.fasta	58812	1	83	108	3920	0.0711	0.689	YLAPNGFGGVQVSPPNENIVVNSPF	R	R	0.95	4.07	0.37	4.19	0	3	0	0	1	2616.31	56	80
male	Alpha-amylase	IPI00198466	ipi.RAT.v3.75.fasta	58812	1	83	108	3920	0.0711	0.689	YLAPNGFGGVQVSPPNENIVVNSPFR	R	P	0.95	3.73	0.466	3.82	0	12	4	0	1	2772.41	56	81
male	Alpha-amylase	IPI00198466	ipi.RAT.v3.75.fasta	58812	1	83	108	3920	0.0711	0.689	YLAPNGFGGVQVSPPNENIVVNSPFRPW	R	W	0.95	4.48	0.556	4.92	0	0	64	0	1	3055.54	56	83
male	Alpha-amylase	IPI00198466	ipi.RAT.v3.75.fasta	58812	1	83	108	3920	0.0711	0.689	YQPISYK	R	I	0.95	1.68	0.225	3.47	42	25	0	0	2	898.467	87	93	IPI00211904
female	Anionic trypsin-1	IPI00212767	ipi.RAT.v3.75.fasta	25941.1	1	3	3	15	0.000351	0.0772	LGEHNINVLEGDEQF	R	I	0.95	3.02	0.233	0	0	5	0	0	1	1713.81	73	87
female	Anionic trypsin-1	IPI00212767	ipi.RAT.v3.75.fasta	25941.1	1	3	3	15	0.000351	0.0772	LGEHNINVLEGDEQFIN	R	A	0.95	4.17	0.311	0	0	2	0	0	1	1940.93	73	89
female	Anionic trypsin-1	IPI00212767	ipi.RAT.v3.75.fasta	25941.1	1	3	3	15	0.000351	0.0772	LGEHNINVLEGDEQFINAA	R	K	0.95	4.77	0.262	0	0	8	0	0	1	2083.01	73	91
male	Anionic trypsin-1	IPI00212767	ipi.RAT.v3.75.fasta	25941.1	1	4	4	24	0.000436	0.0772	LGEHNINVLEGDEQF	R	I	0.95	3.5	0.322	0	0	2	0	0	1	1713.81	73	87
male	Anionic trypsin-1	IPI00212767	ipi.RAT.v3.75.fasta	25941.1	1	4	4	24	0.000436	0.0772	LGEHNINVLEGDEQFIN	R	A	0.95	4.3	0.35	0	0	8	0	0	1	1940.93	73	89
male	Anionic trypsin-1	IPI00212767	ipi.RAT.v3.75.fasta	25941.1	1	4	4	24	0.000436	0.0772	LGEHNINVLEGDEQFINA	R	A	0.95	4.97	0.309	0	0	3	0	0	1	2011.97	73	90
male	Anionic trypsin-1	IPI00212767	ipi.RAT.v3.75.fasta	25941.1	1	4	4	24	0.000436	0.0772	LGEHNINVLEGDEQFINAA	R	K	0.95	5.19	0.248	0	0	11	0	0	1	2083.01	73	91
female	Apomucin	IPI00206980	ipi.RAT.v3.75.fasta	34957.6	1	9	10	71	0.00166	0.137	HSQVSSIYPR	R	Y	0.95	3.37	0.479	4.31	7	7	0	0	2	1173.6	44	53
female	Apomucin	IPI00206980	ipi.RAT.v3.75.fasta	34957.6	1	9	10	71	0.00166	0.137	LLHYHY	R	S	0.95	1.92	0.25	0	2	0	0	0	1	845.43	93	98
female	Apomucin	IPI00206980	ipi.RAT.v3.75.fasta	34957.6	1	9	10	71	0.00166	0.137	LLHYHYSR	R	F	0.95	2.72	0.224	0	0	3	0	0	2	1088.56	93	100
female	Apomucin	IPI00206980	ipi.RAT.v3.75.fasta	34957.6	1	9	10	71	0.00166	0.137	LQQPIYHR	R	R	0.95	2.88	0.0829	1.25	0	5	0	0	2	1054.58	35	42
female	Apomucin	IPI00206980	ipi.RAT.v3.75.fasta	34957.6	1	9	10	71	0.00166	0.137	QQAQKPQILPIQTPW	K	Q	0.95	4.4	0.393	6.34	0	38	0	0	1	1775.98	67	81
female	Apomucin	IPI00206980	ipi.RAT.v3.75.fasta	34957.6	1	9	10	71	0.00166	0.137	QQAQKPQILPIQTPWQ	K	R	0.95	3.43	0.225	5.21	0	1	0	0	1	1904.04	67	82
female	Apomucin	IPI00206980	ipi.RAT.v3.75.fasta	34957.6	1	9	10	71	0.00166	0.137	RHSQVSSIY	R	P	0.95	2.17	0.242	3.62	0	2	0	0	1	1076.55	43	51
female	Apomucin	IPI00206980	ipi.RAT.v3.75.fasta	34957.6	1	9	10	71	0.00166	0.137	RHSQVSSIYPR	R	Y	0.95	3.29	0.355	4.28	0	3	0	0	2	1329.7	43	53
female	Apomucin	IPI00206980	ipi.RAT.v3.75.fasta	34957.6	1	9	10	71	0.00166	0.137	RLQQPIYHR	Q	R	0.95	3.26	0.225	0	0	3	0	0	1	1210.68	34	42
male	Apomucin	IPI00206980	ipi.RAT.v3.75.fasta	34957.6	1	6	8	39	0.000708	0.112	HSQVSSIYPR	R	Y	0.95	3.14	0.416	4.47	4	3	0	0	2	1173.6	44	53
male	Apomucin	IPI00206980	ipi.RAT.v3.75.fasta	34957.6	1	6	8	39	0.000708	0.112	LQQPIYHR	R	R	0.95	2.96	0.0817	1.4	0	6	0	0	2	1054.58	35	42
male	Apomucin	IPI00206980	ipi.RAT.v3.75.fasta	34957.6	1	6	8	39	0.000708	0.112	QQAQKPQILPIQTPW	K	Q	0.95	4.2	0.393	4.14	0	20	0	0	1	1775.98	67	81
male	Apomucin	IPI00206980	ipi.RAT.v3.75.fasta	34957.6	1	6	8	39	0.000708	0.112	QQAQKPQILPIQTPWQ	K	R	0.95	3.84	0.156	2.05	0	1	0	0	1	1904.04	67	82
male	Apomucin	IPI00206980	ipi.RAT.v3.75.fasta	34957.6	1	6	8	39	0.000708	0.112	RHSQVSSIYPR	R	Y	0.95	3.32	0.221	5.01	0	3	1	0	2	1329.7	43	53
male	Apomucin	IPI00206980	ipi.RAT.v3.75.fasta	34957.6	1	6	8	39	0.000708	0.112	RLQQPIYHR	Q	R	0.95	3.34	0.274	0	0	1	0	0	1	1210.68	34	42
female	Ba1-667	IPI00196656	ipi.RAT.v3.75.fasta	107431	1	5	5	11	0.000258	0.0561	HLAQAPNHVVVSR	C	K	0.95	3.28	0.427	6.82	0	2	0	0	1	1427.79	584	596
female	Ba1-667	IPI00196656	ipi.RAT.v3.75.fasta	107431	1	5	5	11	0.000258	0.0561	HQTVLENTNGK	K	N	0.95	3.3	0.302	3.09	0	3	0	0	2	1240.63	541	551
female	Ba1-667	IPI00196656	ipi.RAT.v3.75.fasta	107431	1	5	5	11	0.000258	0.0561	IPSHAVVAR	R	N	0.95	2.67	0.269	4.28	0	2	0	0	2	949.558	251	259
female	Ba1-667	IPI00196656	ipi.RAT.v3.75.fasta	107431	1	5	5	11	0.000258	0.0561	NGDGKEDLIWEILK	R	V	0.95	4.92	0.227	4.66	0	1	0	0	2	1629.85	260	273
female	Ba1-667	IPI00196656	ipi.RAT.v3.75.fasta	107431	1	5	5	11	0.000258	0.0561	VAQEHFGK	K	G	0.95	2.76	0.137	2.4	0	3	0	0	2	915.468	274	281
female	carbonic anhydrase VI	IPI00569317	ipi.RAT.v3.75.fasta	36126.3	1	24	28	241	0.00565	0.433	AVMDHHNQTIR	N	N	0.95	1.83	0.235	3.52	0	1	0	0	1	1321.64	249	259
female	carbonic anhydrase VI	IPI00569317	ipi.RAT.v3.75.fasta	36126.3	1	24	28	241	0.00565	0.433	DSEISGSEHTIDGMR	R	H	0.95	4.76	0.502	8.05	0	8	0	0	2	1633.71	117	131
female	carbonic anhydrase VI	IPI00569317	ipi.RAT.v3.75.fasta	36126.3	1	24	28	241	0.00565	0.433	EWSYSGDDGLEESR	S	W	0.95	4.3	0.472	8.37	0	1	0	0	1	1629.67	20	33
female	carbonic anhydrase VI	IPI00569317	ipi.RAT.v3.75.fasta	36126.3	1	24	28	241	0.00565	0.433	HAIEIH	R	L	0.95	1.99	0.0968	0.886	1	0	0	0	1	719.384	132	137
female	carbonic anhydrase VI	IPI00569317	ipi.RAT.v3.75.fasta	36126.3	1	24	28	241	0.00565	0.433	HAIEIHL	R	V	0.95	2.66	0.246	1.96	0	2	0	0	1	832.468	132	138
female	carbonic anhydrase VI	IPI00569317	ipi.RAT.v3.75.fasta	36126.3	1	24	28	241	0.00565	0.433	HAIEIHLVH	R	F	0.95	3.48	0.436	4.42	0	3	0	0	1	1068.59	132	140
female	carbonic anhydrase VI	IPI00569317	ipi.RAT.v3.75.fasta	36126.3	1	24	28	241	0.00565	0.433	HAIEIHLVHF	R	N	0.95	3.6	0.471	4.24	5	56	0	0	1	1215.66	132	141
female	carbonic anhydrase VI	IPI00569317	ipi.RAT.v3.75.fasta	36126.3	1	24	28	241	0.00565	0.433	HAIEIHLVHFN	R	E	0.95	3.86	0.404	8.15	0	2	0	0	1	1329.71	132	142
female	carbonic anhydrase VI	IPI00569317	ipi.RAT.v3.75.fasta	36126.3	1	24	28	241	0.00565	0.433	HAIEIHLVHFNEK	R	Y	0.95	4.89	0.545	8.39	0	41	7	0	2	1586.84	132	144
female	carbonic anhydrase VI	IPI00569317	ipi.RAT.v3.75.fasta	36126.3	1	24	28	241	0.00565	0.433	IENAVMDHHNQTIR	R	N	0.95	5.06	0.497	7.2	0	6	1	0	2	1677.81	246	259
female	carbonic anhydrase VI	IPI00569317	ipi.RAT.v3.75.fasta	36126.3	1	24	28	241	0.00565	0.433	LSEWSYSGDDGLEESR	A	W	0.95	5.69	0.542	8.92	0	13	0	0	1	1829.78	18	33
female	carbonic anhydrase VI	IPI00569317	ipi.RAT.v3.75.fasta	36126.3	1	24	28	241	0.00565	0.433	LSEWSYSGDDGLEESRWPEK	A	Y	0.95	5.78	0.504	3.8	0	3	1	0	1	2370.05	18	37
female	carbonic anhydrase VI	IPI00569317	ipi.RAT.v3.75.fasta	36126.3	1	24	28	241	0.00565	0.433	QGSLTTPPCTENVK	Y	W	0.95	3.7	0.317	0	0	5	0	0	1	1531.74	215	228
female	carbonic anhydrase VI	IPI00569317	ipi.RAT.v3.75.fasta	36126.3	1	24	28	241	0.00565	0.433	SGDDGLEESRWPEK	Y	Y	0.95	3.93	0.266	2.39	0	3	0	0	1	1604.72	24	37
female	carbonic anhydrase VI	IPI00569317	ipi.RAT.v3.75.fasta	36126.3	1	24	28	241	0.00565	0.433	STFISELENVK	Y	Y	0.95	4.19	0.391	5.68	0	14	0	0	1	1266.66	177	187
female	carbonic anhydrase VI	IPI00569317	ipi.RAT.v3.75.fasta	36126.3	1	24	28	241	0.00565	0.433	SYSGDDGLEESR	W	W	0.95	3.45	0.45	4.72	0	7	0	0	1	1314.54	22	33
female	carbonic anhydrase VI	IPI00569317	ipi.RAT.v3.75.fasta	36126.3	1	24	28	241	0.00565	0.433	SYSGDDGLEESRWPEK	W	Y	0.95	4.06	0.328	5.49	0	1	0	0	1	1854.81	22	37
female	carbonic anhydrase VI	IPI00569317	ipi.RAT.v3.75.fasta	36126.3	1	24	28	241	0.00565	0.433	TYQGSLTTPPCTENVK	Y	W	0.95	4.63	0.486	0	0	5	0	0	1	1795.85	213	228
female	carbonic anhydrase VI	IPI00569317	ipi.RAT.v3.75.fasta	36126.3	1	24	28	241	0.00565	0.433	VFQDSATISK	F	A	0.95	3.36	0.341	4.49	0	3	0	0	1	1095.57	231	240
female	carbonic anhydrase VI	IPI00569317	ipi.RAT.v3.75.fasta	36126.3	1	24	28	241	0.00565	0.433	VVEANFPYSPDEVSK	R	N	0.95	5.21	0.491	8.74	0	14	0	0	2	1680.81	272	286
female	carbonic anhydrase VI	IPI00569317	ipi.RAT.v3.75.fasta	36126.3	1	24	28	241	0.00565	0.433	VVEANFPYSPDEVSKNHFY	R	M	0.95	4.04	0.219	0	0	2	0	0	1	2242.05	272	290
female	carbonic anhydrase VI	IPI00569317	ipi.RAT.v3.75.fasta	36126.3	1	24	28	241	0.00565	0.433	WFVFQDSATISK	K	A	0.95	4.05	0.258	6.68	0	5	0	0	2	1428.72	229	240
female	carbonic anhydrase VI	IPI00569317	ipi.RAT.v3.75.fasta	36126.3	1	24	28	241	0.00565	0.433	YETYEK	K	A	0.95	2.1	0.176	0.796	6	0	0	0	2	832.372	145	150
female	carbonic anhydrase VI	IPI00569317	ipi.RAT.v3.75.fasta	36126.3	1	24	28	241	0.00565	0.433	YTGQTTTLR	K	N	0.95	3.5	0.38	3.7	0	25	0	0	2	1040.54	188	196
male	carbonic anhydrase VI	IPI00569317	ipi.RAT.v3.75.fasta	36126.3	1	18	25	200	0.00363	0.458	DSEISGSEHTIDGMR	R	H	0.95	4.27	0.503	7.04	0	4	0	0	2	1649.71	117	131
male	carbonic anhydrase VI	IPI00569317	ipi.RAT.v3.75.fasta	36126.3	1	18	25	200	0.00363	0.458	HAIEIHLVHF	R	N	0.95	3.73	0.417	3.85	3	37	0	0	1	1215.66	132	141
male	carbonic anhydrase VI	IPI00569317	ipi.RAT.v3.75.fasta	36126.3	1	18	25	200	0.00363	0.458	HAIEIHLVHFNEK	R	Y	0.95	5.25	0.503	8.55	0	10	7	0	2	1586.84	132	144
male	carbonic anhydrase VI	IPI00569317	ipi.RAT.v3.75.fasta	36126.3	1	18	25	200	0.00363	0.458	IENAVMDHHNQTIR	R	N	0.95	4.93	0.523	5.42	0	3	1	0	2	1677.81	246	259
male	carbonic anhydrase VI	IPI00569317	ipi.RAT.v3.75.fasta	36126.3	1	18	25	200	0.00363	0.458	ISELENVK	F	Y	0.95	2.92	0.095	1.64	0	2	0	0	1	931.51	180	187
male	carbonic anhydrase VI	IPI00569317	ipi.RAT.v3.75.fasta	36126.3	1	18	25	200	0.00363	0.458	LSEWSYSGDDGLEESR	A	W	0.95	5.63	0.549	8.64	0	19	0	0	1	1829.78	18	33
male	carbonic anhydrase VI	IPI00569317	ipi.RAT.v3.75.fasta	36126.3	1	18	25	200	0.00363	0.458	LSEWSYSGDDGLEESRWPEK	A	Y	0.95	5.89	0.527	6.64	0	6	1	0	1	2370.05	18	37
male	carbonic anhydrase VI	IPI00569317	ipi.RAT.v3.75.fasta	36126.3	1	18	25	200	0.00363	0.458	QGSLTTPPCTENVK	Y	W	0.95	3.62	0.226	0	0	5	0	0	1	1531.74	215	228
male	carbonic anhydrase VI	IPI00569317	ipi.RAT.v3.75.fasta	36126.3	1	18	25	200	0.00363	0.458	STFISELENVK	Y	Y	0.95	4.38	0.39	5.35	2	12	0	0	1	1266.66	177	187
male	carbonic anhydrase VI	IPI00569317	ipi.RAT.v3.75.fasta	36126.3	1	18	25	200	0.00363	0.458	SYSGDDGLEESR	W	W	0.95	3.8	0.378	5.05	0	4	0	0	1	1314.54	22	33
male	carbonic anhydrase VI	IPI00569317	ipi.RAT.v3.75.fasta	36126.3	1	18	25	200	0.00363	0.458	TYQGSLTTPPCTENVK	Y	W	0.95	4.49	0.499	0	0	25	0	0	1	1795.85	213	228
male	carbonic anhydrase VI	IPI00569317	ipi.RAT.v3.75.fasta	36126.3	1	18	25	200	0.00363	0.458	VEANFPYSPDEVSK	V	N	0.95	0	0	3.64	0	1	0	0	1	1581.74	273	286
male	carbonic anhydrase VI	IPI00569317	ipi.RAT.v3.75.fasta	36126.3	1	18	25	200	0.00363	0.458	VEDYTENDYY	K	S	0.95	2.73	0.228	1.14	1	0	0	0	1	1310.51	167	176
male	carbonic anhydrase VI	IPI00569317	ipi.RAT.v3.75.fasta	36126.3	1	18	25	200	0.00363	0.458	VFQDSATISK	F	A	0.95	3.43	0.342	3.85	1	9	0	0	1	1095.57	231	240
male	carbonic anhydrase VI	IPI00569317	ipi.RAT.v3.75.fasta	36126.3	1	18	25	200	0.00363	0.458	VVEANFPYSPDEVSK	R	N	0.95	5.36	0.5	7.7	0	22	0	0	2	1680.81	272	286
male	carbonic anhydrase VI	IPI00569317	ipi.RAT.v3.75.fasta	36126.3	1	18	25	200	0.00363	0.458	WFVFQDSATISK	K	A	0.95	3.82	0.376	7.59	0	7	0	0	2	1428.72	229	240
male	carbonic anhydrase VI	IPI00569317	ipi.RAT.v3.75.fasta	36126.3	1	18	25	200	0.00363	0.458	YPSCGGER	K	Q	0.95	2.55	0.0922	1.68	0	1	0	0	2	925.383	38	45
male	carbonic anhydrase VI	IPI00569317	ipi.RAT.v3.75.fasta	36126.3	1	18	25	200	0.00363	0.458	YTGQTTTLR	K	N	0.95	3.55	0.431	4.51	2	15	0	0	2	1040.54	188	196
female	cDNA sequence BC048546	IPI00358444	ipi.RAT.v3.75.fasta	162370	1	7	7	15	0.000351	0.0426	EYIFIEETVPK	K	Q	0.95	3.25	0.287	2.28	0	2	0	0	2	1367.71	1054	1064
female	cDNA sequence BC048546	IPI00358444	ipi.RAT.v3.75.fasta	162370	1	7	7	15	0.000351	0.0426	HDAPDSISHAK	F	V	0.95	3.21	0.331	4.57	0	6	0	0	1	1177.56	716	726
female	cDNA sequence BC048546	IPI00358444	ipi.RAT.v3.75.fasta	162370	1	7	7	15	0.000351	0.0426	KPGDTVHFR	H	V	0.95	2.85	0.278	3.08	0	1	0	0	1	1056.56	131	139
female	cDNA sequence BC048546	IPI00358444	ipi.RAT.v3.75.fasta	162370	1	7	7	15	0.000351	0.0426	KPTSNVWDGDLSNLVR	Y	N	0.95	5.48	0.476	6.19	0	1	0	0	1	1800.92	646	661
female	cDNA sequence BC048546	IPI00358444	ipi.RAT.v3.75.fasta	162370	1	7	7	15	0.000351	0.0426	TLHPSGEIVADSVK	Y	L	0.95	3.79	0.391	5.8	0	3	0	0	1	1452.77	531	544
female	cDNA sequence BC048546	IPI00358444	ipi.RAT.v3.75.fasta	162370	1	7	7	15	0.000351	0.0426	VWDGDLSNLVR	N	N	0.95	2.27	0.221	3.2	0	1	0	0	1	1273.65	651	661
female	cDNA sequence BC048546	IPI00358444	ipi.RAT.v3.75.fasta	162370	1	7	7	15	0.000351	0.0426	YKPTSNVWDGDLSNLVR	Y	N	0.95	4.29	0.4	6.74	0	1	0	0	1	1963.99	645	661
male	cDNA sequence BC048546	IPI00358444	ipi.RAT.v3.75.fasta	162370	1	4	4	8	0.000145	0.046	HDAPDSISHAK	F	V	0.95	3.34	0.318	5.13	0	4	0	0	1	1177.56	716	726
male	cDNA sequence BC048546	IPI00358444	ipi.RAT.v3.75.fasta	162370	1	4	4	8	0.000145	0.046	KNENLVNNAQEDSDEDDIALTAY	R	V	0.95	5.53	0.429	7.19	0	2	0	0	1	2581.15	1082	1104
male	cDNA sequence BC048546	IPI00358444	ipi.RAT.v3.75.fasta	162370	1	4	4	8	0.000145	0.046	QITLELPNDVVEGSAR	K	S	0.95	4.92	0.421	7.36	0	1	0	0	2	1740.91	932	947
male	cDNA sequence BC048546	IPI00358444	ipi.RAT.v3.75.fasta	162370	1	4	4	8	0.000145	0.046	YKPTSNVWDGDLSNLVR	Y	N	0.95	4.26	0.475	7.59	0	1	0	0	1	1963.99	645	661
female	Common salivary protein 1	IPI00204777	ipi.RAT.v3.75.fasta	17621.7	1	18	20	91	0.00213	0.692	ELIIGPLTGR	R	Y	0.95	3.5	0.252	2.52	1	5	0	0	2	1068.64	108	117
female	Common salivary protein 1	IPI00204777	ipi.RAT.v3.75.fasta	17621.7	1	18	20	91	0.00213	0.692	FGNNWSQEYGSSGR	K	A	0.95	4.54	0.38	8.08	0	4	0	0	2	1588.68	59	72
female	Common salivary protein 1	IPI00204777	ipi.RAT.v3.75.fasta	17621.7	1	18	20	91	0.00213	0.692	HFCIVAPEGEPVTGIW	K	A	0.95	4.58	0.475	0	0	35	0	0	1	1811.88	29	44
female	Common salivary protein 1	IPI00204777	ipi.RAT.v3.75.fasta	17621.7	1	18	20	91	0.00213	0.692	HFCIVAPEGEPVTGIWAS	K	L	0.95	4.2	0.443	0	0	1	0	0	1	1969.95	29	46
female	Common salivary protein 1	IPI00204777	ipi.RAT.v3.75.fasta	17621.7	1	18	20	91	0.00213	0.692	HFCIVAPEGEPVTGIWASL	K	K	0.95	3.98	0.47	0	0	3	0	0	1	2083.03	29	47
female	Common salivary protein 1	IPI00204777	ipi.RAT.v3.75.fasta	17621.7	1	18	20	91	0.00213	0.692	HQIIITTSQPR	M	E	0.95	3.49	0.275	5.32	0	3	0	0	1	1293.73	97	107
female	Common salivary protein 1	IPI00204777	ipi.RAT.v3.75.fasta	17621.7	1	18	20	91	0.00213	0.692	IFMHQIIITTSQPR	Y	E	0.95	5.24	0.442	6.8	0	10	0	0	1	1684.92	94	107
female	Common salivary protein 1	IPI00204777	ipi.RAT.v3.75.fasta	17621.7	1	18	20	91	0.00213	0.692	IIITTSQPR	Q	E	0.95	2.68	0.202	1.46	0	2	0	0	1	1028.61	99	107
female	Common salivary protein 1	IPI00204777	ipi.RAT.v3.75.fasta	17621.7	1	18	20	91	0.00213	0.692	KNNILSSIR	L	L	0.95	2.85	0.141	2.05	0	1	0	0	1	1044.62	48	56
female	Common salivary protein 1	IPI00204777	ipi.RAT.v3.75.fasta	17621.7	1	18	20	91	0.00213	0.692	LNPDETVLGFSGSFY	K	I	0.95	4.1	0.448	6.2	0	1	0	0	1	1645.77	79	93
female	Common salivary protein 1	IPI00204777	ipi.RAT.v3.75.fasta	17621.7	1	18	20	91	0.00213	0.692	MHQIIITTSQPR	F	E	0.95	5.23	0.449	6.64	0	4	0	0	1	1424.77	96	107
female	Common salivary protein 1	IPI00204777	ipi.RAT.v3.75.fasta	17621.7	1	18	20	91	0.00213	0.692	NNILSSIR	K	L	0.95	2.52	0.104	1.85	1	0	0	0	2	916.521	49	56
female	Common salivary protein 1	IPI00204777	ipi.RAT.v3.75.fasta	17621.7	1	18	20	91	0.00213	0.692	QIIITTSQPR	H	E	0.95	2.81	0.384	3.09	0	2	0	0	1	1156.67	98	107
female	Common salivary protein 1	IPI00204777	ipi.RAT.v3.75.fasta	17621.7	1	18	20	91	0.00213	0.692	SYPENPNHVFR	T	G	0.95	2.65	0.283	2.49	0	1	0	0	1	1359.64	122	132
female	Common salivary protein 1	IPI00204777	ipi.RAT.v3.75.fasta	17621.7	1	18	20	91	0.00213	0.692	TSYPENPNHVFR	Y	G	0.95	3.26	0.351	4.24	3	9	0	0	1	1460.69	121	132
female	Common salivary protein 1	IPI00204777	ipi.RAT.v3.75.fasta	17621.7	1	18	20	91	0.00213	0.692	VYTSYPENPNHVFR	Y	G	0.95	4.75	0.403	7.6	0	1	0	0	1	1722.82	119	132
female	Common salivary protein 1	IPI00204777	ipi.RAT.v3.75.fasta	17621.7	1	18	20	91	0.00213	0.692	YHGSETGK	R	H	0.95	3.04	0.26	3.36	3	0	0	0	2	878.4	21	28
female	Common salivary protein 1	IPI00204777	ipi.RAT.v3.75.fasta	17621.7	1	18	20	91	0.00213	0.692	YVTGGLK	Y	G	0.95	1.92	0.127	0.721	1	0	0	0	1	737.419	138	144
male	Common salivary protein 1	IPI00204777	ipi.RAT.v3.75.fasta	17621.7	1	13	17	109	0.00198	0.541	ELIIGPLTGR	R	Y	0.95	3.32	0.293	2.85	3	14	0	0	2	1068.64	108	117
male	Common salivary protein 1	IPI00204777	ipi.RAT.v3.75.fasta	17621.7	1	13	17	109	0.00198	0.541	FGNNWSQEY	K	G	0.95	3.01	0.233	2.35	0	1	0	0	1	1144.47	59	67
male	Common salivary protein 1	IPI00204777	ipi.RAT.v3.75.fasta	17621.7	1	13	17	109	0.00198	0.541	HFCIVAPEGEPVTGIW	K	A	0.95	4.32	0.518	0	0	32	0	0	1	1811.88	29	44
male	Common salivary protein 1	IPI00204777	ipi.RAT.v3.75.fasta	17621.7	1	13	17	109	0.00198	0.541	HFCIVAPEGEPVTGIWA	K	S	0.95	3.74	0.231	0	0	2	0	0	1	1882.92	29	45
male	Common salivary protein 1	IPI00204777	ipi.RAT.v3.75.fasta	17621.7	1	13	17	109	0.00198	0.541	HFCIVAPEGEPVTGIWASL	K	K	0.95	3.79	0.417	0	0	4	0	0	1	2083.03	29	47
male	Common salivary protein 1	IPI00204777	ipi.RAT.v3.75.fasta	17621.7	1	13	17	109	0.00198	0.541	HQIIITTSQPR	M	E	0.95	3.27	0.288	6.55	0	1	0	0	1	1293.73	97	107
male	Common salivary protein 1	IPI00204777	ipi.RAT.v3.75.fasta	17621.7	1	13	17	109	0.00198	0.541	IFMHQIIITTSQPR	Y	E	0.95	5.4	0.441	6.33	0	21	1	0	1	1684.92	94	107
male	Common salivary protein 1	IPI00204777	ipi.RAT.v3.75.fasta	17621.7	1	13	17	109	0.00198	0.541	IIITTSQPR	Q	E	0.95	3.08	0.21	2.15	0	6	0	0	1	1028.61	99	107
male	Common salivary protein 1	IPI00204777	ipi.RAT.v3.75.fasta	17621.7	1	13	17	109	0.00198	0.541	LNPDETVLGFSGSFY	K	I	0.95	4.86	0.463	10	0	2	0	0	1	1645.77	79	93
male	Common salivary protein 1	IPI00204777	ipi.RAT.v3.75.fasta	17621.7	1	13	17	109	0.00198	0.541	MHQIIITTSQPR	F	E	0.95	4.28	0.359	0	0	3	0	0	1	1440.76	96	107
male	Common salivary protein 1	IPI00204777	ipi.RAT.v3.75.fasta	17621.7	1	13	17	109	0.00198	0.541	QIIITTSQPR	H	E	0.95	2.84	0.41	2.57	0	3	0	0	1	1156.67	98	107
male	Common salivary protein 1	IPI00204777	ipi.RAT.v3.75.fasta	17621.7	1	13	17	109	0.00198	0.541	TSYPENPNHVFR	Y	G	0.95	3.22	0.384	4.21	3	9	2	0	1	1460.69	121	132
male	Common salivary protein 1	IPI00204777	ipi.RAT.v3.75.fasta	17621.7	1	13	17	109	0.00198	0.541	YVTGGLK	Y	G	0.95	2.03	0.0937	1.77	2	0	0	0	1	737.419	138	144
female	Contiguous repeat polypeptide	IPI00211295	ipi.RAT.v3.75.fasta	26460.3	1	8	12	235	0.00551	0.224	EQPQQTNPEEKPPAPK	Q	T	0.95	4.29	0.402	3.59	0	4	0	0	1	1817.9	190	205	IPI00373414
female	Contiguous repeat polypeptide	IPI00211295	ipi.RAT.v3.75.fasta	26460.3	1	8	12	235	0.00551	0.224	FIANLIPER	P	I	0.95	3.2	0.145	2.39	0	3	0	0	1	1072.62	224	232
female	Contiguous repeat polypeptide	IPI00211295	ipi.RAT.v3.75.fasta	26460.3	1	8	12	235	0.00551	0.224	IANLIPER	F	I	0.95	3.02	0.184	1.47	4	82	0	0	1	925.547	225	232
female	Contiguous repeat polypeptide	IPI00211295	ipi.RAT.v3.75.fasta	26460.3	1	8	12	235	0.00551	0.224	KPLLPF	K	I	0.95	2.32	0.155	0.854	56	0	0	0	1	714.455	219	224
female	Contiguous repeat polypeptide	IPI00211295	ipi.RAT.v3.75.fasta	26460.3	1	8	12	235	0.00551	0.224	KPLLPFIA	K	N	0.95	1.99	0.215	1.03	2	0	0	0	1	898.576	219	226
female	Contiguous repeat polypeptide	IPI00211295	ipi.RAT.v3.75.fasta	26460.3	1	8	12	235	0.00551	0.224	KPLLPFIAN	K	L	0.95	2.91	0.344	3.64	2	13	0	0	1	1012.62	219	227
female	Contiguous repeat polypeptide	IPI00211295	ipi.RAT.v3.75.fasta	26460.3	1	8	12	235	0.00551	0.224	KPLLPFIANLIPER	K	I	0.95	3.45	0.466	5.89	0	26	4	0	2	1620.98	219	232
female	Contiguous repeat polypeptide	IPI00211295	ipi.RAT.v3.75.fasta	26460.3	1	8	12	235	0.00551	0.224	NSQEQPQQTNPEEKPPAPK	E	T	0.95	4.11	0.234	2.31	0	3	0	0	1	2147.04	187	205	IPI00373414
female	Contiguous repeat polypeptide	IPI00211295	ipi.RAT.v3.75.fasta	26460.3	1	8	12	235	0.00551	0.224	PEEKPPAPK	N	T	0.95	3.15	0.307	1.82	0	11	0	0	1	992.541	197	205	IPI00373414
female	Contiguous repeat polypeptide	IPI00211295	ipi.RAT.v3.75.fasta	26460.3	1	8	12	235	0.00551	0.224	PENSQEQPQQTNPEEKPPAPK	S	T	0.95	3.79	0.28	0	0	1	0	0	1	2373.13	185	205	IPI00373414
female	Contiguous repeat polypeptide	IPI00211295	ipi.RAT.v3.75.fasta	26460.3	1	8	12	235	0.00551	0.224	QEQPQQTNPEEKPPAPK	S	T	0.95	3.29	0.358	4.47	0	8	0	0	1	1945.96	189	205	IPI00373414
female	Contiguous repeat polypeptide	IPI00211295	ipi.RAT.v3.75.fasta	26460.3	1	8	12	235	0.00551	0.224	QTNPEEKPPAPK	Q	T	0.95	2.35	0.271	3.74	0	2	0	0	1	1335.69	194	205	IPI00373414
female	Contiguous repeat polypeptide	IPI00211295	ipi.RAT.v3.75.fasta	26460.3	1	8	12	235	0.00551	0.224	SQEQPQQTNPEEKPPAPK	N	T	0.95	4.93	0.395	9.07	0	40	10	0	1	2032.99	188	205	IPI00373414
female	Contiguous repeat polypeptide	IPI00211295	ipi.RAT.v3.75.fasta	26460.3	1	8	12	235	0.00551	0.224	TNPEEKPPAPK	Q	T	0.95	2.59	0.214	2.31	0	6	0	0	1	1207.63	195	205	IPI00373414
female	Contiguous repeat polypeptide	IPI00211295	ipi.RAT.v3.75.fasta	26460.3	1	8	12	235	0.00551	0.224	TQDEPQHDSGR	K	P	0.95	3.6	0.295	5.74	0	3	0	0	1	1269.55	206	216
female	Contiguous repeat polypeptide	IPI00211295	ipi.RAT.v3.75.fasta	26460.3	1	8	12	235	0.00551	0.224	TQDEPQHDSGRPK	K	K	0.95	3.97	0.33	5.57	2	38	0	0	2	1494.69	206	218
female	Contiguous repeat polypeptide	IPI00211295	ipi.RAT.v3.75.fasta	26460.3	1	8	12	235	0.00551	0.224	VESPPSSPENSQEQPQQTNPEEKPPAPK	N	T	0.95	2.16	0.422	10.3	0	0	10	0	1	3056.44	178	205	IPI00373414
male	Contiguous repeat polypeptide	IPI00211295	ipi.RAT.v3.75.fasta	26460.3	1	8	11	280	0.00508	0.224	FIANLIPER	P	I	0.95	3.31	0.153	2.04	0	5	0	0	1	1072.62	224	232
male	Contiguous repeat polypeptide	IPI00211295	ipi.RAT.v3.75.fasta	26460.3	1	8	11	280	0.00508	0.224	IANLIPER	F	I	0.95	3.06	0.21	2.41	6	128	0	0	1	925.547	225	232
male	Contiguous repeat polypeptide	IPI00211295	ipi.RAT.v3.75.fasta	26460.3	1	8	11	280	0.00508	0.224	KPLLPF	K	I	0.95	2.16	0.161	0.886	11	0	0	0	1	714.455	219	224
male	Contiguous repeat polypeptide	IPI00211295	ipi.RAT.v3.75.fasta	26460.3	1	8	11	280	0.00508	0.224	KPLLPFIA	K	N	0.95	2.02	0.238	1.96	4	0	0	0	1	898.576	219	226
male	Contiguous repeat polypeptide	IPI00211295	ipi.RAT.v3.75.fasta	26460.3	1	8	11	280	0.00508	0.224	KPLLPFIAN	K	L	0.95	2.94	0.364	3.04	1	17	0	0	1	1012.62	219	227
male	Contiguous repeat polypeptide	IPI00211295	ipi.RAT.v3.75.fasta	26460.3	1	8	11	280	0.00508	0.224	KPLLPFIANLIPER	K	I	0.95	3.97	0.44	5	0	59	5	0	2	1620.98	219	232
male	Contiguous repeat polypeptide	IPI00211295	ipi.RAT.v3.75.fasta	26460.3	1	8	11	280	0.00508	0.224	SQEQPQQTNPEEKPPAPK	N	T	0.95	4.8	0.427	6.37	0	6	4	0	1	2032.99	188	205	IPI00373414
male	Contiguous repeat polypeptide	IPI00211295	ipi.RAT.v3.75.fasta	26460.3	1	8	11	280	0.00508	0.224	TQDEPQHDSGR	K	P	0.95	3.62	0.3	5.92	0	3	0	0	1	1269.55	206	216
male	Contiguous repeat polypeptide	IPI00211295	ipi.RAT.v3.75.fasta	26460.3	1	8	11	280	0.00508	0.224	TQDEPQHDSGRPK	K	K	0.95	3.88	0.372	5.21	0	41	0	0	2	1494.69	206	218
male	Contiguous repeat polypeptide	IPI00211295	ipi.RAT.v3.75.fasta	26460.3	1	8	11	280	0.00508	0.224	VESPPSSPENSQEQPQQTNPEEKPPAPK	N	T	0.95	2.19	0.116	4.68	0	0	2	0	1	3056.44	178	205	IPI00373414
female	Cysteine-rich secretory protein 1	IPI00193789	ipi.RAT.v3.75.fasta	27829.1	1	22	30	148	0.00347	0.439	ACGVAECPDQPLK	V	Y	0.95	4.72	0.38	0	0	1	0	0	1	1444.66	153	165
female	Cysteine-rich secretory protein 1	IPI00193789	ipi.RAT.v3.75.fasta	27829.1	1	22	30	148	0.00347	0.439	CGVAECPDQPLK	A	Y	0.95	3.82	0.292	0	0	2	0	0	1	1373.62	154	165
female	Cysteine-rich secretory protein 1	IPI00193789	ipi.RAT.v3.75.fasta	27829.1	1	22	30	148	0.00347	0.439	CIYNHSPLQHR	R	T	0.95	0	0	4.24	0	1	0	0	2	1424.69	82	92
female	Cysteine-rich secretory protein 1	IPI00193789	ipi.RAT.v3.75.fasta	27829.1	1	22	30	148	0.00347	0.439	DEWDRDLENLSTTK	T	L	0.95	4.23	0.228	8.15	0	2	0	0	1	1721.8	24	37
female	Cysteine-rich secretory protein 1	IPI00193789	ipi.RAT.v3.75.fasta	27829.1	1	22	30	148	0.00347	0.439	DLENLSTTK	R	L	0.95	3.05	0.185	2.74	1	3	0	0	2	1020.52	29	37
female	Cysteine-rich secretory protein 1	IPI00193789	ipi.RAT.v3.75.fasta	27829.1	1	22	30	148	0.00347	0.439	DNYSNCGDLKK	E	M	0.95	3.13	0.197	0	0	1	0	0	1	1313.58	212	222
female	Cysteine-rich secretory protein 1	IPI00193789	ipi.RAT.v3.75.fasta	27829.1	1	22	30	148	0.00347	0.439	EDNYSNCGDLKK	Y	M	0.95	3.06	0.249	0	0	2	0	0	1	1442.62	211	222
female	Cysteine-rich secretory protein 1	IPI00193789	ipi.RAT.v3.75.fasta	27829.1	1	22	30	148	0.00347	0.439	IYNHSPLQHR	C	T	0.95	2.75	0.14	1.42	0	1	0	0	1	1264.65	83	92
female	Cysteine-rich secretory protein 1	IPI00193789	ipi.RAT.v3.75.fasta	27829.1	1	22	30	148	0.00347	0.439	KMVSCDDPLLK	K	E	0.95	3.38	0.232	7.15	0	4	0	0	2	1305.65	222	232
female	Cysteine-rich secretory protein 1	IPI00193789	ipi.RAT.v3.75.fasta	27829.1	1	22	30	148	0.00347	0.439	LSVQEEIINK	K	H	0.95	3.97	0.287	4.68	2	21	0	0	2	1172.65	38	47
female	Cysteine-rich secretory protein 1	IPI00193789	ipi.RAT.v3.75.fasta	27829.1	1	22	30	148	0.00347	0.439	LVACGVAECPDQPLK	F	Y	0.95	4.83	0.385	0	0	3	0	0	1	1656.81	151	165
female	Cysteine-rich secretory protein 1	IPI00193789	ipi.RAT.v3.75.fasta	27829.1	1	22	30	148	0.00347	0.439	MVSCDDPLLK	K	E	0.95	2.84	0.391	2.72	1	3	0	0	2	1177.56	223	232
female	Cysteine-rich secretory protein 1	IPI00193789	ipi.RAT.v3.75.fasta	27829.1	1	22	30	148	0.00347	0.439	NHSPLQHR	Y	T	0.95	2.22	0.283	1.05	4	1	0	0	1	988.507	85	92
female	Cysteine-rich secretory protein 1	IPI00193789	ipi.RAT.v3.75.fasta	27829.1	1	22	30	148	0.00347	0.439	QDTTDEWDRDLENLSTTK	L	L	0.95	0	0	8.23	0	14	0	0	1	2149.95	20	37
female	Cysteine-rich secretory protein 1	IPI00193789	ipi.RAT.v3.75.fasta	27829.1	1	22	30	148	0.00347	0.439	RDLENLSTTK	D	L	0.95	3.94	0.315	0	0	4	0	0	1	1176.62	28	37
female	Cysteine-rich secretory protein 1	IPI00193789	ipi.RAT.v3.75.fasta	27829.1	1	22	30	148	0.00347	0.439	RTVSPSGSDLLR	R	V	0.95	3.56	0.274	1.89	1	4	2	0	2	1287.7	53	64
female	Cysteine-rich secretory protein 1	IPI00193789	ipi.RAT.v3.75.fasta	27829.1	1	22	30	148	0.00347	0.439	TVSPSGSDLLR	R	V	0.95	2.21	0.15	4.31	1	13	0	0	2	1131.6	54	64
female	Cysteine-rich secretory protein 1	IPI00193789	ipi.RAT.v3.75.fasta	27829.1	1	22	30	148	0.00347	0.439	VACGVAECPDQPLK	L	Y	0.95	4.59	0.338	0	0	10	0	0	1	1543.72	152	165
female	Cysteine-rich secretory protein 1	IPI00193789	ipi.RAT.v3.75.fasta	27829.1	1	22	30	148	0.00347	0.439	VEWDHDAY	R	V	0.95	2.92	0.332	1.46	8	30	0	0	1	1034.42	65	72
female	Cysteine-rich secretory protein 1	IPI00193789	ipi.RAT.v3.75.fasta	27829.1	1	22	30	148	0.00347	0.439	VEWDHDAYVN	R	A	0.95	2.79	0.351	2.59	0	1	0	0	1	1247.53	65	74
female	Cysteine-rich secretory protein 1	IPI00193789	ipi.RAT.v3.75.fasta	27829.1	1	22	30	148	0.00347	0.439	VEWDHDAYVNAQK	R	W	0.95	4.65	0.36	6.68	0	3	0	0	2	1574.72	65	77
female	Cysteine-rich secretory protein 1	IPI00193789	ipi.RAT.v3.75.fasta	27829.1	1	22	30	148	0.00347	0.439	VFGFGPK	F	K	0.95	1.93	0.189	0.921	4	0	0	0	1	751.414	126	132
male	Cysteine-rich secretory protein 1	IPI00193789	ipi.RAT.v3.75.fasta	27829.1	1	15	21	372	0.00675	0.358	ACGVAECPDQPLK	V	Y	0.95	4.68	0.361	0	0	2	0	0	1	1444.66	153	165
male	Cysteine-rich secretory protein 1	IPI00193789	ipi.RAT.v3.75.fasta	27829.1	1	15	21	372	0.00675	0.358	DLENLSTTK	R	L	0.95	3.01	0.184	1.6	23	22	0	0	2	1020.52	29	37
male	Cysteine-rich secretory protein 1	IPI00193789	ipi.RAT.v3.75.fasta	27829.1	1	15	21	372	0.00675	0.358	LSVQEEIINK	K	H	0.95	4.08	0.284	3.48	5	51	0	0	2	1172.65	38	47
male	Cysteine-rich secretory protein 1	IPI00193789	ipi.RAT.v3.75.fasta	27829.1	1	15	21	372	0.00675	0.358	LVACGVAECPDQPLK	F	Y	0.95	4.73	0.445	0	0	7	0	0	1	1656.81	151	165
male	Cysteine-rich secretory protein 1	IPI00193789	ipi.RAT.v3.75.fasta	27829.1	1	15	21	372	0.00675	0.358	MVSCDDPLLK	K	E	0.95	2.92	0.399	2.82	3	7	0	0	2	1177.56	223	232
male	Cysteine-rich secretory protein 1	IPI00193789	ipi.RAT.v3.75.fasta	27829.1	1	15	21	372	0.00675	0.358	NHSPLQHR	Y	T	0.95	2.32	0.157	1.42	1	0	0	0	1	988.507	85	92
male	Cysteine-rich secretory protein 1	IPI00193789	ipi.RAT.v3.75.fasta	27829.1	1	15	21	372	0.00675	0.358	QDTTDEWDRDLENLSTTK	L	L	0.95	4.37	0.431	1.96	0	22	1	0	1	2166.98	20	37
male	Cysteine-rich secretory protein 1	IPI00193789	ipi.RAT.v3.75.fasta	27829.1	1	15	21	372	0.00675	0.358	RDLENLSTTK	D	L	0.95	3.88	0.292	0	0	3	0	0	1	1176.62	28	37
male	Cysteine-rich secretory protein 1	IPI00193789	ipi.RAT.v3.75.fasta	27829.1	1	15	21	372	0.00675	0.358	RTVSPSGSDLLR	R	V	0.95	3.71	0.32	3	0	8	0	0	2	1287.7	53	64
male	Cysteine-rich secretory protein 1	IPI00193789	ipi.RAT.v3.75.fasta	27829.1	1	15	21	372	0.00675	0.358	SPSGSDLLR	V	V	0.95	1.98	0.206	0.886	1	0	0	0	1	931.484	56	64
male	Cysteine-rich secretory protein 1	IPI00193789	ipi.RAT.v3.75.fasta	27829.1	1	15	21	372	0.00675	0.358	SVQEEIINK	L	H	0.95	2.91	0.117	3.85	0	7	0	0	1	1059.57	39	47
male	Cysteine-rich secretory protein 1	IPI00193789	ipi.RAT.v3.75.fasta	27829.1	1	15	21	372	0.00675	0.358	TVSPSGSDLLR	R	V	0.95	2.18	0.144	4.32	11	56	0	0	2	1131.6	54	64
male	Cysteine-rich secretory protein 1	IPI00193789	ipi.RAT.v3.75.fasta	27829.1	1	15	21	372	0.00675	0.358	VACGVAECPDQPLK	L	Y	0.95	4.7	0.35	0	0	109	0	0	1	1543.72	152	165
male	Cysteine-rich secretory protein 1	IPI00193789	ipi.RAT.v3.75.fasta	27829.1	1	15	21	372	0.00675	0.358	VEWDHDAY	R	V	0.95	2.9	0.355	1.36	12	12	0	0	1	1034.42	65	72
male	Cysteine-rich secretory protein 1	IPI00193789	ipi.RAT.v3.75.fasta	27829.1	1	15	21	372	0.00675	0.358	VFGFGPK	F	K	0.95	2.02	0.226	0.921	9	0	0	0	1	751.414	126	132
female	Deoxyribonuclease-1	IPI00230876	ipi.RAT.v3.75.fasta	32047.2	1	30	40	312	0.00731	0.447	AEAISDHYPVEVTLR	M	K	0.95	4.49	0.332	3.17	0	4	1	0	1	1699.87	268	282
female	Deoxyribonuclease-1	IPI00230876	ipi.RAT.v3.75.fasta	32047.2	1	30	40	312	0.00731	0.447	DFQAEYR	F	L	0.95	2.49	0.33	0	21	0	0	0	1	928.416	256	262
female	Deoxyribonuclease-1	IPI00230876	ipi.RAT.v3.75.fasta	32047.2	1	30	40	312	0.00731	0.447	DTHLVAVGK	R	L	0.95	2.8	0.244	2.38	25	12	0	0	2	939.526	64	72
female	Deoxyribonuclease-1	IPI00230876	ipi.RAT.v3.75.fasta	32047.2	1	30	40	312	0.00731	0.447	DTHLVAVGKLLDELNRD	R	I	0.95	4.24	0.309	0	0	3	0	0	1	1908.02	64	80
female	Deoxyribonuclease-1	IPI00230876	ipi.RAT.v3.75.fasta	32047.2	1	30	40	312	0.00731	0.447	DTTATSTHCAYDR	A	I	0.95	4.05	0.478	0	0	1	0	0	1	1498.62	223	235
female	Deoxyribonuclease-1	IPI00230876	ipi.RAT.v3.75.fasta	32047.2	1	30	40	312	0.00731	0.447	EFAIVPLHSAPTEAVSEIDAL	R	Y	0.95	4.01	0.344	8.12	0	1	0	0	1	2209.14	149	169
female	Deoxyribonuclease-1	IPI00230876	ipi.RAT.v3.75.fasta	32047.2	1	30	40	312	0.00731	0.447	EFAIVPLHSAPTEAVSEIDALY	R	D	0.95	4.97	0.544	0	0	39	1	0	1	2372.2	149	170
female	Deoxyribonuclease-1	IPI00230876	ipi.RAT.v3.75.fasta	32047.2	1	30	40	312	0.00731	0.447	HSAPTEAVSEIDALYDVYLDVR	L	Q	0.95	1.81	0	3	0	0	1	0	1	2463.2	156	177
female	Deoxyribonuclease-1	IPI00230876	ipi.RAT.v3.75.fasta	32047.2	1	30	40	312	0.00731	0.447	IPDSADTTATSTHCAYDR	L	I	0.95	5.58	0.531	0	0	5	0	0	1	1981.86	218	235
female	Deoxyribonuclease-1	IPI00230876	ipi.RAT.v3.75.fasta	32047.2	1	30	40	312	0.00731	0.447	ISDHYPVEVTLR	A	K	0.95	3.28	0.301	1.82	0	2	0	0	1	1428.75	271	282
female	Deoxyribonuclease-1	IPI00230876	ipi.RAT.v3.75.fasta	32047.2	1	30	40	312	0.00731	0.447	LIPDSADTTATSTHCAYDR	W	I	0.95	4.74	0.499	0	0	2	0	0	1	2094.94	217	235
female	Deoxyribonuclease-1	IPI00230876	ipi.RAT.v3.75.fasta	32047.2	1	30	40	312	0.00731	0.447	LTNQMAEAISDHYPVEVTL	R	R	0.95	4.96	0.391	4.74	0	1	0	0	1	2131.04	263	281
female	Deoxyribonuclease-1	IPI00230876	ipi.RAT.v3.75.fasta	32047.2	1	30	40	312	0.00731	0.447	LTNQMAEAISDHYPVEVTLR	R	K	0.95	6.02	0.53	8.51	0	30	17	0	2	2287.14	263	282
female	Deoxyribonuclease-1	IPI00230876	ipi.RAT.v3.75.fasta	32047.2	1	30	40	312	0.00731	0.447	MAEAISDHYPVEVTLR	Q	K	0.95	4.7	0.445	0	0	1	0	0	1	1846.9	267	282
female	Deoxyribonuclease-1	IPI00230876	ipi.RAT.v3.75.fasta	32047.2	1	30	40	312	0.00731	0.447	PDSADTTATSTHCAYDR	I	I	0.95	4.91	0.447	0	0	1	0	0	1	1868.77	219	235
female	Deoxyribonuclease-1	IPI00230876	ipi.RAT.v3.75.fasta	32047.2	1	30	40	312	0.00731	0.447	QMAEAISDHYPVEVTLR	N	K	0.95	0	0	5.57	0	1	0	0	1	1941.94	266	282
female	Deoxyribonuclease-1	IPI00230876	ipi.RAT.v3.75.fasta	32047.2	1	30	40	312	0.00731	0.447	RLTNQMAEAISDHYPVEVTLR	Y	K	0.95	5.42	0.439	3.39	0	0	3	0	1	2443.24	262	282
female	Deoxyribonuclease-1	IPI00230876	ipi.RAT.v3.75.fasta	32047.2	1	30	40	312	0.00731	0.447	RYIISEPLGR	Y	K	0.95	3.5	0.225	1.89	0	2	0	0	1	1203.68	86	95
female	Deoxyribonuclease-1	IPI00230876	ipi.RAT.v3.75.fasta	32047.2	1	30	40	312	0.00731	0.447	SADTTATSTHCAYDR	D	I	0.95	4.97	0.47	0	0	2	0	0	1	1656.69	221	235
female	Deoxyribonuclease-1	IPI00230876	ipi.RAT.v3.75.fasta	32047.2	1	30	40	312	0.00731	0.447	SYKEQYLF	K	V	0.95	2.96	0.267	1.44	0	6	0	0	1	1077.53	97	104
female	Deoxyribonuclease-1	IPI00230876	ipi.RAT.v3.75.fasta	32047.2	1	30	40	312	0.00731	0.447	THLVAVGK	D	L	0.95	2.52	0.261	3.16	3	2	0	0	1	824.499	65	72
female	Deoxyribonuclease-1	IPI00230876	ipi.RAT.v3.75.fasta	32047.2	1	30	40	312	0.00731	0.447	TNQMAEAISDHYPVEVTLR	L	K	0.95	6.35	0.481	8.02	0	2	2	0	1	2174.05	264	282
female	Deoxyribonuclease-1	IPI00230876	ipi.RAT.v3.75.fasta	32047.2	1	30	40	312	0.00731	0.447	TSPIFQWLIPDSADTTATSTH	R	C	0.95	5.63	0.539	7.12	0	25	3	0	1	2289.1	210	230
female	Deoxyribonuclease-1	IPI00230876	ipi.RAT.v3.75.fasta	32047.2	1	30	40	312	0.00731	0.447	TSPIFQWLIPDSADTTATSTHC	R	A	0.95	5.27	0.489	0	0	3	0	0	1	2449.13	210	231
female	Deoxyribonuclease-1	IPI00230876	ipi.RAT.v3.75.fasta	32047.2	1	30	40	312	0.00731	0.447	TSPIFQWLIPDSADTTATSTHCAY	R	D	0.95	4.12	0.463	0	0	2	0	0	1	2683.23	210	233
female	Deoxyribonuclease-1	IPI00230876	ipi.RAT.v3.75.fasta	32047.2	1	30	40	312	0.00731	0.447	TSPIFQWLIPDSADTTATSTHCAYDR	R	I	0.95	3.72	0.448	4.92	0	3	1	0	2	2954.36	210	235
female	Deoxyribonuclease-1	IPI00230876	ipi.RAT.v3.75.fasta	32047.2	1	30	40	312	0.00731	0.447	TTATSTHCAYDR	D	I	0.95	3.82	0.34	0	0	3	0	0	1	1383.6	224	235
female	Deoxyribonuclease-1	IPI00230876	ipi.RAT.v3.75.fasta	32047.2	1	30	40	312	0.00731	0.447	WLIPDSADTTATSTHCAYDR	Q	I	0.95	4.44	0.458	0	0	1	0	0	1	2281.02	216	235
female	Deoxyribonuclease-1	IPI00230876	ipi.RAT.v3.75.fasta	32047.2	1	30	40	312	0.00731	0.447	YDIAVVQEVR	R	D	0.95	4.32	0.378	4.38	3	49	0	0	2	1191.64	54	63
female	Deoxyribonuclease-1	IPI00230876	ipi.RAT.v3.75.fasta	32047.2	1	30	40	312	0.00731	0.447	YIISEPLGR	R	K	0.95	2.83	0.333	3.42	8	20	0	0	2	1047.58	87	95
male	Deoxyribonuclease-1	IPI00230876	ipi.RAT.v3.75.fasta	32047.2	1	18	24	361	0.00655	0.366	ADTTATSTHCAYDR	S	I	0.95	3.55	0.309	0	0	2	0	0	1	1569.66	222	235
male	Deoxyribonuclease-1	IPI00230876	ipi.RAT.v3.75.fasta	32047.2	1	18	24	361	0.00655	0.366	AEAISDHYPVEVTLR	M	K	0.95	2.79	0.324	0	0	1	0	0	1	1699.87	268	282
male	Deoxyribonuclease-1	IPI00230876	ipi.RAT.v3.75.fasta	32047.2	1	18	24	361	0.00655	0.366	DTHLVAVGK	R	L	0.95	2.95	0.207	2.8	8	7	0	0	2	939.526	64	72
male	Deoxyribonuclease-1	IPI00230876	ipi.RAT.v3.75.fasta	32047.2	1	18	24	361	0.00655	0.366	DTHLVAVGKLLDELNRD	R	I	0.95	3.58	0.242	0	0	2	0	0	1	1908.02	64	80
male	Deoxyribonuclease-1	IPI00230876	ipi.RAT.v3.75.fasta	32047.2	1	18	24	361	0.00655	0.366	EFAIVPLHSAPTEAVSEIDAL	R	Y	0.95	4.74	0.433	8.4	0	4	0	0	1	2209.14	149	169
male	Deoxyribonuclease-1	IPI00230876	ipi.RAT.v3.75.fasta	32047.2	1	18	24	361	0.00655	0.366	EFAIVPLHSAPTEAVSEIDALY	R	D	0.95	3.1	0.52	3.41	0	119	3	0	1	2372.2	149	170
male	Deoxyribonuclease-1	IPI00230876	ipi.RAT.v3.75.fasta	32047.2	1	18	24	361	0.00655	0.366	IPDSADTTATSTHCAYDR	L	I	0.95	4.73	0.48	0	0	5	0	0	1	1981.86	218	235
male	Deoxyribonuclease-1	IPI00230876	ipi.RAT.v3.75.fasta	32047.2	1	18	24	361	0.00655	0.366	LIPDSADTTATSTHCAYDR	W	I	0.95	4.75	0.52	0	0	1	0	0	1	2094.94	217	235
male	Deoxyribonuclease-1	IPI00230876	ipi.RAT.v3.75.fasta	32047.2	1	18	24	361	0.00655	0.366	LTNQMAEAISDHYPVEVTLR	R	K	0.95	6.2	0.518	8.89	0	13	20	0	2	2287.14	263	282
male	Deoxyribonuclease-1	IPI00230876	ipi.RAT.v3.75.fasta	32047.2	1	18	24	361	0.00655	0.366	PDSADTTATSTHCAYDR	I	I	0.95	3.56	0.351	0	0	2	0	0	1	1868.77	219	235
male	Deoxyribonuclease-1	IPI00230876	ipi.RAT.v3.75.fasta	32047.2	1	18	24	361	0.00655	0.366	QMAEAISDHYPVEVTLR	N	K	0.95	0	0	3.7	0	1	0	0	1	1941.94	266	282
male	Deoxyribonuclease-1	IPI00230876	ipi.RAT.v3.75.fasta	32047.2	1	18	24	361	0.00655	0.366	TSPIFQWLIPDSADTTATSTH	R	C	0.95	5.68	0.554	8.22	0	17	8	0	1	2289.1	210	230
male	Deoxyribonuclease-1	IPI00230876	ipi.RAT.v3.75.fasta	32047.2	1	18	24	361	0.00655	0.366	TSPIFQWLIPDSADTTATSTHC	R	A	0.95	4.94	0.499	0	0	7	0	0	1	2449.13	210	231
male	Deoxyribonuclease-1	IPI00230876	ipi.RAT.v3.75.fasta	32047.2	1	18	24	361	0.00655	0.366	TSPIFQWLIPDSADTTATSTHCAY	R	D	0.95	4.25	0.468	0	0	11	0	0	1	2683.23	210	233
male	Deoxyribonuclease-1	IPI00230876	ipi.RAT.v3.75.fasta	32047.2	1	18	24	361	0.00655	0.366	TSPIFQWLIPDSADTTATSTHCAYD	R	R	0.95	3.89	0.216	0	0	1	0	0	1	2741.24	210	234
male	Deoxyribonuclease-1	IPI00230876	ipi.RAT.v3.75.fasta	32047.2	1	18	24	361	0.00655	0.366	TSPIFQWLIPDSADTTATSTHCAYDR	R	I	0.95	3.29	0.224	8.96	0	10	0	0	2	2954.36	210	235
male	Deoxyribonuclease-1	IPI00230876	ipi.RAT.v3.75.fasta	32047.2	1	18	24	361	0.00655	0.366	YDIAVVQEVR	R	D	0.95	4.41	0.372	5.07	8	89	0	0	2	1191.64	54	63
male	Deoxyribonuclease-1	IPI00230876	ipi.RAT.v3.75.fasta	32047.2	1	18	24	361	0.00655	0.366	YIISEPLGR	R	K	0.95	3.16	0.381	2.7	11	11	0	0	2	1047.58	87	95
female	hemoglobin alpha 2 chain	IPI00205036	ipi.RAT.v3.75.fasta	15266.6	1	6	6	13	0.000305	0.408	AADHVEDLPGALSTLSDLHAHK	K	L	0.95	6.83	0.442	9.33	0	0	3	0	2	2297.15	70	91
female	hemoglobin alpha 2 chain	IPI00205036	ipi.RAT.v3.75.fasta	15266.6	1	6	6	13	0.000305	0.408	IGGHGGEYGEEALQR	K	M	0.95	4.77	0.388	6.51	0	2	0	0	2	1572.74	18	32
female	hemoglobin alpha 2 chain	IPI00205036	ipi.RAT.v3.75.fasta	15266.6	1	6	6	13	0.000305	0.408	KVADALAK	K	A	0.95	2.83	0.207	0.824	1	0	0	0	2	815.499	62	69
female	hemoglobin alpha 2 chain	IPI00205036	ipi.RAT.v3.75.fasta	15266.6	1	6	6	13	0.000305	0.408	SHIDVSPGSAQVK	F	A	0.95	3.78	0.388	6.46	0	3	0	0	1	1324.69	45	57
female	hemoglobin alpha 2 chain	IPI00205036	ipi.RAT.v3.75.fasta	15266.6	1	6	6	13	0.000305	0.408	STLSDLHAHK	L	L	0.95	3.31	0.369	5.42	0	3	0	0	1	1108.57	82	91
female	hemoglobin alpha 2 chain	IPI00205036	ipi.RAT.v3.75.fasta	15266.6	1	6	6	13	0.000305	0.408	TLSDLHAHK	S	L	0.95	2.83	0.217	0	0	1	0	0	1	1021.54	83	91
male	hemoglobin alpha 2 chain	IPI00205036	ipi.RAT.v3.75.fasta	15266.6	1	4	4	5	9.07e-05	0.352	AADHVEDLPGALSTLSDLHAHK	K	L	0.95	4.76	0.262	3.74	0	0	1	0	2	2297.15	70	91
male	hemoglobin alpha 2 chain	IPI00205036	ipi.RAT.v3.75.fasta	15266.6	1	4	4	5	9.07e-05	0.352	IGGHGGEYGEEALQR	K	M	0.95	4.17	0.394	6	0	1	0	0	2	1572.74	18	32
male	hemoglobin alpha 2 chain	IPI00205036	ipi.RAT.v3.75.fasta	15266.6	1	4	4	5	9.07e-05	0.352	SHIDVSPGSAQVK	F	A	0.95	3.8	0.366	4.64	0	1	0	0	1	1324.69	45	57
male	hemoglobin alpha 2 chain	IPI00205036	ipi.RAT.v3.75.fasta	15266.6	1	4	4	5	9.07e-05	0.352	STLSDLHAHK	L	L	0.95	3.11	0.295	4.26	0	2	0	0	1	1108.57	82	91
female	hypothetical protein, partial	IPI00957397	ipi.RAT.v3.75.fasta	11517.7	1	6	8	182	0.00426	0.155	EEDKKPNPILALIELAK	K	K	0.95	2.23	0.356	4.46	0	2	0	0	2	1921.1	85	101
female	hypothetical protein, partial	IPI00957397	ipi.RAT.v3.75.fasta	11517.7	1	6	8	182	0.00426	0.155	KKPNPILALIELAK	D	K	0.95	0	0	7.8	0	8	1	0	1	1547.99	88	101
female	hypothetical protein, partial	IPI00957397	ipi.RAT.v3.75.fasta	11517.7	1	6	8	182	0.00426	0.155	KPNPILALIELA	K	K	0.95	2.91	0.165	0	0	1	0	0	1	1291.8	89	100
female	hypothetical protein, partial	IPI00957397	ipi.RAT.v3.75.fasta	11517.7	1	6	8	182	0.00426	0.155	KPNPILALIELAK	K	K	0.95	4.53	0.398	7.05	0	146	4	0	2	1419.89	89	101
female	hypothetical protein, partial	IPI00957397	ipi.RAT.v3.75.fasta	11517.7	1	6	8	182	0.00426	0.155	NPILALIELAK	P	K	0.95	3.54	0.175	6.68	0	13	0	0	1	1194.75	91	101
female	hypothetical protein, partial	IPI00957397	ipi.RAT.v3.75.fasta	11517.7	1	6	8	182	0.00426	0.155	PILALIELAK	N	K	0.95	3.42	0.332	3.6	0	7	0	0	1	1080.7	92	101
male	hypothetical protein, partial	IPI00957397	ipi.RAT.v3.75.fasta	11517.7	1	4	7	149	0.0027	0.127	KKPNPILALIELAK	D	K	0.95	0	0	6.18	0	5	2	0	1	1547.99	88	101
male	hypothetical protein, partial	IPI00957397	ipi.RAT.v3.75.fasta	11517.7	1	4	7	149	0.0027	0.127	KPNPILALIELAK	K	K	0.95	4.19	0.441	7.89	0	123	6	0	2	1419.89	89	101
male	hypothetical protein, partial	IPI00957397	ipi.RAT.v3.75.fasta	11517.7	1	4	7	149	0.0027	0.127	NPILALIELAK	P	K	0.95	3.88	0.351	4.46	0	5	0	0	1	1194.75	91	101
male	hypothetical protein, partial	IPI00957397	ipi.RAT.v3.75.fasta	11517.7	1	4	7	149	0.0027	0.127	PILALIELAK	N	K	0.95	3.55	0.35	2.92	2	6	0	0	1	1080.7	92	101
female	IQ motif containing GTPase activating protein 1	IPI00365769	ipi.RAT.v3.75.fasta	188820	0.998	2	2	6	0.000141	0.0223	QIPAITCIQSQWRGYKQ	K	K	0.95	3.35	0.184	0	0	3	0	0	1	2020.04	775	791
female	IQ motif containing GTPase activating protein 1	IPI00365769	ipi.RAT.v3.75.fasta	188820	0.998	2	2	6	0.000141	0.0223	VNTSSALANINLALEQGCAL	K	T	0.95	3.95	0.212	0	0	3	0	0	1	2002.03	303	322
female	Isoform 5-HT4L of 5-hydroxytryptamine receptor 4	IPI00208196	ipi.RAT.v3.75.fasta	46089.8	0.998	2	2	3	7.03e-05	0.0468	MTPLRIALMLGGCWVIPM	K	F	0.95	3	0.317	0	0	1	0	0	1	2002.05	133	150
female	Isoform 5-HT4L of 5-hydroxytryptamine receptor 4	IPI00208196	ipi.RAT.v3.75.fasta	46089.8	0.998	2	2	3	7.03e-05	0.0468	MTPLRIALMLGGCWVIPMF	K	I	0.95	3.01	0.213	0	0	2	0	0	1	2149.12	133	151
female	kallikrein 1-related peptidase b3	IPI00231193	ipi.RAT.v3.75.fasta	29262.4	1	2	2	4	9.37e-05	0.083	GFNPCGEPK	W	K	0.95	2.58	0.285	0	0	3	0	0	1	1005.45	234	242
female	kallikrein 1-related peptidase b3	IPI00231193	ipi.RAT.v3.75.fasta	29262.4	1	2	2	4	9.37e-05	0.083	HLSQPADITDGVK	L	V	0.95	3.73	0.419	7.6	0	1	0	0	1	1380.71	129	141
male	kallikrein 1-related peptidase b3	IPI00231193	ipi.RAT.v3.75.fasta	29262.4	0.998	2	2	5	9.07e-05	0.0868	HLSQPADITDGVK	L	V	0.95	3.99	0.34	8.64	0	4	0	0	1	1380.71	129	141
male	kallikrein 1-related peptidase b3	IPI00231193	ipi.RAT.v3.75.fasta	29262.4	0.998	2	2	5	9.07e-05	0.0868	VIDLPIEEPK	K	V	0.95	2.82	0.24	3.59	0	1	0	0	2	1152.65	142	151
female	Long palate, lung and nasal epithelium carcinoma-associated protein 1	IPI00780659	ipi.RAT.v3.75.fasta	52203.2	1	11	13	50	0.00117	0.219	ALENHDATAILQELPLLR	Q	G	0.95	4.88	0.402	9.28	0	1	0	0	1	2017.11	40	57
female	Long palate, lung and nasal epithelium carcinoma-associated protein 1	IPI00780659	ipi.RAT.v3.75.fasta	52203.2	1	11	13	50	0.00117	0.219	ENHDATAILQELPLLR	L	G	0.95	4.31	0.374	7.19	0	2	0	0	1	1832.99	42	57
female	Long palate, lung and nasal epithelium carcinoma-associated protein 1	IPI00780659	ipi.RAT.v3.75.fasta	52203.2	1	11	13	50	0.00117	0.219	HLTQALENHDATAIL	K	Q	0.95	3.32	0.511	5	0	2	0	0	1	1646.85	36	50
female	Long palate, lung and nasal epithelium carcinoma-associated protein 1	IPI00780659	ipi.RAT.v3.75.fasta	52203.2	1	11	13	50	0.00117	0.219	HLTQALENHDATAILQELPLLR	K	G	0.95	4.06	0.572	9.21	0	5	24	0	2	2496.36	36	57
female	Long palate, lung and nasal epithelium carcinoma-associated protein 1	IPI00780659	ipi.RAT.v3.75.fasta	52203.2	1	11	13	50	0.00117	0.219	IFTHSTPH	K	I	0.95	2.84	0.325	4.96	0	3	0	0	1	939.468	336	343
female	Long palate, lung and nasal epithelium carcinoma-associated protein 1	IPI00780659	ipi.RAT.v3.75.fasta	52203.2	1	11	13	50	0.00117	0.219	IFTHSTPHIVLNEGGATAAQSVVL	K	E	0.95	3.16	0.422	8.14	0	2	1	0	1	2462.3	336	359
female	Long palate, lung and nasal epithelium carcinoma-associated protein 1	IPI00780659	ipi.RAT.v3.75.fasta	52203.2	1	11	13	50	0.00117	0.219	IPLDMVAGLNTPLIK	R	T	0.95	4.29	0.323	4.08	0	1	0	0	2	1594.92	108	122
female	Long palate, lung and nasal epithelium carcinoma-associated protein 1	IPI00780659	ipi.RAT.v3.75.fasta	52203.2	1	11	13	50	0.00117	0.219	LFDPEVLKDTLTK	K	I	0.95	3.36	0.312	4.7	0	2	0	0	2	1518.84	412	424
female	Long palate, lung and nasal epithelium carcinoma-associated protein 1	IPI00780659	ipi.RAT.v3.75.fasta	52203.2	1	11	13	50	0.00117	0.219	NHDATAILQELPLLR	E	G	0.95	1.8	0.168	4.39	0	4	0	0	1	1703.94	43	57
female	Long palate, lung and nasal epithelium carcinoma-associated protein 1	IPI00780659	ipi.RAT.v3.75.fasta	52203.2	1	11	13	50	0.00117	0.219	SGSIPILDSFVNTVLR	K	Y	0.95	4.39	0.33	3.59	0	1	0	0	2	1717.95	63	78
female	Long palate, lung and nasal epithelium carcinoma-associated protein 1	IPI00780659	ipi.RAT.v3.75.fasta	52203.2	1	11	13	50	0.00117	0.219	TLIPQEELVILLR	T	F	0.95	2.57	0.152	5.24	0	2	0	0	1	1536.94	291	303
male	Long palate, lung and nasal epithelium carcinoma-associated protein 1	IPI00780659	ipi.RAT.v3.75.fasta	52203.2	1	11	12	125	0.00227	0.28	ALENHDATAILQELPLLR	Q	G	0.95	3.68	0.116	7.74	0	3	0	0	1	2017.11	40	57
male	Long palate, lung and nasal epithelium carcinoma-associated protein 1	IPI00780659	ipi.RAT.v3.75.fasta	52203.2	1	11	12	125	0.00227	0.28	HLTQALENHDATAIL	K	Q	0.95	2.73	0.283	0	0	1	0	0	1	1646.85	36	50
male	Long palate, lung and nasal epithelium carcinoma-associated protein 1	IPI00780659	ipi.RAT.v3.75.fasta	52203.2	1	11	12	125	0.00227	0.28	HLTQALENHDATAILQELPLLR	K	G	0.95	4.15	0.435	5.52	0	0	55	0	2	2496.36	36	57
male	Long palate, lung and nasal epithelium carcinoma-associated protein 1	IPI00780659	ipi.RAT.v3.75.fasta	52203.2	1	11	12	125	0.00227	0.28	IFTHSTPH	K	I	0.95	2.82	0.366	3.57	0	8	0	0	1	939.468	336	343
male	Long palate, lung and nasal epithelium carcinoma-associated protein 1	IPI00780659	ipi.RAT.v3.75.fasta	52203.2	1	11	12	125	0.00227	0.28	IFTHSTPHIVLNEGGATAAQSVVL	K	E	0.95	4.07	0.416	5.41	0	1	1	0	1	2462.3	336	359
male	Long palate, lung and nasal epithelium carcinoma-associated protein 1	IPI00780659	ipi.RAT.v3.75.fasta	52203.2	1	11	12	125	0.00227	0.28	IPLDMVAGLNTPLIK	R	T	0.95	5.11	0.351	4.8	0	3	0	0	2	1594.92	108	122
male	Long palate, lung and nasal epithelium carcinoma-associated protein 1	IPI00780659	ipi.RAT.v3.75.fasta	52203.2	1	11	12	125	0.00227	0.28	LFDPEVLKDTLTK	K	I	0.95	3.85	0.334	5.22	0	4	0	0	2	1518.84	412	424
male	Long palate, lung and nasal epithelium carcinoma-associated protein 1	IPI00780659	ipi.RAT.v3.75.fasta	52203.2	1	11	12	125	0.00227	0.28	LTTAPIALSPGALEFDLLSPAIQDSNILF	R	N	0.95	4.31	0.48	5	0	0	2	0	1	3027.63	214	242
male	Long palate, lung and nasal epithelium carcinoma-associated protein 1	IPI00780659	ipi.RAT.v3.75.fasta	52203.2	1	11	12	125	0.00227	0.28	NHDATAILQELPLLR	E	G	0.95	1.97	0.427	3.62	0	8	0	0	1	1703.94	43	57
male	Long palate, lung and nasal epithelium carcinoma-associated protein 1	IPI00780659	ipi.RAT.v3.75.fasta	52203.2	1	11	12	125	0.00227	0.28	SGSIPILDSFVNTVLR	K	Y	0.95	4.83	0.464	6.43	0	30	0	0	2	1717.95	63	78
male	Long palate, lung and nasal epithelium carcinoma-associated protein 1	IPI00780659	ipi.RAT.v3.75.fasta	52203.2	1	11	12	125	0.00227	0.28	TLIPQEELVILLR	T	F	0.95	2.54	0.206	6.28	0	9	0	0	1	1536.94	291	303
female	Neonatal submandibular gland proacinar cell protein	IPI00210084	ipi.RAT.v3.75.fasta	23011.1	1	6	7	17	0.000398	0.345	ELKIKDLRILNLNHEVSPNGDEVTLK	I	M	0.95	0	0	4.7	0	0	2	0	1	2987.65	65	90
female	Neonatal submandibular gland proacinar cell protein	IPI00210084	ipi.RAT.v3.75.fasta	23011.1	1	6	7	17	0.000398	0.345	IISNTFHPDEISNPQTAIST	L	-	0.95	3.3	0.202	0	0	1	0	0	1	2185.08	187	206
female	Neonatal submandibular gland proacinar cell protein	IPI00210084	ipi.RAT.v3.75.fasta	23011.1	1	6	7	17	0.000398	0.345	ILNLNHEVSPNGDEVTLK	R	M	0.95	6.48	0.402	6.89	0	7	2	0	2	1992.04	73	90
female	Neonatal submandibular gland proacinar cell protein	IPI00210084	ipi.RAT.v3.75.fasta	23011.1	1	6	7	17	0.000398	0.345	LNLNHEVSPNGDEVTLK	I	M	0.95	3.93	0.203	3.27	0	1	0	0	1	1878.96	74	90
female	Neonatal submandibular gland proacinar cell protein	IPI00210084	ipi.RAT.v3.75.fasta	23011.1	1	6	7	17	0.000398	0.345	QNPELDVESVWSEINYR	F	I	0.95	5.13	0.375	6.96	0	2	0	0	1	2077.98	26	42
female	Neonatal submandibular gland proacinar cell protein	IPI00210084	ipi.RAT.v3.75.fasta	23011.1	1	6	7	17	0.000398	0.345	RGLTLPVR	K	R	0.95	2.55	0.232	2.28	0	2	0	0	2	911.579	170	177
male	Neonatal submandibular gland proacinar cell protein	IPI00210084	ipi.RAT.v3.75.fasta	23011.1	0.998	2	3	3	5.44e-05	0.184	IISNTFHPDEISNPQTAIST	L	-	0.95	4.02	0.344	3.34	0	1	0	0	1	2185.08	187	206
male	Neonatal submandibular gland proacinar cell protein	IPI00210084	ipi.RAT.v3.75.fasta	23011.1	0.998	2	3	3	5.44e-05	0.184	ILNLNHEVSPNGDEVTLK	R	M	0.95	6.26	0.435	6.47	0	1	1	0	2	1992.04	73	90
female	Nucleobindin-2	IPI00200070	ipi.RAT.v3.75.fasta	50073.2	0.999	2	2	4	9.37e-05	0.0571	QVIEVLETDPHFR	K	E	0.95	0	0	7.24	0	2	0	0	2	1565.8	60	72
female	Nucleobindin-2	IPI00200070	ipi.RAT.v3.75.fasta	50073.2	0.999	2	2	4	9.37e-05	0.0571	VHNVEPVESAR	K	I	0.95	3.18	0.379	5.57	0	2	0	0	2	1236.63	34	44
female	Pancreatic alpha-amylase	IPI00211904	ipi.RAT.v3.75.fasta	57159.6	1	3	3	8	0.000187	0.262	ALVFVDNHDNQR	R	G	0.95	4.09	0.344	4.51	3	11	0	0	2	1427.7	304	315	IPI00198466,IPI00565415
female	Pancreatic alpha-amylase	IPI00211904	ipi.RAT.v3.75.fasta	57159.6	1	3	3	8	0.000187	0.262	CDVISGDKVNGNCTGLK	Y	V	0.95	3.59	0.218	0	0	1	0	0	1	1836.86	462	478
female	Pancreatic alpha-amylase	IPI00211904	ipi.RAT.v3.75.fasta	57159.6	1	3	3	8	0.000187	0.262	CNNVGVR	R	I	0.95	2.51	0.138	1.07	8	0	0	0	2	818.394	101	107	IPI00198466
female	Pancreatic alpha-amylase	IPI00211904	ipi.RAT.v3.75.fasta	57159.6	1	3	3	8	0.000187	0.262	FVDNHDNQR	V	G	0.95	3.02	0.285	2.46	0	2	0	0	1	1144.51	307	315	IPI00198466,IPI00565415
female	Pancreatic alpha-amylase	IPI00211904	ipi.RAT.v3.75.fasta	57159.6	1	3	3	8	0.000187	0.262	FVPTDRALVFVDNHDNQR	G	G	0.95	0	0	3.43	0	0	5	0	1	2143.07	298	315
female	Pancreatic alpha-amylase	IPI00211904	ipi.RAT.v3.75.fasta	57159.6	1	3	3	8	0.000187	0.262	HMWPGDIK	K	A	0.95	3.21	0.239	1.72	0	10	0	0	2	983.477	213	220	IPI00198466,IPI00565415
female	Pancreatic alpha-amylase	IPI00211904	ipi.RAT.v3.75.fasta	57159.6	1	3	3	8	0.000187	0.262	IDIGVAGFR	L	L	0.95	3.65	0.274	2.82	0	10	0	0	1	947.531	199	207	IPI00198466,IPI00565415
female	Pancreatic alpha-amylase	IPI00211904	ipi.RAT.v3.75.fasta	57159.6	1	3	3	8	0.000187	0.262	IYVDAVINH	R	M	0.95	3.85	0.478	4.51	0	4	0	0	1	1043.55	108	116	IPI00198466
female	Pancreatic alpha-amylase	IPI00211904	ipi.RAT.v3.75.fasta	57159.6	1	3	3	8	0.000187	0.262	IYVDAVINHMCG	R	S	0.95	4.33	0	3.22	0	1	0	0	1	1334.62	108	119	IPI00198466
female	Pancreatic alpha-amylase	IPI00211904	ipi.RAT.v3.75.fasta	57159.6	1	3	3	8	0.000187	0.262	LHNLNTK	K	W	0.95	2.68	0.0905	1.3	12	0	0	0	2	839.473	226	232	IPI00198466,IPI00565415
female	Pancreatic alpha-amylase	IPI00211904	ipi.RAT.v3.75.fasta	57159.6	1	3	3	8	0.000187	0.262	LIDIGVAGFR	N	L	0.95	4.11	0.284	2.37	3	22	0	0	1	1060.62	198	207	IPI00198466
female	Pancreatic alpha-amylase	IPI00211904	ipi.RAT.v3.75.fasta	57159.6	1	3	3	8	0.000187	0.262	LVFVDNHDNQR	A	G	0.95	3.69	0.177	2.32	0	1	0	0	1	1356.67	305	315	IPI00198466,IPI00565415
female	Pancreatic alpha-amylase	IPI00211904	ipi.RAT.v3.75.fasta	57159.6	1	3	3	8	0.000187	0.262	MAVGFMLAHPYGFTR	K	V	0.95	3.77	0.441	2.92	0	1	0	0	2	1713.82	335	349	IPI00198466
female	Pancreatic alpha-amylase	IPI00211904	ipi.RAT.v3.75.fasta	57159.6	1	3	3	8	0.000187	0.262	NMVAFR	R	N	0.95	2.32	0.113	0.745	6	0	0	0	2	737.376	405	410	IPI00198466,IPI00565415
female	Pancreatic alpha-amylase	IPI00211904	ipi.RAT.v3.75.fasta	57159.6	1	3	3	8	0.000187	0.262	NNLIDIGVAGFR	M	L	0.95	4.46	0.293	8.41	0	2	0	0	1	1288.7	196	207
female	Pancreatic alpha-amylase	IPI00211904	ipi.RAT.v3.75.fasta	57159.6	1	3	3	8	0.000187	0.262	NVVNGQPF	R	A	0.95	1.84	0.226	1.51	1	0	0	0	1	874.442	411	418	IPI00198466,IPI00565415
female	Pancreatic alpha-amylase	IPI00211904	ipi.RAT.v3.75.fasta	57159.6	1	3	3	8	0.000187	0.262	NWGEGWGF	K	V	0.95	2.48	0.273	1.89	2	0	0	0	1	952.395	291	298	IPI00198466,IPI00565415
female	Pancreatic alpha-amylase	IPI00211904	ipi.RAT.v3.75.fasta	57159.6	1	3	3	8	0.000187	0.262	VDNHDNQR	F	G	0.95	2.89	0.201	2.37	2	2	0	0	1	997.445	308	315	IPI00198466,IPI00565415
female	Pancreatic alpha-amylase	IPI00211904	ipi.RAT.v3.75.fasta	57159.6	1	3	3	8	0.000187	0.262	VFVDNHDNQR	L	G	0.95	3.45	0.287	4.37	0	6	0	0	1	1243.58	306	315	IPI00198466,IPI00565415
female	Pancreatic alpha-amylase	IPI00211904	ipi.RAT.v3.75.fasta	57159.6	1	3	3	8	0.000187	0.262	VTEFKYGAK	R	L	0.95	2.74	0.201	3.07	0	1	0	0	2	1042.56	265	273	IPI00198466
female	Pancreatic alpha-amylase	IPI00211904	ipi.RAT.v3.75.fasta	57159.6	1	3	3	8	0.000187	0.262	YQPISYK	R	I	0.95	2.27	0.06	3.66	19	8	0	0	2	898.467	77	83	IPI00198466
male	Pancreatic alpha-amylase	IPI00211904	ipi.RAT.v3.75.fasta	57159.6	1	2	2	3	5.44e-05	0.181	ALVFVDNHDNQR	R	G	0.95	3.98	0.422	5.04	3	8	0	0	2	1427.7	304	315	IPI00198466,IPI00565415
male	Pancreatic alpha-amylase	IPI00211904	ipi.RAT.v3.75.fasta	57159.6	1	2	2	3	5.44e-05	0.181	CNNVGVR	R	I	0.95	2.25	0.147	2.1	21	0	0	0	2	818.394	101	107	IPI00198466
male	Pancreatic alpha-amylase	IPI00211904	ipi.RAT.v3.75.fasta	57159.6	1	2	2	3	5.44e-05	0.181	DKLHNLNTK	L	W	0.95	2.63	0.225	1.47	0	2	0	0	1	1082.6	224	232	IPI00198466,IPI00565415
male	Pancreatic alpha-amylase	IPI00211904	ipi.RAT.v3.75.fasta	57159.6	1	2	2	3	5.44e-05	0.181	FVPTDRALVFVDNHDNQR	G	G	0.95	0	0	3.49	0	0	2	0	1	2143.07	298	315
male	Pancreatic alpha-amylase	IPI00211904	ipi.RAT.v3.75.fasta	57159.6	1	2	2	3	5.44e-05	0.181	HMWPGDIK	K	A	0.95	2.97	0.237	1.41	0	7	0	0	2	983.477	213	220	IPI00198466,IPI00565415
male	Pancreatic alpha-amylase	IPI00211904	ipi.RAT.v3.75.fasta	57159.6	1	2	2	3	5.44e-05	0.181	IDIGVAGFR	L	L	0.95	3.57	0.277	3.52	0	15	0	0	1	947.531	199	207	IPI00198466,IPI00565415
male	Pancreatic alpha-amylase	IPI00211904	ipi.RAT.v3.75.fasta	57159.6	1	2	2	3	5.44e-05	0.181	IYVDAVINH	R	M	0.95	3.67	0.452	5.02	0	3	0	0	1	1043.55	108	116	IPI00198466
male	Pancreatic alpha-amylase	IPI00211904	ipi.RAT.v3.75.fasta	57159.6	1	2	2	3	5.44e-05	0.181	IYVDAVINHM	R	C	0.95	3.98	0.373	5.28	0	3	0	0	1	1174.59	108	117	IPI00198466
male	Pancreatic alpha-amylase	IPI00211904	ipi.RAT.v3.75.fasta	57159.6	1	2	2	3	5.44e-05	0.181	IYVDAVINHMCG	R	S	0.95	4.14	0	5.48	0	3	0	0	1	1334.62	108	119	IPI00198466
male	Pancreatic alpha-amylase	IPI00211904	ipi.RAT.v3.75.fasta	57159.6	1	2	2	3	5.44e-05	0.181	LHNLNTK	K	W	0.95	2.43	0.0813	1.89	19	0	0	0	2	839.473	226	232	IPI00198466,IPI00565415
male	Pancreatic alpha-amylase	IPI00211904	ipi.RAT.v3.75.fasta	57159.6	1	2	2	3	5.44e-05	0.181	LIDIGVAGFR	N	L	0.95	4.22	0.279	2.96	10	20	0	0	1	1060.62	198	207	IPI00198466
male	Pancreatic alpha-amylase	IPI00211904	ipi.RAT.v3.75.fasta	57159.6	1	2	2	3	5.44e-05	0.181	LVFVDNHDNQR	A	G	0.95	3.57	0.261	3.4	0	1	0	0	1	1356.67	305	315	IPI00198466,IPI00565415
male	Pancreatic alpha-amylase	IPI00211904	ipi.RAT.v3.75.fasta	57159.6	1	2	2	3	5.44e-05	0.181	NMVAFR	R	N	0.95	2.25	0.121	1.2	16	0	0	0	2	737.376	405	410	IPI00198466,IPI00565415
male	Pancreatic alpha-amylase	IPI00211904	ipi.RAT.v3.75.fasta	57159.6	1	2	2	3	5.44e-05	0.181	NVVNGQPF	R	A	0.95	1.92	0.27	1.89	3	0	0	0	1	874.442	411	418	IPI00198466,IPI00565415
male	Pancreatic alpha-amylase	IPI00211904	ipi.RAT.v3.75.fasta	57159.6	1	2	2	3	5.44e-05	0.181	NWGEGWGF	K	V	0.95	2.41	0.216	2.33	2	0	0	0	1	952.395	291	298	IPI00198466,IPI00565415
male	Pancreatic alpha-amylase	IPI00211904	ipi.RAT.v3.75.fasta	57159.6	1	2	2	3	5.44e-05	0.181	NWGEGWGFVPTDRALVFVDNHDNQR	K	G	0.95	3.57	0.162	0	0	0	1	0	2	2929.38	291	315
male	Pancreatic alpha-amylase	IPI00211904	ipi.RAT.v3.75.fasta	57159.6	1	2	2	3	5.44e-05	0.181	VDNHDNQR	F	G	0.95	2.71	0.211	3.23	2	3	0	0	1	997.445	308	315	IPI00198466,IPI00565415
male	Pancreatic alpha-amylase	IPI00211904	ipi.RAT.v3.75.fasta	57159.6	1	2	2	3	5.44e-05	0.181	VFVDNHDNQR	L	G	0.95	3.23	0.287	5.55	0	5	0	0	1	1243.58	306	315	IPI00198466,IPI00565415
male	Pancreatic alpha-amylase	IPI00211904	ipi.RAT.v3.75.fasta	57159.6	1	2	2	3	5.44e-05	0.181	YQPISYK	R	I	0.95	1.68	0.225	3.47	21	13	0	0	2	898.467	77	83	IPI00198466
female	Parotid secretory protein	IPI00209118	ipi.RAT.v3.75.fasta	24512.5	1	32	39	479	0.0112	0.583	AQTGLPGVTLGK	N	C	0.95	2.71	0.273	6.06	0	7	0	0	1	1141.66	149	160
female	Parotid secretory protein	IPI00209118	ipi.RAT.v3.75.fasta	24512.5	1	32	39	479	0.0112	0.583	CSGNTDKISISLLGR	K	R	0.95	2.74	0.143	2.06	0	1	0	0	2	1620.84	161	175
female	Parotid secretory protein	IPI00209118	ipi.RAT.v3.75.fasta	24512.5	1	32	39	479	0.0112	0.583	DLLNSVSVQTNAQTGLPGVTLGK	L	C	0.95	5.37	0.561	13.5	0	30	3	0	1	2312.25	138	160
female	Parotid secretory protein	IPI00209118	ipi.RAT.v3.75.fasta	24512.5	1	32	39	479	0.0112	0.583	DLQAGLSSNGKDIDLK	L	L	0.95	4.14	0.0813	1.89	0	1	0	0	1	1673.87	98	113
female	Parotid secretory protein	IPI00209118	ipi.RAT.v3.75.fasta	24512.5	1	32	39	479	0.0112	0.583	DSILETLNK	K	V	0.95	3.48	0.254	2.44	20	23	0	0	2	1032.56	64	72
female	Parotid secretory protein	IPI00209118	ipi.RAT.v3.75.fasta	24512.5	1	32	39	479	0.0112	0.583	DSILETLNKVELGNSNGFTPLNGLLLR	K	V	0.95	4.56	0.272	0	0	0	5	0	2	2927.58	64	90
female	Parotid secretory protein	IPI00209118	ipi.RAT.v3.75.fasta	24512.5	1	32	39	479	0.0112	0.583	ISISLLGR	K	R	0.95	2.95	0.164	1.89	6	23	0	0	2	858.541	168	175
female	Parotid secretory protein	IPI00209118	ipi.RAT.v3.75.fasta	24512.5	1	32	39	479	0.0112	0.583	LDLLNSVSVQTNAQTGLPGVTLGK	S	C	0.95	3.95	0.463	5.8	0	2	0	0	1	2425.33	137	160
female	Parotid secretory protein	IPI00209118	ipi.RAT.v3.75.fasta	24512.5	1	32	39	479	0.0112	0.583	LDLQAGLSSNGK	V	D	0.95	4.77	0.396	5.41	0	1	0	0	1	1202.64	97	108
female	Parotid secretory protein	IPI00209118	ipi.RAT.v3.75.fasta	24512.5	1	32	39	479	0.0112	0.583	LDVGSLQQATTWPSAK	N	D	0.95	5.18	0.453	10.5	0	2	0	0	1	1701.88	48	63
female	Parotid secretory protein	IPI00209118	ipi.RAT.v3.75.fasta	24512.5	1	32	39	479	0.0112	0.583	LNLDVGSLQQATTWPSAK	N	D	0.95	6.53	0.537	10.9	0	3	0	0	1	1929.01	46	63
female	Parotid secretory protein	IPI00209118	ipi.RAT.v3.75.fasta	24512.5	1	32	39	479	0.0112	0.583	LQQATTWPSAK	S	D	0.95	3.56	0.341	4.89	0	4	0	0	1	1230.65	53	63
female	Parotid secretory protein	IPI00209118	ipi.RAT.v3.75.fasta	24512.5	1	32	39	479	0.0112	0.583	NAQTGLPGVTLGK	T	C	0.95	4.06	0.425	5.17	0	1	0	0	1	1255.7	148	160
female	Parotid secretory protein	IPI00209118	ipi.RAT.v3.75.fasta	24512.5	1	32	39	479	0.0112	0.583	NLDVGSLQQATTWPSAK	L	D	0.95	6.27	0.603	11.7	0	119	2	0	1	1815.92	47	63
female	Parotid secretory protein	IPI00209118	ipi.RAT.v3.75.fasta	24512.5	1	32	39	479	0.0112	0.583	NLNLDVGSLQQATTWPSAK	Q	D	0.95	6.92	0.619	14.7	0	19	1	0	1	2043.05	45	63
female	Parotid secretory protein	IPI00209118	ipi.RAT.v3.75.fasta	24512.5	1	32	39	479	0.0112	0.583	NSVSVQTNAQTGLPGVTLGK	L	C	0.95	5.47	0.562	8	0	4	0	0	1	1971.05	141	160
female	Parotid secretory protein	IPI00209118	ipi.RAT.v3.75.fasta	24512.5	1	32	39	479	0.0112	0.583	PSEAVAQNLNLDVGSLQQATTWPSAK	S	D	0.95	3.32	0.334	3.42	0	0	35	0	1	2725.38	38	63
female	Parotid secretory protein	IPI00209118	ipi.RAT.v3.75.fasta	24512.5	1	32	39	479	0.0112	0.583	QTGLPGVTLGK	A	C	0.95	1.63	0.275	3.74	0	2	0	0	1	1070.62	150	160
female	Parotid secretory protein	IPI00209118	ipi.RAT.v3.75.fasta	24512.5	1	32	39	479	0.0112	0.583	RLPFVNR	R	I	0.95	2.66	0.0804	1.66	0	1	0	0	2	901.537	176	182
female	Parotid secretory protein	IPI00209118	ipi.RAT.v3.75.fasta	24512.5	1	32	39	479	0.0112	0.583	SNGFTPLNGLLLR	N	V	0.95	2.95	0.0971	2.16	0	1	0	0	1	1401.79	78	90
female	Parotid secretory protein	IPI00209118	ipi.RAT.v3.75.fasta	24512.5	1	32	39	479	0.0112	0.583	SNVLTGQLAVPL	L	-	0.95	3.78	0.359	4.62	0	4	0	0	1	1211.7	224	235
female	Parotid secretory protein	IPI00209118	ipi.RAT.v3.75.fasta	24512.5	1	32	39	479	0.0112	0.583	SPSEAVAQNLNLDVGSLQQATTWPSAK	N	D	0.95	3.65	0.321	0	0	0	2	0	1	2812.41	37	63
female	Parotid secretory protein	IPI00209118	ipi.RAT.v3.75.fasta	24512.5	1	32	39	479	0.0112	0.583	SVQTNAQTGLPGVTLGK	V	C	0.95	4.99	0.459	7.7	0	5	0	0	1	1670.91	144	160
female	Parotid secretory protein	IPI00209118	ipi.RAT.v3.75.fasta	24512.5	1	32	39	479	0.0112	0.583	SVSVQTNAQTGLPGVTLGK	N	C	0.95	5.01	0.468	7.59	0	17	0	0	1	1857.01	142	160
female	Parotid secretory protein	IPI00209118	ipi.RAT.v3.75.fasta	24512.5	1	32	39	479	0.0112	0.583	TNAQTGLPGVTLGK	Q	C	0.95	4.62	0.524	5.72	1	16	0	0	1	1356.75	147	160
female	Parotid secretory protein	IPI00209118	ipi.RAT.v3.75.fasta	24512.5	1	32	39	479	0.0112	0.583	TPLNGLLLR	F	V	0.95	2.76	0.276	2.68	0	5	0	0	1	996.62	82	90
female	Parotid secretory protein	IPI00209118	ipi.RAT.v3.75.fasta	24512.5	1	32	39	479	0.0112	0.583	VELGNSNGFTPLNGLLLR	K	V	0.95	5.61	0.432	7.96	0	13	0	0	2	1914.04	73	90
female	Parotid secretory protein	IPI00209118	ipi.RAT.v3.75.fasta	24512.5	1	32	39	479	0.0112	0.583	VLDLQAGLSSNGK	R	D	0.95	5.53	0.429	6.44	3	59	0	0	2	1301.71	96	108
female	Parotid secretory protein	IPI00209118	ipi.RAT.v3.75.fasta	24512.5	1	32	39	479	0.0112	0.583	VLDLQAGLSSNGKDIDLK	R	L	0.95	4.07	0.362	1.89	0	33	0	0	2	1886.02	96	113
female	Parotid secretory protein	IPI00209118	ipi.RAT.v3.75.fasta	24512.5	1	32	39	479	0.0112	0.583	VNKFRVLDLQAGLSSNGK	R	D	0.95	3.96	0.426	4.66	0	1	0	0	2	1946.08	91	108
female	Parotid secretory protein	IPI00209118	ipi.RAT.v3.75.fasta	24512.5	1	32	39	479	0.0112	0.583	VQTNAQTGLPGVTLGK	S	C	0.95	5.29	0.445	10.9	0	1	0	0	1	1583.88	145	160
female	Parotid secretory protein	IPI00209118	ipi.RAT.v3.75.fasta	24512.5	1	32	39	479	0.0112	0.583	VSLDLLNSVSVQTNAQTGLPGVTLGK	A	C	0.95	2.21	0.302	4.04	0	3	0	0	1	2611.43	135	160
male	Parotid secretory protein	IPI00209118	ipi.RAT.v3.75.fasta	24512.5	1	44	56	1313	0.0238	0.604	AQNLNLDVGSLQQATTWPSAK	V	D	0.95	5.29	0.481	15.3	0	1	0	0	1	2242.15	43	63
male	Parotid secretory protein	IPI00209118	ipi.RAT.v3.75.fasta	24512.5	1	44	56	1313	0.0238	0.604	AQTGLPGVTLGK	N	C	0.95	2.6	0.305	5.24	6	12	0	0	1	1141.66	149	160
male	Parotid secretory protein	IPI00209118	ipi.RAT.v3.75.fasta	24512.5	1	44	56	1313	0.0238	0.604	DILNSPSEAVAQNLNLDVGSLQQATTWPSAK	L	D	0.95	4.85	0.542	5.24	0	0	4	0	1	3267.65	33	63
male	Parotid secretory protein	IPI00209118	ipi.RAT.v3.75.fasta	24512.5	1	44	56	1313	0.0238	0.604	DLLNSVSVQTNAQTGLPGVTLGK	L	C	0.95	6.23	0.446	4.77	0	107	9	0	1	2312.25	138	160
male	Parotid secretory protein	IPI00209118	ipi.RAT.v3.75.fasta	24512.5	1	44	56	1313	0.0238	0.604	DLQAGLSSNGK	L	D	0.95	2.66	0.28	2.26	0	3	0	0	1	1089.55	98	108
male	Parotid secretory protein	IPI00209118	ipi.RAT.v3.75.fasta	24512.5	1	44	56	1313	0.0238	0.604	DSILETLNK	K	V	0.95	3.62	0.252	2.39	72	167	0	0	2	1032.56	64	72
male	Parotid secretory protein	IPI00209118	ipi.RAT.v3.75.fasta	24512.5	1	44	56	1313	0.0238	0.604	DVGSLQQATTWPSAK	L	D	0.95	5.19	0.461	5.26	0	4	0	0	1	1588.8	49	63
male	Parotid secretory protein	IPI00209118	ipi.RAT.v3.75.fasta	24512.5	1	44	56	1313	0.0238	0.604	GFTPLNGLLLR	N	V	0.95	2.74	0.0762	4.64	0	3	0	0	1	1200.71	80	90
male	Parotid secretory protein	IPI00209118	ipi.RAT.v3.75.fasta	24512.5	1	44	56	1313	0.0238	0.604	GLLSNVLTGQLAVPL	Q	-	0.95	2.91	0.24	3.52	0	1	0	0	1	1494.89	221	235
male	Parotid secretory protein	IPI00209118	ipi.RAT.v3.75.fasta	24512.5	1	44	56	1313	0.0238	0.604	ILDGVSGLLTGAVSIL	R	L	0.95	3.2	0.195	1.85	0	1	0	0	1	1527.9	183	198
male	Parotid secretory protein	IPI00209118	ipi.RAT.v3.75.fasta	24512.5	1	44	56	1313	0.0238	0.604	ILDGVSGLLTGAVSILL	R	Q	0.95	4.36	0.422	8.15	0	8	0	0	1	1640.98	183	199
male	Parotid secretory protein	IPI00209118	ipi.RAT.v3.75.fasta	24512.5	1	44	56	1313	0.0238	0.604	ILNSPSEAVAQNLNLDVGSLQQATTWPSAK	D	D	0.95	0	0	6.7	0	0	1	0	1	3152.62	34	63
male	Parotid secretory protein	IPI00209118	ipi.RAT.v3.75.fasta	24512.5	1	44	56	1313	0.0238	0.604	ISISLLGR	K	R	0.95	2.96	0.157	1.46	1	28	0	0	2	858.541	168	175
male	Parotid secretory protein	IPI00209118	ipi.RAT.v3.75.fasta	24512.5	1	44	56	1313	0.0238	0.604	LDLLNSVSVQTNAQTGLPGVTLGK	S	C	0.95	5.01	0.495	9.09	0	6	0	0	1	2425.33	137	160
male	Parotid secretory protein	IPI00209118	ipi.RAT.v3.75.fasta	24512.5	1	44	56	1313	0.0238	0.604	LDLQAGLSSNGK	V	D	0.95	4.76	0.398	6.04	0	2	0	0	1	1202.64	97	108
male	Parotid secretory protein	IPI00209118	ipi.RAT.v3.75.fasta	24512.5	1	44	56	1313	0.0238	0.604	LDVGSLQQATTWPSAK	N	D	0.95	5.07	0.483	7.82	0	4	0	0	1	1701.88	48	63
male	Parotid secretory protein	IPI00209118	ipi.RAT.v3.75.fasta	24512.5	1	44	56	1313	0.0238	0.604	LNLDVGSLQQATTWPSAK	N	D	0.95	6.21	0.565	12	0	6	0	0	1	1929.01	46	63
male	Parotid secretory protein	IPI00209118	ipi.RAT.v3.75.fasta	24512.5	1	44	56	1313	0.0238	0.604	LNSVSVQTNAQTGLPGVTLGK	L	C	0.95	5.3	0.45	9.6	0	1	0	0	1	2084.13	140	160
male	Parotid secretory protein	IPI00209118	ipi.RAT.v3.75.fasta	24512.5	1	44	56	1313	0.0238	0.604	LQQATTWPSAK	S	D	0.95	3.65	0.391	3.7	3	4	0	0	1	1230.65	53	63
male	Parotid secretory protein	IPI00209118	ipi.RAT.v3.75.fasta	24512.5	1	44	56	1313	0.0238	0.604	NAQTGLPGVTLGK	T	C	0.95	4.31	0.426	6.28	0	4	0	0	1	1255.7	148	160
male	Parotid secretory protein	IPI00209118	ipi.RAT.v3.75.fasta	24512.5	1	44	56	1313	0.0238	0.604	NLDVGSLQQATTWPSAK	L	D	0.95	6.46	0.577	10.5	0	207	12	0	1	1815.92	47	63
male	Parotid secretory protein	IPI00209118	ipi.RAT.v3.75.fasta	24512.5	1	44	56	1313	0.0238	0.604	NLNLDVGSLQQATTWPSAK	Q	D	0.95	7.08	0.614	16.4	0	32	6	0	1	2043.05	45	63
male	Parotid secretory protein	IPI00209118	ipi.RAT.v3.75.fasta	24512.5	1	44	56	1313	0.0238	0.604	NSVSVQTNAQTGLPGVTLGK	L	C	0.95	6	0.546	7.59	0	44	0	0	1	1971.05	141	160
male	Parotid secretory protein	IPI00209118	ipi.RAT.v3.75.fasta	24512.5	1	44	56	1313	0.0238	0.604	PSEAVAQNLNLDVGSLQQATTWPSAK	S	D	0.95	3.51	0.381	3.2	0	0	73	0	1	2725.38	38	63
male	Parotid secretory protein	IPI00209118	ipi.RAT.v3.75.fasta	24512.5	1	44	56	1313	0.0238	0.604	QATTWPSAK	Q	D	0.95	1.64	0.202	3.17	3	8	0	0	1	989.505	55	63
male	Parotid secretory protein	IPI00209118	ipi.RAT.v3.75.fasta	24512.5	1	44	56	1313	0.0238	0.604	QNLNLDVGSLQQATTWPSAK	A	D	0.95	5.82	0.486	12.5	0	4	3	0	1	2171.11	44	63
male	Parotid secretory protein	IPI00209118	ipi.RAT.v3.75.fasta	24512.5	1	44	56	1313	0.0238	0.604	QQATTWPSAK	L	D	0.95	1.77	0.235	3.28	0	2	0	0	1	1117.56	54	63
male	Parotid secretory protein	IPI00209118	ipi.RAT.v3.75.fasta	24512.5	1	44	56	1313	0.0238	0.604	QTGLPGVTLGK	A	C	0.95	1.6	0.255	4.89	0	3	0	0	1	1070.62	150	160
male	Parotid secretory protein	IPI00209118	ipi.RAT.v3.75.fasta	24512.5	1	44	56	1313	0.0238	0.604	SISLLGR	I	R	0.95	1.83	0.109	1.05	1	0	0	0	1	745.457	169	175
male	Parotid secretory protein	IPI00209118	ipi.RAT.v3.75.fasta	24512.5	1	44	56	1313	0.0238	0.604	SLQQATTWPSAK	G	D	0.95	4.46	0.442	6.96	0	2	0	0	1	1317.68	52	63
male	Parotid secretory protein	IPI00209118	ipi.RAT.v3.75.fasta	24512.5	1	44	56	1313	0.0238	0.604	SNGFTPLNGLLLR	N	V	0.95	4.06	0.323	5.82	0	1	0	0	1	1401.79	78	90
male	Parotid secretory protein	IPI00209118	ipi.RAT.v3.75.fasta	24512.5	1	44	56	1313	0.0238	0.604	SNVLTGQLAVPL	L	-	0.95	3.67	0.433	4.64	0	3	0	0	1	1211.7	224	235
male	Parotid secretory protein	IPI00209118	ipi.RAT.v3.75.fasta	24512.5	1	44	56	1313	0.0238	0.604	SVQTNAQTGLPGVTLGK	V	C	0.95	4.57	0.484	8.03	0	9	0	0	1	1670.91	144	160
male	Parotid secretory protein	IPI00209118	ipi.RAT.v3.75.fasta	24512.5	1	44	56	1313	0.0238	0.604	SVSVQTNAQTGLPGVTLGK	N	C	0.95	5.07	0.5	9.02	0	19	2	0	1	1857.01	142	160
male	Parotid secretory protein	IPI00209118	ipi.RAT.v3.75.fasta	24512.5	1	44	56	1313	0.0238	0.604	TGLPGVTLGK	Q	C	0.95	2.59	0.198	3.7	0	1	0	0	1	942.562	151	160
male	Parotid secretory protein	IPI00209118	ipi.RAT.v3.75.fasta	24512.5	1	44	56	1313	0.0238	0.604	TNAQTGLPGVTLGK	Q	C	0.95	4.87	0.495	6.6	11	100	0	0	1	1356.75	147	160
male	Parotid secretory protein	IPI00209118	ipi.RAT.v3.75.fasta	24512.5	1	44	56	1313	0.0238	0.604	TPLNGLLLR	F	V	0.95	3.33	0.24	1.74	0	4	0	0	1	996.62	82	90
male	Parotid secretory protein	IPI00209118	ipi.RAT.v3.75.fasta	24512.5	1	44	56	1313	0.0238	0.604	VELGNSNGFTPLNGLLLR	K	V	0.95	6.02	0.451	9.89	0	56	0	0	2	1914.04	73	90
male	Parotid secretory protein	IPI00209118	ipi.RAT.v3.75.fasta	24512.5	1	44	56	1313	0.0238	0.604	VLDLQAGLSSNGK	R	D	0.95	5.67	0.415	7.96	13	168	0	0	2	1301.71	96	108
male	Parotid secretory protein	IPI00209118	ipi.RAT.v3.75.fasta	24512.5	1	44	56	1313	0.0238	0.604	VLDLQAGLSSNGKD	R	I	0.95	3.2	0.213	3.24	0	2	0	0	1	1416.73	96	109
male	Parotid secretory protein	IPI00209118	ipi.RAT.v3.75.fasta	24512.5	1	44	56	1313	0.0238	0.604	VLDLQAGLSSNGKDIDLK	R	L	0.95	3.95	0.337	1.89	0	27	0	0	2	1886.02	96	113
male	Parotid secretory protein	IPI00209118	ipi.RAT.v3.75.fasta	24512.5	1	44	56	1313	0.0238	0.604	VQTNAQTGLPGVTLGK	S	C	0.95	5.24	0.359	7.46	0	3	0	0	1	1583.88	145	160
male	Parotid secretory protein	IPI00209118	ipi.RAT.v3.75.fasta	24512.5	1	44	56	1313	0.0238	0.604	VSLDLLNSVSVQTNAQTGLPGVTLGK	A	C	0.95	5.38	0.458	9.1	0	26	0	0	1	2611.43	135	160
male	Parotid secretory protein	IPI00209118	ipi.RAT.v3.75.fasta	24512.5	1	44	56	1313	0.0238	0.604	VSVQTNAQTGLPGVTLGK	S	C	0.95	5.16	0.481	8.21	0	10	0	0	1	1769.98	143	160
female	Polymeric immunoglobulin receptor	IPI00205255	ipi.RAT.v3.75.fasta	84779.9	1	5	5	17	0.000398	0.0728	GSPHINPTDANAR	R	A	0.95	2.99	0.186	3.48	0	2	0	0	2	1349.66	570	582
female	Polymeric immunoglobulin receptor	IPI00205255	ipi.RAT.v3.75.fasta	84779.9	1	5	5	17	0.000398	0.0728	HLTQEDTGSYK	A	C	0.95	3.79	0.461	7.02	0	3	0	0	1	1278.6	99	109
female	Polymeric immunoglobulin receptor	IPI00205255	ipi.RAT.v3.75.fasta	84779.9	1	5	5	17	0.000398	0.0728	KRGEACEVVIDSTEY	K	V	0.95	3.16	0.313	0	0	1	0	0	1	1755.82	168	182
female	Polymeric immunoglobulin receptor	IPI00205255	ipi.RAT.v3.75.fasta	84779.9	1	5	5	17	0.000398	0.0728	RDPAFEGR	K	I	0.95	2.75	0.238	3.44	0	6	0	0	2	947.469	288	295
female	Polymeric immunoglobulin receptor	IPI00205255	ipi.RAT.v3.75.fasta	84779.9	1	5	5	17	0.000398	0.0728	TISCHYPCK	F	F	0.95	3.25	0.335	0	0	5	0	0	1	1165.51	481	489
male	Polymeric immunoglobulin receptor	IPI00205255	ipi.RAT.v3.75.fasta	84779.9	0.998	2	2	12	0.000218	0.0221	RDPAFEGR	K	I	0.95	3.04	0.197	2.1	0	9	0	0	2	947.469	288	295
male	Polymeric immunoglobulin receptor	IPI00205255	ipi.RAT.v3.75.fasta	84779.9	0.998	2	2	12	0.000218	0.0221	TISCHYPCK	F	F	0.95	2.81	0.289	0	0	3	0	0	1	1165.51	481	489
female	Prolactin-inducible protein homolog	IPI00198494	ipi.RAT.v3.75.fasta	16420.7	1	6	7	41	0.000961	0.329	AYLISNTPVDGGFNY	K	I	0.95	4.93	0.469	10.7	0	4	0	0	1	1630.77	70	84
female	Prolactin-inducible protein homolog	IPI00198494	ipi.RAT.v3.75.fasta	16420.7	1	6	7	41	0.000961	0.329	AYLISNTPVDGGFNYIQTRCIC	K	N	0.95	3.64	0.368	2.68	0	0	1	0	1	2448.17	70	91
female	Prolactin-inducible protein homolog	IPI00198494	ipi.RAT.v3.75.fasta	16420.7	1	6	7	41	0.000961	0.329	CICNDHPTTLY	R	W	0.95	3.97	0.439	0	5	24	0	0	1	1393.59	89	99
female	Prolactin-inducible protein homolog	IPI00198494	ipi.RAT.v3.75.fasta	16420.7	1	6	7	41	0.000961	0.329	CICNDHPTTLYW	R	T	0.95	3.13	0.355	0	0	2	0	0	1	1579.67	89	100
female	Prolactin-inducible protein homolog	IPI00198494	ipi.RAT.v3.75.fasta	16420.7	1	6	7	41	0.000961	0.329	IMVDIVKDK	R	G	0.95	3.23	0.212	2.43	0	3	0	0	2	1060.61	112	120
female	Prolactin-inducible protein homolog	IPI00198494	ipi.RAT.v3.75.fasta	16420.7	1	6	7	41	0.000961	0.329	YKECLVVK	Q	A	0.95	2.67	0.165	0	0	2	0	0	1	1038.57	62	69
male	Prolactin-inducible protein homolog	IPI00198494	ipi.RAT.v3.75.fasta	16420.7	1	3	3	20	0.000363	0.24	AYLISNTPVDGGFNY	K	I	0.95	4.95	0.484	10.2	0	3	0	0	1	1630.77	70	84
male	Prolactin-inducible protein homolog	IPI00198494	ipi.RAT.v3.75.fasta	16420.7	1	3	3	20	0.000363	0.24	CICNDHPTTLY	R	W	0.95	3.66	0.477	0	0	16	0	0	1	1393.59	89	99
male	Prolactin-inducible protein homolog	IPI00198494	ipi.RAT.v3.75.fasta	16420.7	1	3	3	20	0.000363	0.24	VVTQTLTFR	F	I	0.95	2.59	0.292	2.43	0	1	0	0	1	1064.61	103	111
female	Proline-rich proteoglycan 2	IPI00187926	ipi.RAT.v3.75.fasta	30006.1	1	11	13	48	0.00112	0.251	GGPQRPPQPGSPQGPPPPGGPQQR	Q	P	0.95	4.64	0.407	0	0	0	7	0	0	2371.2	136	159
female	Proline-rich proteoglycan 2	IPI00187926	ipi.RAT.v3.75.fasta	30006.1	1	11	13	48	0.00112	0.251	GPPPQGGPQRPPQPGSPQGPPPPGGPQQR	Q	P	0.95	4.64	0.465	0	0	0	2	0	0	2847.44	131	159
female	Proline-rich proteoglycan 2	IPI00187926	ipi.RAT.v3.75.fasta	30006.1	1	11	13	48	0.00112	0.251	GPQRPPQPGSPQGPPPPGGPQQR	A	P	0.95	4.15	0.414	0	0	0	11	0	0	2314.18	105	127
female	Proline-rich proteoglycan 2	IPI00187926	ipi.RAT.v3.75.fasta	30006.1	1	11	13	48	0.00112	0.251	GSPQGPPPPGGPQQR	P	P	0.95	3.06	0.432	0	0	3	0	0	0	1456.73	113	127
female	Proline-rich proteoglycan 2	IPI00187926	ipi.RAT.v3.75.fasta	30006.1	1	11	13	48	0.00112	0.251	PGSPQGPPPPGGPQQR	Q	P	0.95	3.39	0.378	0	0	3	0	0	0	1553.78	112	127
female	Proline-rich proteoglycan 2	IPI00187926	ipi.RAT.v3.75.fasta	30006.1	1	11	13	48	0.00112	0.251	PQGPPPPGGPQQR	S	P	0.95	3.26	0.224	0	0	1	0	0	0	1312.68	115	127
female	Proline-rich proteoglycan 2	IPI00187926	ipi.RAT.v3.75.fasta	30006.1	1	11	13	48	0.00112	0.251	PQPGSPQGPPPPGGPQQR	P	P	0.95	3.04	0.22	0	0	1	0	0	0	1778.89	110	127
female	Proline-rich proteoglycan 2	IPI00187926	ipi.RAT.v3.75.fasta	30006.1	1	11	13	48	0.00112	0.251	PQRPPQPGSPQGPPPPGGPQQR	G	P	0.95	4.01	0.369	0	0	1	7	0	0	2257.16	106	127
female	Proline-rich proteoglycan 2	IPI00187926	ipi.RAT.v3.75.fasta	30006.1	1	11	13	48	0.00112	0.251	QGGPQRPPQPGSPQGPPPPGGPQQR	P	P	0.95	3.74	0.375	0	0	0	1	0	0	2499.26	135	159
female	Proline-rich proteoglycan 2	IPI00187926	ipi.RAT.v3.75.fasta	30006.1	1	11	13	48	0.00112	0.251	RPPQPGSPQGPPPPGGPQQR	Q	P	0.95	5.86	0.524	0	0	6	2	0	0	2032.05	108	127
female	Proline-rich proteoglycan 2	IPI00187926	ipi.RAT.v3.75.fasta	30006.1	1	11	13	48	0.00112	0.251	SPQGPPPPGGPQQR	G	P	0.95	2.73	0.365	0	0	3	0	0	0	1399.71	114	127
male	Proline-rich proteoglycan 2	IPI00187926	ipi.RAT.v3.75.fasta	30006.1	1	13	16	289	0.00525	0.336	APQGPPPQGGPQRPPQPGSPQ	R	G	0.95	3.92	0.424	0	0	1	0	0	1	2075.04	192	212
male	Proline-rich proteoglycan 2	IPI00187926	ipi.RAT.v3.75.fasta	30006.1	1	13	16	289	0.00525	0.336	APQGPPPQGGPQRPPQPGSPQGPPPPGGPQQ	R	R	0.95	4.84	0.514	0	0	14	1	0	1	2987.49	192	222
male	Proline-rich proteoglycan 2	IPI00187926	ipi.RAT.v3.75.fasta	30006.1	1	13	16	289	0.00525	0.336	GGPQRPPQPGSPQGPPPPGGPQQR	Q	P	0.95	4.04	0.394	0	0	0	2	0	0	2371.2	136	159
male	Proline-rich proteoglycan 2	IPI00187926	ipi.RAT.v3.75.fasta	30006.1	1	13	16	289	0.00525	0.336	GPQRPPQPGSPQGPPPPGGPQQR	A	P	0.95	4.5	0.374	0	0	0	10	0	0	2314.18	105	127
male	Proline-rich proteoglycan 2	IPI00187926	ipi.RAT.v3.75.fasta	30006.1	1	13	16	289	0.00525	0.336	GSPQGPPPPGGPQQR	P	P	0.95	3.02	0.308	0	0	2	0	0	0	1456.73	113	127
male	Proline-rich proteoglycan 2	IPI00187926	ipi.RAT.v3.75.fasta	30006.1	1	13	16	289	0.00525	0.336	PGSPQGPPPPGGPQQR	Q	P	0.95	3.9	0.433	0	0	2	0	0	0	1553.78	112	127
male	Proline-rich proteoglycan 2	IPI00187926	ipi.RAT.v3.75.fasta	30006.1	1	13	16	289	0.00525	0.336	PPQGPPPQGGPQRPPQPGSPQGPPP	R	P	0.95	3.64	0.244	0	0	0	1	0	0	2449.24	128	152
male	Proline-rich proteoglycan 2	IPI00187926	ipi.RAT.v3.75.fasta	30006.1	1	13	16	289	0.00525	0.336	PQGPPPPGGPQQR	S	P	0.95	4.38	0.332	0	0	195	17	0	0	1312.68	115	127
male	Proline-rich proteoglycan 2	IPI00187926	ipi.RAT.v3.75.fasta	30006.1	1	13	16	289	0.00525	0.336	PQRPPQPGSPQGPPPPGGPQQR	G	P	0.95	5.23	0.488	0	0	0	3	0	0	2257.16	106	127
male	Proline-rich proteoglycan 2	IPI00187926	ipi.RAT.v3.75.fasta	30006.1	1	13	16	289	0.00525	0.336	QRPPQPGSPQGPPPPGGPQQR	P	P	0.95	3.71	0.275	0	0	0	3	0	0	2160.11	107	127
male	Proline-rich proteoglycan 2	IPI00187926	ipi.RAT.v3.75.fasta	30006.1	1	13	16	289	0.00525	0.336	RPPQGPPPQGGPQR	Q	P	0.95	3.77	0.144	0	0	1	0	0	0	1468.78	127	140
male	Proline-rich proteoglycan 2	IPI00187926	ipi.RAT.v3.75.fasta	30006.1	1	13	16	289	0.00525	0.336	RPPQPGSPQGPPPPGGPQQR	Q	P	0.95	5.26	0.558	0	0	14	8	0	0	2032.05	108	127
male	Proline-rich proteoglycan 2	IPI00187926	ipi.RAT.v3.75.fasta	30006.1	1	13	16	289	0.00525	0.336	SPQGPPPPGGPQQR	G	P	0.95	3.83	0.355	0	0	15	0	0	0	1399.71	114	127
female	Protein	IPI00565415	ipi.RAT.v3.75.fasta	35810	1	6	7	23	0.000539	0.314	AEYMNRHIDIGVAGFR	V	L	0.95	4.45	0.31	3.17	0	2	0	0	1	1848.92	7	22
female	Protein	IPI00565415	ipi.RAT.v3.75.fasta	35810	1	6	7	23	0.000539	0.314	ALVFVDNHDNQR	R	G	0.95	4.09	0.344	4.51	3	11	0	0	2	1427.7	119	130	IPI00211904,IPI00198466
female	Protein	IPI00565415	ipi.RAT.v3.75.fasta	35810	1	6	7	23	0.000539	0.314	DNGSNQVAFGR	G	G	0.95	3.41	0.4	6.24	0	9	0	0	1	1164.54	237	247	IPI00198466
female	Protein	IPI00565415	ipi.RAT.v3.75.fasta	35810	1	6	7	23	0.000539	0.314	EVTINPDTTCGNGWVCEHR	K	W	0.95	3.52	0.288	0	0	3	0	0	2	2187.95	196	214
female	Protein	IPI00565415	ipi.RAT.v3.75.fasta	35810	1	6	7	23	0.000539	0.314	FRNVVNGQPFSNGDNGSNQVAFGR	A	G	0.95	2.77	0.0927	3.68	0	0	3	0	1	2581.23	224	247
female	Protein	IPI00565415	ipi.RAT.v3.75.fasta	35810	1	6	7	23	0.000539	0.314	FVDNHDNQR	V	G	0.95	3.02	0.285	2.46	0	2	0	0	1	1144.51	122	130	IPI00211904,IPI00198466
female	Protein	IPI00565415	ipi.RAT.v3.75.fasta	35810	1	6	7	23	0.000539	0.314	GSNQVAFGR	N	G	0.95	3.1	0.177	2.11	0	1	0	0	1	935.469	239	247	IPI00198466
female	Protein	IPI00565415	ipi.RAT.v3.75.fasta	35810	1	6	7	23	0.000539	0.314	HMWPGDIK	K	A	0.95	3.21	0.239	1.72	0	10	0	0	2	983.477	28	35	IPI00211904,IPI00198466
female	Protein	IPI00565415	ipi.RAT.v3.75.fasta	35810	1	6	7	23	0.000539	0.314	IDIGVAGFR	H	L	0.95	3.65	0.274	2.82	0	10	0	0	1	947.531	14	22	IPI00211904,IPI00198466
female	Protein	IPI00565415	ipi.RAT.v3.75.fasta	35810	1	6	7	23	0.000539	0.314	LHNLNTK	K	W	0.95	2.68	0.0905	1.3	12	0	0	0	2	839.473	41	47	IPI00211904,IPI00198466
female	Protein	IPI00565415	ipi.RAT.v3.75.fasta	35810	1	6	7	23	0.000539	0.314	LVFVDNHDNQR	A	G	0.95	3.69	0.177	2.32	0	1	0	0	1	1356.67	120	130	IPI00211904,IPI00198466
female	Protein	IPI00565415	ipi.RAT.v3.75.fasta	35810	1	6	7	23	0.000539	0.314	NMVAFR	R	N	0.95	2.32	0.113	0.745	6	0	0	0	2	737.376	220	225	IPI00211904,IPI00198466
female	Protein	IPI00565415	ipi.RAT.v3.75.fasta	35810	1	6	7	23	0.000539	0.314	NVVNGQPF	R	S	0.95	1.84	0.226	1.51	1	0	0	0	1	874.442	226	233	IPI00211904,IPI00198466
female	Protein	IPI00565415	ipi.RAT.v3.75.fasta	35810	1	6	7	23	0.000539	0.314	NWGEGWGF	K	V	0.95	2.48	0.273	1.89	2	0	0	0	1	952.395	106	113	IPI00211904,IPI00198466
female	Protein	IPI00565415	ipi.RAT.v3.75.fasta	35810	1	6	7	23	0.000539	0.314	QPFSNGDNGSNQVAFGR	G	G	0.95	4.44	0.256	3.08	0	5	0	0	1	1794.82	231	247
female	Protein	IPI00565415	ipi.RAT.v3.75.fasta	35810	1	6	7	23	0.000539	0.314	TKVAEYMNRHIDIGVAGFR	R	L	0.95	2.94	0.173	1.39	0	1	0	0	2	2193.12	4	22
female	Protein	IPI00565415	ipi.RAT.v3.75.fasta	35810	1	6	7	23	0.000539	0.314	VAEYMNRHIDIGVAGFR	K	L	0.95	4.33	0.243	4.08	0	7	2	0	2	1947.99	6	22
female	Protein	IPI00565415	ipi.RAT.v3.75.fasta	35810	1	6	7	23	0.000539	0.314	VDNHDNQR	F	G	0.95	2.89	0.201	2.37	2	2	0	0	1	997.445	123	130	IPI00211904,IPI00198466
female	Protein	IPI00565415	ipi.RAT.v3.75.fasta	35810	1	6	7	23	0.000539	0.314	VFVDNHDNQR	L	G	0.95	3.45	0.287	4.37	0	6	0	0	1	1243.58	121	130	IPI00211904,IPI00198466
male	Protein	IPI00565415	ipi.RAT.v3.75.fasta	35810	1	6	7	35	0.000635	0.32	AEYMNRHIDIGVAGFR	V	L	0.95	4.05	0.239	1.66	0	2	0	0	1	1848.92	7	22
male	Protein	IPI00565415	ipi.RAT.v3.75.fasta	35810	1	6	7	35	0.000635	0.32	ALVFVDNHDNQR	R	G	0.95	3.98	0.422	5.04	3	8	0	0	2	1427.7	119	130	IPI00211904,IPI00198466
male	Protein	IPI00565415	ipi.RAT.v3.75.fasta	35810	1	6	7	35	0.000635	0.32	DKLHNLNTK	L	W	0.95	2.63	0.225	1.47	0	2	0	0	1	1082.6	39	47	IPI00211904,IPI00198466
male	Protein	IPI00565415	ipi.RAT.v3.75.fasta	35810	1	6	7	35	0.000635	0.32	DNGSNQVAFGR	G	G	0.95	3.73	0.407	6.89	0	31	0	0	1	1164.54	237	247	IPI00198466
male	Protein	IPI00565415	ipi.RAT.v3.75.fasta	35810	1	6	7	35	0.000635	0.32	EVTINPDTTCGNGWVCEHR	K	W	0.95	3.35	0.237	0	0	1	0	0	2	2187.95	196	214
male	Protein	IPI00565415	ipi.RAT.v3.75.fasta	35810	1	6	7	35	0.000635	0.32	FRNVVNGQPFSNGDNGSNQVAFGR	A	G	0.95	2.56	0	3.68	0	0	2	0	1	2581.23	224	247
male	Protein	IPI00565415	ipi.RAT.v3.75.fasta	35810	1	6	7	35	0.000635	0.32	GSNQVAFGR	N	G	0.95	3.53	0.33	3.62	0	1	0	0	1	935.469	239	247	IPI00198466
male	Protein	IPI00565415	ipi.RAT.v3.75.fasta	35810	1	6	7	35	0.000635	0.32	HMWPGDIK	K	A	0.95	2.97	0.237	1.41	0	7	0	0	2	983.477	28	35	IPI00211904,IPI00198466
male	Protein	IPI00565415	ipi.RAT.v3.75.fasta	35810	1	6	7	35	0.000635	0.32	IDIGVAGFR	H	L	0.95	3.57	0.277	3.52	0	15	0	0	1	947.531	14	22	IPI00211904,IPI00198466
male	Protein	IPI00565415	ipi.RAT.v3.75.fasta	35810	1	6	7	35	0.000635	0.32	LHNLNTK	K	W	0.95	2.43	0.0813	1.89	19	0	0	0	2	839.473	41	47	IPI00211904,IPI00198466
male	Protein	IPI00565415	ipi.RAT.v3.75.fasta	35810	1	6	7	35	0.000635	0.32	LVFVDNHDNQR	A	G	0.95	3.57	0.261	3.4	0	1	0	0	1	1356.67	120	130	IPI00211904,IPI00198466
male	Protein	IPI00565415	ipi.RAT.v3.75.fasta	35810	1	6	7	35	0.000635	0.32	NMVAFR	R	N	0.95	2.25	0.121	1.2	16	0	0	0	2	737.376	220	225	IPI00211904,IPI00198466
male	Protein	IPI00565415	ipi.RAT.v3.75.fasta	35810	1	6	7	35	0.000635	0.32	NVVNGQPF	R	S	0.95	1.92	0.27	1.89	3	0	0	0	1	874.442	226	233	IPI00211904,IPI00198466
male	Protein	IPI00565415	ipi.RAT.v3.75.fasta	35810	1	6	7	35	0.000635	0.32	NWGEGWGF	K	V	0.95	2.41	0.216	2.33	2	0	0	0	1	952.395	106	113	IPI00211904,IPI00198466
male	Protein	IPI00565415	ipi.RAT.v3.75.fasta	35810	1	6	7	35	0.000635	0.32	TKVAEYMNRHIDIGVAGFR	R	L	0.95	3.4	0.253	2.46	0	12	0	0	2	2193.12	4	22
male	Protein	IPI00565415	ipi.RAT.v3.75.fasta	35810	1	6	7	35	0.000635	0.32	VAEYMNRHIDIGVAGF	K	R	0.95	2.67	0.243	1.82	0	2	0	0	1	1791.88	6	21
male	Protein	IPI00565415	ipi.RAT.v3.75.fasta	35810	1	6	7	35	0.000635	0.32	VAEYMNRHIDIGVAGFR	K	L	0.95	3.72	0.192	2.62	0	13	3	0	2	1947.99	6	22
male	Protein	IPI00565415	ipi.RAT.v3.75.fasta	35810	1	6	7	35	0.000635	0.32	VDNHDNQR	F	G	0.95	2.71	0.211	3.23	2	3	0	0	1	997.445	123	130	IPI00211904,IPI00198466
male	Protein	IPI00565415	ipi.RAT.v3.75.fasta	35810	1	6	7	35	0.000635	0.32	VFVDNHDNQR	L	G	0.95	3.23	0.287	5.55	0	5	0	0	1	1243.58	121	130	IPI00211904,IPI00198466
female	PR-Vbeta1	IPI00211778	ipi.RAT.v3.75.fasta	15570.3	1	6	6	26	0.000609	0.203	RPPPPPPPPPPPFGPGIGQPPPPH	R	F	0.95	5.54	0.537	0	0	0	5	0	1	2424.3	34	57
female	PR-Vbeta1	IPI00211778	ipi.RAT.v3.75.fasta	15570.3	1	6	6	26	0.000609	0.203	RPPPPPPPPPPPFGPGIGQPPPPHF	R	G	0.95	5.35	0.538	0	0	0	3	0	1	2571.37	34	58
female	PR-Vbeta1	IPI00211778	ipi.RAT.v3.75.fasta	15570.3	1	6	6	26	0.000609	0.203	RPPPPPPPPPPPFGPGIGQPPPPHFG	R	P	0.95	4.48	0.401	0	0	0	8	0	1	2628.39	34	59
female	PR-Vbeta1	IPI00211778	ipi.RAT.v3.75.fasta	15570.3	1	6	6	26	0.000609	0.203	RPPPPPPPPPPPFGPGIGQPPPPHFGPG	R	F	0.95	4.98	0.426	0	0	0	5	0	1	2782.46	34	61
female	PR-Vbeta1	IPI00211778	ipi.RAT.v3.75.fasta	15570.3	1	6	6	26	0.000609	0.203	RPPPPPPPPPPPFGPGIGQPPPPHFGPGF	R	G	0.95	3.91	0.507	0	0	0	2	0	1	2929.53	34	62
female	PR-Vbeta1	IPI00211778	ipi.RAT.v3.75.fasta	15570.3	1	6	6	26	0.000609	0.203	RRPPPPPPPPPPPFGPGIGQPPPPHFGPGF	R	G	0.95	3.62	0.456	0	0	0	3	0	1	3085.63	33	62
male	PR-Vbeta1	IPI00211778	ipi.RAT.v3.75.fasta	15570.3	1	5	5	18	0.000327	0.196	RPPPPPPPPPPPFGPGIGQPPPPH	R	F	0.95	4.32	0.285	0	0	0	1	0	1	2424.3	34	57
male	PR-Vbeta1	IPI00211778	ipi.RAT.v3.75.fasta	15570.3	1	5	5	18	0.000327	0.196	RPPPPPPPPPPPFGPGIGQPPPPHF	R	G	0.95	5.07	0.517	0	0	0	2	0	1	2571.37	34	58
male	PR-Vbeta1	IPI00211778	ipi.RAT.v3.75.fasta	15570.3	1	5	5	18	0.000327	0.196	RPPPPPPPPPPPFGPGIGQPPPPHFG	R	P	0.95	3.78	0.49	0	0	0	6	0	1	2628.39	34	59
male	PR-Vbeta1	IPI00211778	ipi.RAT.v3.75.fasta	15570.3	1	5	5	18	0.000327	0.196	RPPPPPPPPPPPFGPGIGQPPPPHFGPG	R	F	0.95	4.79	0.538	0	0	0	6	0	1	2782.46	34	61
male	PR-Vbeta1	IPI00211778	ipi.RAT.v3.75.fasta	15570.3	1	5	5	18	0.000327	0.196	RPPPPPPPPPPPFGPGIGQPPPPHFGPGF	R	G	0.95	3.65	0.356	0	0	0	3	0	1	2929.53	34	62
female	Putative uncharacterized protein Cst10	IPI00870333	ipi.RAT.v3.75.fasta	17164.8	1	8	9	40	0.000937	0.386	AQSDLADCPFNEQPDQQKR	K	A	0.95	2.33	0.0708	4.21	0	0	1	0	2	2247.01	114	132
female	Putative uncharacterized protein Cst10	IPI00870333	ipi.RAT.v3.75.fasta	17164.8	1	8	9	40	0.000937	0.386	FQINVEPWLNK	N	I	0.95	4.1	0.159	3.1	0	1	0	0	1	1387.74	137	147
female	Putative uncharacterized protein Cst10	IPI00870333	ipi.RAT.v3.75.fasta	17164.8	1	8	9	40	0.000937	0.386	GVEPADPNDKEVQK	G	V	0.95	3.63	0.379	2.1	0	1	0	0	1	1525.75	50	63
female	Putative uncharacterized protein Cst10	IPI00870333	ipi.RAT.v3.75.fasta	17164.8	1	8	9	40	0.000937	0.386	NEQPDQQKR	F	A	0.95	3.01	0.185	2.27	0	1	0	0	1	1142.56	124	132
female	Putative uncharacterized protein Cst10	IPI00870333	ipi.RAT.v3.75.fasta	17164.8	1	8	9	40	0.000937	0.386	QINVEPWLNK	F	I	0.95	2.6	0.2	4.3	0	8	0	0	1	1240.67	138	147
female	Putative uncharacterized protein Cst10	IPI00870333	ipi.RAT.v3.75.fasta	17164.8	1	8	9	40	0.000937	0.386	QVAVGGVEPADPNDKEVQK	K	V	0.95	3.99	0.403	4.18	0	19	5	0	2	1980	45	63
female	Putative uncharacterized protein Cst10	IPI00870333	ipi.RAT.v3.75.fasta	17164.8	1	8	9	40	0.000937	0.386	VAVGGVEPADPNDKEVQK	Q	V	0.95	5.21	0.444	5.85	0	1	0	0	1	1851.94	46	63
female	Putative uncharacterized protein Cst10	IPI00870333	ipi.RAT.v3.75.fasta	17164.8	1	8	9	40	0.000937	0.386	VMSASQQVVSGK	R	N	0.95	4.04	0.401	3.43	0	3	0	0	2	1220.63	87	98
male	Putative uncharacterized protein Cst10	IPI00870333	ipi.RAT.v3.75.fasta	17164.8	1	7	7	47	0.000853	0.38	AQSDLADCPFNEQPDQQK	K	R	0.95	6.4	0.531	10.5	0	5	0	0	2	2090.91	114	131
male	Putative uncharacterized protein Cst10	IPI00870333	ipi.RAT.v3.75.fasta	17164.8	1	7	7	47	0.000853	0.38	MSASQQVVSGK	V	N	0.95	0	0	3.57	0	1	0	0	1	1121.56	88	98
male	Putative uncharacterized protein Cst10	IPI00870333	ipi.RAT.v3.75.fasta	17164.8	1	7	7	47	0.000853	0.38	NEQPDQQKR	F	A	0.95	2.89	0.163	1.48	0	2	0	0	1	1142.56	124	132
male	Putative uncharacterized protein Cst10	IPI00870333	ipi.RAT.v3.75.fasta	17164.8	1	7	7	47	0.000853	0.38	QINVEPWLNK	F	I	0.95	2.29	0.198	4.15	0	9	0	0	1	1240.67	138	147
male	Putative uncharacterized protein Cst10	IPI00870333	ipi.RAT.v3.75.fasta	17164.8	1	7	7	47	0.000853	0.38	QVAVGGVEPADPNDK	K	E	0.95	4.66	0.368	6.17	0	3	0	0	2	1495.74	45	59
male	Putative uncharacterized protein Cst10	IPI00870333	ipi.RAT.v3.75.fasta	17164.8	1	7	7	47	0.000853	0.38	QVAVGGVEPADPNDKEVQK	K	V	0.95	4.23	0.417	4.23	0	4	0	0	2	1980	45	63
male	Putative uncharacterized protein Cst10	IPI00870333	ipi.RAT.v3.75.fasta	17164.8	1	7	7	47	0.000853	0.38	VMSASQQVVSGK	R	N	0.95	3.82	0.43	3.7	0	23	0	0	2	1220.63	87	98
female	Putative uncharacterized protein Grpcb	IPI00373414	ipi.RAT.v3.75.fasta	25257.3	1	14	16	108	0.00253	0.234	EQPQQTNPEEKPPAPK	Q	T	0.95	4.1	0.412	4.64	0	2	0	0	1	1817.9	167	182	IPI00211295
female	Putative uncharacterized protein Grpcb	IPI00373414	ipi.RAT.v3.75.fasta	25257.3	1	14	16	108	0.00253	0.234	GRPVVVFR	R	P	0.95	2.81	0.259	2.05	0	13	0	0	1	929.568	206	213
female	Putative uncharacterized protein Grpcb	IPI00373414	ipi.RAT.v3.75.fasta	25257.3	1	14	16	108	0.00253	0.234	IFPFFIYR	K	G	0.95	2.82	0.295	2.28	0	3	0	0	2	1102.61	198	205
female	Putative uncharacterized protein Grpcb	IPI00373414	ipi.RAT.v3.75.fasta	25257.3	1	14	16	108	0.00253	0.234	KIFPFFIYR	K	G	0.95	2.98	0.232	2.07	0	1	0	0	2	1230.7	197	205
female	Putative uncharacterized protein Grpcb	IPI00373414	ipi.RAT.v3.75.fasta	25257.3	1	14	16	108	0.00253	0.234	NSQEQPQQTNPEEKPPAPK	E	T	0.95	4.11	0.234	2.31	0	1	0	0	1	2147.04	164	182	IPI00211295
female	Putative uncharacterized protein Grpcb	IPI00373414	ipi.RAT.v3.75.fasta	25257.3	1	14	16	108	0.00253	0.234	PEEKPPAPK	N	T	0.95	3.15	0.307	1.82	0	3	0	0	1	992.541	174	182	IPI00211295
female	Putative uncharacterized protein Grpcb	IPI00373414	ipi.RAT.v3.75.fasta	25257.3	1	14	16	108	0.00253	0.234	QEQPQQTNPEEKPPAPK	S	T	0.95	3.29	0.358	4.47	0	4	0	0	1	1945.96	166	182	IPI00211295
female	Putative uncharacterized protein Grpcb	IPI00373414	ipi.RAT.v3.75.fasta	25257.3	1	14	16	108	0.00253	0.234	QTNPEEKPPAPK	Q	T	0.95	2.35	0.271	3.74	0	1	0	0	1	1335.69	171	182	IPI00211295
female	Putative uncharacterized protein Grpcb	IPI00373414	ipi.RAT.v3.75.fasta	25257.3	1	14	16	108	0.00253	0.234	RPVVVFR	G	P	0.95	3.02	0.215	0	0	5	0	0	0	872.546	207	213
female	Putative uncharacterized protein Grpcb	IPI00373414	ipi.RAT.v3.75.fasta	25257.3	1	14	16	108	0.00253	0.234	SQEQPQQTNPEEKPPAPK	N	T	0.95	4.93	0.395	9.07	0	20	5	0	1	2032.99	165	182	IPI00211295
female	Putative uncharacterized protein Grpcb	IPI00373414	ipi.RAT.v3.75.fasta	25257.3	1	14	16	108	0.00253	0.234	TNPEEKPPAPK	Q	T	0.95	2.59	0.214	2.31	0	3	0	0	1	1207.63	172	182	IPI00211295
female	Putative uncharacterized protein Grpcb	IPI00373414	ipi.RAT.v3.75.fasta	25257.3	1	14	16	108	0.00253	0.234	TQEEPQHY	K	R	0.95	2.51	0.158	1.55	0	3	0	0	1	1031.44	183	190
female	Putative uncharacterized protein Grpcb	IPI00373414	ipi.RAT.v3.75.fasta	25257.3	1	14	16	108	0.00253	0.234	TQEEPQHYR	K	G	0.95	3.09	0.294	3.16	2	37	0	0	2	1187.54	183	191
female	Putative uncharacterized protein Grpcb	IPI00373414	ipi.RAT.v3.75.fasta	25257.3	1	14	16	108	0.00253	0.234	VESPPSSPENSQEQPQQTNPEEKPPAPK	N	T	0.95	2.16	0.422	10.3	0	0	5	0	1	3056.44	155	182	IPI00211295
male	Putative uncharacterized protein Grpcb	IPI00373414	ipi.RAT.v3.75.fasta	25257.3	1	6	8	71	0.00129	0.195	GRPVVVFR	R	P	0.95	2.79	0.259	2.34	0	6	0	0	1	929.568	206	213
male	Putative uncharacterized protein Grpcb	IPI00373414	ipi.RAT.v3.75.fasta	25257.3	1	6	8	71	0.00129	0.195	RPVVVFR	G	P	0.95	2.62	0.257	0	0	2	0	0	0	872.546	207	213
male	Putative uncharacterized protein Grpcb	IPI00373414	ipi.RAT.v3.75.fasta	25257.3	1	6	8	71	0.00129	0.195	SQEQPQQTNPEEKPPAPK	N	T	0.95	4.65	0.427	7.43	0	3	2	0	1	2032.99	165	182	IPI00211295
male	Putative uncharacterized protein Grpcb	IPI00373414	ipi.RAT.v3.75.fasta	25257.3	1	6	8	71	0.00129	0.195	TQEEPQHY	K	R	0.95	2.59	0.183	1.47	0	4	0	0	1	1031.44	183	190
male	Putative uncharacterized protein Grpcb	IPI00373414	ipi.RAT.v3.75.fasta	25257.3	1	6	8	71	0.00129	0.195	TQEEPQHYR	K	G	0.95	3.27	0.269	3.49	2	51	0	0	2	1187.54	183	191
male	Putative uncharacterized protein Grpcb	IPI00373414	ipi.RAT.v3.75.fasta	25257.3	1	6	8	71	0.00129	0.195	VESPPSSPENSQEQPQQTNPEEKPPAPK	N	T	0.95	2.19	0.116	4.68	0	0	1	0	1	3056.44	155	182	IPI00211295
female	Putative uncharacterized protein Lpo	IPI00370706	ipi.RAT.v3.75.fasta	78231.7	1	6	6	19	0.000445	0.119	AVNEEVSDHGR	M	P	0.95	3.47	0.266	0	0	3	0	0	0	1212.56	329	339
female	Putative uncharacterized protein Lpo	IPI00370706	ipi.RAT.v3.75.fasta	78231.7	1	6	6	19	0.000445	0.119	ELSTLNPHWDGETLY	R	Q	0.95	4.48	0.418	3.36	0	4	0	0	1	1774.83	394	408
female	Putative uncharacterized protein Lpo	IPI00370706	ipi.RAT.v3.75.fasta	78231.7	1	6	6	19	0.000445	0.119	FGHLEIPSTVSR	R	L	0.95	3.08	0.178	2.82	0	1	0	0	2	1342.71	464	475
female	Putative uncharacterized protein Lpo	IPI00370706	ipi.RAT.v3.75.fasta	78231.7	1	6	6	19	0.000445	0.119	KNPALGSANR	R	A	0.95	2.61	0.188	1.64	0	4	0	0	2	1027.56	147	156
female	Putative uncharacterized protein Lpo	IPI00370706	ipi.RAT.v3.75.fasta	78231.7	1	6	6	19	0.000445	0.119	LDENYQPWGSEPELPLHTVF	R	F	0.95	4.72	0.407	6.74	0	5	0	0	1	2371.12	476	495
female	Putative uncharacterized protein Lpo	IPI00370706	ipi.RAT.v3.75.fasta	78231.7	1	6	6	19	0.000445	0.119	VGPLLTCLLGHQFQR	R	V	0.95	4.38	0.458	5	0	2	0	0	2	1738.94	622	636
male	Putative uncharacterized protein Lpo	IPI00370706	ipi.RAT.v3.75.fasta	78231.7	1	7	7	42	0.000762	0.156	AGFVCPTPPYQSLTR	R	E	0.95	3.4	0.302	6.96	0	3	0	0	2	1693.84	278	292
male	Putative uncharacterized protein Lpo	IPI00370706	ipi.RAT.v3.75.fasta	78231.7	1	7	7	42	0.000762	0.156	ELSTLNPHWDGETLY	R	Q	0.95	4.48	0.389	4.08	0	7	0	0	1	1774.83	394	408
male	Putative uncharacterized protein Lpo	IPI00370706	ipi.RAT.v3.75.fasta	78231.7	1	7	7	42	0.000762	0.156	FGHLEIPSTVSR	R	L	0.95	2.98	0.21	5.28	0	1	0	0	2	1342.71	464	475
male	Putative uncharacterized protein Lpo	IPI00370706	ipi.RAT.v3.75.fasta	78231.7	1	7	7	42	0.000762	0.156	GTPSNIDIWLGAIAEPLVPGGR	Y	V	0.95	4.77	0.483	6.64	0	15	0	0	1	2233.2	600	621
male	Putative uncharacterized protein Lpo	IPI00370706	ipi.RAT.v3.75.fasta	78231.7	1	7	7	42	0.000762	0.156	KNPALGSANR	R	A	0.95	2.57	0.223	0	0	1	0	0	2	1027.56	147	156
male	Putative uncharacterized protein Lpo	IPI00370706	ipi.RAT.v3.75.fasta	78231.7	1	7	7	42	0.000762	0.156	LDENYQPWGSEPELPLHTVF	R	F	0.95	4.26	0.403	6.48	0	6	0	0	1	2371.12	476	495
male	Putative uncharacterized protein Lpo	IPI00370706	ipi.RAT.v3.75.fasta	78231.7	1	7	7	42	0.000762	0.156	VGPLLTCLLGHQFQR	R	V	0.95	5.21	0.497	7.37	0	9	0	0	2	1738.94	622	636
female	Putative uncharacterized protein RGD1306750	IPI00869706	ipi.RAT.v3.75.fasta	12528	1	8	12	95	0.00223	0.633	DFVVSSQDVR	R	E	0.95	3.8	0.281	6.54	6	9	0	0	2	1151.57	22	31
female	Putative uncharacterized protein RGD1306750	IPI00869706	ipi.RAT.v3.75.fasta	12528	1	8	12	95	0.00223	0.633	DQQQQQSLQQSQEQQPQPQLQQTK	R	Q	0.95	6.66	0.424	11.3	0	1	3	0	2	2879.39	53	76
female	Putative uncharacterized protein RGD1306750	IPI00869706	ipi.RAT.v3.75.fasta	12528	1	8	12	95	0.00223	0.633	ERQPSSQQGTVGGQSQESQLR	R	D	0.95	5.7	0.521	7.85	0	18	18	0	2	2287.1	32	52
female	Putative uncharacterized protein RGD1306750	IPI00869706	ipi.RAT.v3.75.fasta	12528	1	8	12	95	0.00223	0.633	GQPLPQQQQQQNQR	K	P	0.95	4.38	0.554	7.3	0	16	0	0	1	1677.84	84	97
female	Putative uncharacterized protein RGD1306750	IPI00869706	ipi.RAT.v3.75.fasta	12528	1	8	12	95	0.00223	0.633	QPSSQQGTVGGQSQESQLR	R	D	0.95	4.52	0.616	7.47	0	17	3	0	2	2001.96	34	52
female	Putative uncharacterized protein RGD1306750	IPI00869706	ipi.RAT.v3.75.fasta	12528	1	8	12	95	0.00223	0.633	RDQQQQQSLQQSQEQQPQPQLQQTK	L	Q	0.95	5.7	0.425	4.59	0	0	1	0	1	3035.49	52	76
female	Putative uncharacterized protein RGD1306750	IPI00869706	ipi.RAT.v3.75.fasta	12528	1	8	12	95	0.00223	0.633	SLQQSQEQQPQPQLQQTK	Q	Q	0.95	5.53	0.423	7.22	0	2	0	0	1	2124.07	59	76
female	Putative uncharacterized protein RGD1306750	IPI00869706	ipi.RAT.v3.75.fasta	12528	1	8	12	95	0.00223	0.633	SQQGTVGGQSQESQLR	S	D	0.95	4.58	0.377	6	0	1	0	0	1	1689.82	37	52
male	Putative uncharacterized protein RGD1306750	IPI00869706	ipi.RAT.v3.75.fasta	12528	1	8	12	160	0.0029	0.679	DFVVSSQDVR	R	E	0.95	3.85	0.295	4.82	12	15	0	0	2	1151.57	22	31
male	Putative uncharacterized protein RGD1306750	IPI00869706	ipi.RAT.v3.75.fasta	12528	1	8	12	160	0.0029	0.679	DQQQQQSLQQSQEQQPQPQLQQTK	R	Q	0.95	6.91	0.434	10.8	0	3	5	0	2	2879.39	53	76
male	Putative uncharacterized protein RGD1306750	IPI00869706	ipi.RAT.v3.75.fasta	12528	1	8	12	160	0.0029	0.679	ERQPSSQQGTVGGQSQESQLR	R	D	0.95	6.77	0.533	9.82	0	9	6	0	2	2287.1	32	52
male	Putative uncharacterized protein RGD1306750	IPI00869706	ipi.RAT.v3.75.fasta	12528	1	8	12	160	0.0029	0.679	GQPLPQQQQQQNQR	K	P	0.95	4.7	0.546	9.15	0	46	0	0	1	1677.84	84	97
male	Putative uncharacterized protein RGD1306750	IPI00869706	ipi.RAT.v3.75.fasta	12528	1	8	12	160	0.0029	0.679	QDPNRDFVVSSQDVR	A	E	0.95	0	0	3.6	0	1	0	0	1	1744.83	17	31
male	Putative uncharacterized protein RGD1306750	IPI00869706	ipi.RAT.v3.75.fasta	12528	1	8	12	160	0.0029	0.679	QPSSQQGTVGGQSQESQLR	R	D	0.95	4.52	0.597	7.51	0	51	6	0	2	2001.96	34	52
male	Putative uncharacterized protein RGD1306750	IPI00869706	ipi.RAT.v3.75.fasta	12528	1	8	12	160	0.0029	0.679	SLQQSQEQQPQPQLQQTK	Q	Q	0.95	5.58	0.446	6.05	0	5	0	0	1	2124.07	59	76
male	Putative uncharacterized protein RGD1306750	IPI00869706	ipi.RAT.v3.75.fasta	12528	1	8	12	160	0.0029	0.679	SQQGTVGGQSQESQLR	S	D	0.95	3.28	0.22	0	0	1	0	0	1	1689.82	37	52
male	Putative uncharacterized protein Syne1	IPI00958822	ipi.RAT.v3.75.fasta	919502	1	2	2	2	3.63e-05	0.00125	FSELS	R	S	0.95	0	0	3.42	1	0	0	0	1	582.277	1200	1204
male	Putative uncharacterized protein Syne1	IPI00958822	ipi.RAT.v3.75.fasta	919502	1	2	2	2	3.63e-05	0.00125	TDMES	K	T	0.95	0	0	3.42	1	0	0	0	1	582.208	2234	2238
female	RCG36470	IPI00369047	ipi.RAT.v3.75.fasta	19706.8	0.998	2	2	2	4.69e-05	0.139	HNVNVDESGK	F	E	0.95	2.54	0.336	6.38	0	1	0	0	1	1098.52	117	126
female	RCG36470	IPI00369047	ipi.RAT.v3.75.fasta	19706.8	0.998	2	2	2	4.69e-05	0.139	LDSECQTHTVVGQK	K	H	0.95	4.12	0.351	3.49	0	1	0	0	2	1601.76	75	88
male	RCG36470	IPI00369047	ipi.RAT.v3.75.fasta	19706.8	0.998	2	2	6	0.000109	0.185	LDSECQTHTVVGQK	K	H	0.95	4.23	0.42	3.3	0	5	0	0	2	1601.76	75	88
male	RCG36470	IPI00369047	ipi.RAT.v3.75.fasta	19706.8	0.998	2	2	6	0.000109	0.185	NIPNENTQHLVPTDTCNQ	Y	-	0.95	3.69	0.401	0	0	1	0	0	1	2094.95	156	173
female	Ribonuclease pancreatic beta-type	IPI00211902	ipi.RAT.v3.75.fasta	16805	0.998	2	2	4	9.37e-05	0.237	HIIIACDGNPYVPVHF	K	D	0.95	5.16	0.523	0	0	3	0	0	1	1851.92	133	148
female	Ribonuclease pancreatic beta-type	IPI00211902	ipi.RAT.v3.75.fasta	16805	0.998	2	2	4	9.37e-05	0.237	VHEPLEDVQAICSQGQVTCK	F	N	0.95	6.54	0.534	0	0	1	0	0	1	2298.09	75	94
male	Ribonuclease pancreatic beta-type	IPI00211902	ipi.RAT.v3.75.fasta	16805	0.998	2	2	10	0.000181	0.237	HIIIACDGNPYVPVHF	K	D	0.95	4.64	0.548	0	0	9	0	0	1	1851.92	133	148
male	Ribonuclease pancreatic beta-type	IPI00211902	ipi.RAT.v3.75.fasta	16805	0.998	2	2	10	0.000181	0.237	VHEPLEDVQAICSQGQVTCK	F	N	0.95	3.84	0.417	0	0	0	1	0	1	2298.09	75	94
female	Salivary proline-rich protein	IPI00211674	ipi.RAT.v3.75.fasta	27360.2	1	10	10	22	0.000516	0.464	GGPQQRPPQGPPPPGGPQ	K	Q	0.95	4.1	0.341	0	0	4	0	0	1	1748.88	54	71
female	Salivary proline-rich protein	IPI00211674	ipi.RAT.v3.75.fasta	27360.2	1	10	10	22	0.000516	0.464	GGPQQRPPQGPPPPGGPQQ	K	K	0.95	4.08	0.217	0	0	3	0	0	1	1876.94	54	72
female	Salivary proline-rich protein	IPI00211674	ipi.RAT.v3.75.fasta	27360.2	1	10	10	22	0.000516	0.464	GGPQQRPPQGPPPPGGPQQKPQGPPPPGGPQQR	K	P	0.95	6.16	0.539	0	0	0	4	0	1	3298.7	54	86
female	Salivary proline-rich protein	IPI00211674	ipi.RAT.v3.75.fasta	27360.2	1	10	10	22	0.000516	0.464	GPQGPPPPGGPQQR	Q	P	0.95	2.81	0.29	0	0	1	0	0	0	1369.7	99	112
female	Salivary proline-rich protein	IPI00211674	ipi.RAT.v3.75.fasta	27360.2	1	10	10	22	0.000516	0.464	PGGPQQDPPQGPPPPGGPQQR	P	P	0.95	4.89	0.424	0	0	1	0	0	0	2089.02	212	232
female	Salivary proline-rich protein	IPI00211674	ipi.RAT.v3.75.fasta	27360.2	1	10	10	22	0.000516	0.464	PPPGGPQQKPQGPPPPGGPQQR	P	P	0.95	3.19	0.393	0	0	1	0	0	0	2199.14	65	86
female	Salivary proline-rich protein	IPI00211674	ipi.RAT.v3.75.fasta	27360.2	1	10	10	22	0.000516	0.464	PQQRPPQPGNQQGPPQGPQSGRPQGPQ	R	Q	0.95	4.97	0.46	0	0	0	1	0	0	2843.41	243	269
female	Salivary proline-rich protein	IPI00211674	ipi.RAT.v3.75.fasta	27360.2	1	10	10	22	0.000516	0.464	RPPPSGFLPR	Q	P	0.95	2.73	0.3	0	0	2	0	0	0	1123.64	31	40
female	Salivary proline-rich protein	IPI00211674	ipi.RAT.v3.75.fasta	27360.2	1	10	10	22	0.000516	0.464	RPPQGPPPPGR	Q	P	0.95	2.9	0.325	0	0	2	0	0	0	1155.64	232	242
female	Salivary proline-rich protein	IPI00211674	ipi.RAT.v3.75.fasta	27360.2	1	10	10	22	0.000516	0.464	RPQGPPPPGGPQQGPQGPPPPGGPQQR	Q	P	0.95	5.31	0.412	0	0	0	3	0	0	2663.36	86	112
male	Salivary proline-rich protein	IPI00211674	ipi.RAT.v3.75.fasta	27360.2	1	20	23	249	0.00452	0.544	DPPQGPPPPGGPQQR	Q	P	0.95	3.22	0.252	0	0	1	0	0	0	1524.76	218	232
male	Salivary proline-rich protein	IPI00211674	ipi.RAT.v3.75.fasta	27360.2	1	20	23	249	0.00452	0.544	GGPQQRPPQGPPPPGGPQ	K	Q	0.95	5.48	0.546	10	0	8	0	0	1	1748.88	54	71
male	Salivary proline-rich protein	IPI00211674	ipi.RAT.v3.75.fasta	27360.2	1	20	23	249	0.00452	0.544	GGPQQRPPQGPPPPGGPQQ	K	K	0.95	4.74	0.496	6.68	0	12	0	0	1	1876.94	54	72
male	Salivary proline-rich protein	IPI00211674	ipi.RAT.v3.75.fasta	27360.2	1	20	23	249	0.00452	0.544	GGPQQRPPQGPPPPGGPQQK	K	P	0.95	5.28	0.45	5.89	0	4	3	0	1	2005.04	54	73
male	Salivary proline-rich protein	IPI00211674	ipi.RAT.v3.75.fasta	27360.2	1	20	23	249	0.00452	0.544	GGPQQRPPQGPPPPGGPQQKPQ	K	G	0.95	4.07	0.276	8.48	0	0	4	0	1	2230.15	54	75
male	Salivary proline-rich protein	IPI00211674	ipi.RAT.v3.75.fasta	27360.2	1	20	23	249	0.00452	0.544	GGPQQRPPQGPPPPGGPQQKPQGPPPPGGPQQ	K	R	0.95	6.27	0.435	7.12	0	0	3	0	1	3142.59	54	85
male	Salivary proline-rich protein	IPI00211674	ipi.RAT.v3.75.fasta	27360.2	1	20	23	249	0.00452	0.544	GGPQQRPPQGPPPPGGPQQKPQGPPPPGGPQQR	K	P	0.95	6.01	0.525	5.47	0	0	14	0	1	3298.7	54	86
male	Salivary proline-rich protein	IPI00211674	ipi.RAT.v3.75.fasta	27360.2	1	20	23	249	0.00452	0.544	GPQGPPPPGGPQQR	Q	P	0.95	3.28	0.309	0	0	66	0	0	0	1369.7	99	112
male	Salivary proline-rich protein	IPI00211674	ipi.RAT.v3.75.fasta	27360.2	1	20	23	249	0.00452	0.544	PPQGPPPPGGPQQGPQGPPPPGGPQQGR	S	Q	0.95	4.3	0.407	6.23	0	0	5	0	1	2661.33	179	206
male	Salivary proline-rich protein	IPI00211674	ipi.RAT.v3.75.fasta	27360.2	1	20	23	249	0.00452	0.544	PQGPPPPGGPQQGPQGPPPPGGPQQR	R	P	0.95	5.84	0.505	0	0	8	6	0	0	2507.25	87	112
male	Salivary proline-rich protein	IPI00211674	ipi.RAT.v3.75.fasta	27360.2	1	20	23	249	0.00452	0.544	PQGPPPPGGPQQRPQ	K	G	0.95	4.08	0.53	0	0	13	0	0	0	1537.79	74	88
male	Salivary proline-rich protein	IPI00211674	ipi.RAT.v3.75.fasta	27360.2	1	20	23	249	0.00452	0.544	PQGPPPPGGPQQRPQGPPPPGGPQQ	K	G	0.95	5.97	0.637	0	0	2	0	0	0	2450.23	74	98
male	Salivary proline-rich protein	IPI00211674	ipi.RAT.v3.75.fasta	27360.2	1	20	23	249	0.00452	0.544	PQQRPPQPGNQQGPPQGPQSGR	R	P	0.95	4.73	0.49	0	0	0	8	0	0	2336.16	243	264
male	Salivary proline-rich protein	IPI00211674	ipi.RAT.v3.75.fasta	27360.2	1	20	23	249	0.00452	0.544	PQQRPPQPGNQQGPPQGPQSGRPQGPQ	R	Q	0.95	5.12	0.453	0	0	0	9	0	0	2843.41	243	269
male	Salivary proline-rich protein	IPI00211674	ipi.RAT.v3.75.fasta	27360.2	1	20	23	249	0.00452	0.544	QRPPQPGNQQGPPQGPQSGR	Q	P	0.95	3.55	0.312	0	0	0	1	0	0	2111.05	245	264
male	Salivary proline-rich protein	IPI00211674	ipi.RAT.v3.75.fasta	27360.2	1	20	23	249	0.00452	0.544	RPPPSGFLPR	Q	P	0.95	2.74	0.301	0	0	10	0	0	0	1123.64	31	40
male	Salivary proline-rich protein	IPI00211674	ipi.RAT.v3.75.fasta	27360.2	1	20	23	249	0.00452	0.544	RPPQGPPPPGGPQQK	Q	P	0.95	5.21	0.55	0	0	16	0	0	0	1537.82	59	73
male	Salivary proline-rich protein	IPI00211674	ipi.RAT.v3.75.fasta	27360.2	1	20	23	249	0.00452	0.544	RPPQGPPPPGR	Q	P	0.95	3.44	0.362	0	0	29	0	0	0	1155.64	232	242
male	Salivary proline-rich protein	IPI00211674	ipi.RAT.v3.75.fasta	27360.2	1	20	23	249	0.00452	0.544	RPPQPGNQQGPPQGPQSGR	Q	P	0.95	4.76	0.466	0	0	4	15	0	0	1982.99	246	264
male	Salivary proline-rich protein	IPI00211674	ipi.RAT.v3.75.fasta	27360.2	1	20	23	249	0.00452	0.544	RPQGPPPPGGPQQGPQGPPPPGGPQQR	Q	P	0.95	5.25	0.36	0	0	0	8	0	0	2663.36	86	112
male	Salivary proline-rich protein	IPI00211506	ipi.RAT.v3.75.fasta	16787.4	0.998	2	3	13	0.000236	0.122	KPQGPPPPGGPQQR	G	P	0.95	3.66	0.363	0	0	11	1	0	0	1440.77	122	135
male	Salivary proline-rich protein	IPI00211506	ipi.RAT.v3.75.fasta	16787.4	0.998	2	3	13	0.000236	0.122	PQGPPPPGGPQQRPPQPGN	K	Q	0.95	4.1	0.256	0	0	1	0	0	0	1902.96	123	141
female	Serum albumin	IPI00191737	ipi.RAT.v3.75.fasta	68713.2	1	6	6	14	0.000328	0.135	ATEGPNLVAR	F	S	0.95	2.56	0.276	2.07	0	3	0	0	1	1027.55	593	602
female	Serum albumin	IPI00191737	ipi.RAT.v3.75.fasta	68713.2	1	6	6	14	0.000328	0.135	FKDLGEQHFK	R	G	0.95	3.17	0.205	2.41	0	2	0	0	2	1248.64	35	44
female	Serum albumin	IPI00191737	ipi.RAT.v3.75.fasta	68713.2	1	6	6	14	0.000328	0.135	LQACCDKPVLQK	K	S	0.95	4.15	0.382	4.14	0	3	0	0	2	1459.74	299	310
female	Serum albumin	IPI00191737	ipi.RAT.v3.75.fasta	68713.2	1	6	6	14	0.000328	0.135	RHPDYSVSL	R	L	0.95	2.64	0.274	2.4	0	1	0	0	1	1073.54	361	369
female	Serum albumin	IPI00191737	ipi.RAT.v3.75.fasta	68713.2	1	6	6	14	0.000328	0.135	SQCLAEIEHDNIPADLPSIAADFVEDK	K	E	0.95	4.13	0.456	7.66	0	0	4	0	2	2997.41	311	337
female	Serum albumin	IPI00191737	ipi.RAT.v3.75.fasta	68713.2	1	6	6	14	0.000328	0.135	TFHSDICTLPDKEK	F	Q	0.95	4.77	0.335	0	0	1	0	0	1	1690.81	532	545
female	SMR1 protein	IPI00325582	ipi.RAT.v3.75.fasta	15952.3	0.998	2	2	6	0.000141	0.192	RQQDPSTLPHYL	R	G	0.95	2.78	0.264	0	0	2	0	0	1	1454.74	34	45
female	SMR1 protein	IPI00325582	ipi.RAT.v3.75.fasta	15952.3	0.998	2	2	6	0.000141	0.192	SNPPTQLHSTEQANTK	L	T	0.95	3.8	0.47	0	0	4	0	0	1	1752.85	107	122
male	SMR1 protein	IPI00325582	ipi.RAT.v3.75.fasta	15952.3	1	6	7	45	0.000817	0.356	NPPTQLHSTEQANTK	S	T	0.95	3.12	0.199	0	0	1	0	0	1	1665.82	108	122
male	SMR1 protein	IPI00325582	ipi.RAT.v3.75.fasta	15952.3	1	6	7	45	0.000817	0.356	QQDPSTLPHYL	R	G	0.95	2.59	0.382	0	0	9	0	0	1	1298.64	35	45
male	SMR1 protein	IPI00325582	ipi.RAT.v3.75.fasta	15952.3	1	6	7	45	0.000817	0.356	RQQDPSTLPHYL	R	G	0.95	3.11	0.282	0	0	5	0	0	1	1454.74	34	45
male	SMR1 protein	IPI00325582	ipi.RAT.v3.75.fasta	15952.3	1	6	7	45	0.000817	0.356	SNPPTQLHSTEQANTK	L	T	0.95	3.28	0.579	0	0	22	0	0	1	1752.85	107	122
male	SMR1 protein	IPI00325582	ipi.RAT.v3.75.fasta	15952.3	1	6	7	45	0.000817	0.356	VLVNLPGFITGPPLVVQGTTEY	R	Q	0.95	4.91	0.55	0	0	2	0	0	1	2314.27	71	92
male	SMR1 protein	IPI00325582	ipi.RAT.v3.75.fasta	15952.3	1	6	7	45	0.000817	0.356	VLVNLPGFITGPPLVVQGTTEYQY	R	Q	0.95	6.03	0.503	0	0	3	3	0	1	2605.39	71	94
male	SMR1-alpha1	IPI00210086	ipi.RAT.v3.75.fasta	16264.8	1	2	2	15	0.000272	0.212	PPTQLHSTEQANTK	H	T	0.95	5.78	0.522	0	0	12	0	0	1	1551.78	109	122
male	SMR1-alpha1	IPI00210086	ipi.RAT.v3.75.fasta	16264.8	1	2	2	15	0.000272	0.212	VLVNLPGFITGPPLVVQ	R	G	0.95	4.71	0.427	0	0	3	0	0	1	1763.05	71	87
female	Spermatogenesis-associated protein 19, mitochondrial	IPI00200836	ipi.RAT.v3.75.fasta	18023.3	0.998	2	2	3	7.03e-05	0.117	CDSSSDPCYR	R	N	0.95	0	0	3.42	2	0	0	0	2	1189.42	139	148
female	Spermatogenesis-associated protein 19, mitochondrial	IPI00200836	ipi.RAT.v3.75.fasta	18023.3	0.998	2	2	3	7.03e-05	0.117	EKISINDP	K	C	0.95	1.81	0.129	1.21	1	0	0	0	1	915.478	56	63
female	Submandibular gland protein C	IPI00454347	ipi.RAT.v3.75.fasta	67742.3	1	14	16	126	0.00295	0.277	DDPTAQGPQATASSTPK	G	Q	0.95	3.82	0.494	11.7	0	2	0	0	1	1671.78	142	158
female	Submandibular gland protein C	IPI00454347	ipi.RAT.v3.75.fasta	67742.3	1	14	16	126	0.00295	0.277	DSGSHNLSSGSGSSVR	S	S	0.95	4.97	0.476	5	0	3	0	0	1	1533.69	621	636
female	Submandibular gland protein C	IPI00454347	ipi.RAT.v3.75.fasta	67742.3	1	14	16	126	0.00295	0.277	DTGNTSDSGSHNLSSGSGSSVR	L	S	0.95	6.66	0.51	8.03	0	2	0	0	1	2108.91	615	636
female	Submandibular gland protein C	IPI00454347	ipi.RAT.v3.75.fasta	67742.3	1	14	16	126	0.00295	0.277	EQSSADSLLEESQNLGNESPTEASGSADKPTAH	R	S	0.95	4.1	0.223	6.1	0	0	1	0	1	3386.51	182	214
female	Submandibular gland protein C	IPI00454347	ipi.RAT.v3.75.fasta	67742.3	1	14	16	126	0.00295	0.277	GAGSLDTGNTSDSGSHNLSSGSGSSVR	F	S	0.95	6.32	0.62	2.03	0	5	5	0	1	2494.1	610	636
female	Submandibular gland protein C	IPI00454347	ipi.RAT.v3.75.fasta	67742.3	1	14	16	126	0.00295	0.277	GSLDTGNTSDSGSHNLSSGSGSSVR	A	S	0.95	6.38	0.592	7.6	0	1	0	0	1	2366.05	612	636
female	Submandibular gland protein C	IPI00454347	ipi.RAT.v3.75.fasta	67742.3	1	14	16	126	0.00295	0.277	LGLDGAASVNTNLDASATHR	R	V	0.95	5.33	0.503	1.2	0	51	36	0	2	1982.99	72	91
female	Submandibular gland protein C	IPI00454347	ipi.RAT.v3.75.fasta	67742.3	1	14	16	126	0.00295	0.277	LSVHSTNDPSAEPG	K	D	0.95	3.06	0.387	4.64	0	3	0	0	1	1410.65	128	141
female	Submandibular gland protein C	IPI00454347	ipi.RAT.v3.75.fasta	67742.3	1	14	16	126	0.00295	0.277	NSGGNKDDSVSAGGK	K	E	0.95	5.31	0.41	8.82	0	3	0	0	2	1392.64	49	63
female	Submandibular gland protein C	IPI00454347	ipi.RAT.v3.75.fasta	67742.3	1	14	16	126	0.00295	0.277	SNVSIGAGPSDQNESADLGGSGR	R	V	0.95	7.14	0.642	11.7	0	2	0	0	2	2174.99	637	659
female	Submandibular gland protein C	IPI00454347	ipi.RAT.v3.75.fasta	67742.3	1	14	16	126	0.00295	0.277	TNLDASATHR	N	V	0.95	3.3	0.327	5.28	0	5	0	0	1	1085.53	82	91
female	Submandibular gland protein C	IPI00454347	ipi.RAT.v3.75.fasta	67742.3	1	14	16	126	0.00295	0.277	TSDSGSHNLSSGSGSSVR	N	S	0.95	5.21	0.474	7.35	0	3	0	0	1	1721.77	619	636
female	Submandibular gland protein C	IPI00454347	ipi.RAT.v3.75.fasta	67742.3	1	14	16	126	0.00295	0.277	VGGSGSSTTPQKDER	R	S	0.95	3.9	0.334	2.39	0	3	0	0	2	1505.72	92	106
female	Submandibular gland protein C	IPI00454347	ipi.RAT.v3.75.fasta	67742.3	1	14	16	126	0.00295	0.277	VSGPSSSAVVSTDSGDDGNLEDK	K	Q	0.95	5.68	0.526	9.44	0	1	0	0	2	2222.99	568	590
male	titin	IPI00959327	ipi.RAT.v3.75.fasta	3.70472e+06	1	3	3	3	5.44e-05	0.000899	FESIS	K	A	0.95	0	0	3.42	1	0	0	0	1	582.277	16194	16198
male	titin	IPI00959327	ipi.RAT.v3.75.fasta	3.70472e+06	1	3	3	3	5.44e-05	0.000899	KKPVPIPK	E	K	0.95	0	0	3.03	1	0	0	0	1	906.614	9323	9330
male	titin	IPI00959327	ipi.RAT.v3.75.fasta	3.70472e+06	1	3	3	3	5.44e-05	0.000899	VSAINGAGKGDSCEVTG	R	T	0.95	3.25	0.194	0	0	1	0	0	1	1564.73	28270	28286
female	Von Ebner gland protein 1	IPI00197508	ipi.RAT.v3.75.fasta	19708.1	1	3	4	6	0.000141	0.232	AGGLNPDNIFIPK	R	Q	0.95	3.56	0.277	3.92	0	1	0	0	2	1355.73	155	167
female	Von Ebner gland protein 1	IPI00197508	ipi.RAT.v3.75.fasta	19708.1	1	3	4	6	0.000141	0.232	HHFQIAK	R	L	0.95	2.56	0.169	0.721	2	0	0	0	2	880.479	127	133
female	Von Ebner gland protein 1	IPI00197508	ipi.RAT.v3.75.fasta	19708.1	1	3	4	6	0.000141	0.232	LVGRDPEINQEALEDFQSVVR	K	A	0.95	4.55	0.398	4.89	0	1	2	0	2	2414.23	134	154
aSalivas for one male and one female were subjected to MUDPIT analysis and the spectra searched against the ipi.RAT.v3.75.fasta database
