# Supplementary material for: Positive Selection Shaped the Convergent Evolution of Independently Expanded Kallikrein Subfamilies Expressed in Mouse and Rat Saliva Proteomes
Source: PLoS One. 2011 Jun 14;6(6):e20979. doi: 10.1371/journal.pone.0020979 (PMC3114847; doi:10.1371/journal.pone.0020979)
Supplement: Table S7 — Kallikrein subfamily gene coordinates. (XLS) [file pone.0020979.s011.xls]

## Sheet: Sheet1
Table S7. Kallikrein subfamily gene coordinates
Mouse Klk1b subfamily of kallikreins (expressed genes only; the progenitor Klk1 is included)
GENE	CHR	STRAND (p/n)	mm9 coordinates		LENGTH
Klk1	7	p	51480849	51484936	4088
Klk1b5	7	p	51471871	51476021	4151
Klk1b4	7	p	51462824	51467072	4249
Klk1b3	7	p	51453617	51457672	4056
Klk1b24	7	p	51443643	51447773	4131
Klk1b16	7	p	51392689	51396928	4240
Klk1b22	7	p	51368072	51372243	4172
Klk1b21	7	p	51357734	51361901	4168
Klk1b27	7	p	51307711	51312033	4323
Klk1b26	7	p	51268090	51272287	4198
Klk1b11	7	p	51251275	51255193	3919
Klk1b9	7	p	51231467	51235695	4229
Klk1b1	7	p	51222157	51226640	4484
Klk1b8	7	p	51206061	51210262	4202
Rat Klk1c subfamily of kallikreins (expressed genes only; the progenitor Klk1 is included)
GENE	CHR	STRAND (p/n)	mm9 coordinates		LENGTH	Primer set of MacDonald et al. 1996
Klk1	1	p	94692856	94697011	4155	KLK1
Klk1c3	1	p	94657133	94658050	917	KLK3
Klk1c7	1	p	94624828	94628819	3991	KLK7
Klk1c9	1	p	94579507	94583311	3804	KLK9
Klk1c8	1	p	94527344	94531132	3788	KLK8
Klk1c2	1	n	94471739	94475837	4098	KLK2									3rd party annotation
Klk1c6	1	n	94447038	94455169	8131	KLK6
Klk1c4	1	n	94412806	94414858	2052	KLK4
Klk1c10	1	n	94380689	94384705	4016	KLK10
Klk1c12	1	n	94355761	94357866	2105	KLK12
Notes: See Lundwall et al., 2006, for mouse Klk1b-family and rat Klk1c-family nomenclature
